# Supplementary material for: Photochemical and electrochemical regioselective cross-dehydrogenative C(sp2)–H sulfenylation and selenylation of substituted benzo[a]phenazin-5-ols
Source: Royal Society of Chemistry journal article supplement (doi:10.1039/d2nj02224a), 2022-01-01
Supplement: d2nj02224a1.pdf [file d2nj02224a1.pdf]

**Photochemical and electrochemical regioselective *cross*-dehydrogenative C(sp<sup>2</sup>)-H sulfenylation and selenylation of substituted benzo[*a*]phenazin-5-ols**

Nayana Nayek, Pintu Karmakar, Mullicka Mandal, Indrajit Karmakar and Goutam Brahmachari\*

Laboratory of Natural Products & Organic Synthesis, Department of Chemistry,  
Visva-Bharati (a Central University), Santiniketan-731 235, West Bengal, India.

\*Corresponding author: Prof.Dr.GoutamBrahmachari

(<http://orcid.org/0000-0001-9925-6281>)

E-mail: brahmg2001@yahoo.co.in; goutam.brahmachari@visva-bharati.ac.in

**Electronic Supplementary Information (ESI) for *New Journal of Chemistry***

## *Table of Contents*

|    |                                                                                                                                                                                                                                                                                                                                                                                 |                  |
|----|---------------------------------------------------------------------------------------------------------------------------------------------------------------------------------------------------------------------------------------------------------------------------------------------------------------------------------------------------------------------------------|------------------|
| 1. | General .....                                                                                                                                                                                                                                                                                                                                                                   | <b>S1</b>        |
| 2. | Pictorial views of the experimental Set-up ( <b>Figure 1</b> ).....                                                                                                                                                                                                                                                                                                             | <b>S2</b>        |
| 3. | Physical and spectral data of all the synthesized benzo[ <i>a</i> ]phenazine derivatives <b>1</b> .....                                                                                                                                                                                                                                                                         | <b>S3</b>        |
| 4. | Scanned copies of <sup>1</sup> H-NMR, <sup>13</sup> C-NMR for all the synthesized benzo[ <i>a</i> ]phenazine derivatives <b>1</b> ( <b>1a-1e</b> ).....                                                                                                                                                                                                                         | <b>S4-S13</b>    |
| 5. | Scanned copies of <sup>1</sup> H-NMR, <sup>13</sup> C-NMR, DEPT-135 NMR, <sup>77</sup> Se NMR, 2D-NMR (for representative compound <b>3e</b> , along with showing the corresponding homo- and hetero-nuclear interactions in Table S1) and HRMS spectra for all the synthesized benzo[ <i>a</i> ]phenazin-5-ols <b>3</b> ( <b>3a-3q</b> ) and <b>3'</b> ( <b>3'a-3'e</b> )..... | <b>S14-S113</b>  |
| 6. | Scanned copies of <sup>1</sup> H NMR spectra for all the synthesized benzophenones <b>7</b> ( <b>7a-7c</b> ) and benzaldehydes <b>9</b> ( <b>9a-9b</b> ).....                                                                                                                                                                                                                   | <b>S114-S118</b> |
| 7. | Single X-ray crystal structure analysis of 6-(Phenylthio)benzo[ <i>a</i> ]phenazin-5-ol ( <b>3a</b> ).....                                                                                                                                                                                                                                                                      | <b>S119-S120</b> |
| 8. | References.....                                                                                                                                                                                                                                                                                                                                                                 | <b>S121</b>      |

## EXPERIMENTAL SECTION

### 1. General.

All chemicals (analytical grade) other than benzo[*a*]phenazin-5-ols were purchased from reputed companies and used without further purification. Benzo[*a*]phenazin-5-ols (**1a-1e**) used in this present study were prepared out of the reaction between 2-hydroxynaphthoquinone and *o*-phenylenediamines as per the previously reported procedure.<sup>1</sup> <sup>1</sup>H-, <sup>13</sup>C-, <sup>77</sup>Se-NMR spectra were collected at 400, 100 and 76 MHz, respectively, on a Bruker DRX spectrometer using CDCl<sub>3</sub> and DMSO-*d*<sub>6</sub> containing 1-2 drops of saturated NaOH solution in D<sub>2</sub>O, as the solvents. Chemical shifts were reported in  $\delta$  (ppm), relative to the internal standard, TMS. The signals observed are described as s (singlet), d (doublet), t (triplet), and m (multiplet). Coupling constants are reported as *J* value in Hz. Mass spectrometry was obtained using a Bruker maXis Impact (Q-TOF), Agilent (Q-TOF), and Microtek Q-TOF Micro YA 263 Waters high-resolution mass spectrometer. X-ray single crystallographic data were collected on X'Calibur CCD area-detector diffractometer. UV spectra were recorded on a SHIMADZU UV-3101PC spectrophotometer. Melting point was recorded on a Chemiline CL-725 melting point apparatus and is uncorrected. Thin Layer Chromatography (TLC) was performed using silica gel 60 F254 (Merck) plates. Philips 9 W Standard B22 white LED Bulbs (Manufacturer: PHILIPS; Model and other details: LED Lamp B22d Crystal White, 9 W, F6500, Lumen 825 lm (91.7 lm/W), 0.060 A, 220-240 Vac, 50 Hz) were used as the light source. For accessing direct sunlight, all reactions were carried out on an open roof-top (Chemistry Building). A 'MetraVavi RPS-3005 DC Regulated Power Supply' and Graphite, Pt, Ag, Zn, and Cu plate-electrodes were used to perform the electrochemical cell reactions.

## 2. Pictorial views of the experimental Set-ups

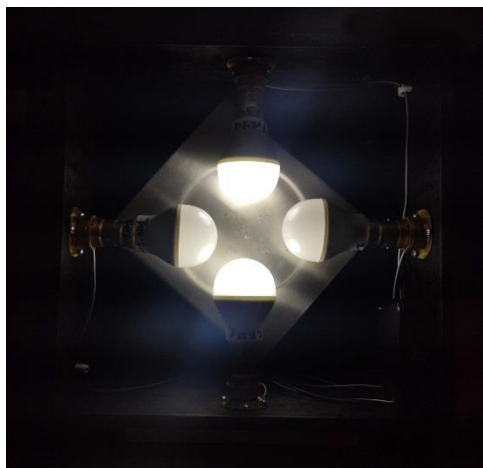

Figure S1a

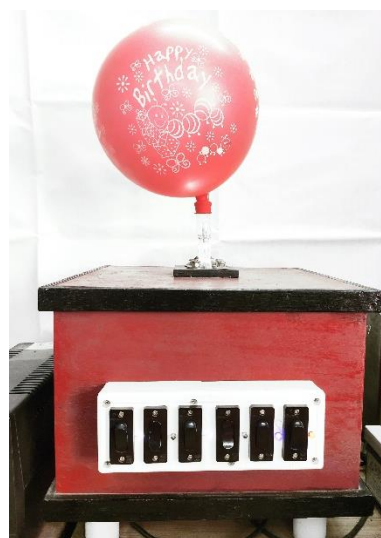

Figure S1b

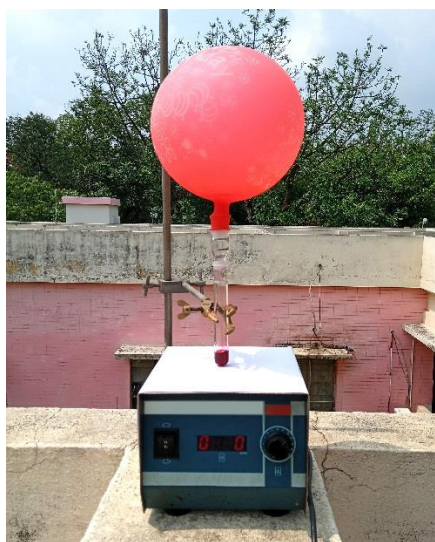

Figure S1c

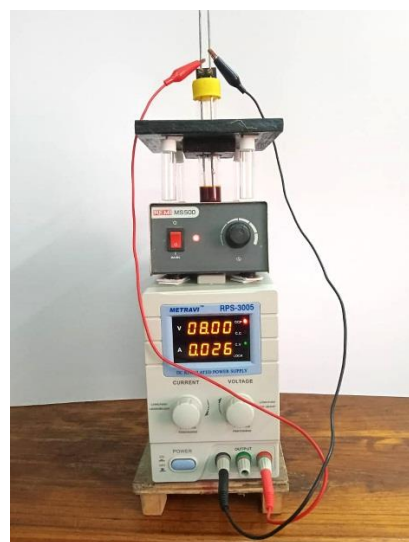

Figure S1d

**Figure S1:** (a) A pictorial view (from the top end) at the time of lightening of two white LED ( $2 \times 9$  W) positioned face to face; (b) Pictorial view at the time of running the experiment; (c) Pictorial view of the reaction set-up in open sunlight on the roof-top (Dept. of Chemistry, Visva-Bharati), (d) 'Metravi RPS-3005 DC Regulated Power Supply' and Platinum || Graphite plate-electrodes were used to perform the electrochemical cell reactions.

### 3. The spectral data of all the synthesized benzo[*a*]phenazin derivatives 1 (1a – 1e) are given below:

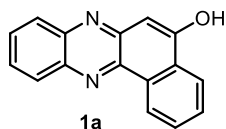

**Benzo[*a*]phenazin-5-ol (1a).**<sup>1a</sup> Orange amorphous solid; yield: 89% (220 mg, 1 mmol scale); mp = 296 °C. <sup>1</sup>H NMR (400 MHz, DMSO-*d*<sub>6</sub>): δ = 9.16-9.13 (m, 1H, Ar-H), 8.43-8.41 (m, 1H, Ar-H), 8.10 (d, 1H, *J* = 8.0 Hz, Ar-H), 7.90 (d, 1H, *J* = 8.4 Hz, Ar-H), 7.84-7.77 (m, 2H, Ar-H), 7.71-7.68 (m, 1H, Ar-H), 7.60-7.56 (m, 1H, Ar-H), 6.77 (s, 1H, HC=C(OH)-) ppm. <sup>13</sup>C NMR (400 MHz, DMSO-*d*<sub>6</sub>): δ = 166.39, 148.19, 143.11, 139.72, 137.85, 133.66, 131.46, 129.54, 129.17 (2C), 127.90, 126.92, 125.39, 124.53, 124.19, 101.51 ppm.

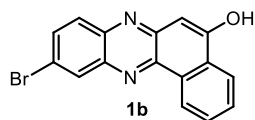

**10-Bromobenzo[*a*]phenazin-5-ol (1b).** Yellow crystalline solid; yield: 94% (308 mg, 1 mmol scale); mp = 274-276 °C. <sup>1</sup>H NMR (400 MHz, DMSO-*d*<sub>6</sub>): δ = 11.61 (br s, 1H, Ar-OH), 9.16 (m, 1H, Ar-H), 8.41-8.28 (m, 2H, Ar-H), 8.15-8.03 (m, 1H, Ar-H), 7.95-7.88 (m, 3H, Ar-H), 7.14 (s, 1H, HC=C(OH)-) ppm. <sup>13</sup>C NMR (400 MHz, DMSO-*d*<sub>6</sub>): δ = 157.45, 145.56, 141.21, 139.88, 133.15, 131.45, 131.07, 130.95, 130.64, 130.43, 129.96, 128.87, 124.94, 122.97, 121.11, 103.31 ppm.

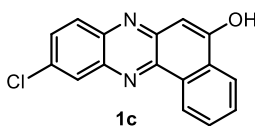

**10-Chlorobenzo[*a*]phenazin-5-ol (1c).**<sup>1c</sup> Greenish yellow crystalline solid; yield: 87% (244 mg, 1 mmol scale); mp = 280-282 °C. <sup>1</sup>H NMR (400 MHz, DMSO-*d*<sub>6</sub>): δ = 11.61 (br s, 1H, Ar-OH), 9.18-9.17 (m, 1H, Ar-H), 8.30-8.22 (m, 2H, Ar-H), 8.15-8.11 (m, 1H, Ar-H), 7.92-7.78 (m, 3H, Ar-H), 7.14 (s, 1H, HC=C(OH)-) ppm. <sup>13</sup>C NMR (400 MHz, DMSO-*d*<sub>6</sub>): δ = 157.38, 145.48, 141.03, 139.49, 132.57, 131.05, 130.76, 130.70, 130.61, 130.41, 129.91, 128.84, 127.62, 124.94, 122.95, 103.29 ppm.

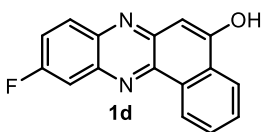

**10-Fluorobenzo[*a*]phenazin-5-ol (1d).** Yellow amorphous solid; yield: 92% (243 mg, 1 mmol scale); mp = 283-286 °C. <sup>1</sup>H NMR (400 MHz, DMSO-*d*<sub>6</sub>): δ = 11.57 (br s, 1H, Ar-OH), 9.23-9.21 (m, 1H, Ar-H), 8.32-8.30 (m, 1H, Ar-H), 8.23-8.19 (m, 1H, Ar-H), 8.02-7.98 (m, 1H, Ar-H), 7.94-7.88 (m, 2H, Ar-H), 7.86-7.80 (m, 1H, Ar-H), 7.18 (s, 1H, HC=C(OH)-) ppm. <sup>13</sup>C NMR (400 MHz, DMSO-*d*<sub>6</sub>): δ = 159.62 (*J*<sub>CF</sub> = 554 Hz), 159.92, 144.86, 139.95, 139.76, 130.69, 130.57, 130.41, 128.96, 128.81, 124.97, 124.70, 122.95, 120.96 (*J*<sub>CF</sub> = 26 Hz), 111.98 (*J*<sub>CF</sub> = 21 Hz), 103.30 ppm.

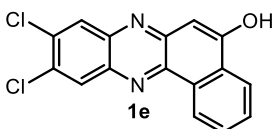

**9,10-dichlorobenzo[*a*]phenazin-5-ol (1e).**<sup>1a</sup> Orange amorphous solid; yield: 95% (299 mg, 1 mmol scale); mp = 295-297 °C. <sup>1</sup>H NMR (400 MHz, DMSO-*d*<sub>6</sub>): δ = 9.06-9.04 (m, 1H, Ar-H), 8.35-8.33 (m, 1H, Ar-H), 8.27 (s, 1H, Ar-H), 8.06 (s, 1H, Ar-H), 7.84-7.77 (m, 2H, Ar-H), 6.57 (s, 1H, HC=C(OH)-) ppm. <sup>13</sup>C NMR (400 MHz, DMSO-*d*<sub>6</sub>): δ = 168.51, 167.60, 153.03, 149.12, 142.46, 140.97, 136.29, 131.07, 130.01, 129.52 (2C), 128.11, 127.05, 124.99, 124.16, 101.29 ppm.

4. Scanned copies of  $^1\text{H}$  NMR and  $^{13}\text{C}$  NMR spectra for all the synthesized benzo[*a*]phenazin derivatives 1 (1a – 1e) (Figure S1 – S10)

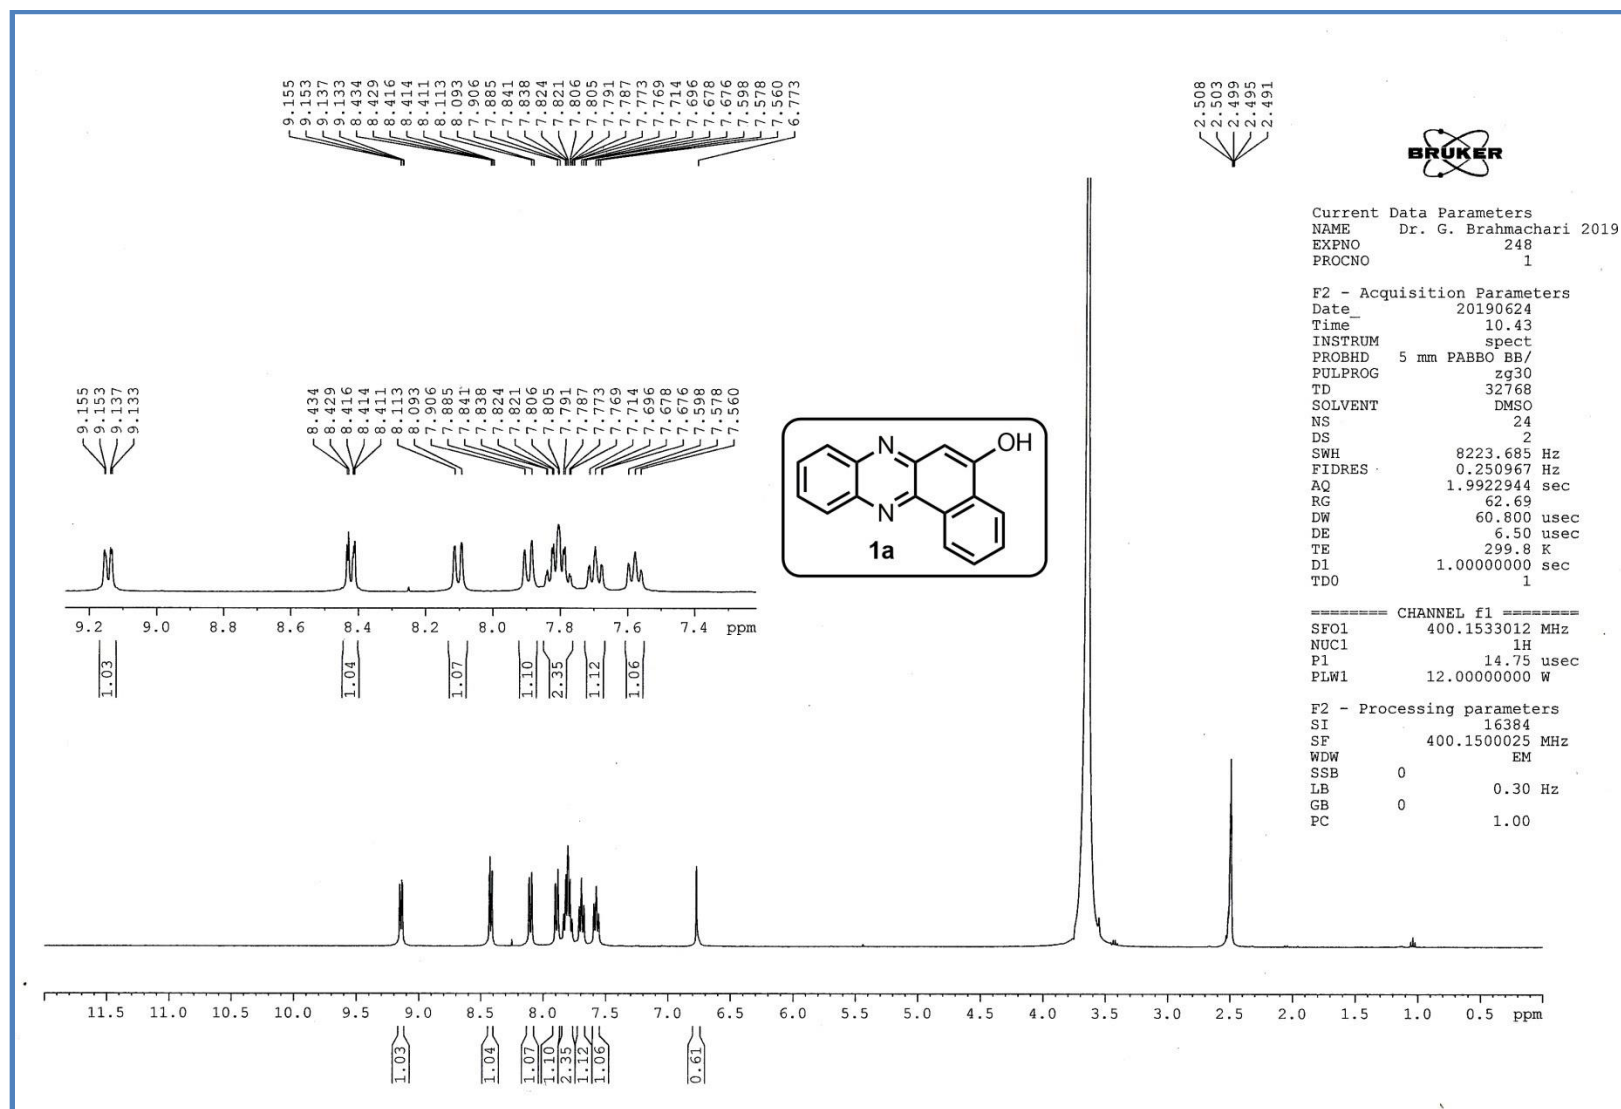

Figure S1.  $^1\text{H}$ -NMR spectrum of benzo[*a*]phenazin-5-ol (**1a**)

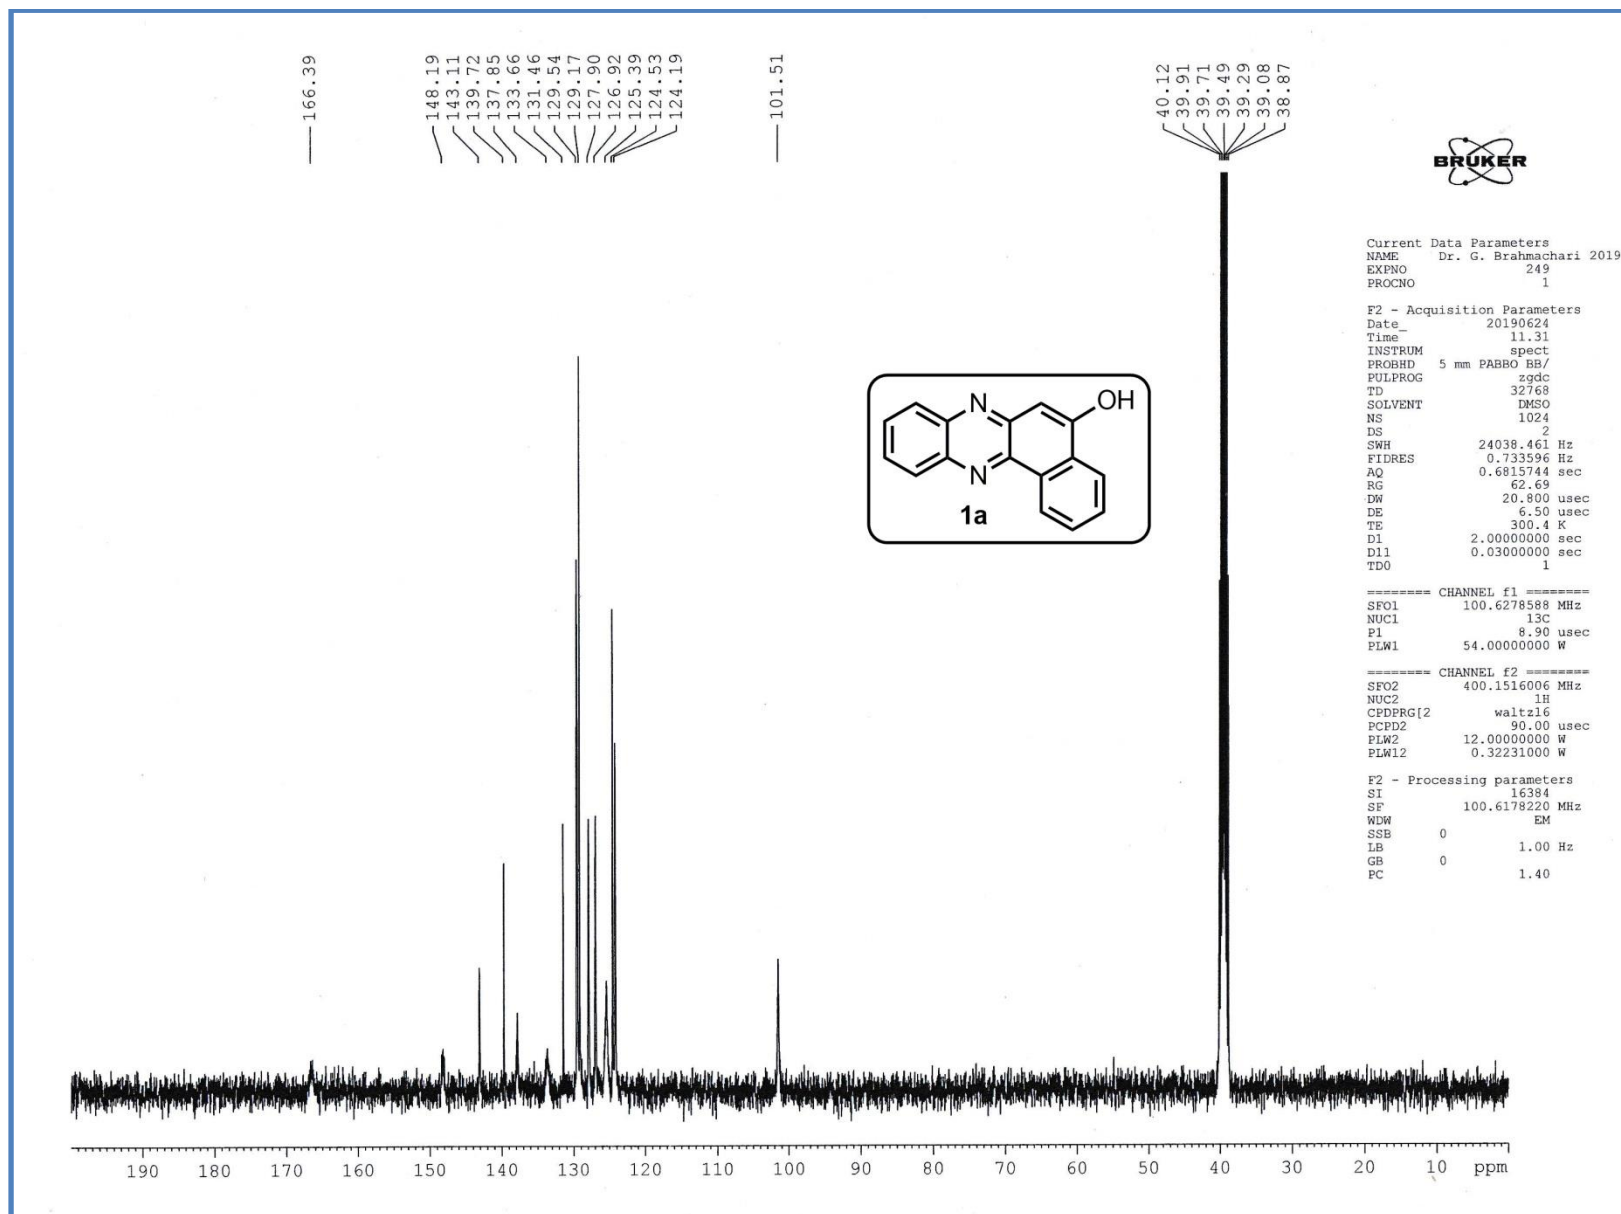

Figure S2. <sup>13</sup>C-NMR spectrum of benzo[a]phenazin-5-ol (**1a**)

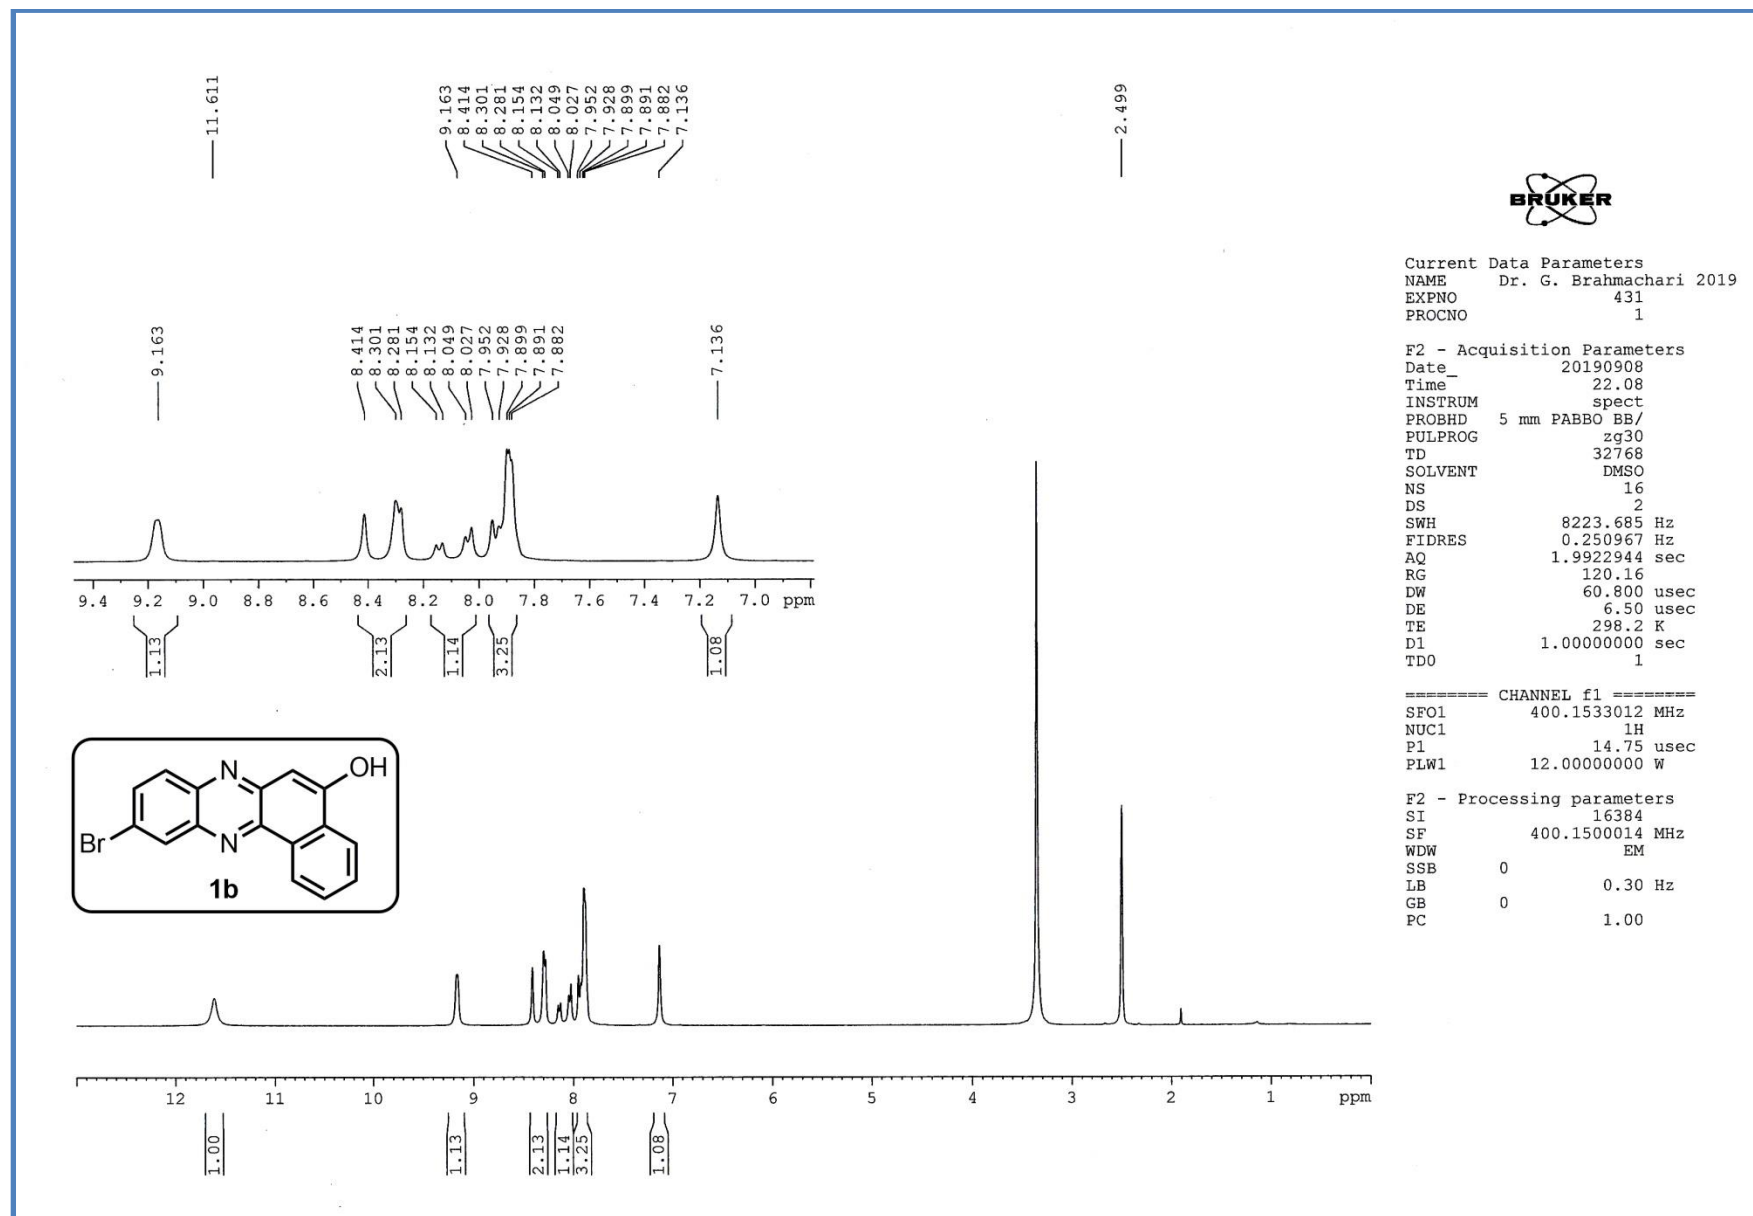

Figure S3. <sup>1</sup>H-NMR spectrum of 10-bromobenzo[*a*]phenazin-5-ol (**1b**)



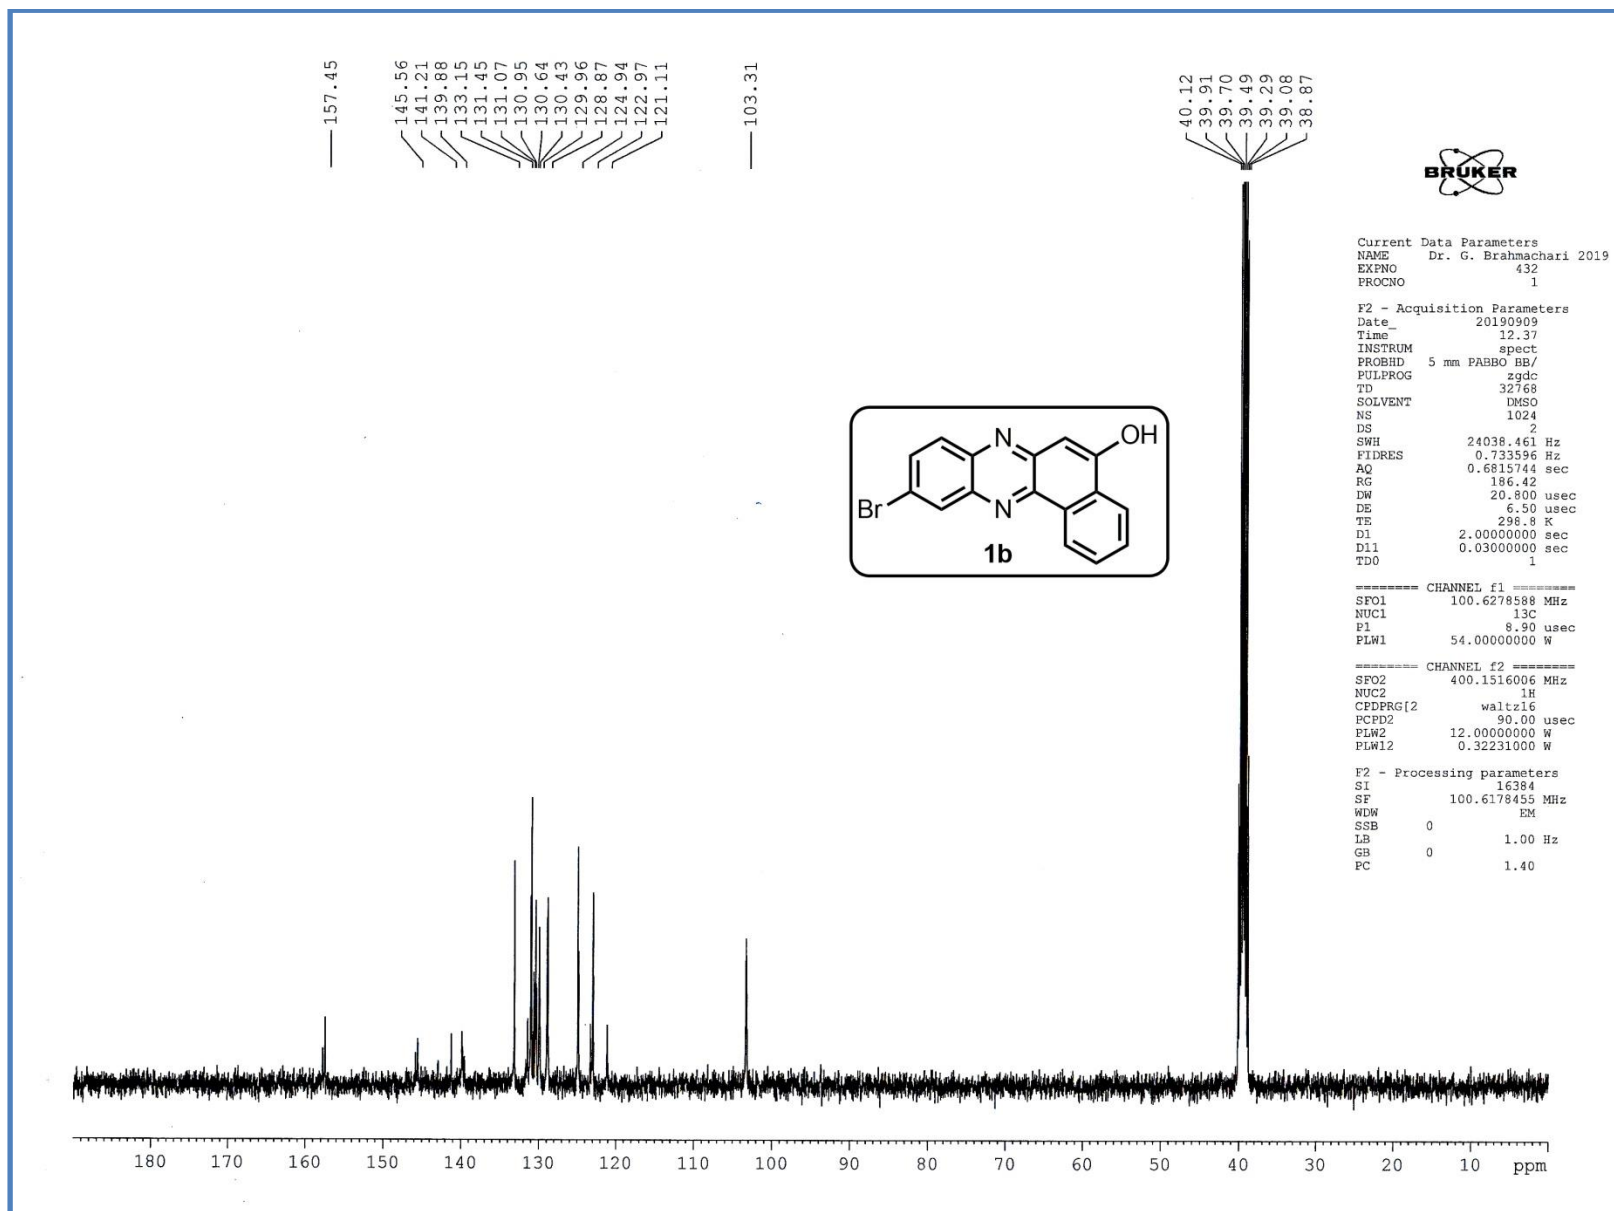

Figure S4. <sup>13</sup>C-NMR spectrum of 10-bromobenzo[*a*]phenazin-5-ol (**1b**)



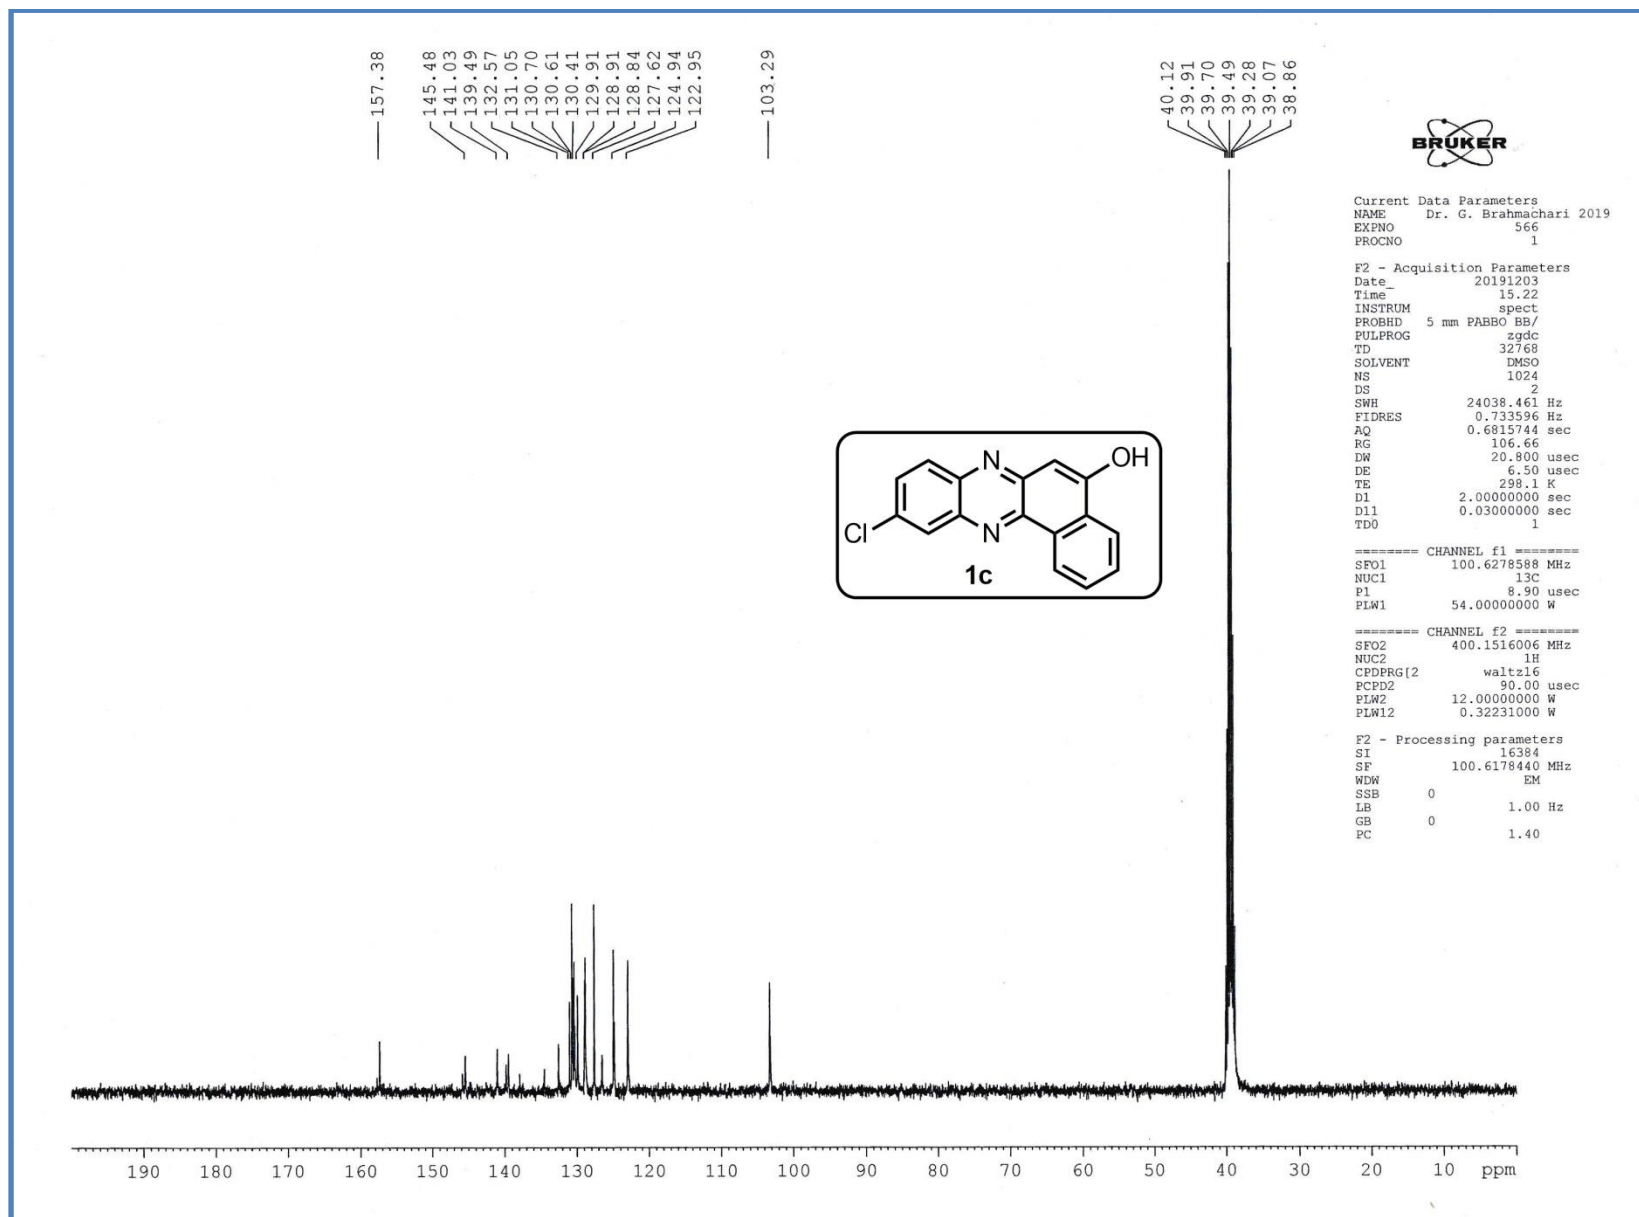

Figure S6. <sup>13</sup>C-NMR spectrum of 10-chlorobenzo[a]phenazin-5-ol (**1c**)

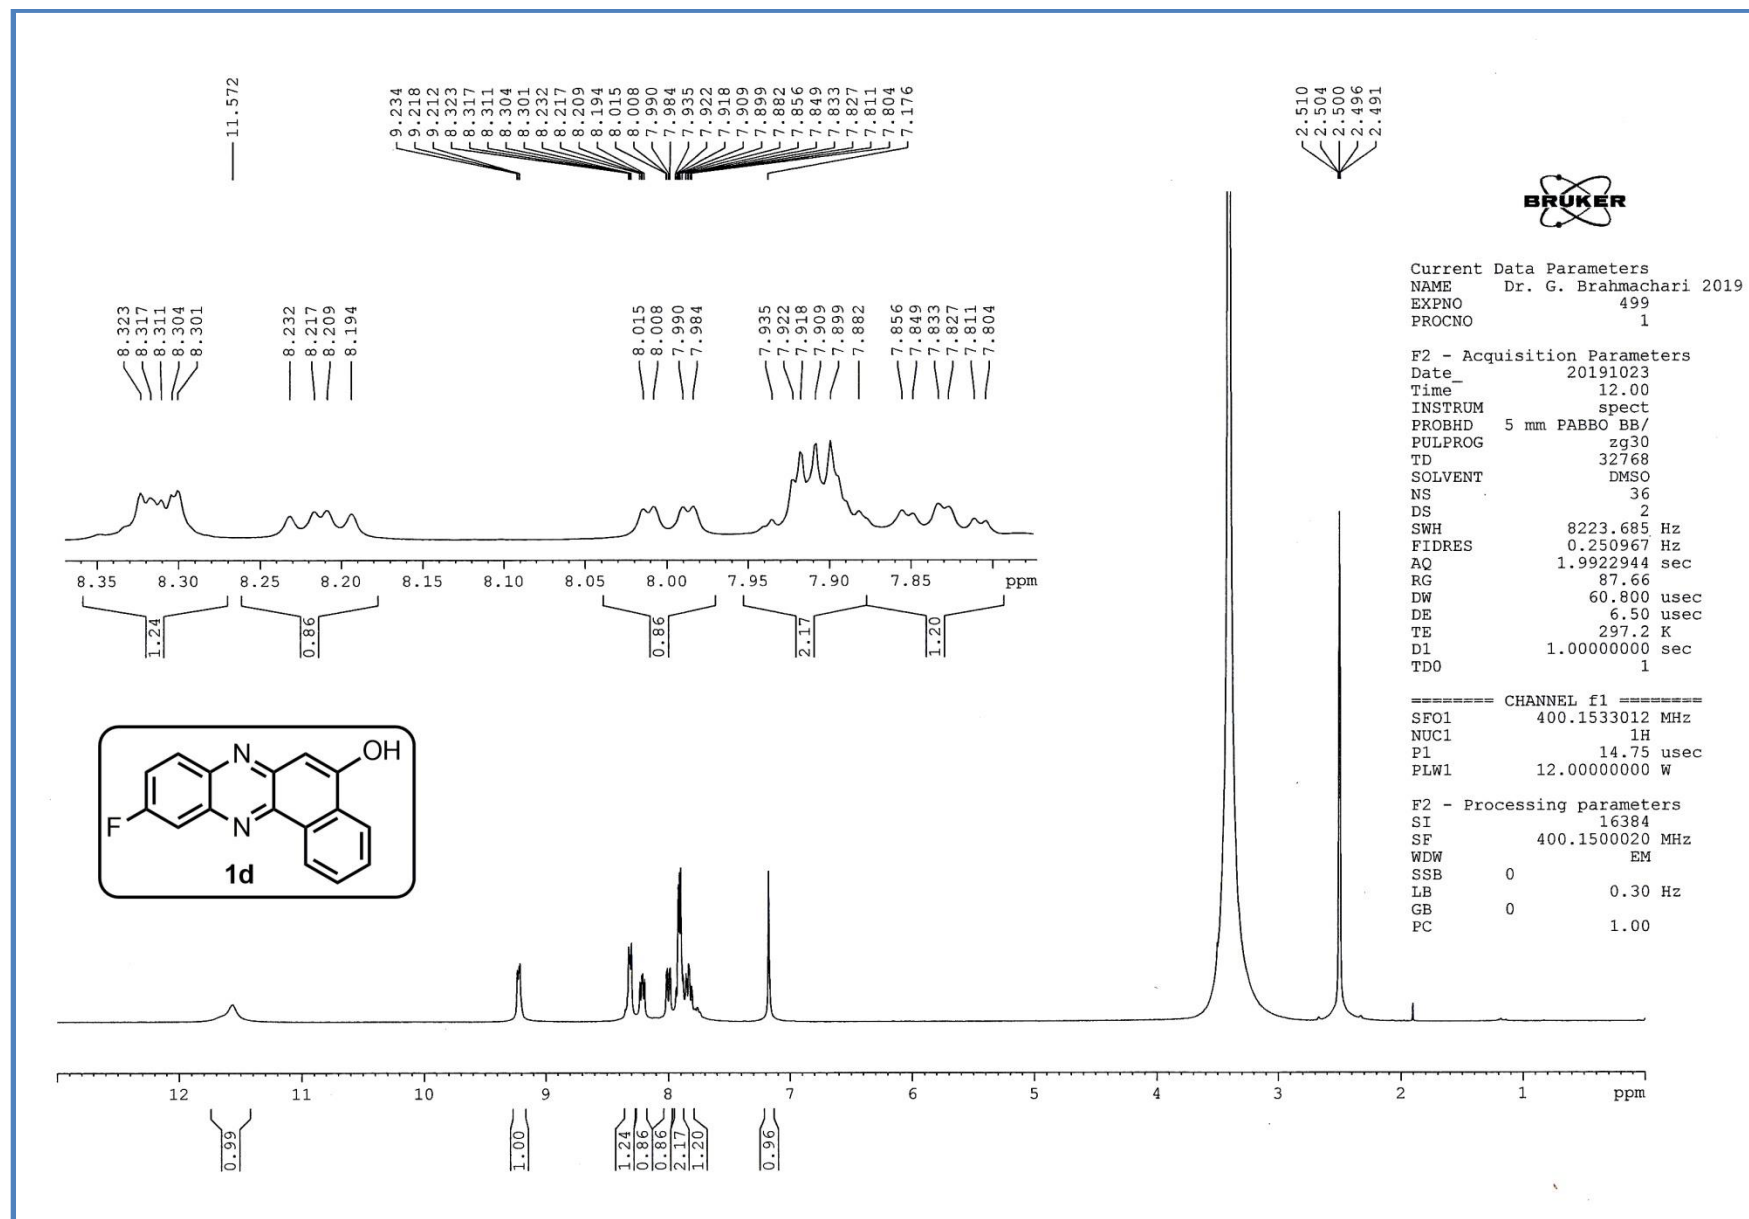

Figure S7. <sup>1</sup>H-NMR spectrum of 10-fluorobenzo[*a*]phenazin-5-ol (**1d**)

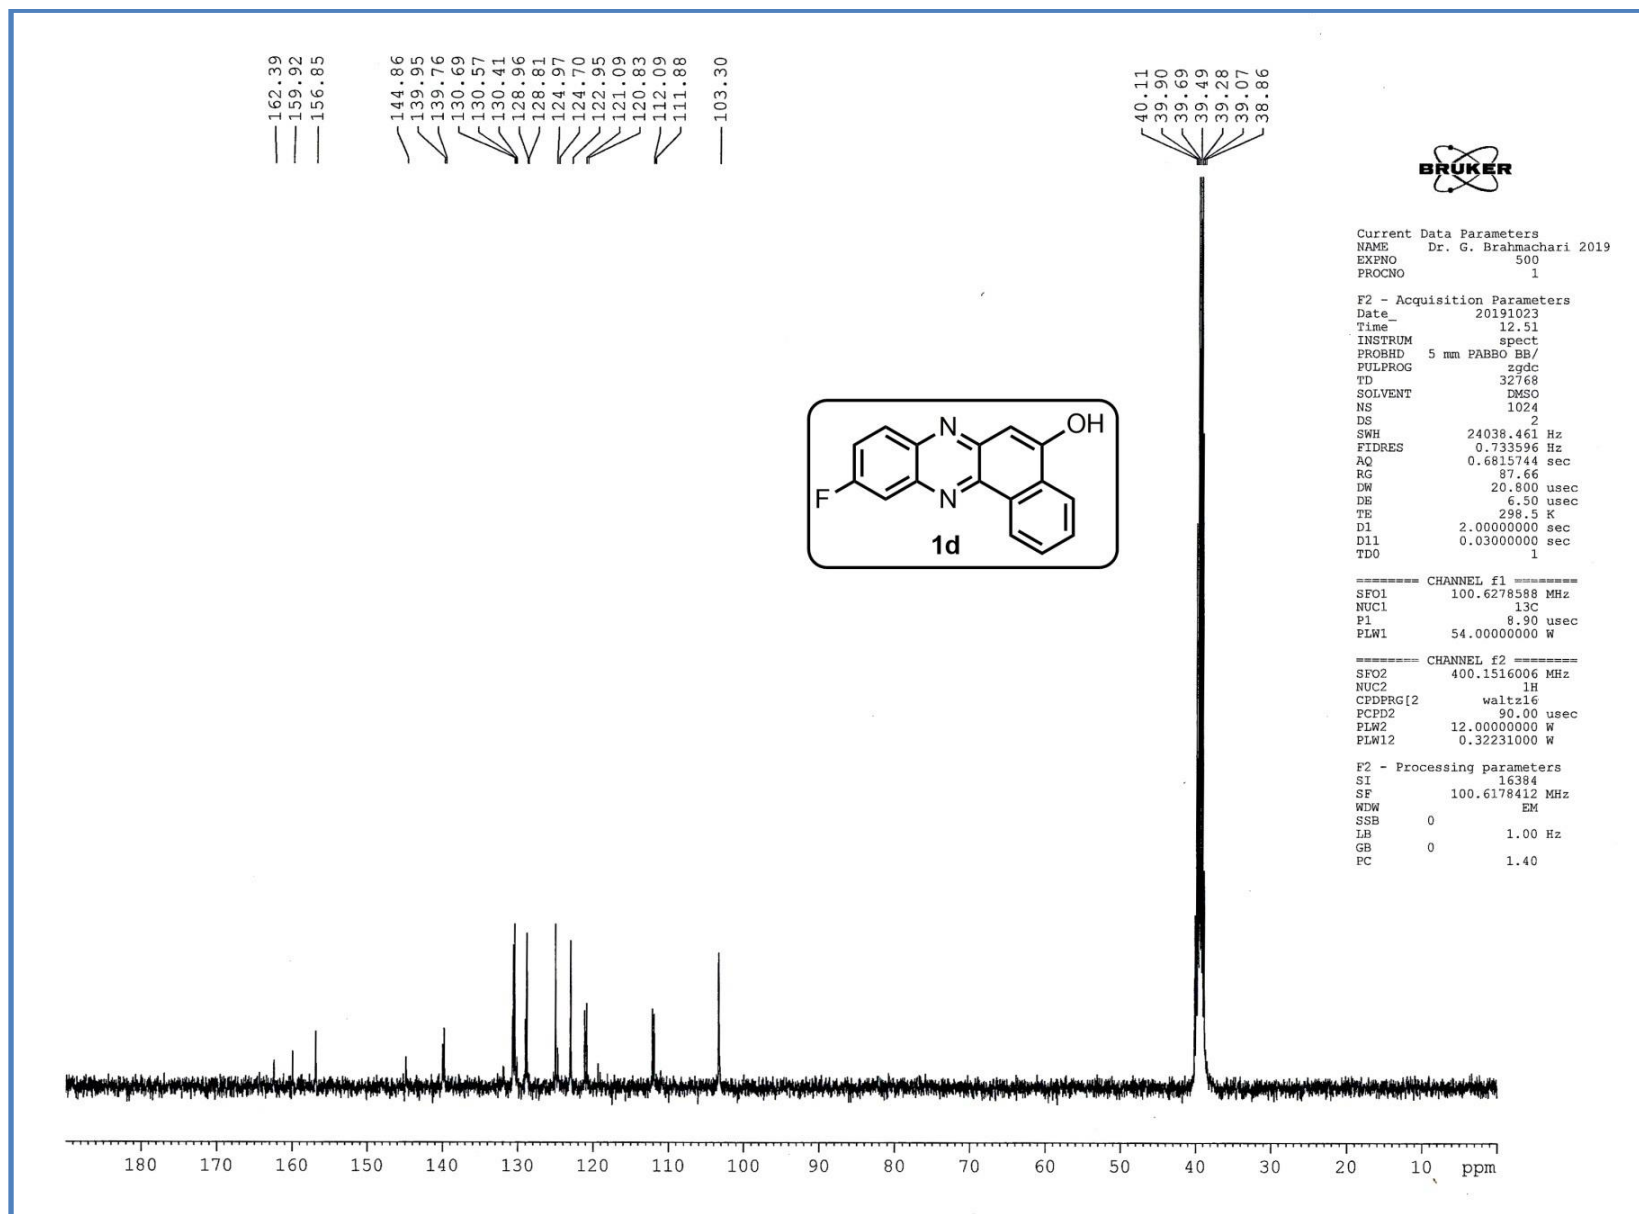

Figure S8. <sup>13</sup>C-NMR spectrum of 10-fluorobenzo[*a*]phenazin-5-ol (**1d**)

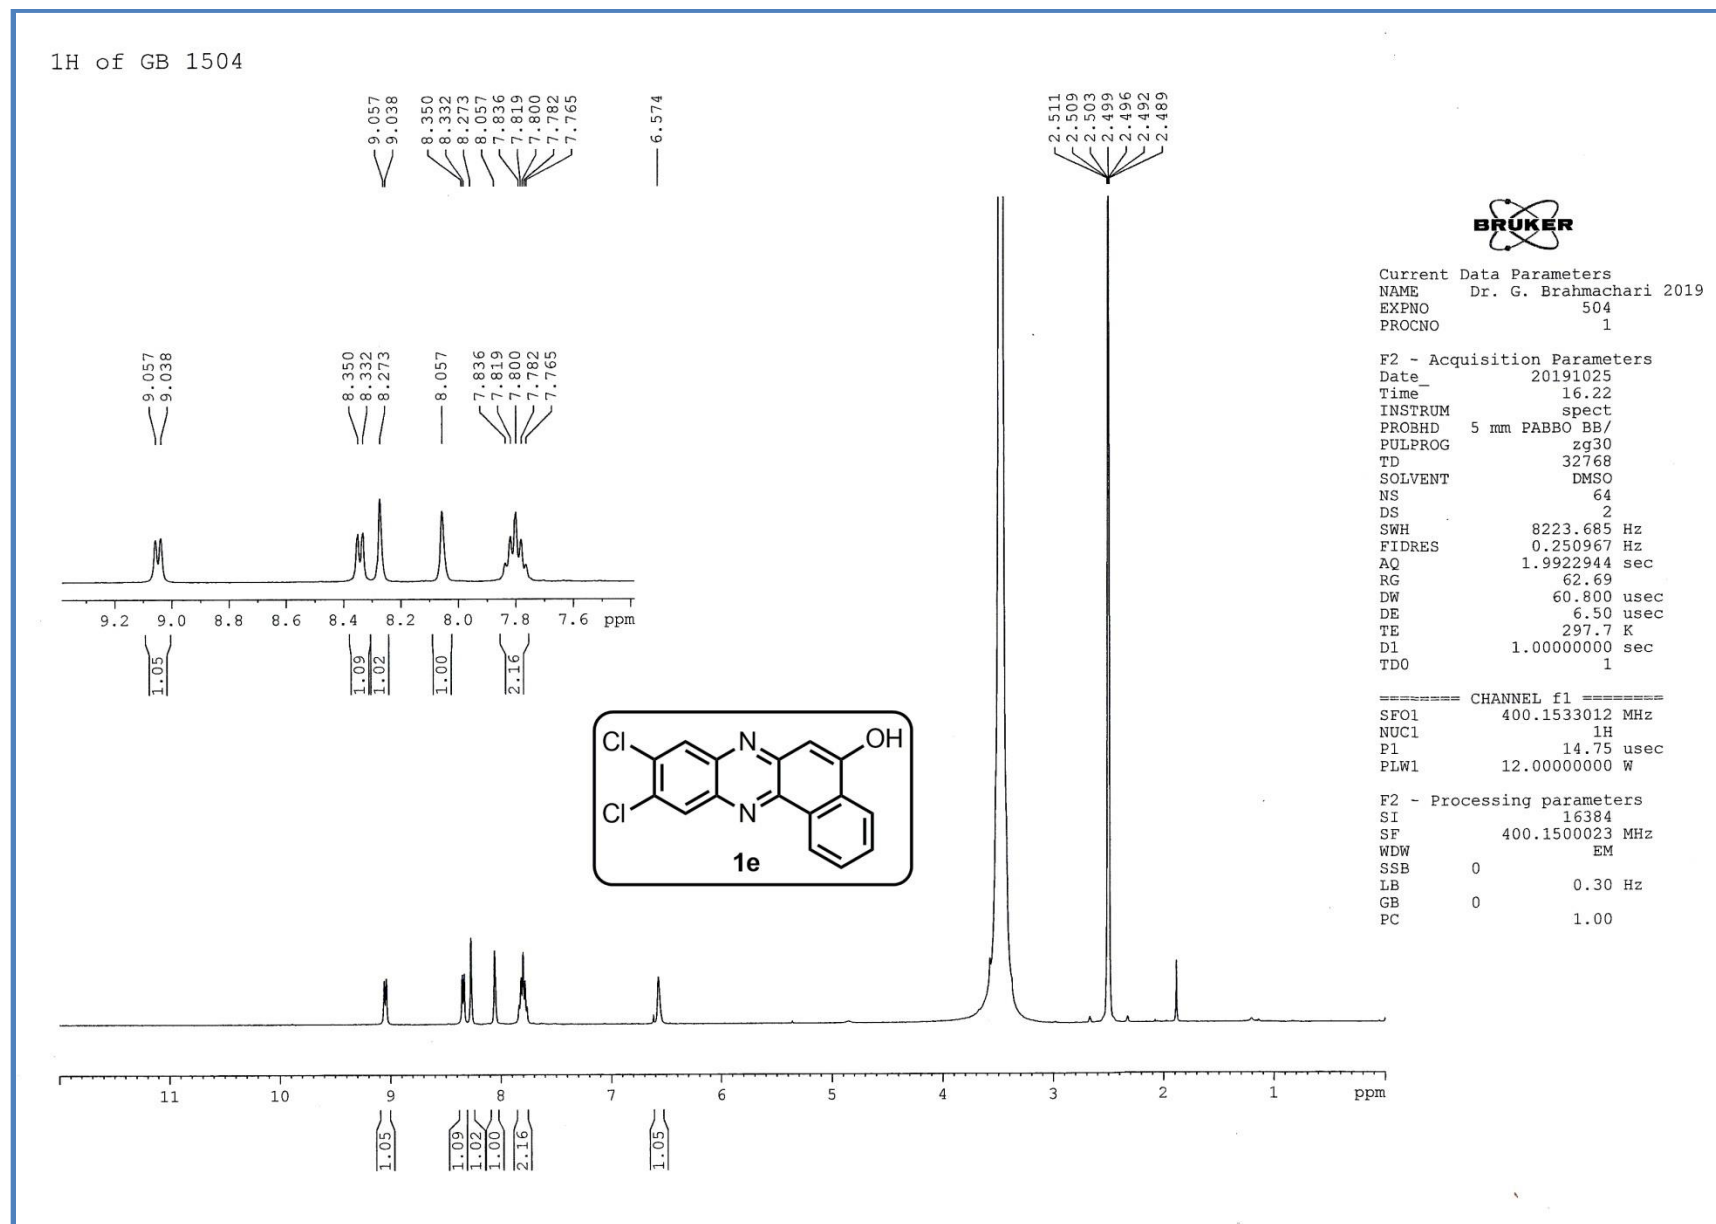

Figure S9. <sup>1</sup>H-NMR spectrum of 9,10-dichlorobenzo[*a*]phenazin-5-ol (**1e**)

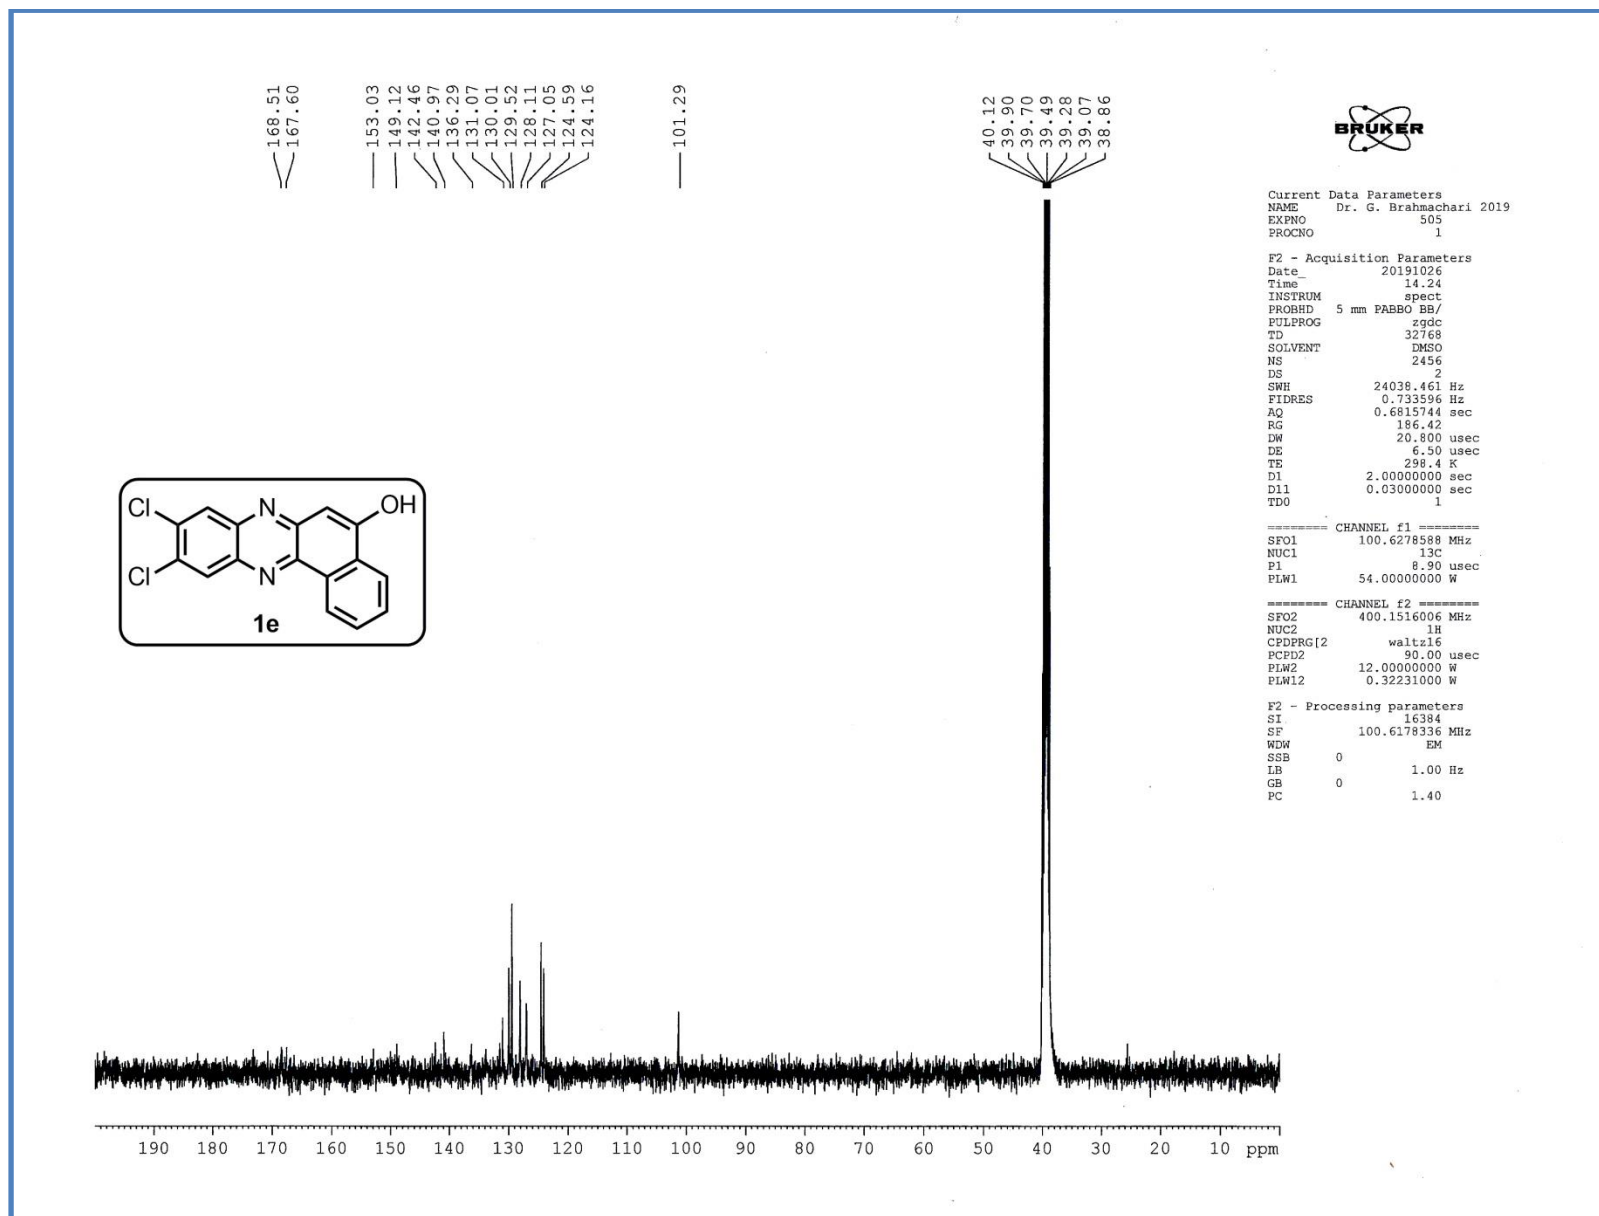

Figure S10. <sup>13</sup>C-NMR spectrum of 9,10-dichlorobenzo[a]phenazin-5-ol (**1e**)

5. Scanned copies of  $^1\text{H}$  NMR,  $^{13}\text{C}$  NMR, DEPT-135,  $^{77}\text{Se}$  NMR, 2D-NMR (for representative compound 3e, along with showing the corresponding homo- and hetero-nuclear interactions in Table S1) and HRMS spectra for all the synthesized benzo[*a*]phenazin-5-ols 3 (3a–3q) and 3' (3'a–3'e) (Figure S11 – S100)

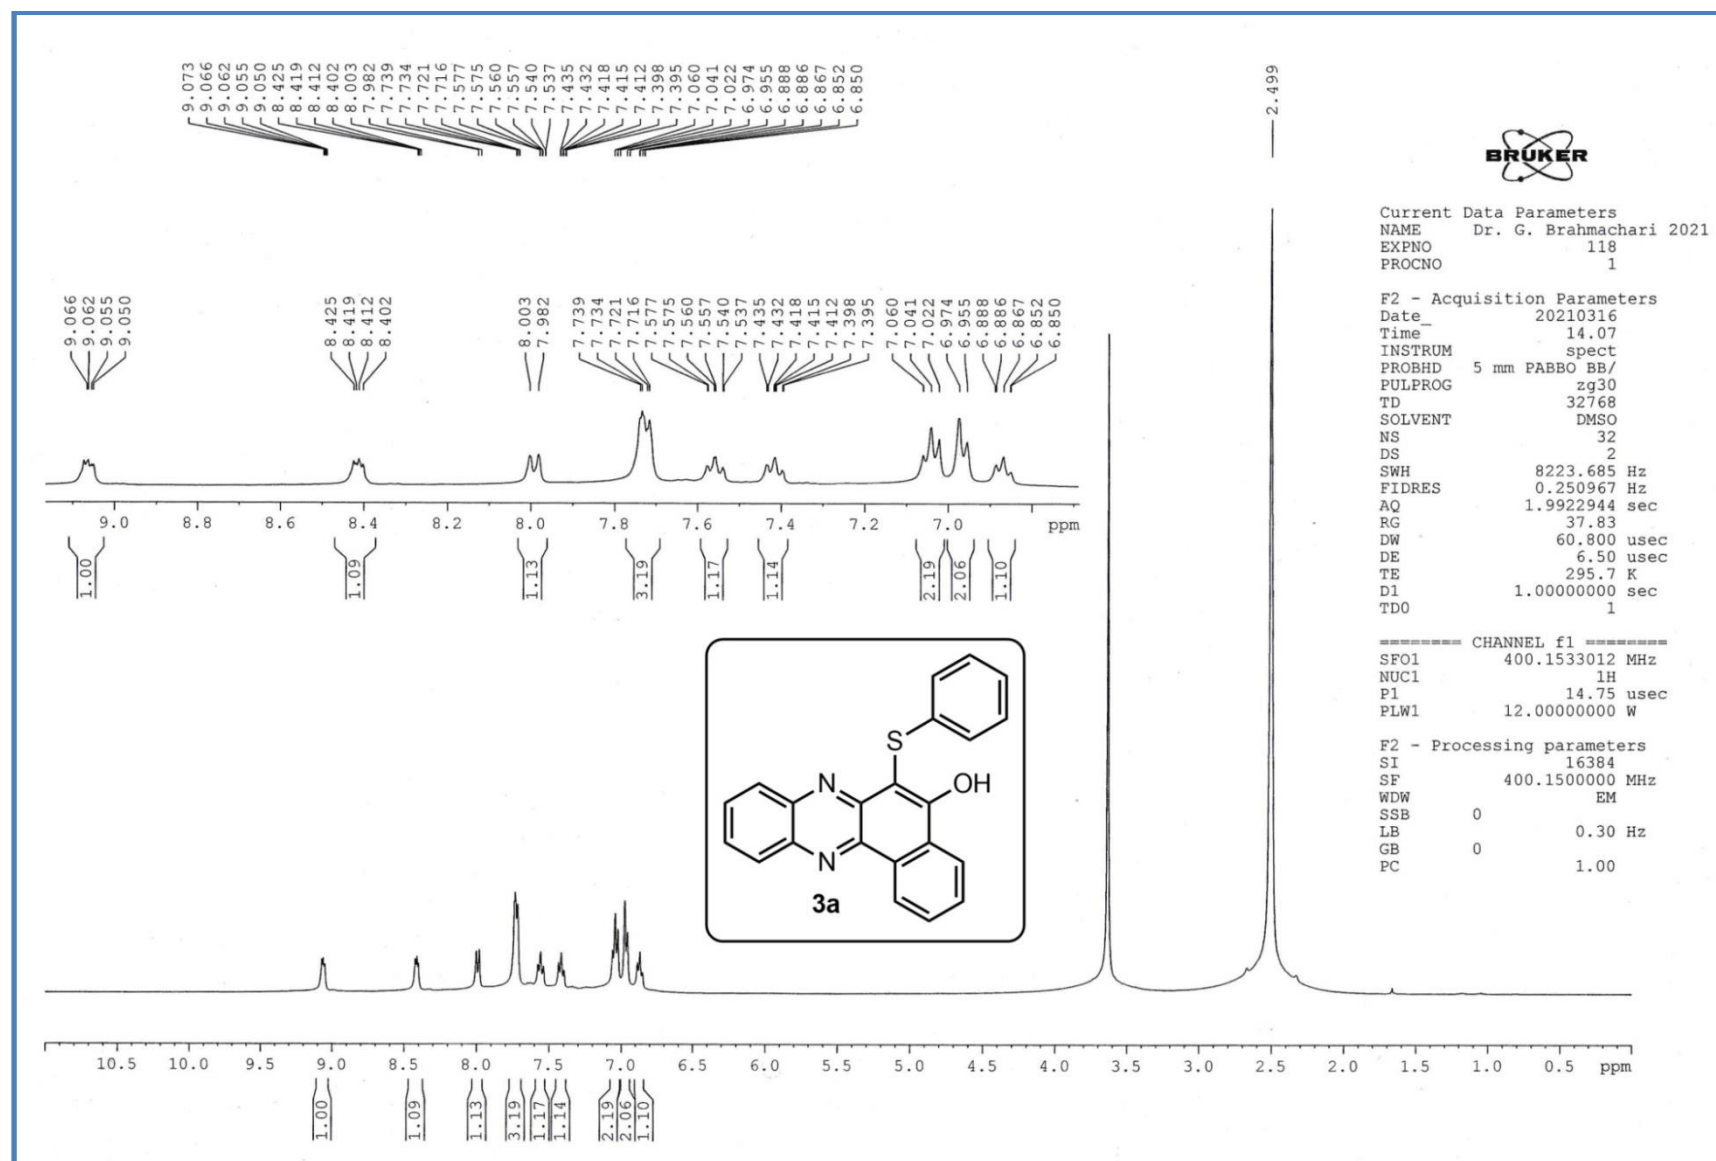

Figure S11.  $^1\text{H}$ -NMR spectrum of 6-(phenylthio)benzo[*a*]phenazin-5-ol (3a) [0.1 mmol scale]



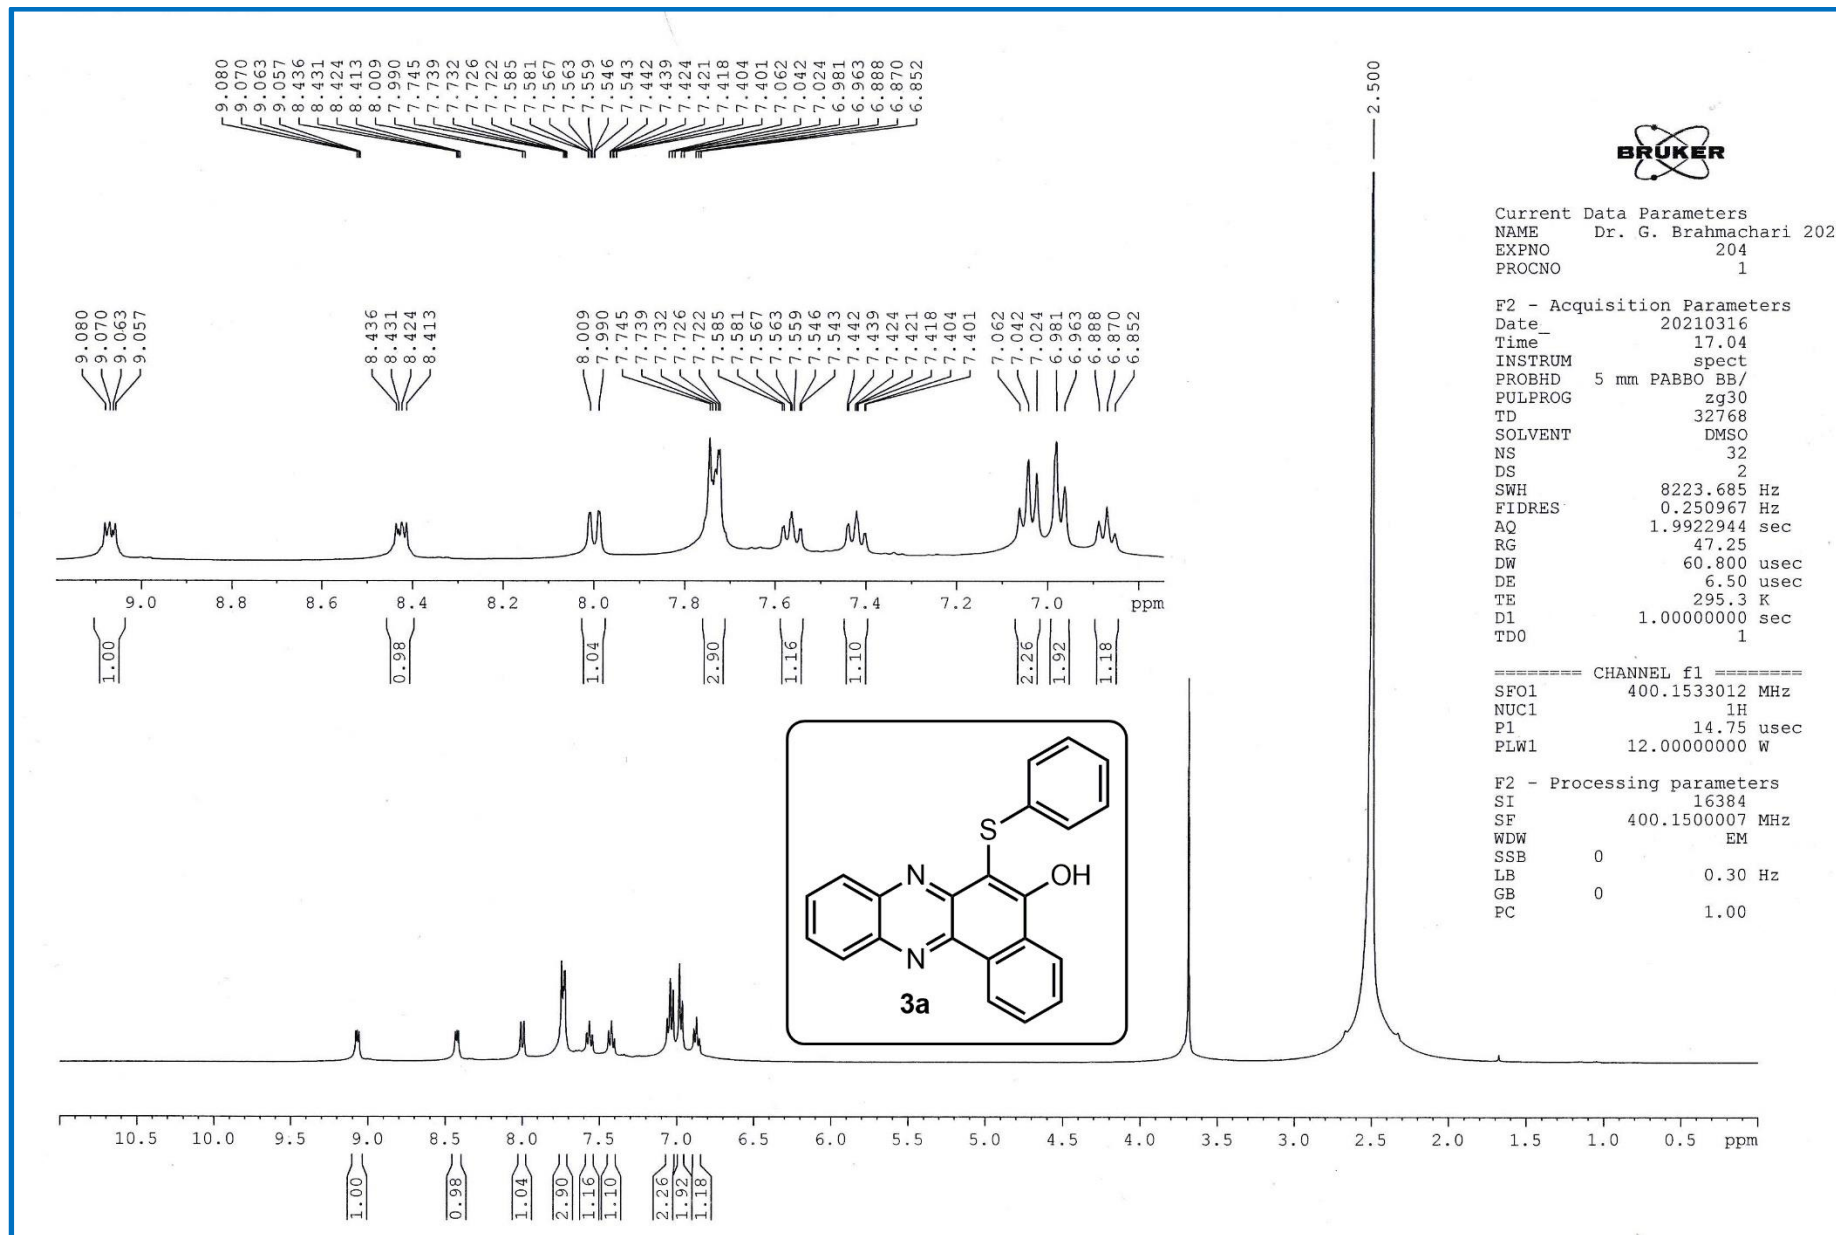

Figure S12. <sup>1</sup>H-NMR spectrum of 6-(phenylthio)benzo[*a*]phenazin-5-ol (**3a**) [1.0 mmol scale]

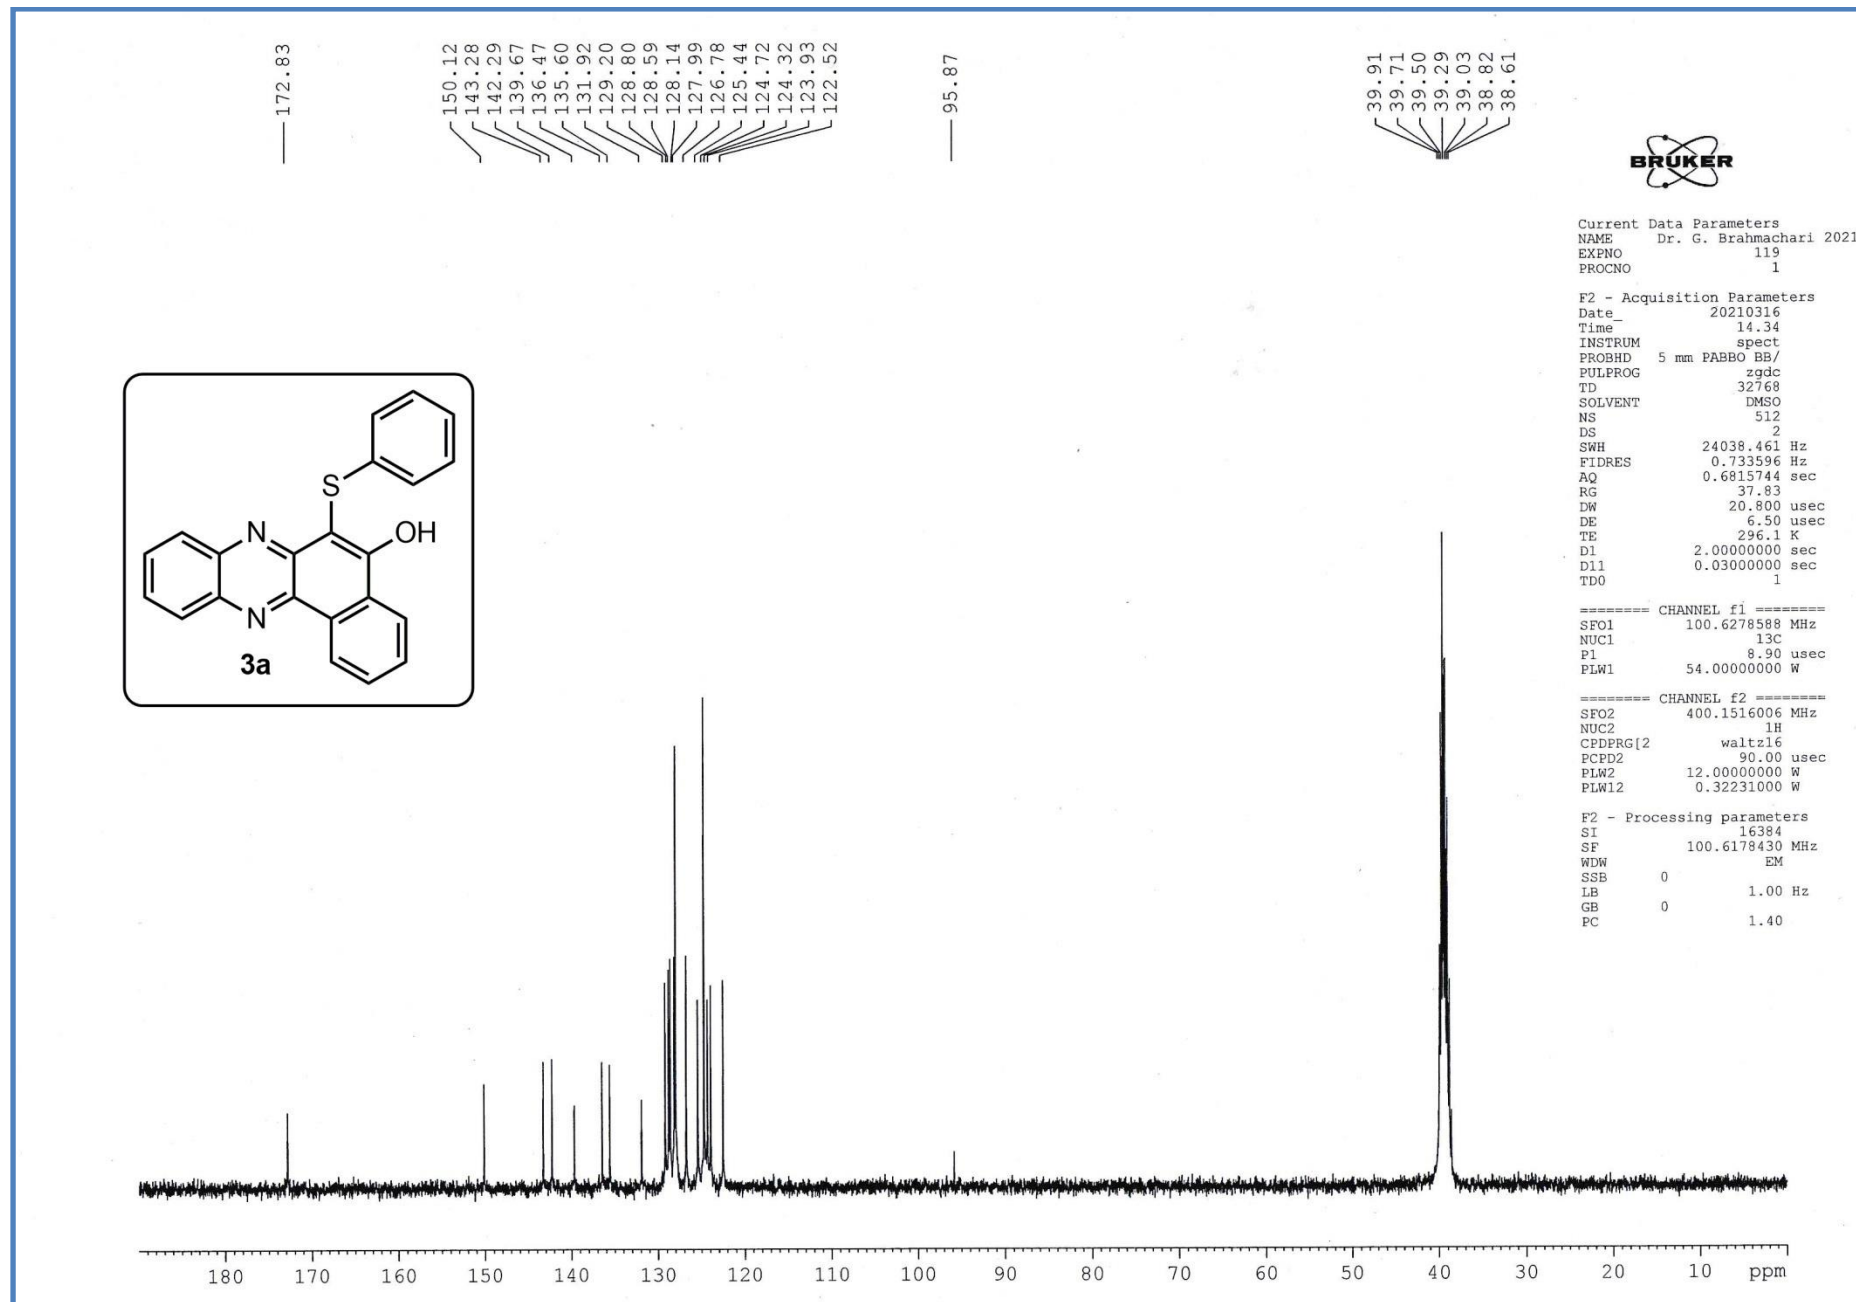

Figure S13. <sup>13</sup>C-NMR spectrum of 6-(phenylthio)benzo[a]phenazin-5-ol (**3a**)

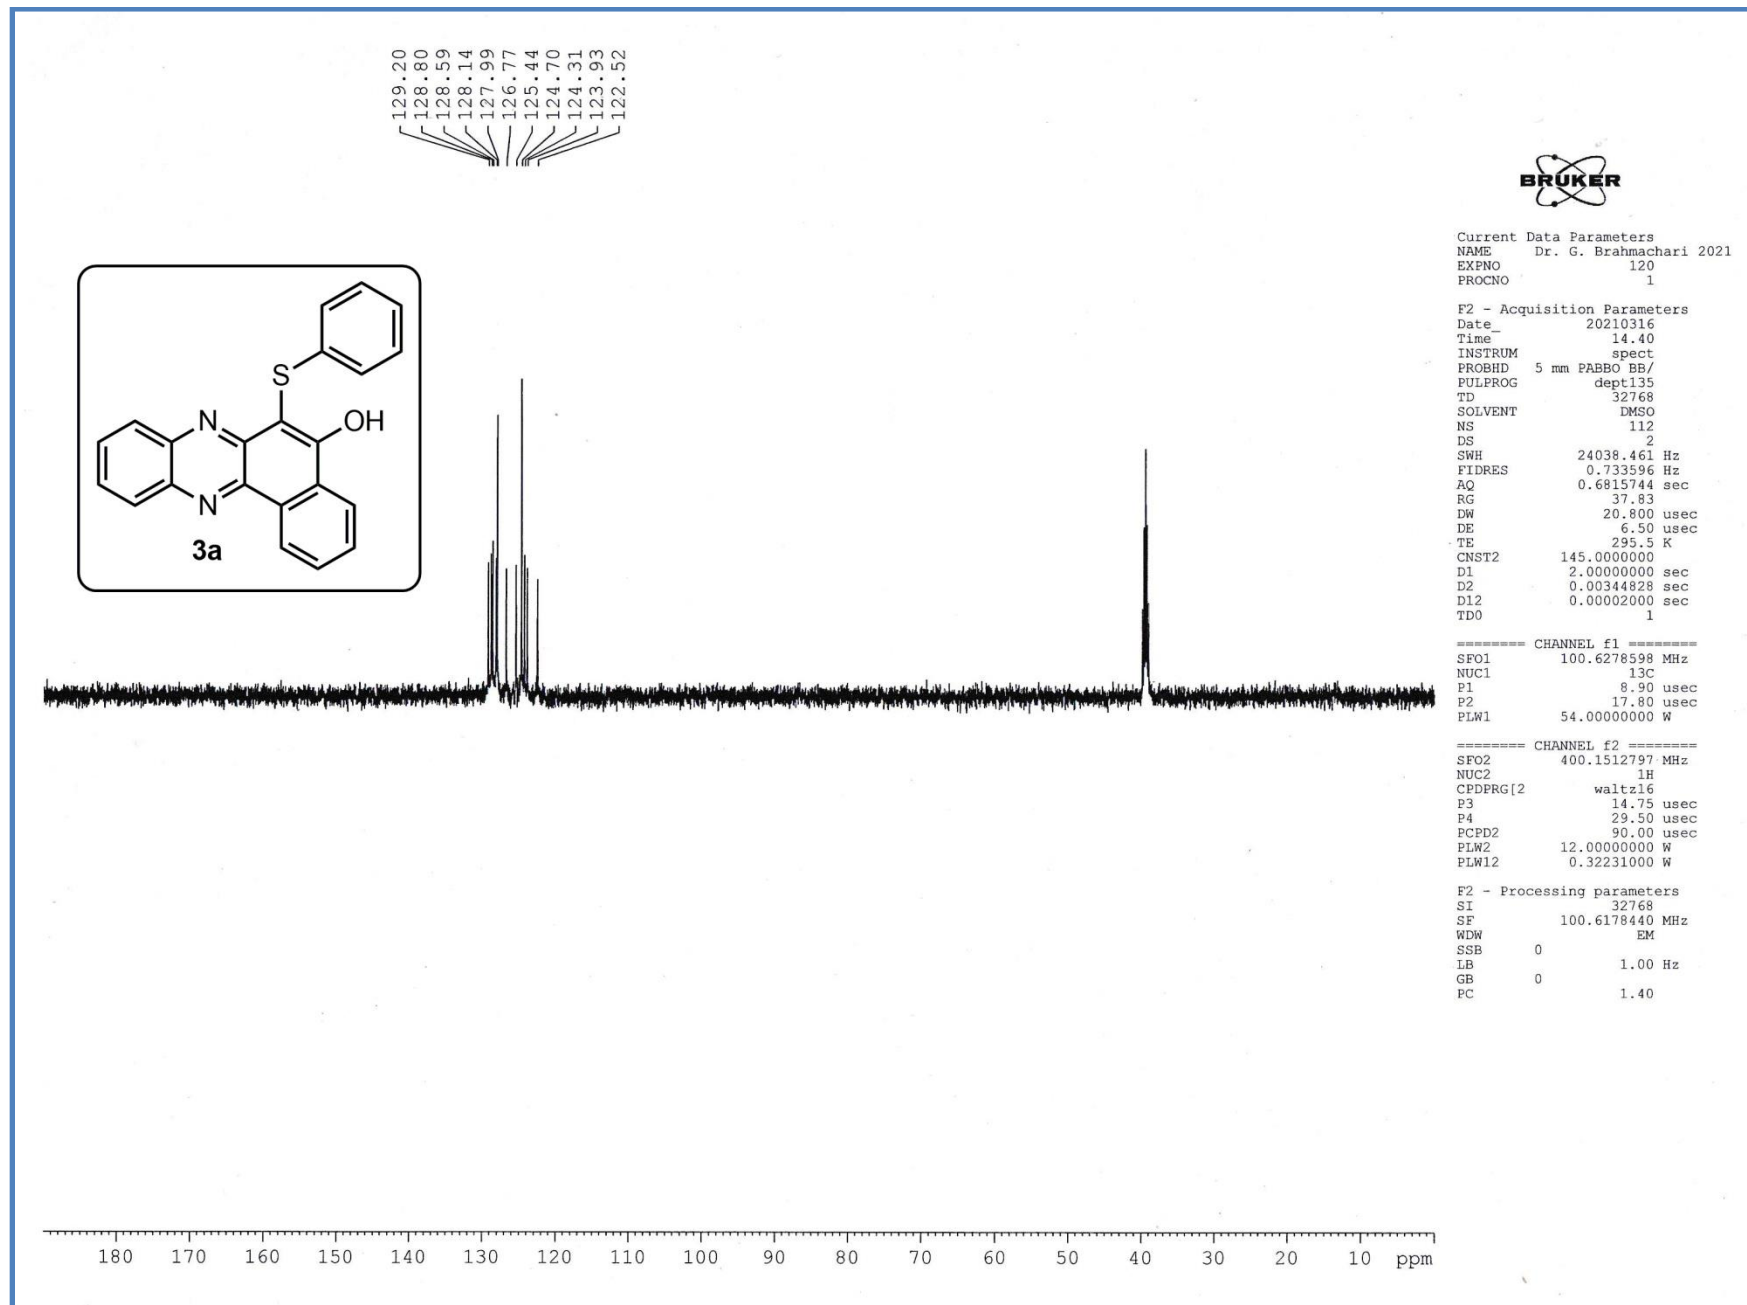

Figure S14. DEPT-135 NMR spectrum of 6-(phenylthio)benzo[a]phenazin-5-ol (**3a**)

## Display Report

### Analysis Info

Analysis Name D:\Data\User data\2019\JUNE\GB\_NH\_5\_2.d  
Method Tune\_pos\_Standard.m  
Sample Name GB\_NH\_5\_2  
Comment

Acquisition Date 6/25/2019 2:09:45 PM  
Operator IISER Kalyani  
Instrument maXis impact 8282001.00127

### Acquisition Parameter

|             |          |                      |          |                  |           |
|-------------|----------|----------------------|----------|------------------|-----------|
| Source Type | ESI      | Ion Polarity         | Positive | Set Nebulizer    | 0.3 Bar   |
| Focus       | Active   | Set Capillary        | 3400 V   | Set Dry Heater   | 200 °C    |
| Scan Begin  | 50 m/z   | Set End Plate Offset | -500 V   | Set Dry Gas      | 4.0 l/min |
| Scan End    | 1000 m/z | Set Charging Voltage | 2000 V   | Set Divert Valve | Source    |
|             |          | Set Corona           | 0 nA     | Set APCI Heater  | 0 °C      |

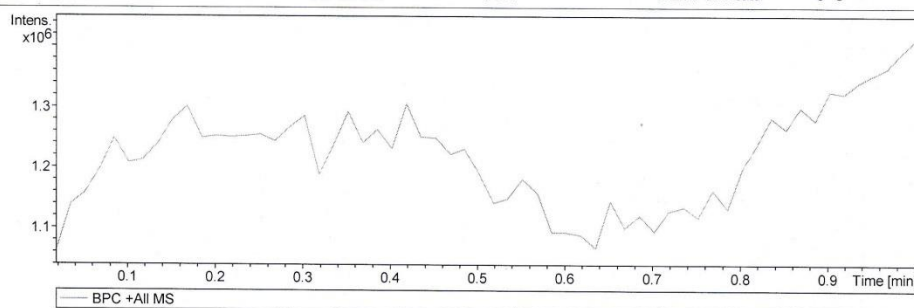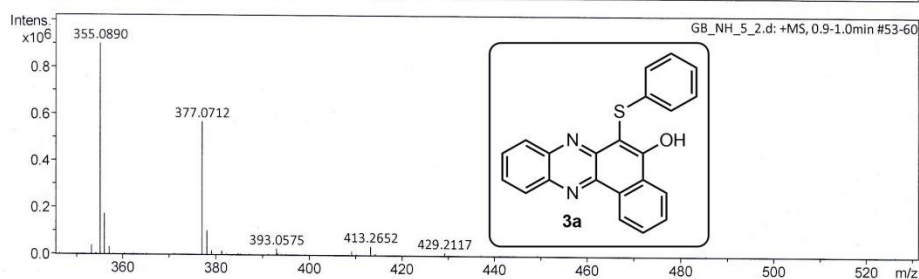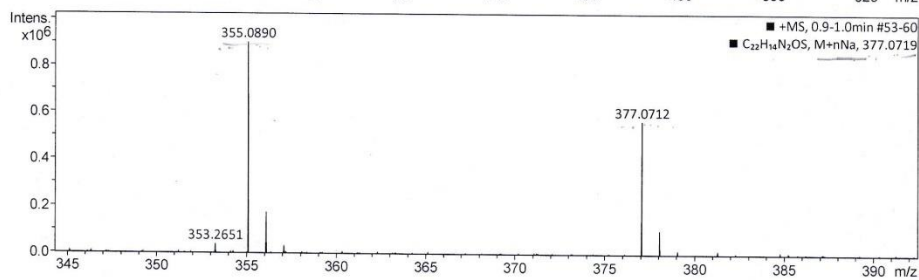

GB\_NH\_5\_2.d

Bruker Compass DataAnalysis 4.1

printed: 6/25/2019 2:21:08 PM

by: IISER Kalyani

Page 1 of 1

Figure S15. High-resolution Mass spectra of 6-(phenylthio)benzo[a]phenazin-5-ol (**3a**)

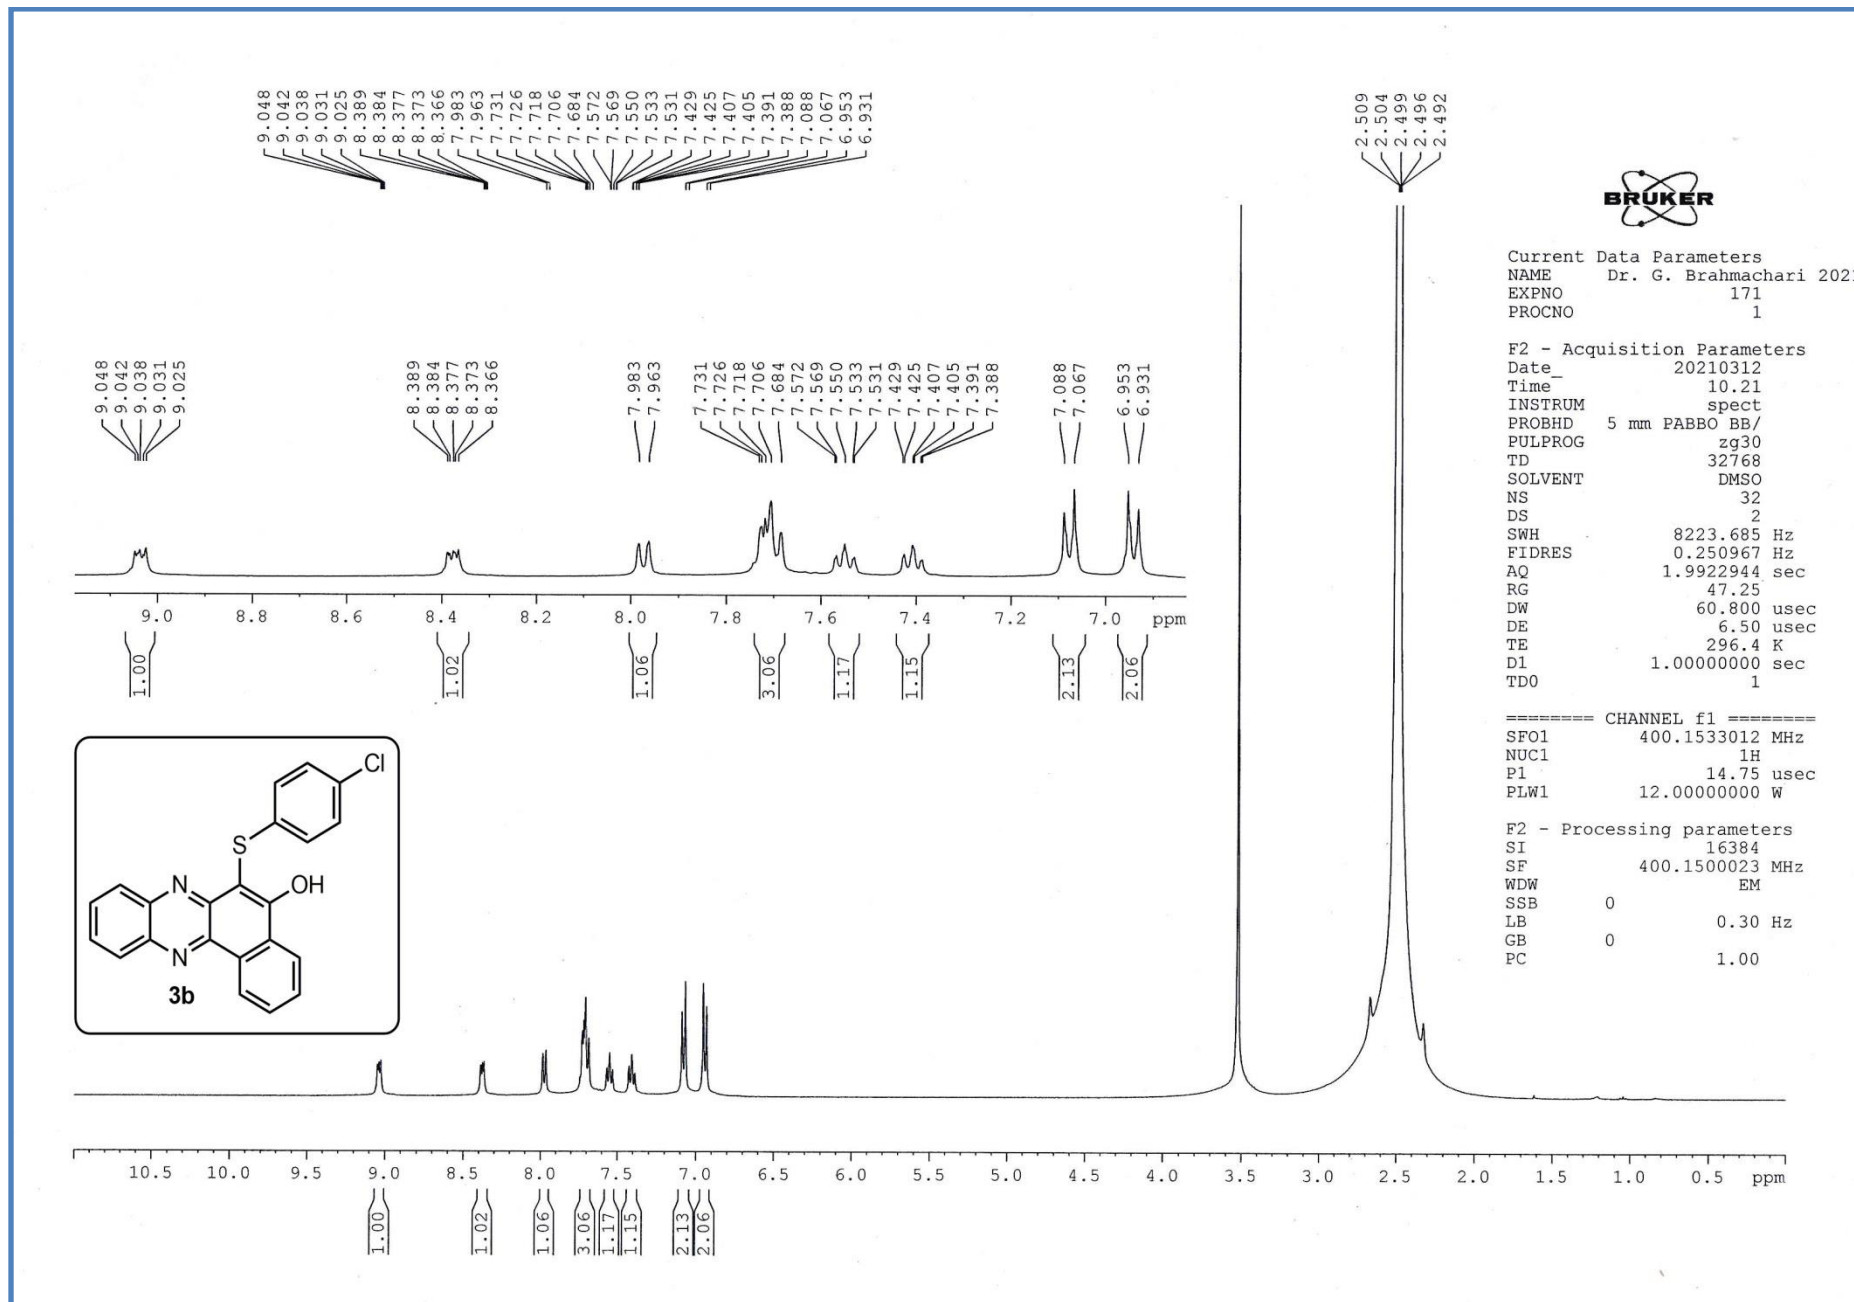

Figure S16. <sup>1</sup>H-NMR spectrum of 6-((4-chlorophenyl)thio)benzo[*a*]phenazin-5-ol (**3b**)

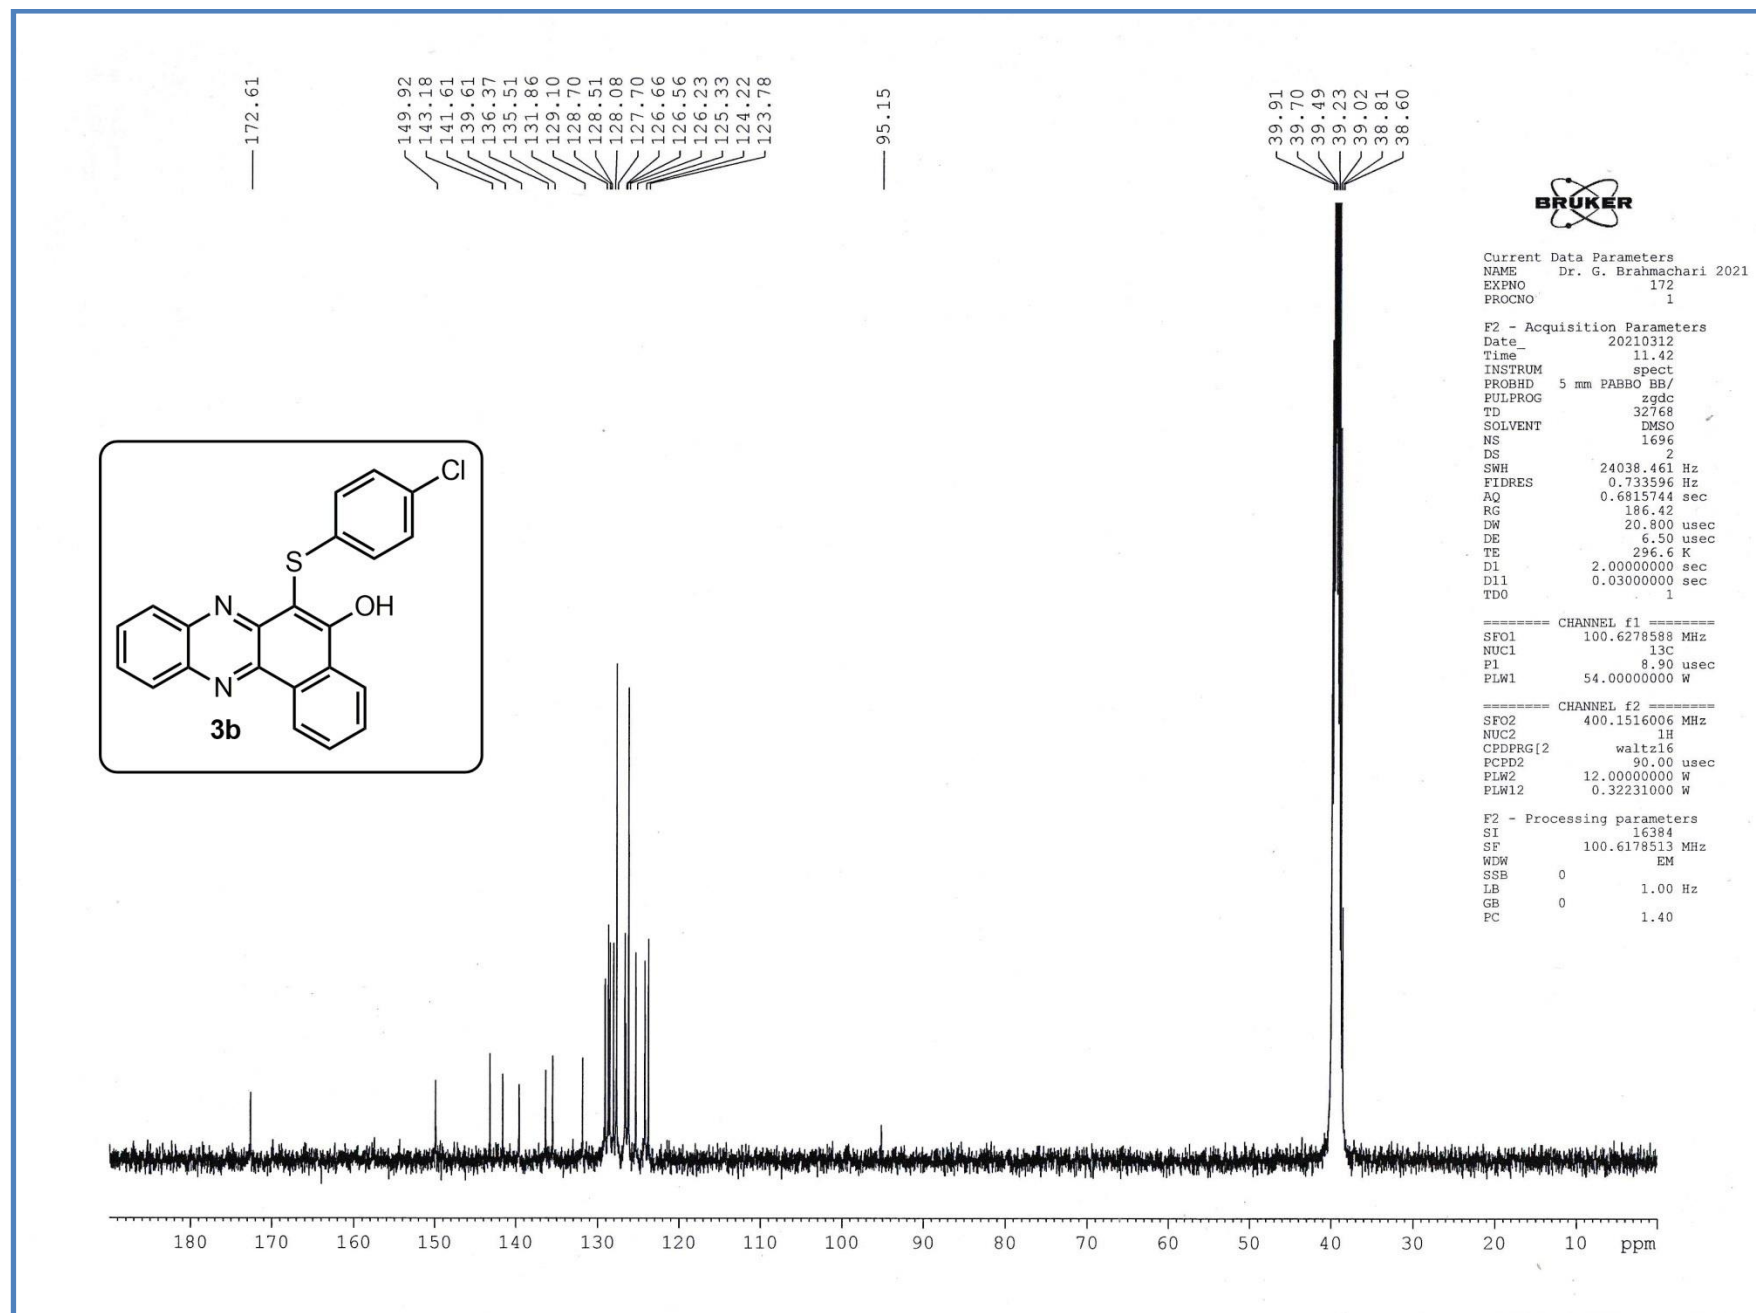

Figure S17. <sup>13</sup>C-NMR spectrum of 6-((4-chlorophenyl)thio)benzo[*a*]phenazin-5-ol (**3b**)

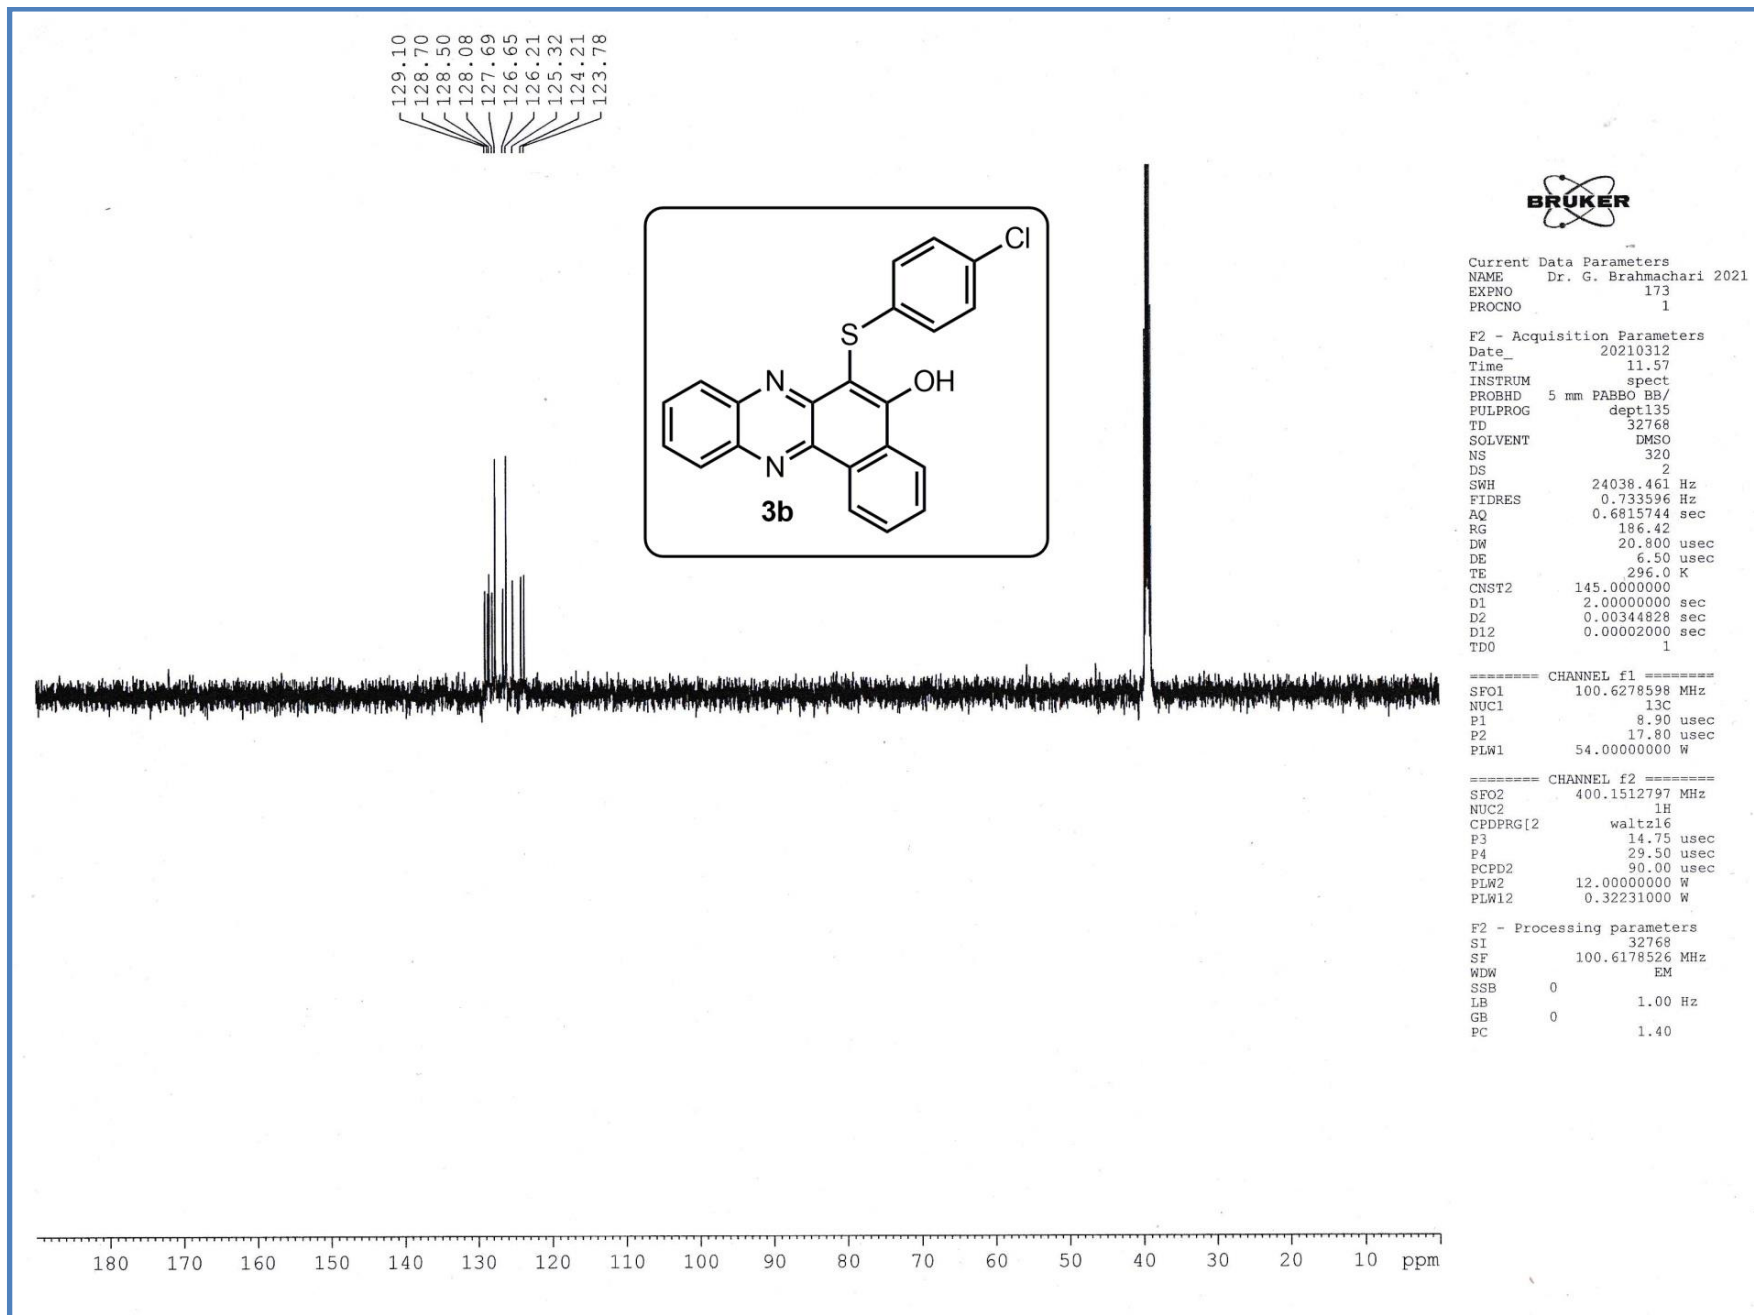

Figure S17. DEPT-135 NMR spectrum of 6-((4-chlorophenyl)thio)benzo[*a*]phenazin-5-ol (**3b**)

# User Spectrum Plot Report

|                |        |              |                           |         |                                    |
|----------------|--------|--------------|---------------------------|---------|------------------------------------|
| Name           | GB-1   | Rack Pos.    | Instrument                | ESI-MS  | Operator                           |
| Inj. Vol. (ul) | 2      | Plate Pos.   | IRM Status                | Success |                                    |
| Data File      | GB-1.d | Method (Acq) | ORGANIC METHODE.m Comment |         | Acq. Time (Local)                  |
|                |        |              |                           |         | 29-09-2021 14:01:52<br>(UTC+05:30) |

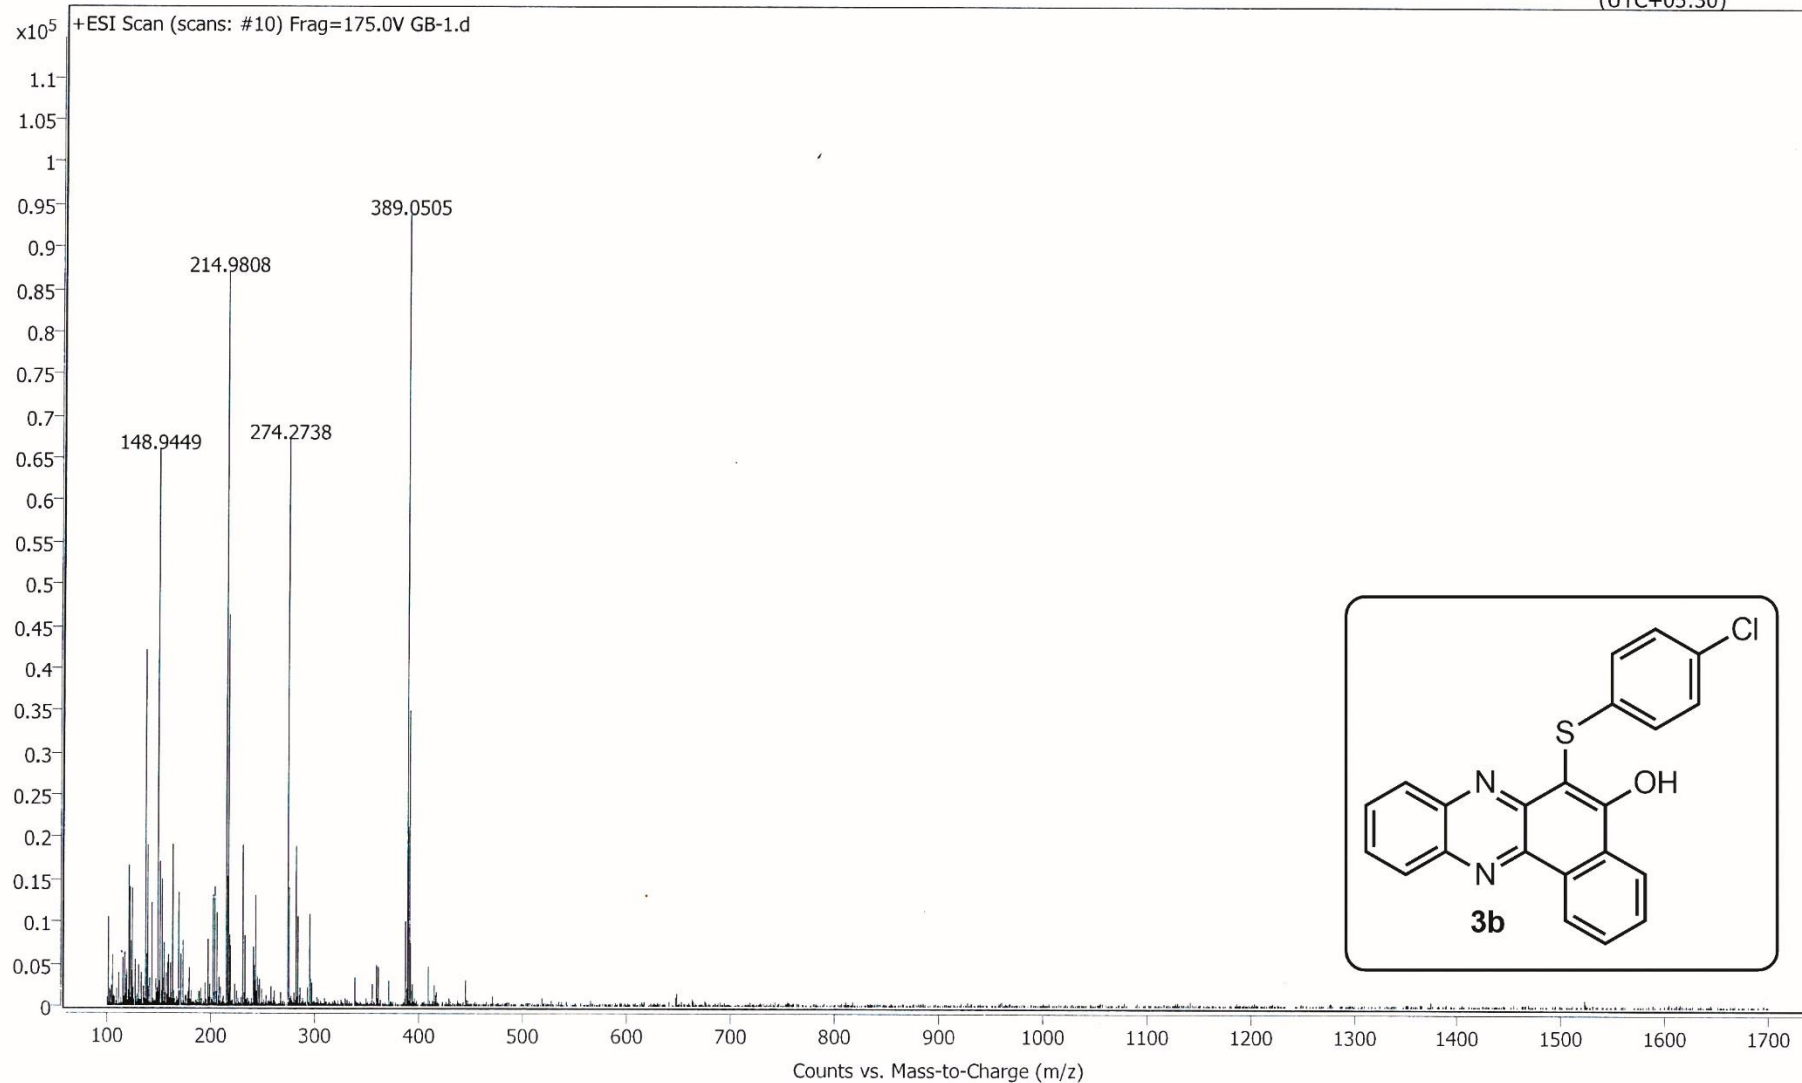

Figure S18. High-resolution Mass spectra of 6-((4-chlorophenyl)thio)benzo[*a*]phenazin-5-ol (**3b**)



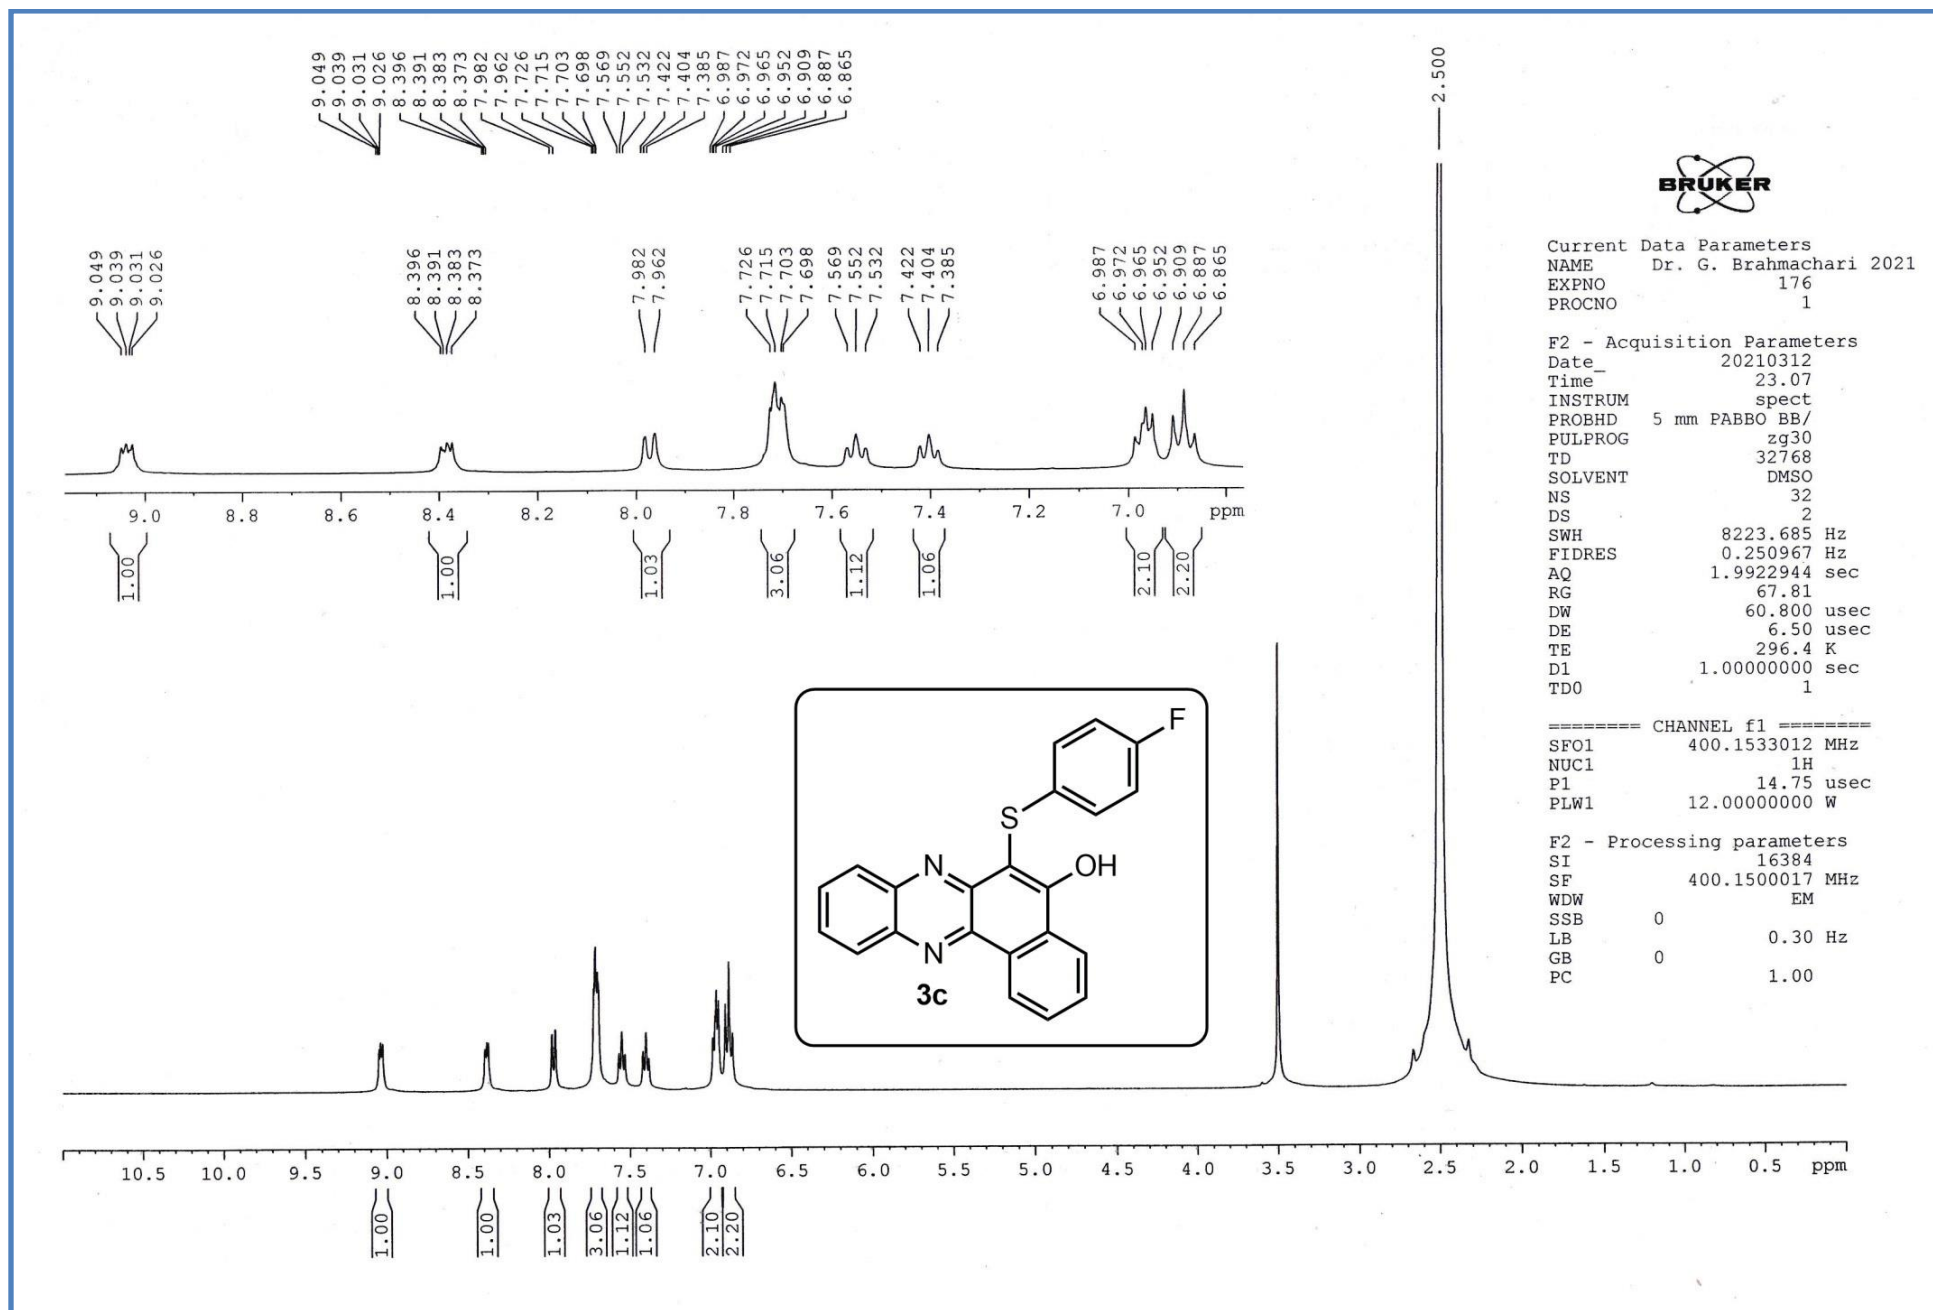

Figure S19. <sup>1</sup>H-NMR spectrum of 6-((4-fluorophenyl)thio)benzo[*a*]phenazin-5-ol (**3c**)

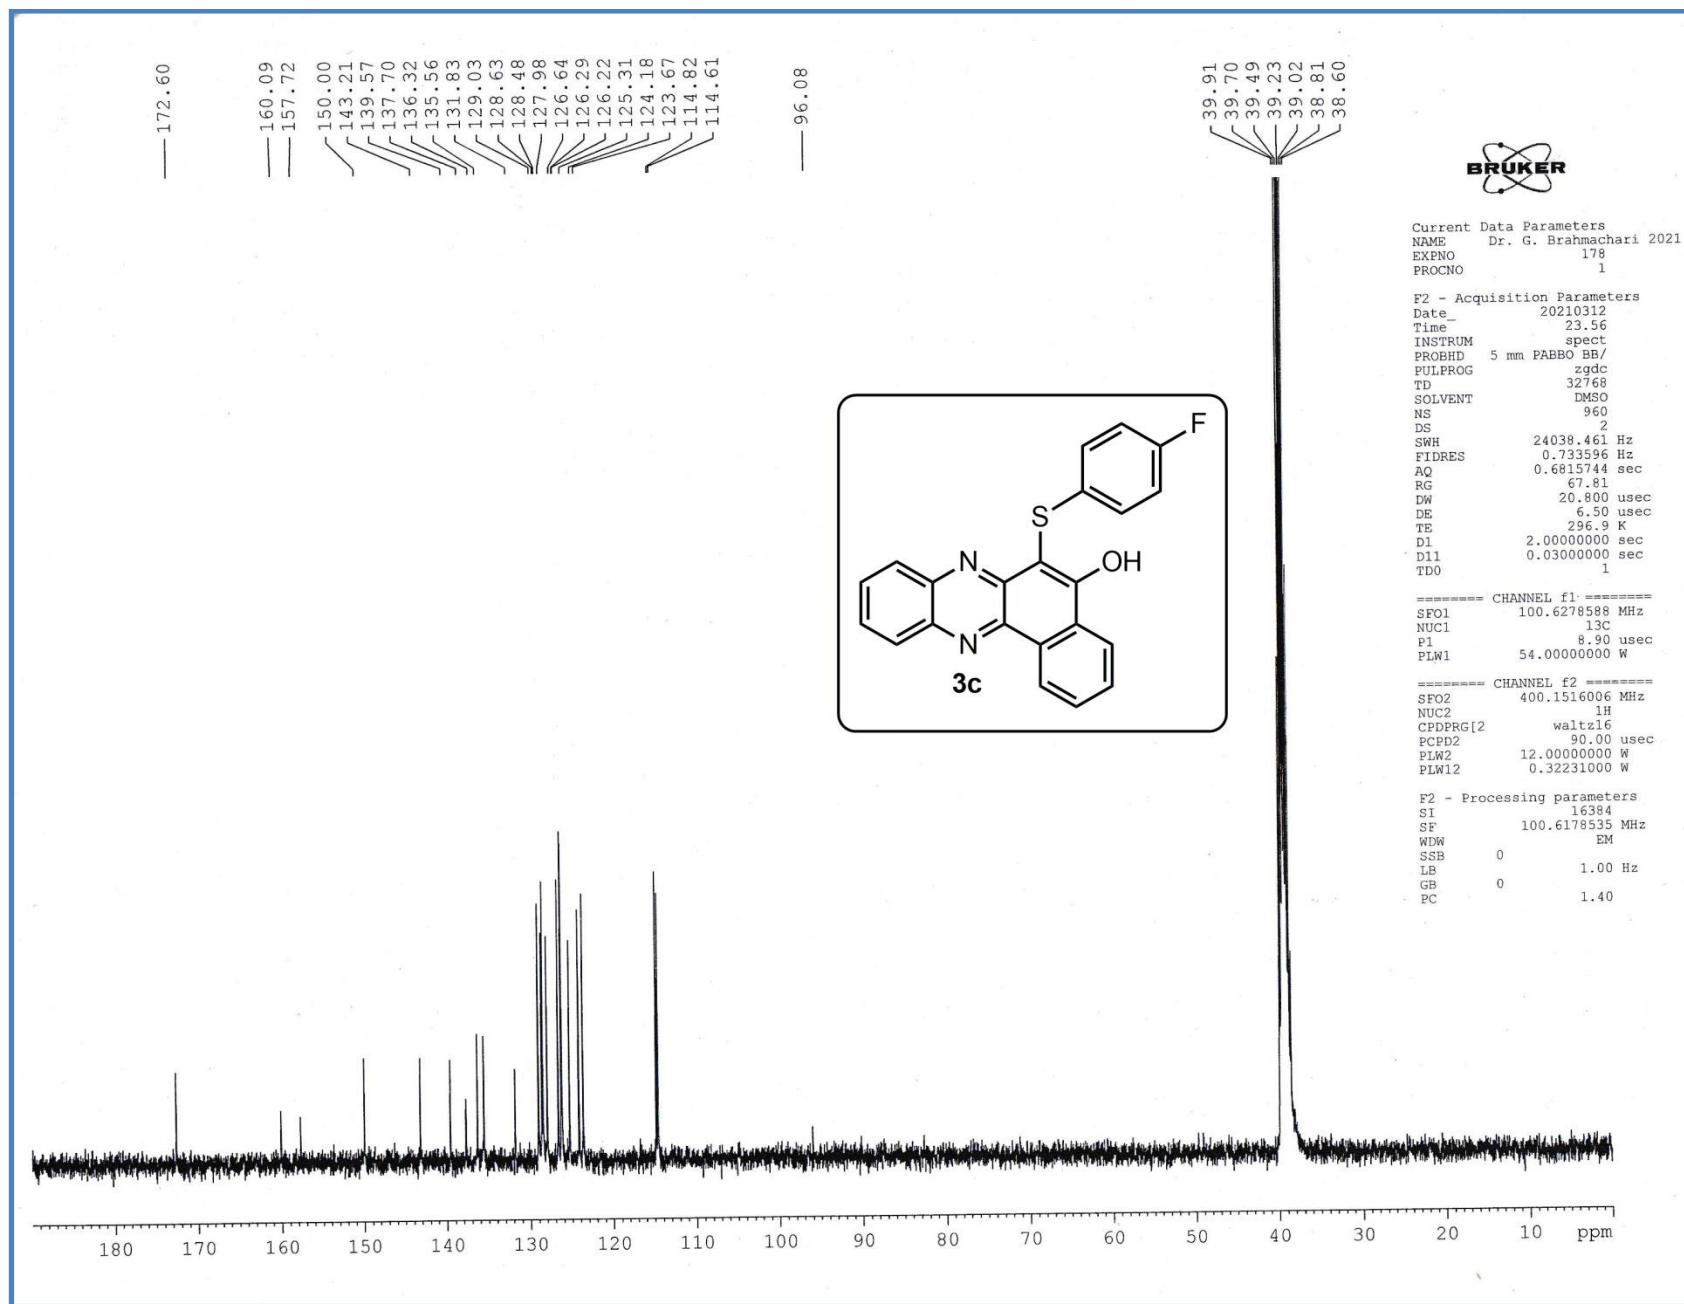

Figure S20. <sup>13</sup>C-NMR spectrum of 6-((4-fluorophenyl)thio)benzo[*a*]phenazin-5-ol (**3c**)

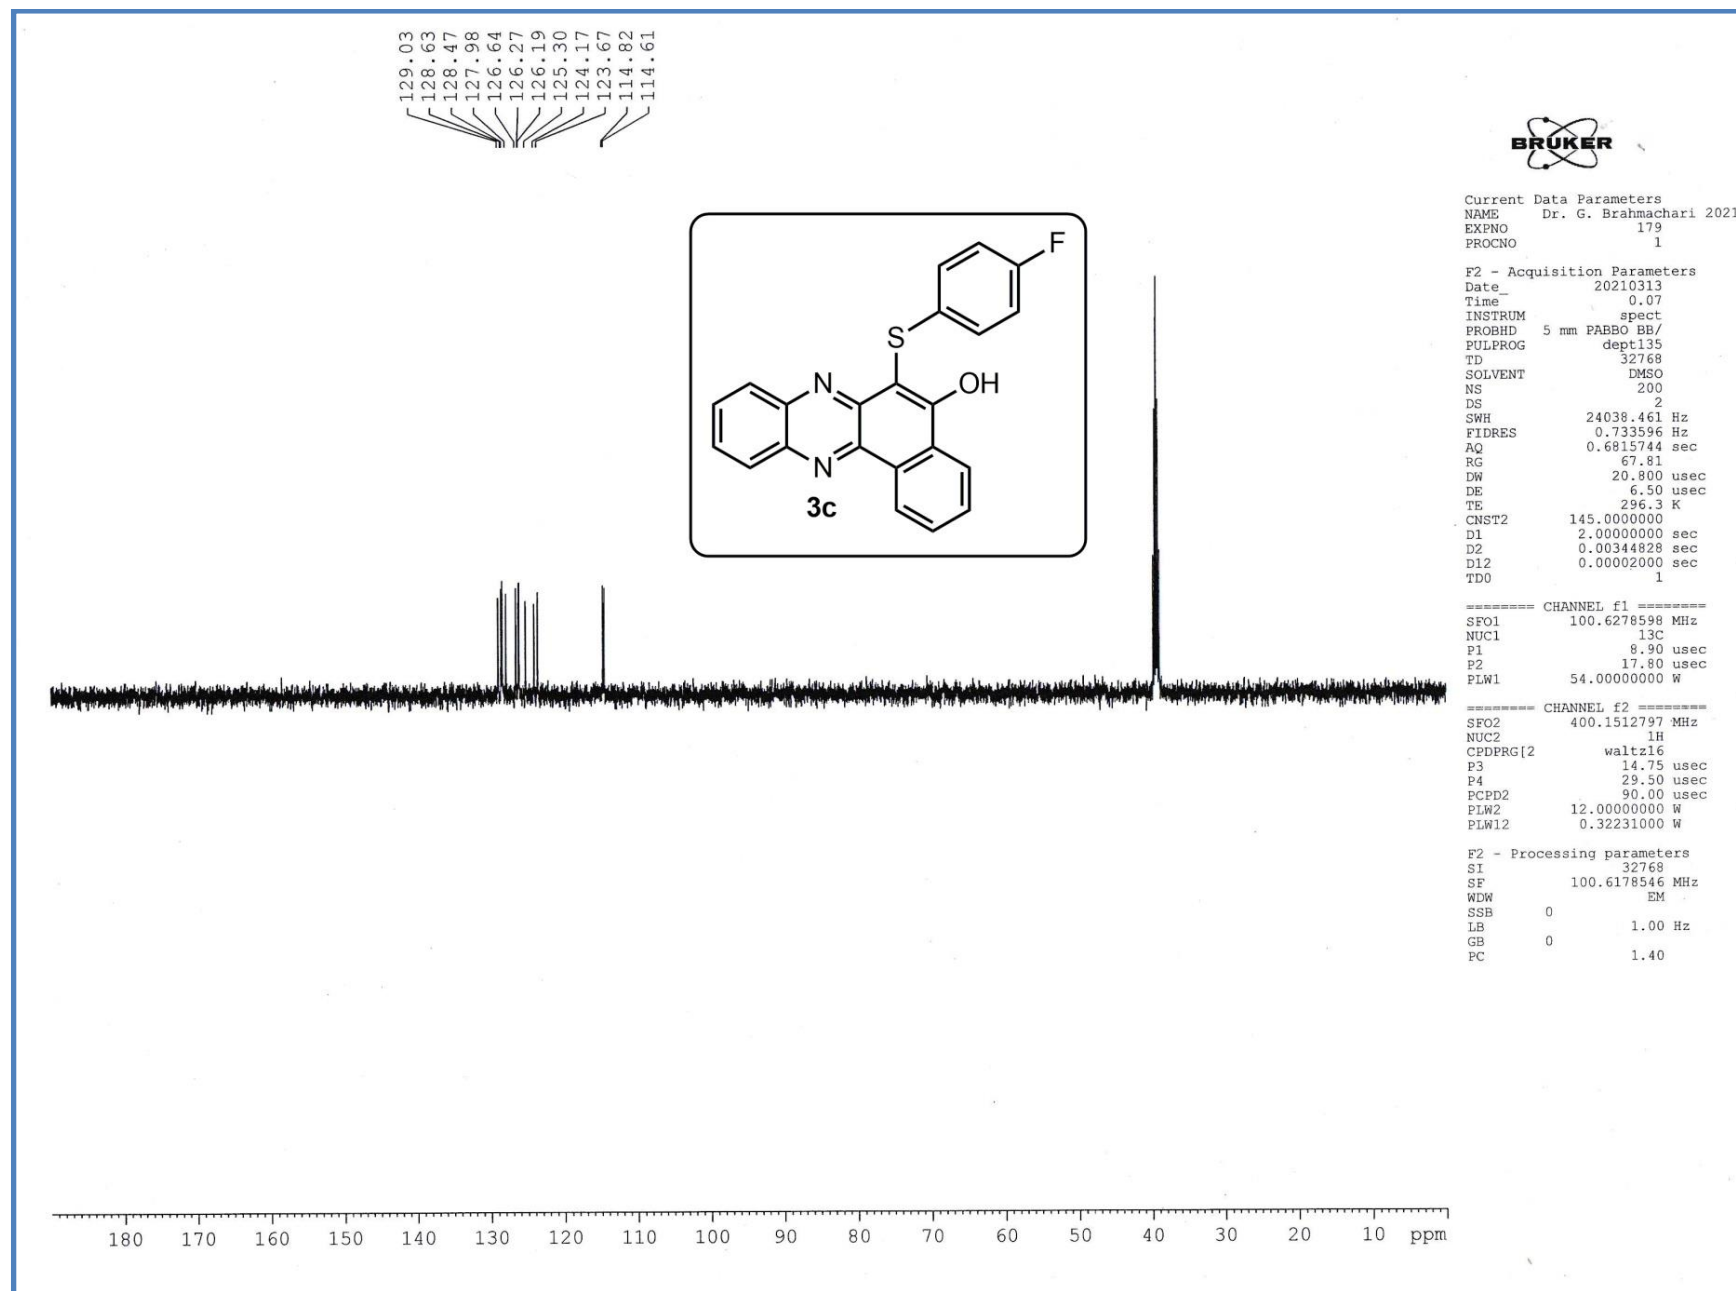

Figure S21. DEPT-135 NMR spectrum of 6-((4-fluorophenyl)thio)benzo[*a*]phenazin-5-ol (**3c**)

# User Spectrum Plot Report

|                |        |              |                           |         |                                 |
|----------------|--------|--------------|---------------------------|---------|---------------------------------|
| Name           | GB-2   | Rack Pos.    | Instrument                | ESI-MS  | Operator                        |
| Inj. Vol. (ul) | 2      | Plate Pos.   | IRM Status                | Success |                                 |
| Data File      | GB-2.d | Method (Acq) | ORGANIC METHODE.m Comment |         | Acq. Time (Local)               |
|                |        |              |                           |         | 29-09-2021 14:05:32 (UTC+05:30) |

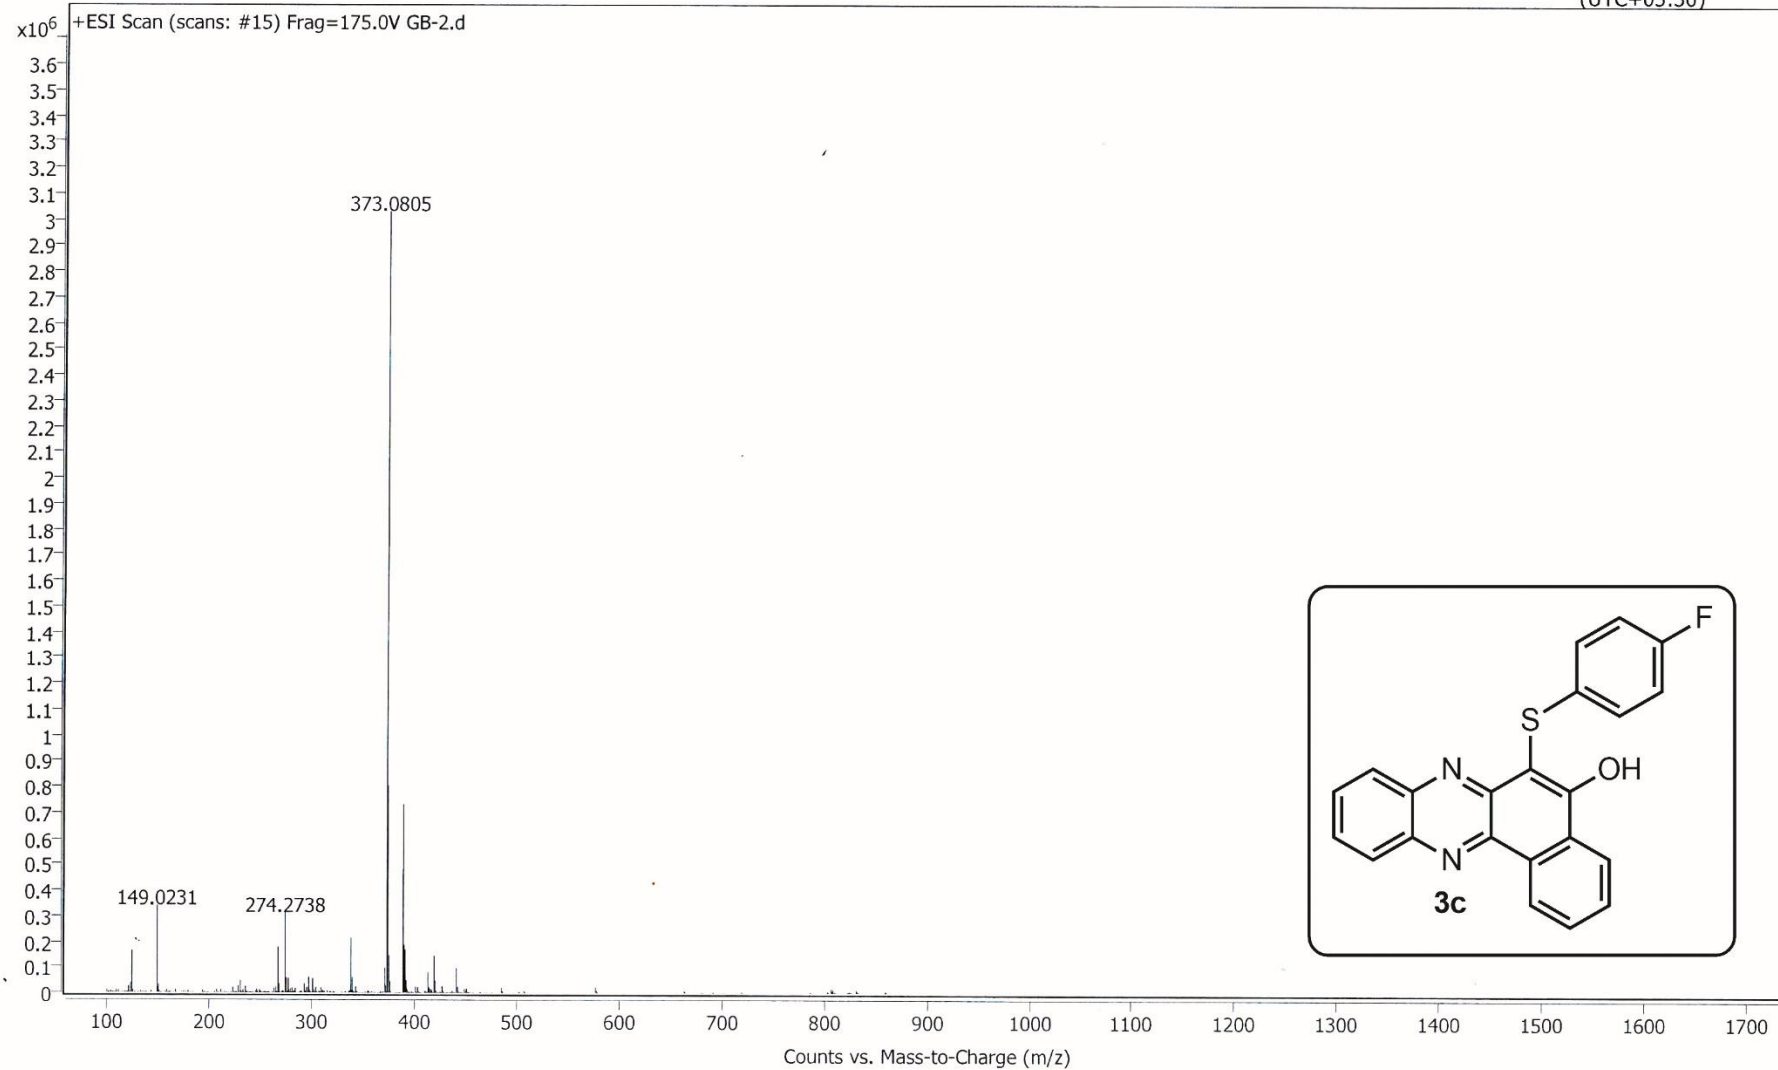

Figure S22. High-resolution Mass spectra of 6-((4-fluorophenyl)thio)benzo[*a*]phenazin-5-ol (**3c**)

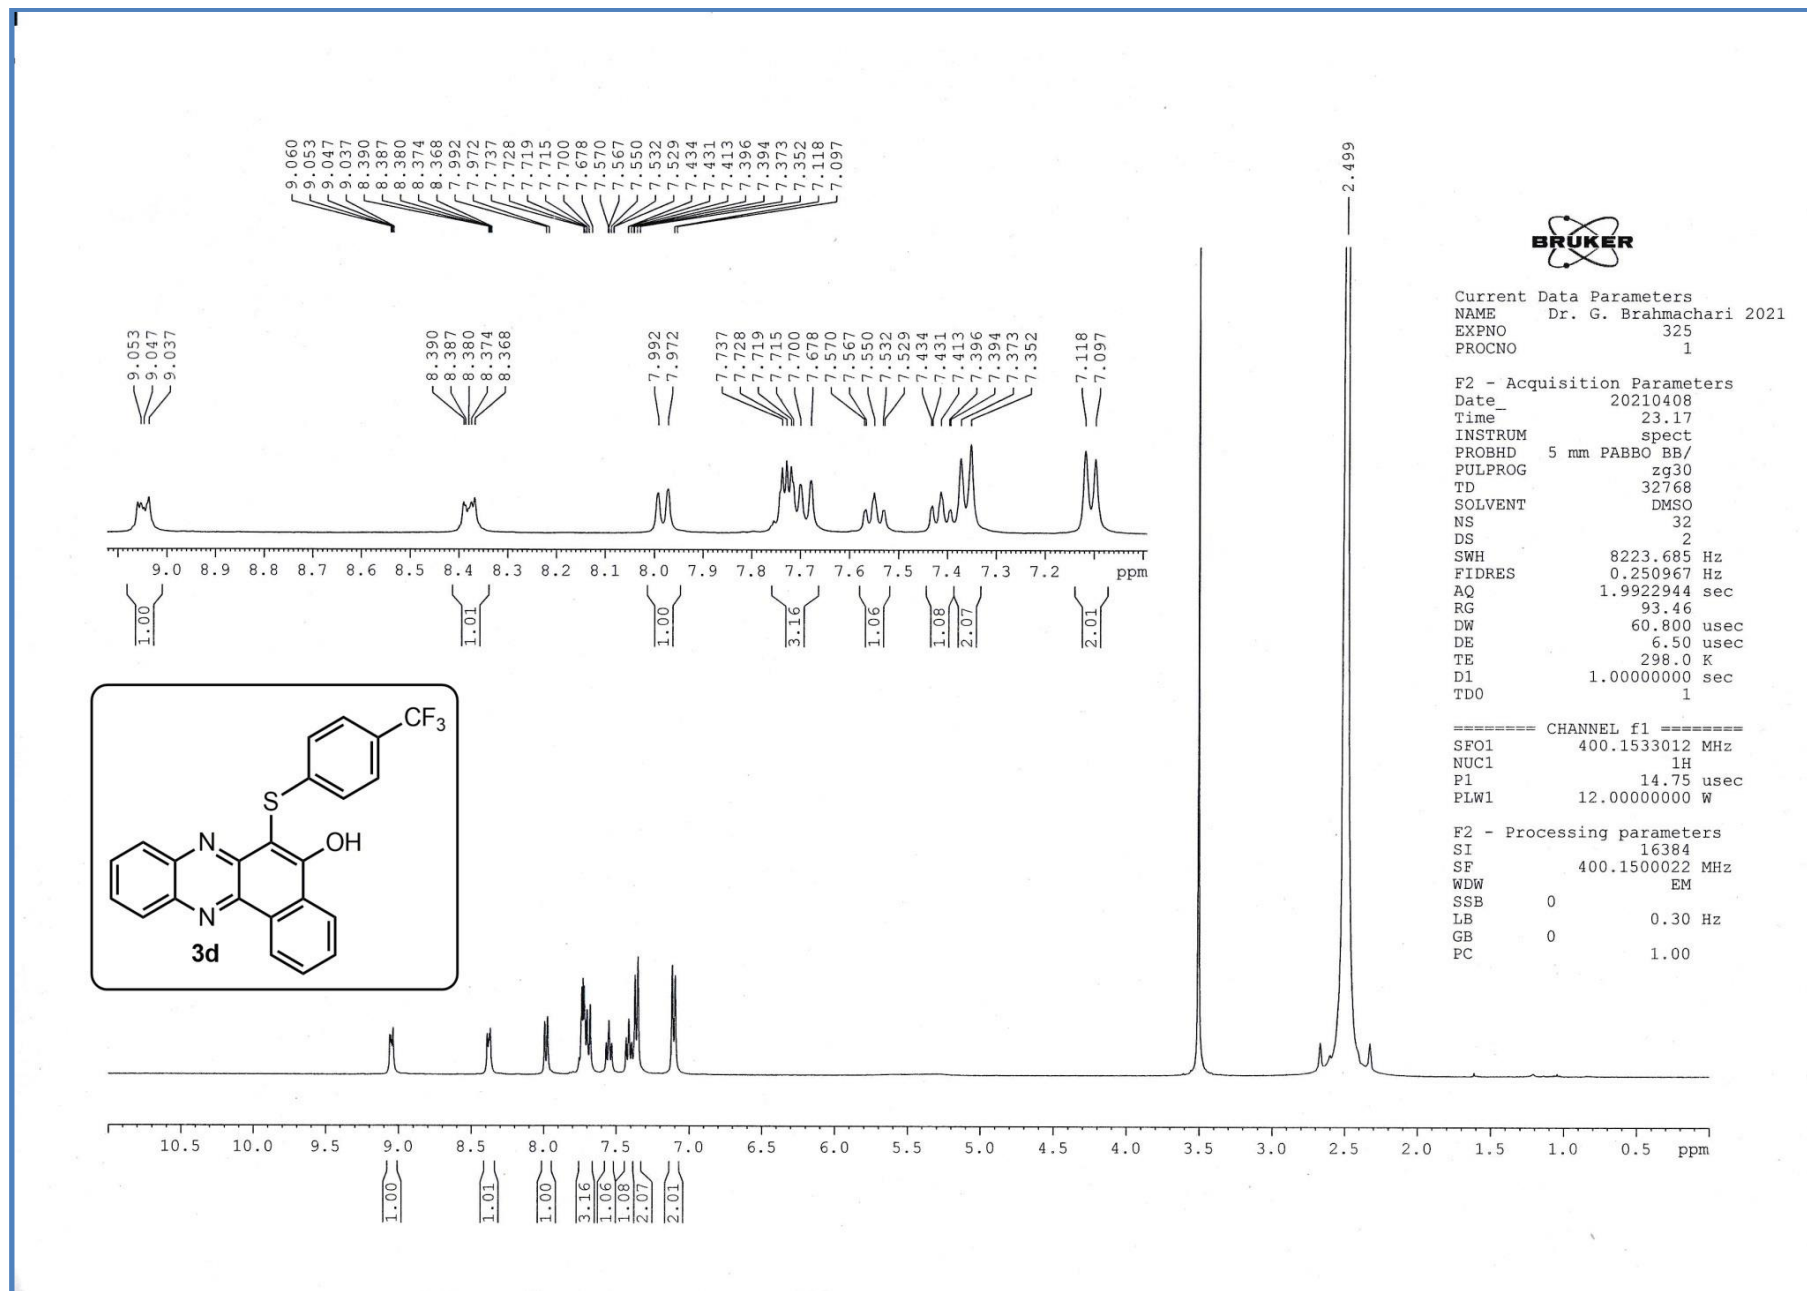

Figure S23. <sup>1</sup>H-NMR spectrum of 6-((4-(trifluoromethyl)phenyl)thio)benzo[*a*]phenazin-5-ol (**3d**)

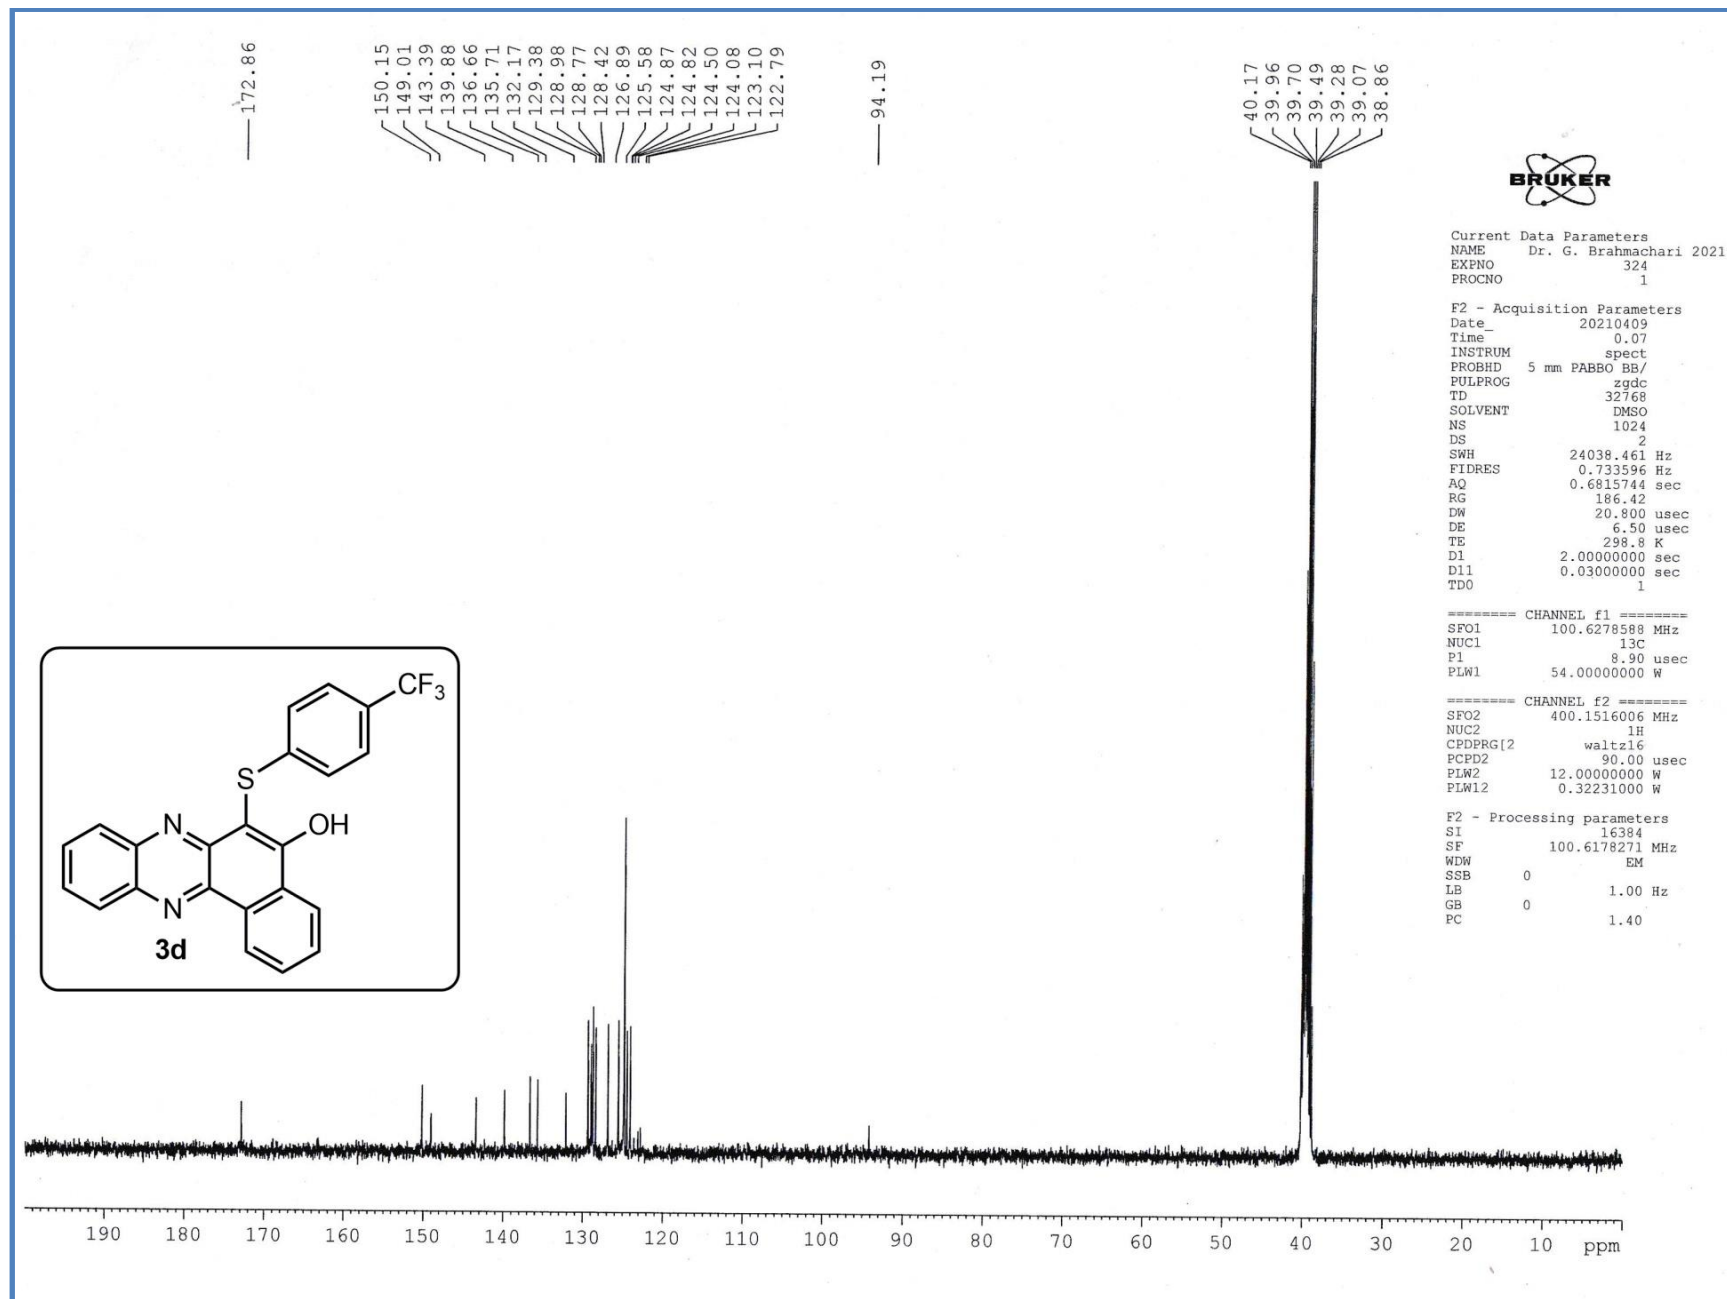

Figure S24. <sup>13</sup>C-NMR spectrum of 6-((4-(trifluoromethyl)phenyl)thio)benzo[*a*]phenazin-5-ol (**3d**)

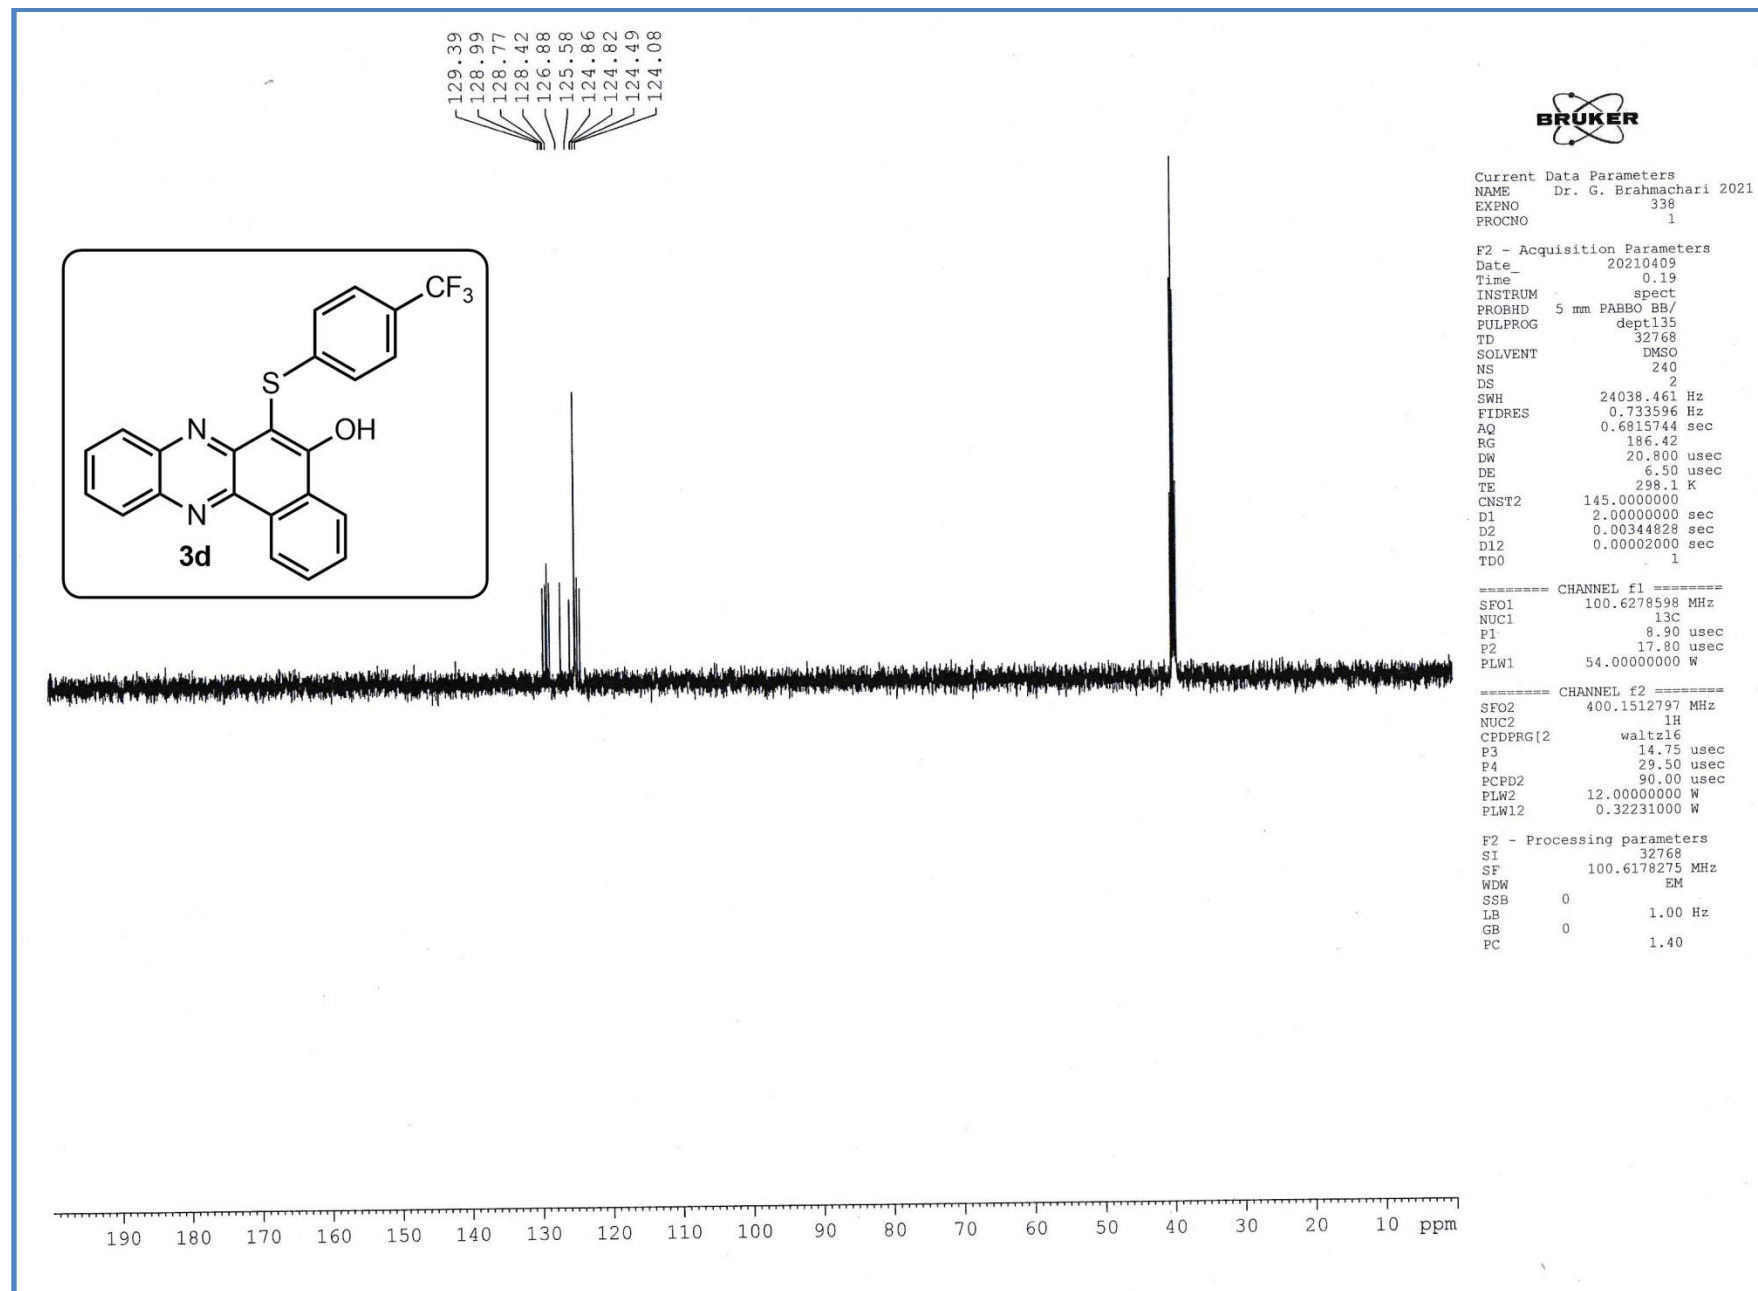

Figure S25. DEPT-135 NMR spectrum of 6-((4-(trifluoromethyl)phenyl)thio)benzo[*a*]phenazin-5-ol (**3d**)

GB-62 5 (0.101) Sm (Mn, 2x3.00); Cm (2:5)

TOF MS ES+  
2.77e6

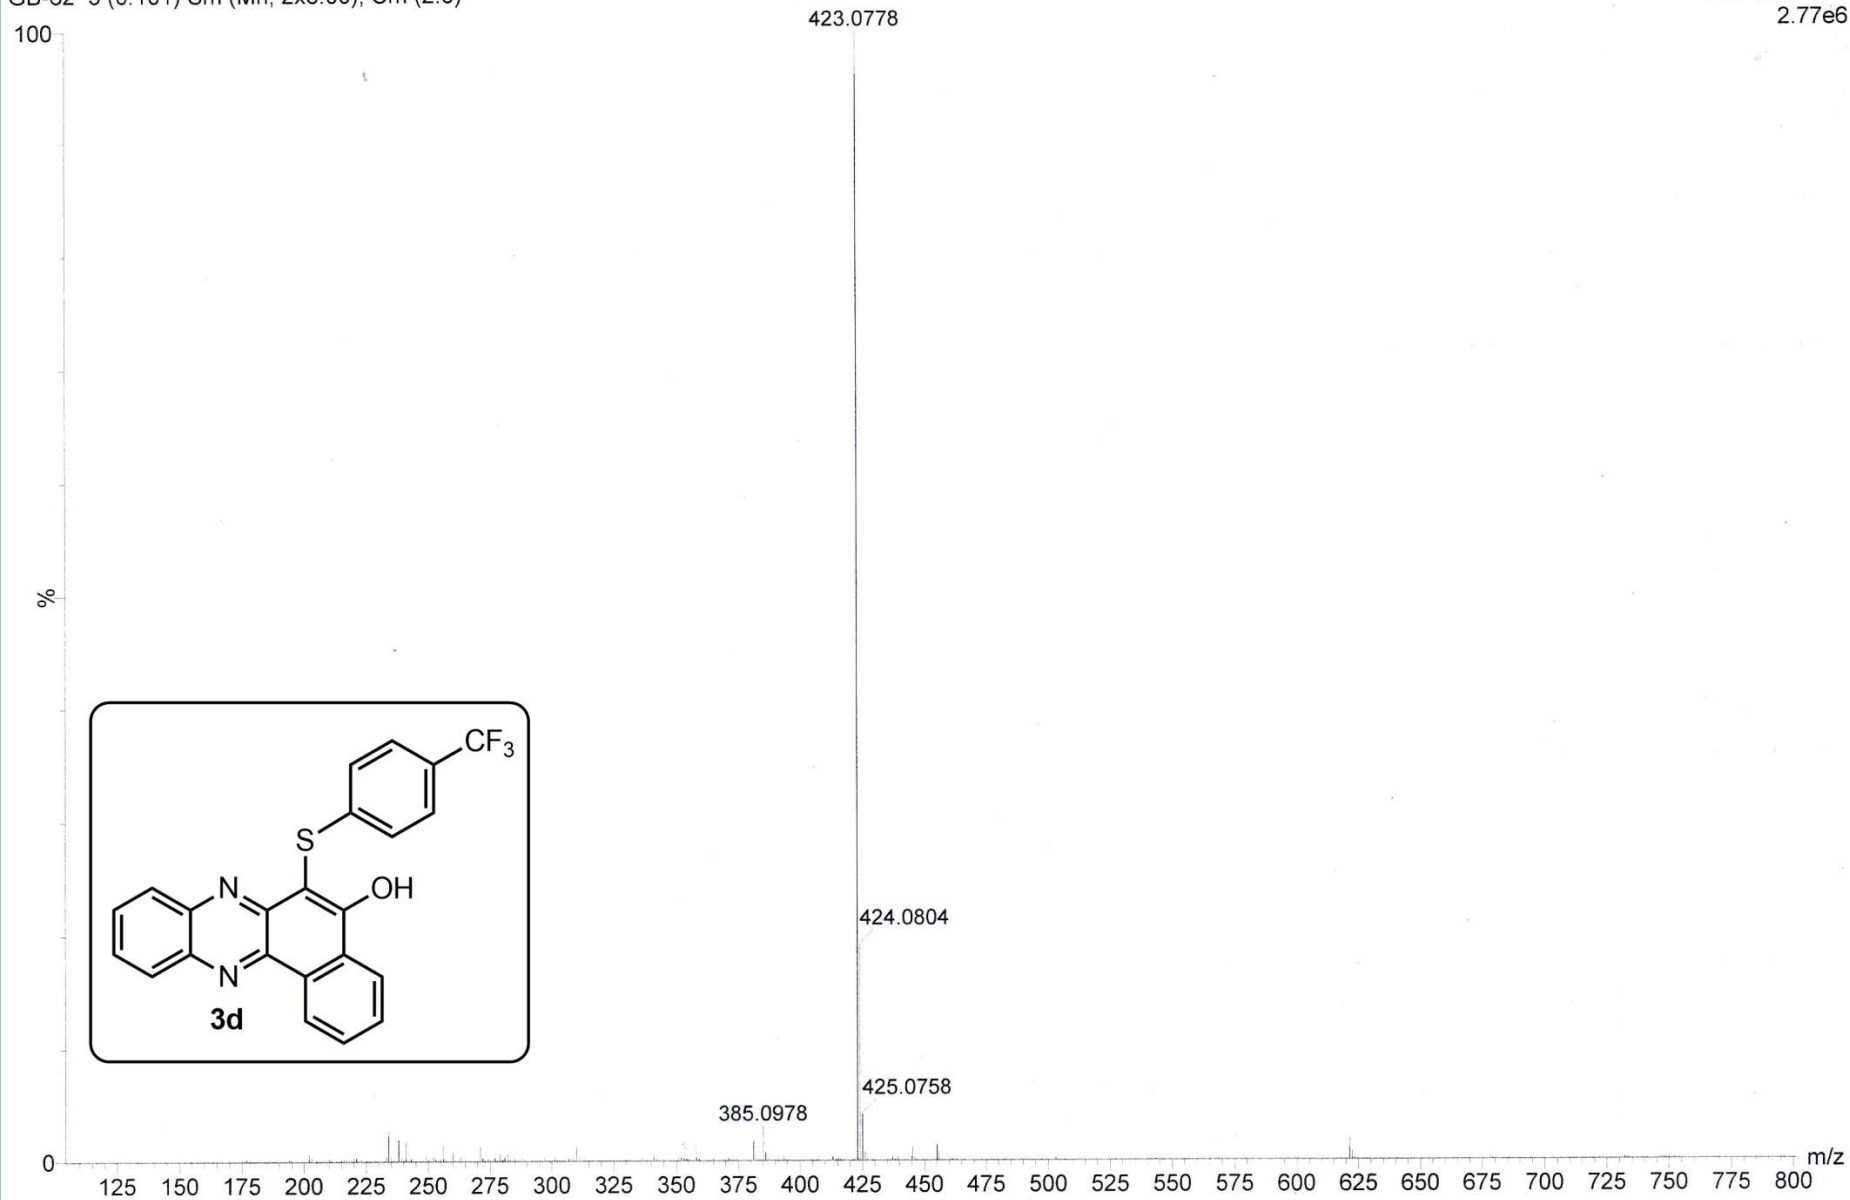

Figure S26. High-resolution Mass spectra of 6-((4-(trifluoromethyl)phenyl)thio)benzo[*a*]phenazin-5-ol (**3d**)



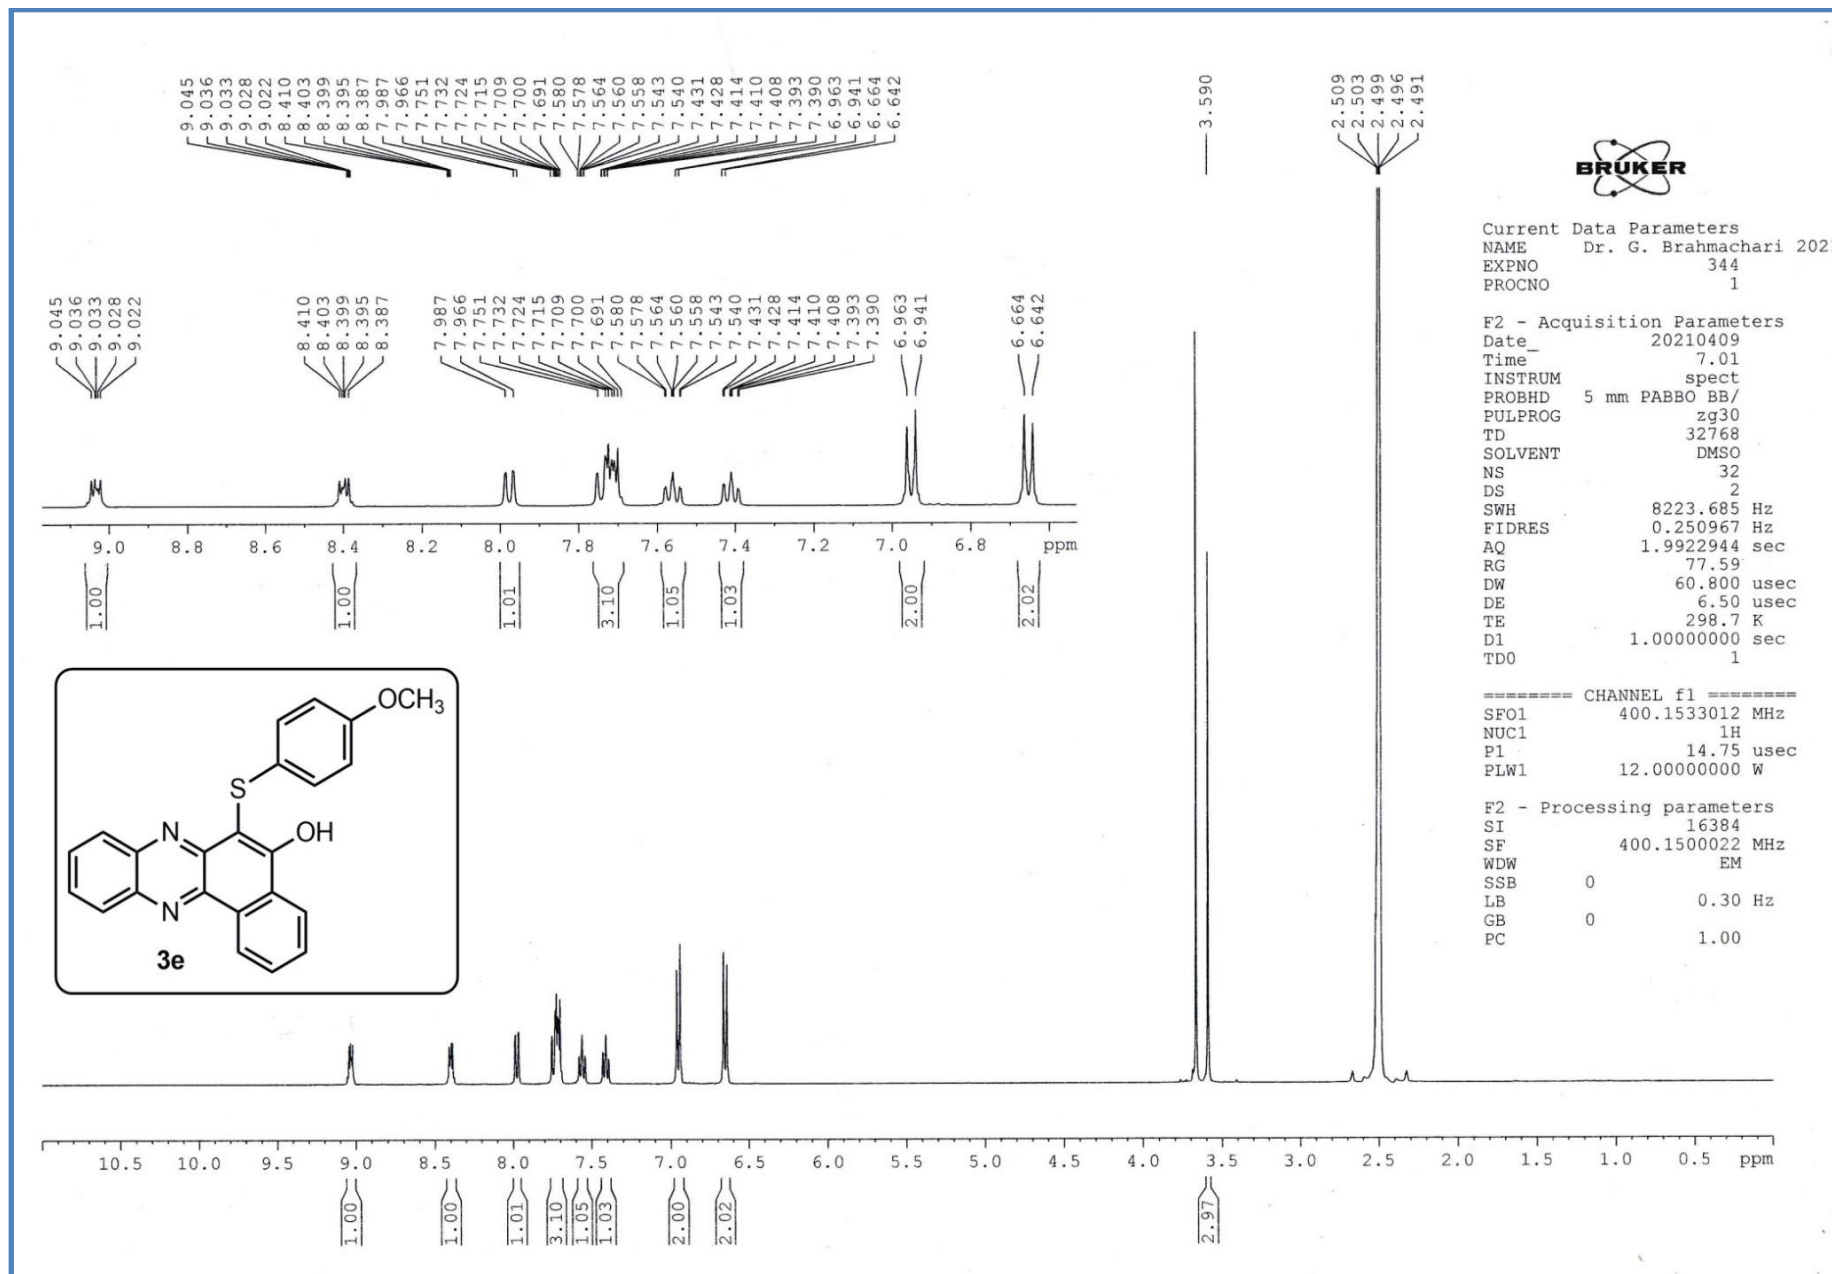

Figure S27.  $^1\text{H-NMR}$  spectrum of 6-((4-methoxyphenyl)thio)benzo[*a*]phenazin-5-ol (**3e**)

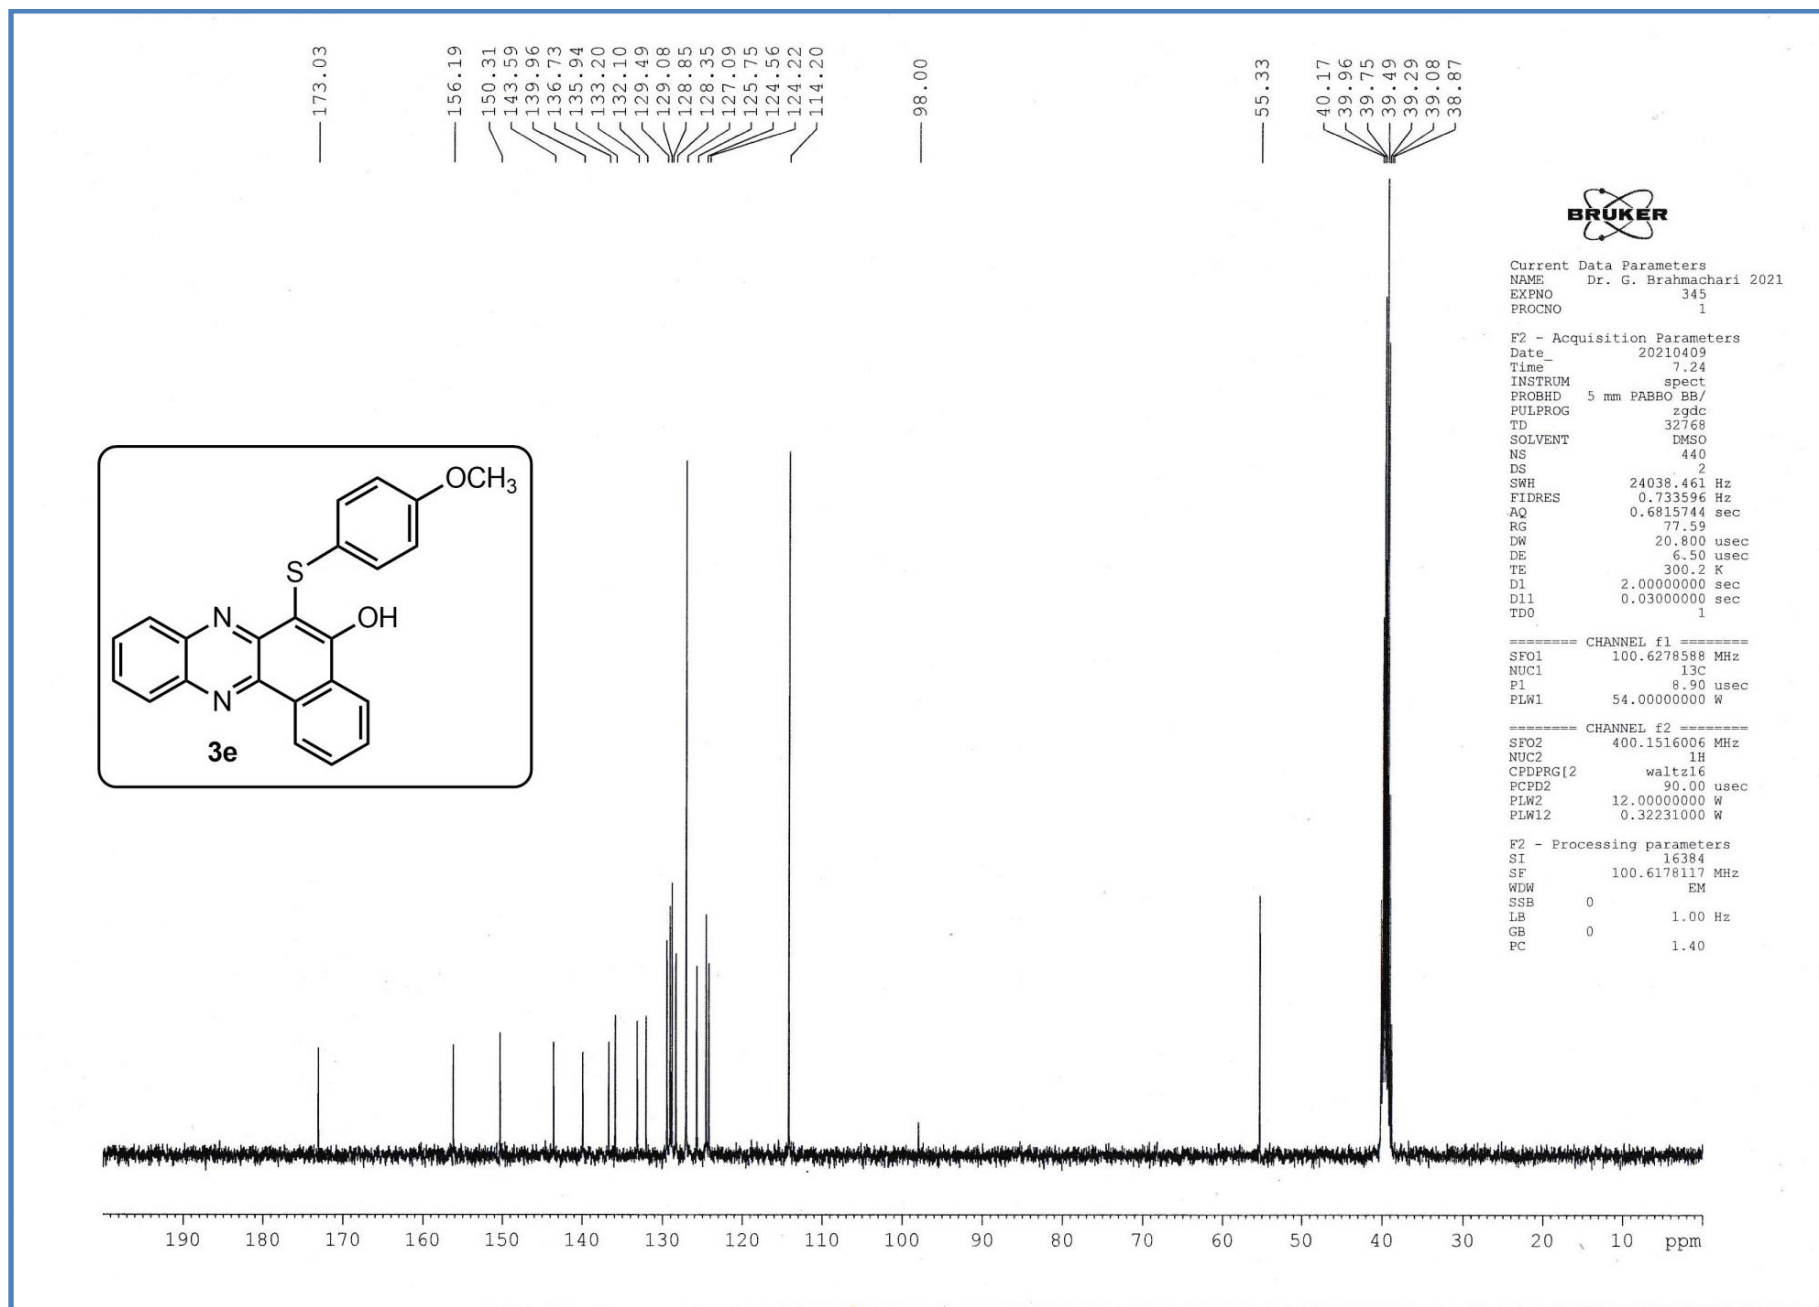

Figure S28. <sup>13</sup>C-NMR spectrum of 6-((4-methoxyphenyl)thio)benzo[*a*]phenazin-5-ol (**3e**)

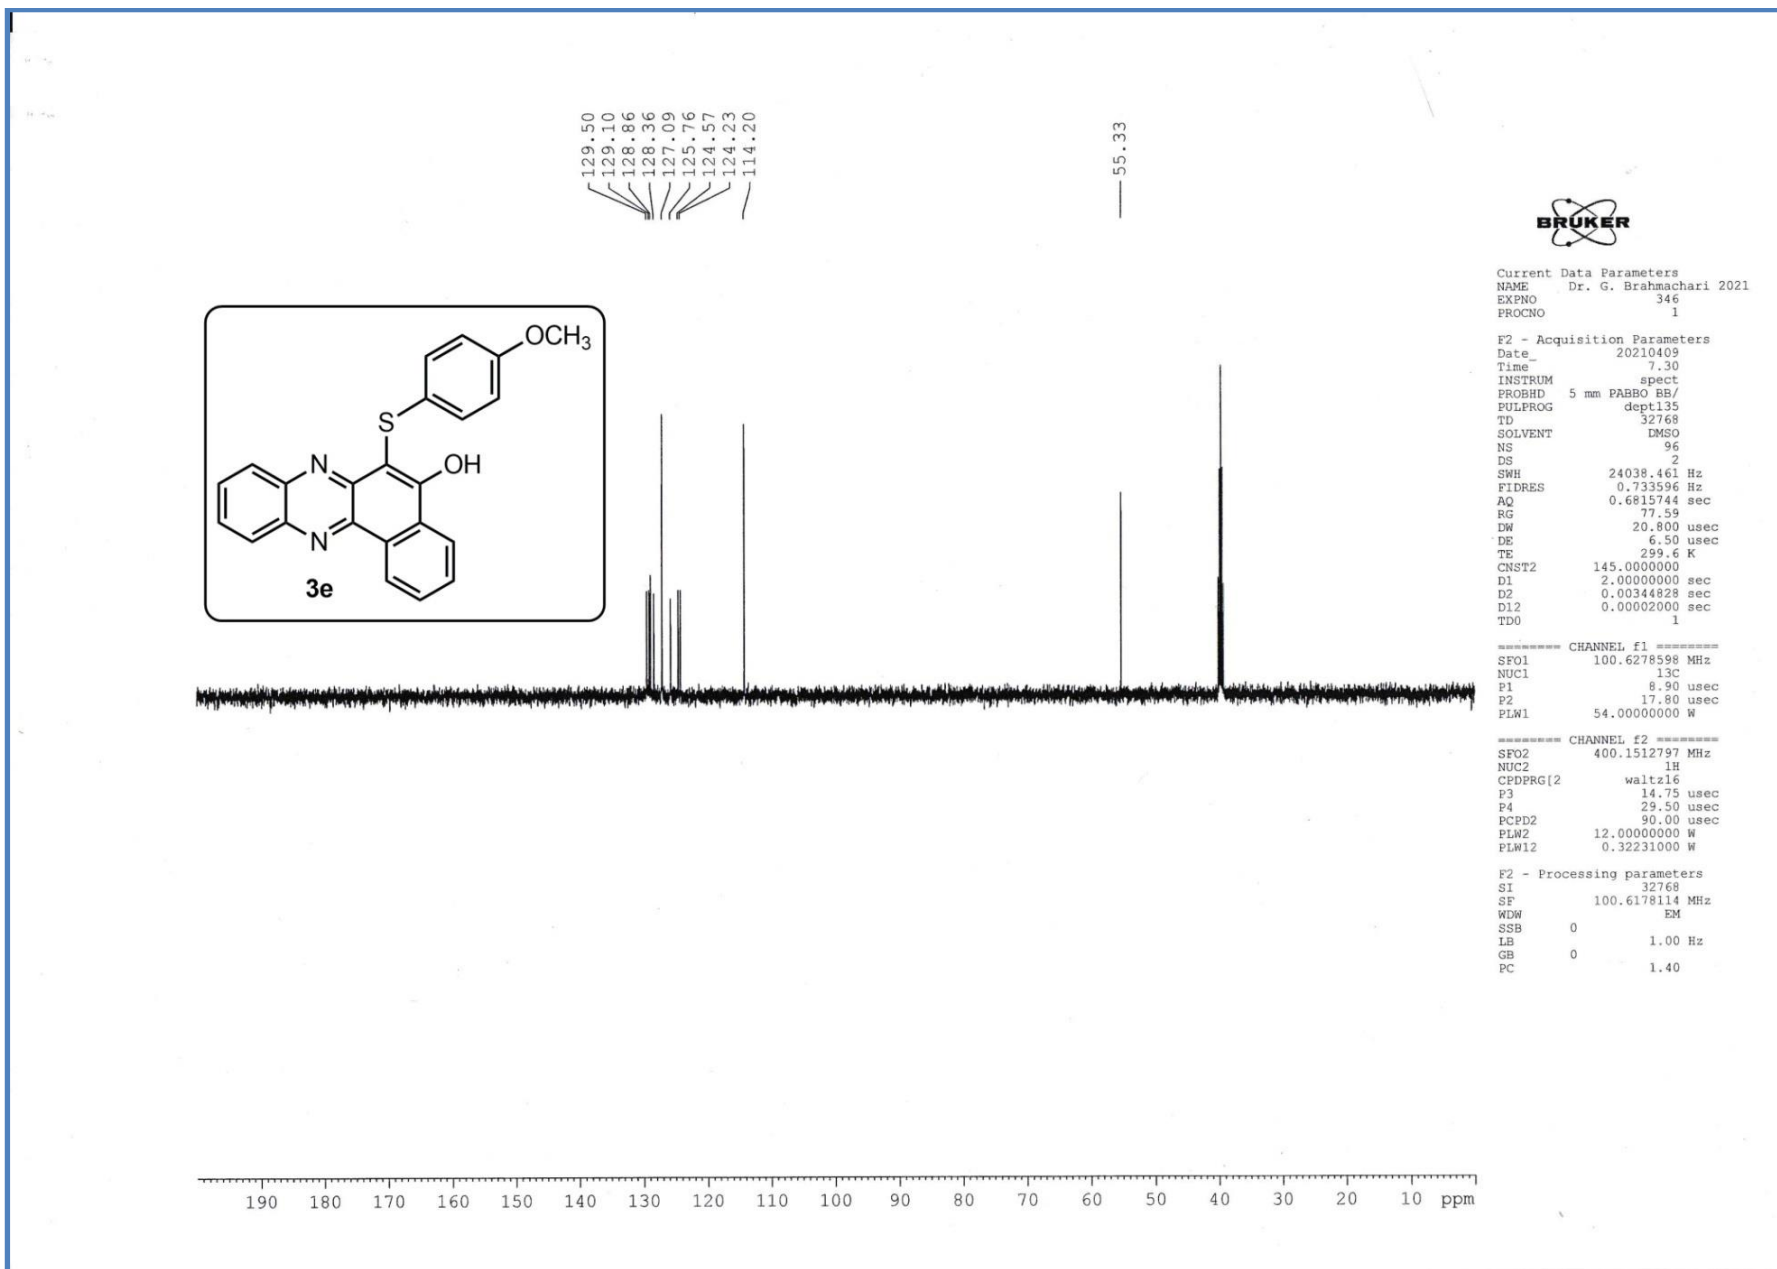

Figure S29. DEPT-135 NMR spectrum of 6-((4-methoxyphenyl)thio)benzo[a]phenazin-5-ol (**3e**)

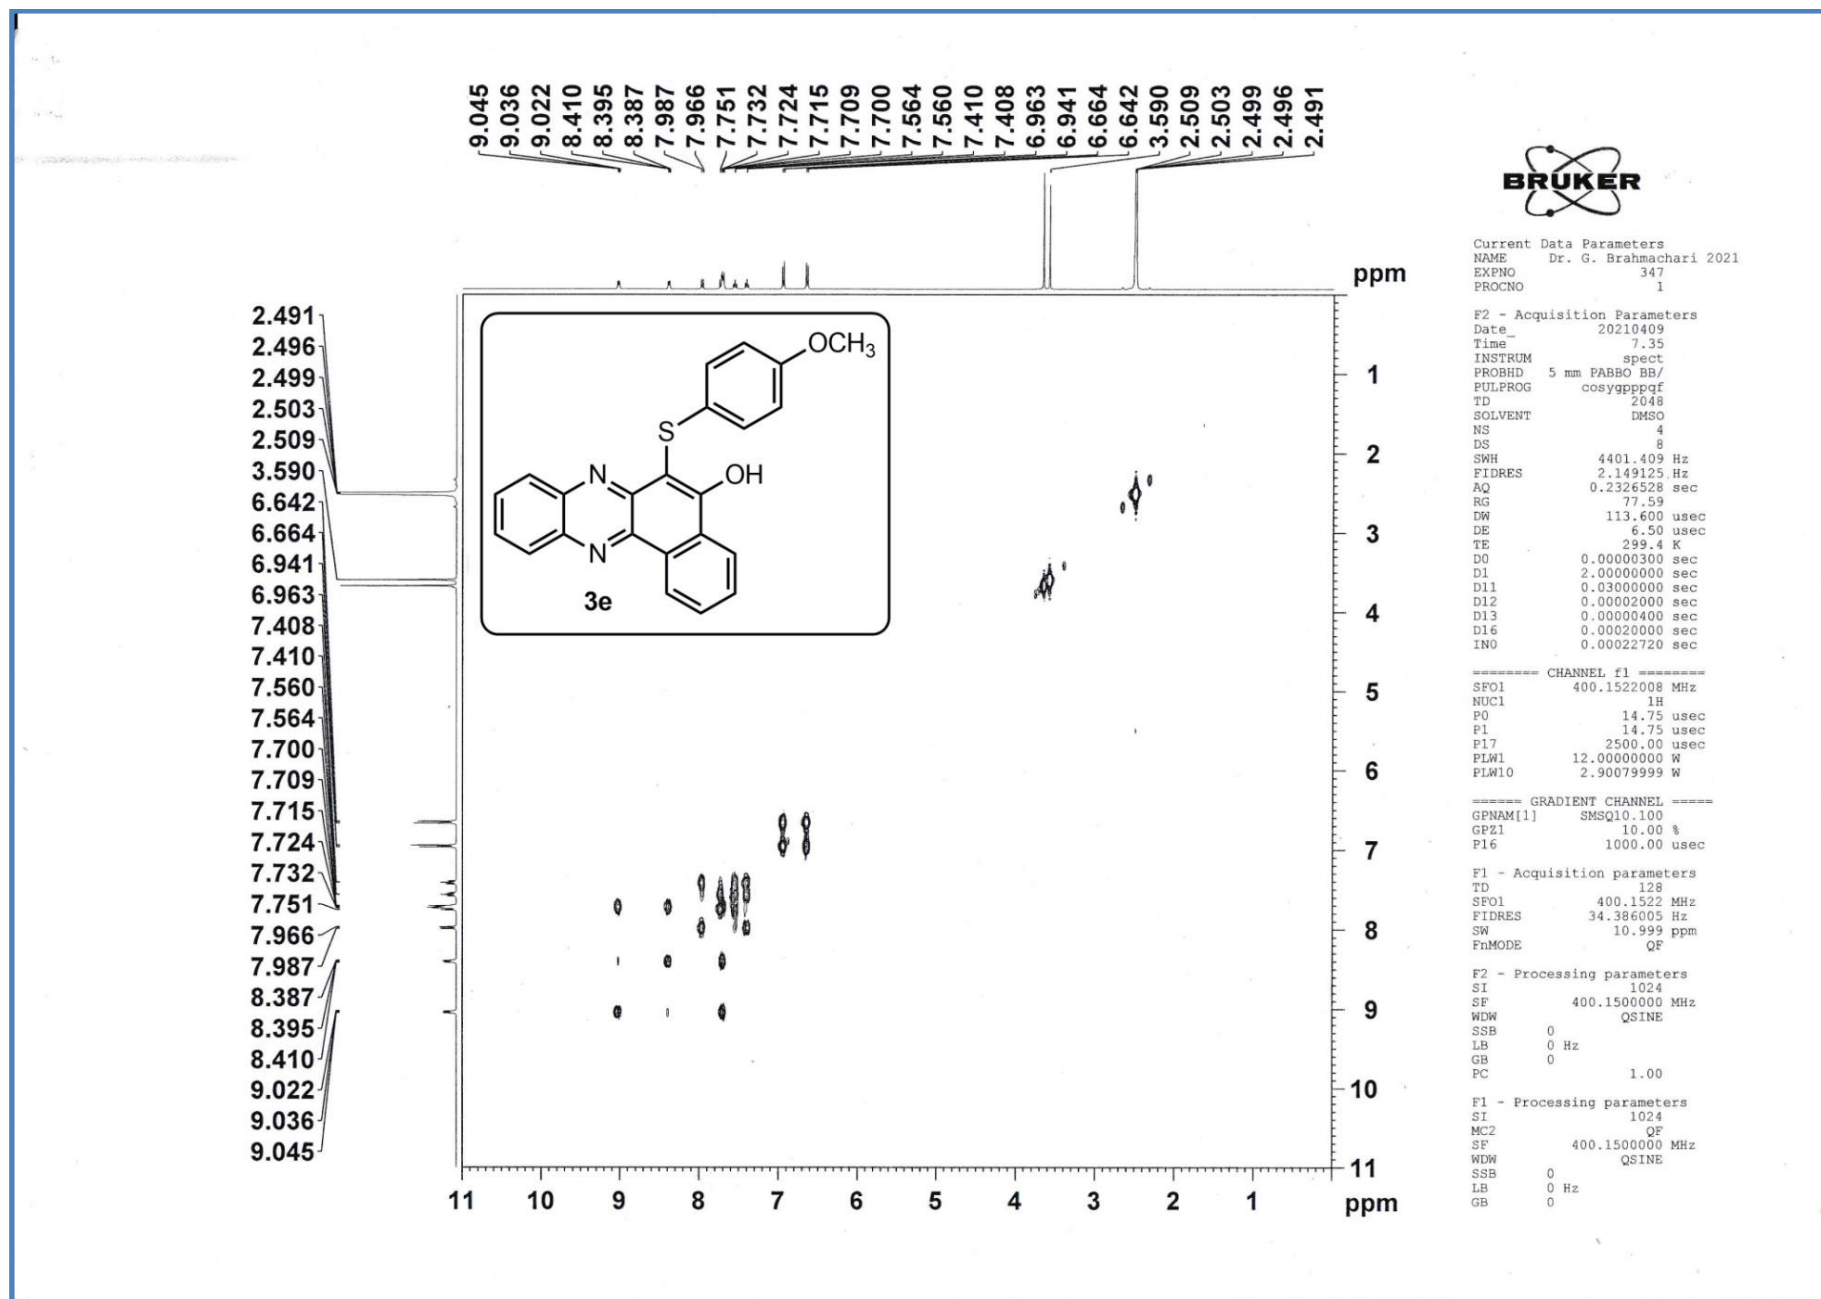

Figure S30.  $^1\text{H}$ - $^1\text{H}$  COSY45 spectra of 6-((4-methoxyphenyl)thio)benzo[*a*]phenazin-5-ol (**3e**)

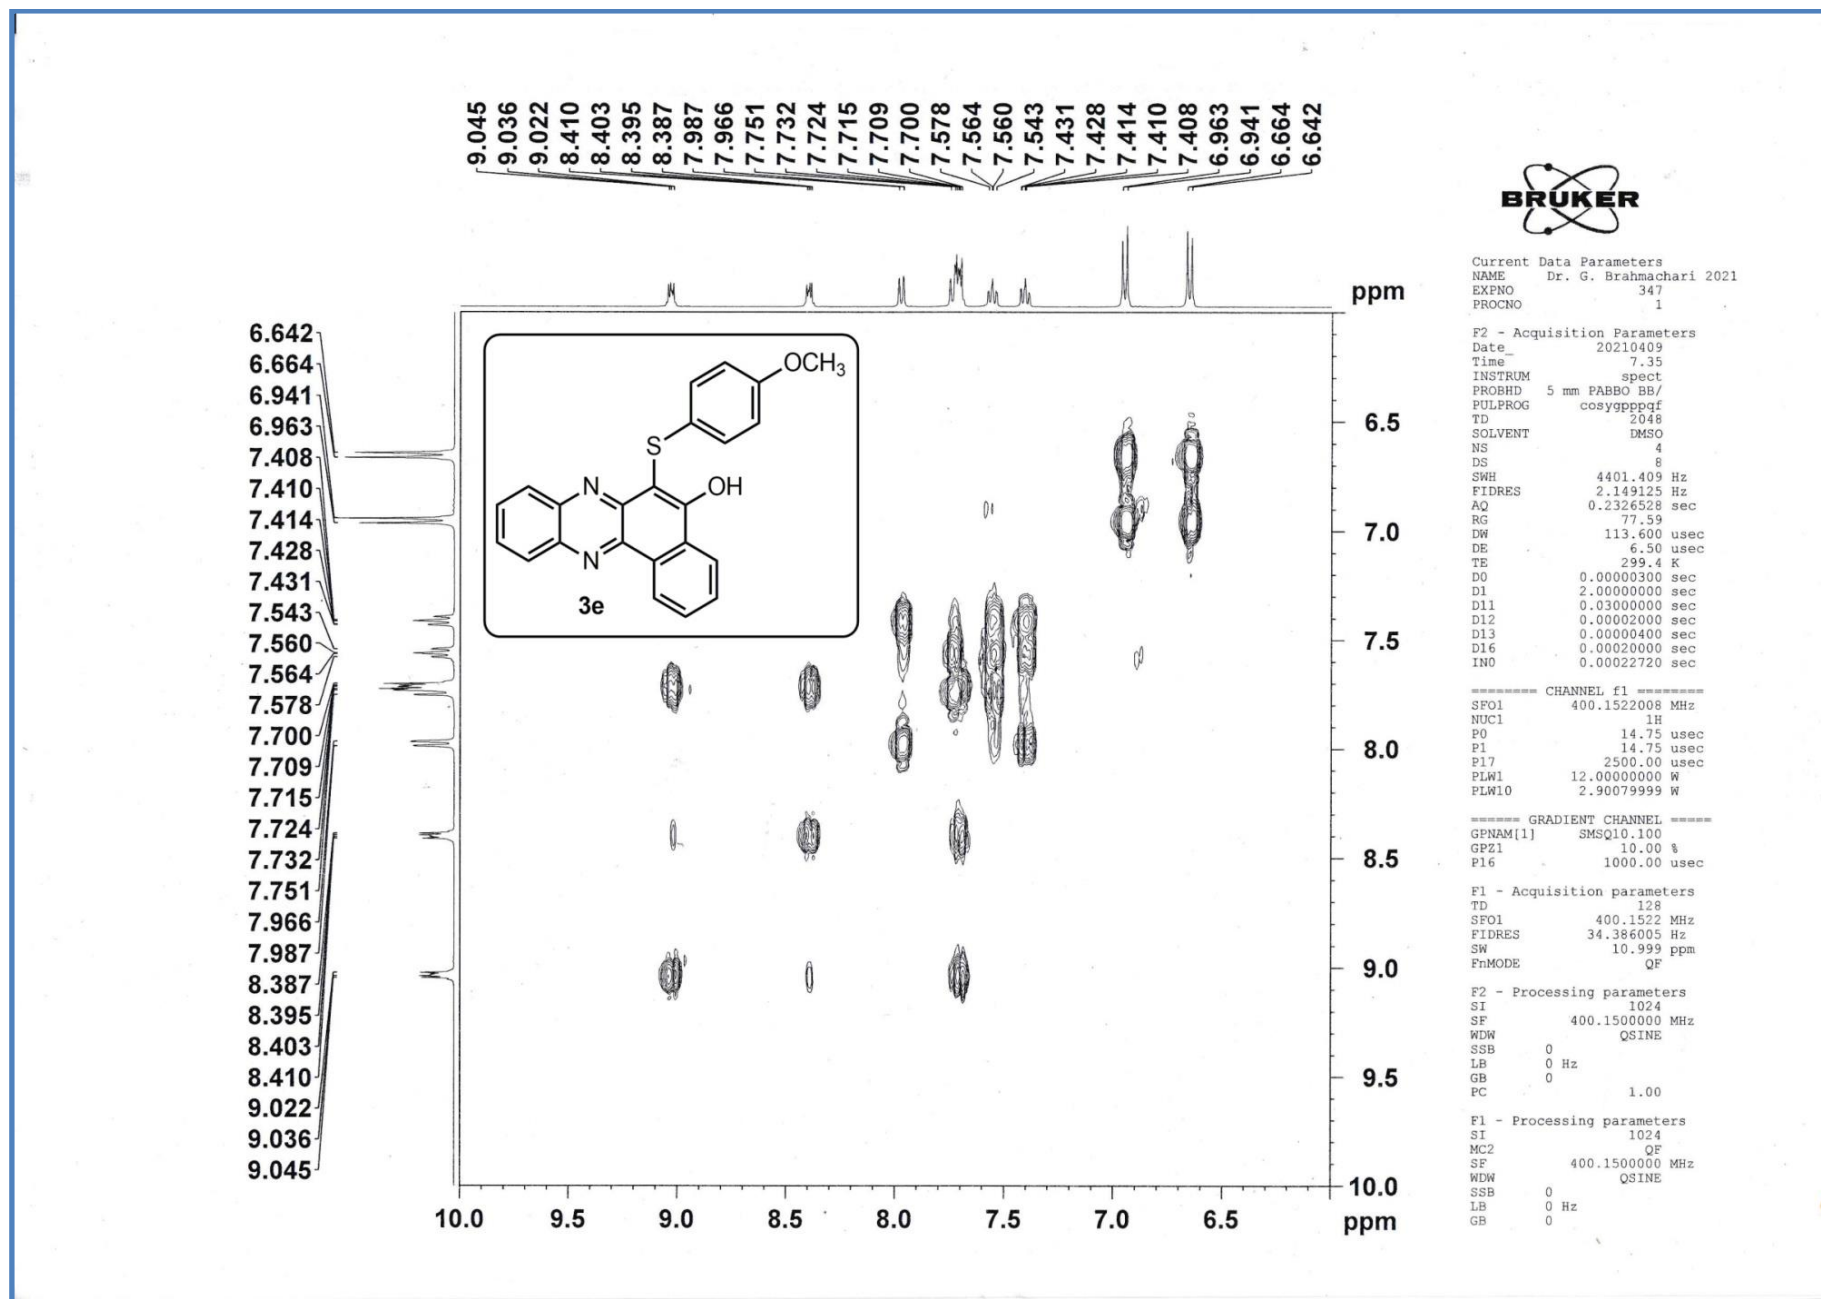

Figure S30a. <sup>1</sup>H-<sup>1</sup>H COSY45 spectra of 6-((4-methoxyphenyl)thio)benzo[*a*]phenazin-5-ol (**3e**) [extended form]

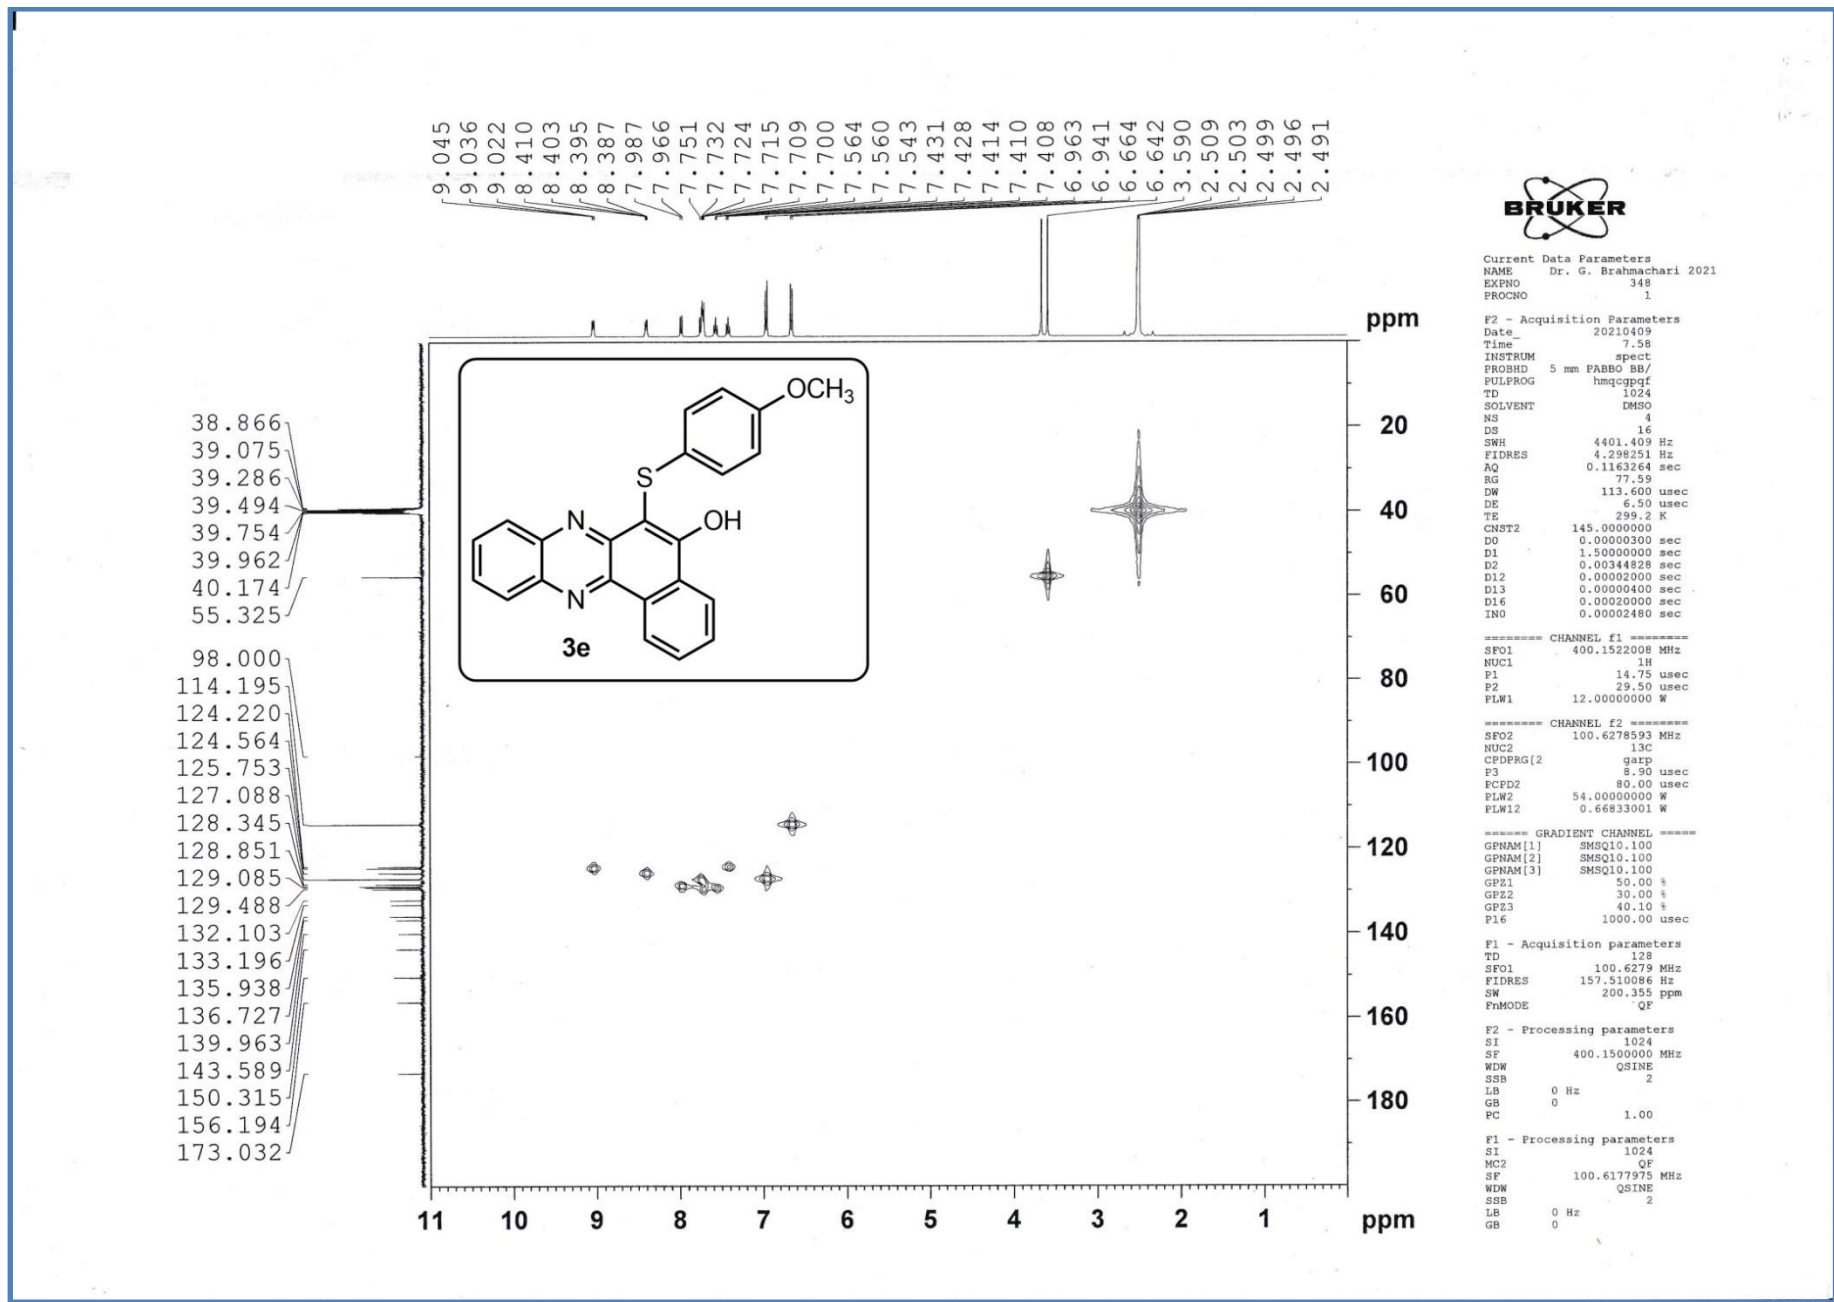

Figure S31.  $^1\text{H}$ - $^{13}\text{C}$  HMQC spectra of 6-((4-methoxyphenyl)thio)benzo[*a*]phenazin-5-ol (**3e**)

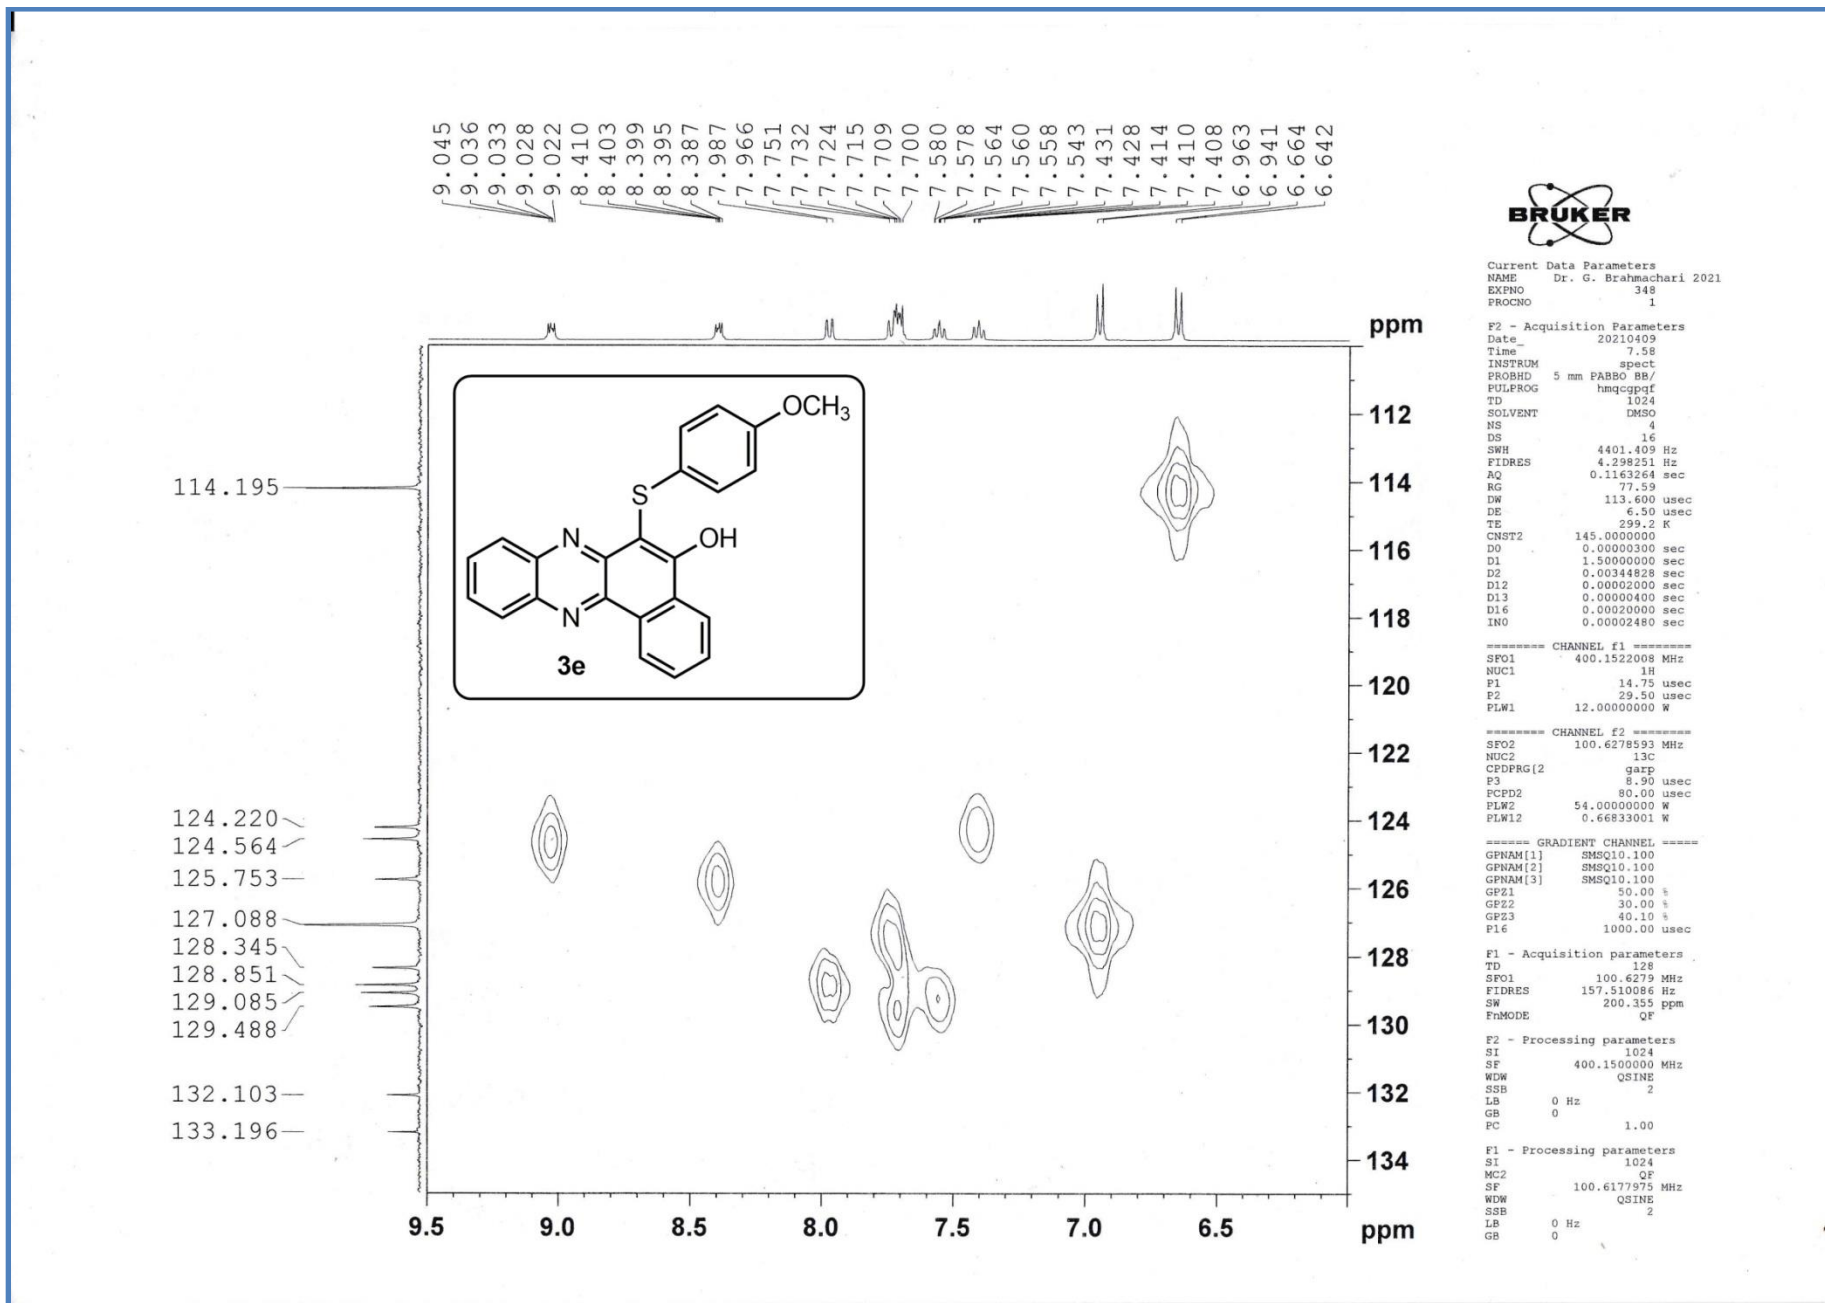

Figure S31a.  $^1\text{H}$ - $^{13}\text{C}$  HMQC spectra of 6-((4-methoxyphenyl)thio)benzo[*a*]phenazin-5-ol (**3e**) [extended form]

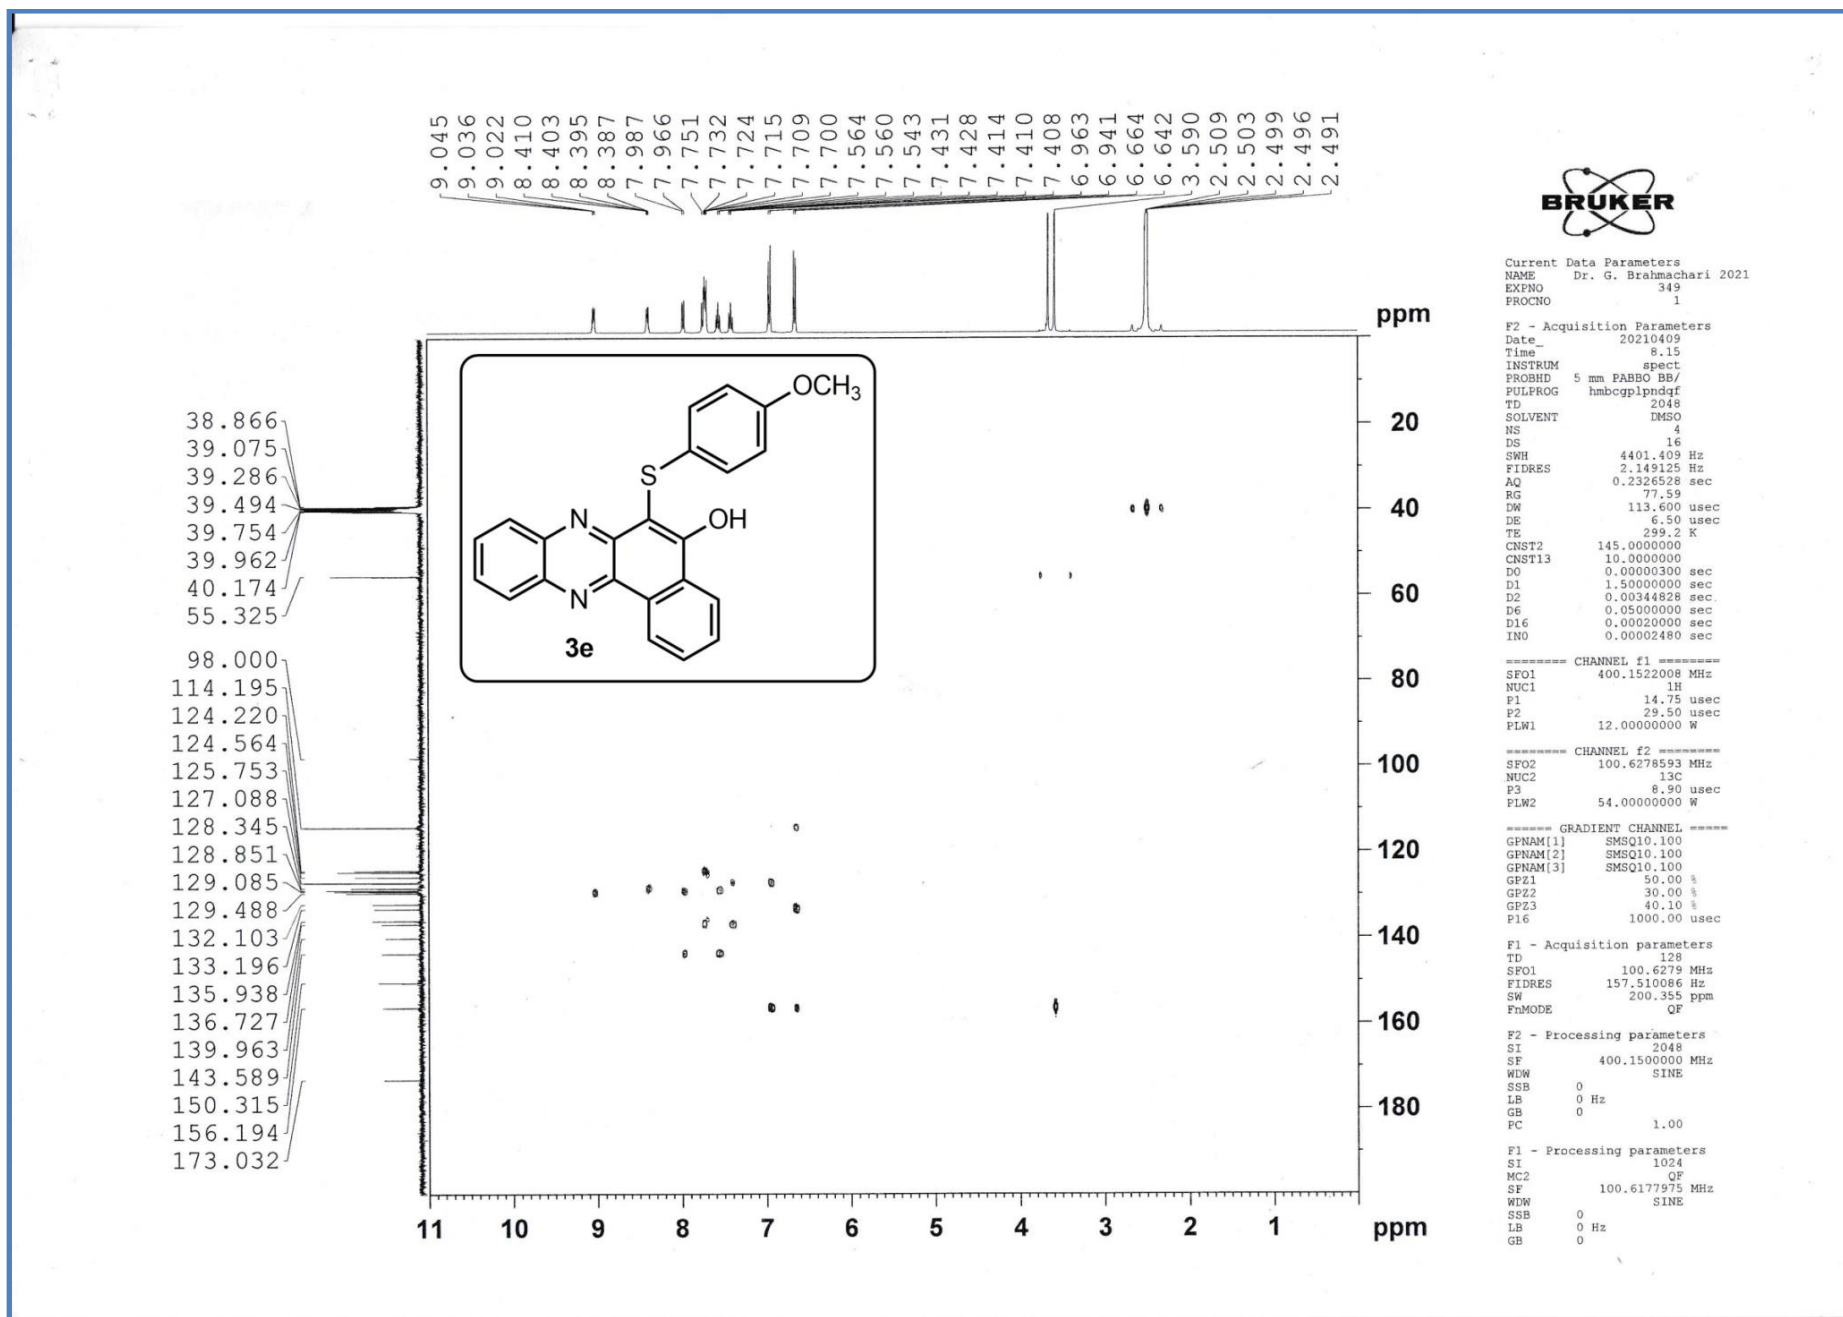

Figure S32.  $^1\text{H}$ - $^{13}\text{C}$  HMBC spectra of 6-((4-methoxyphenyl)thio)benzo[*a*]phenazin-5-ol (**3e**)



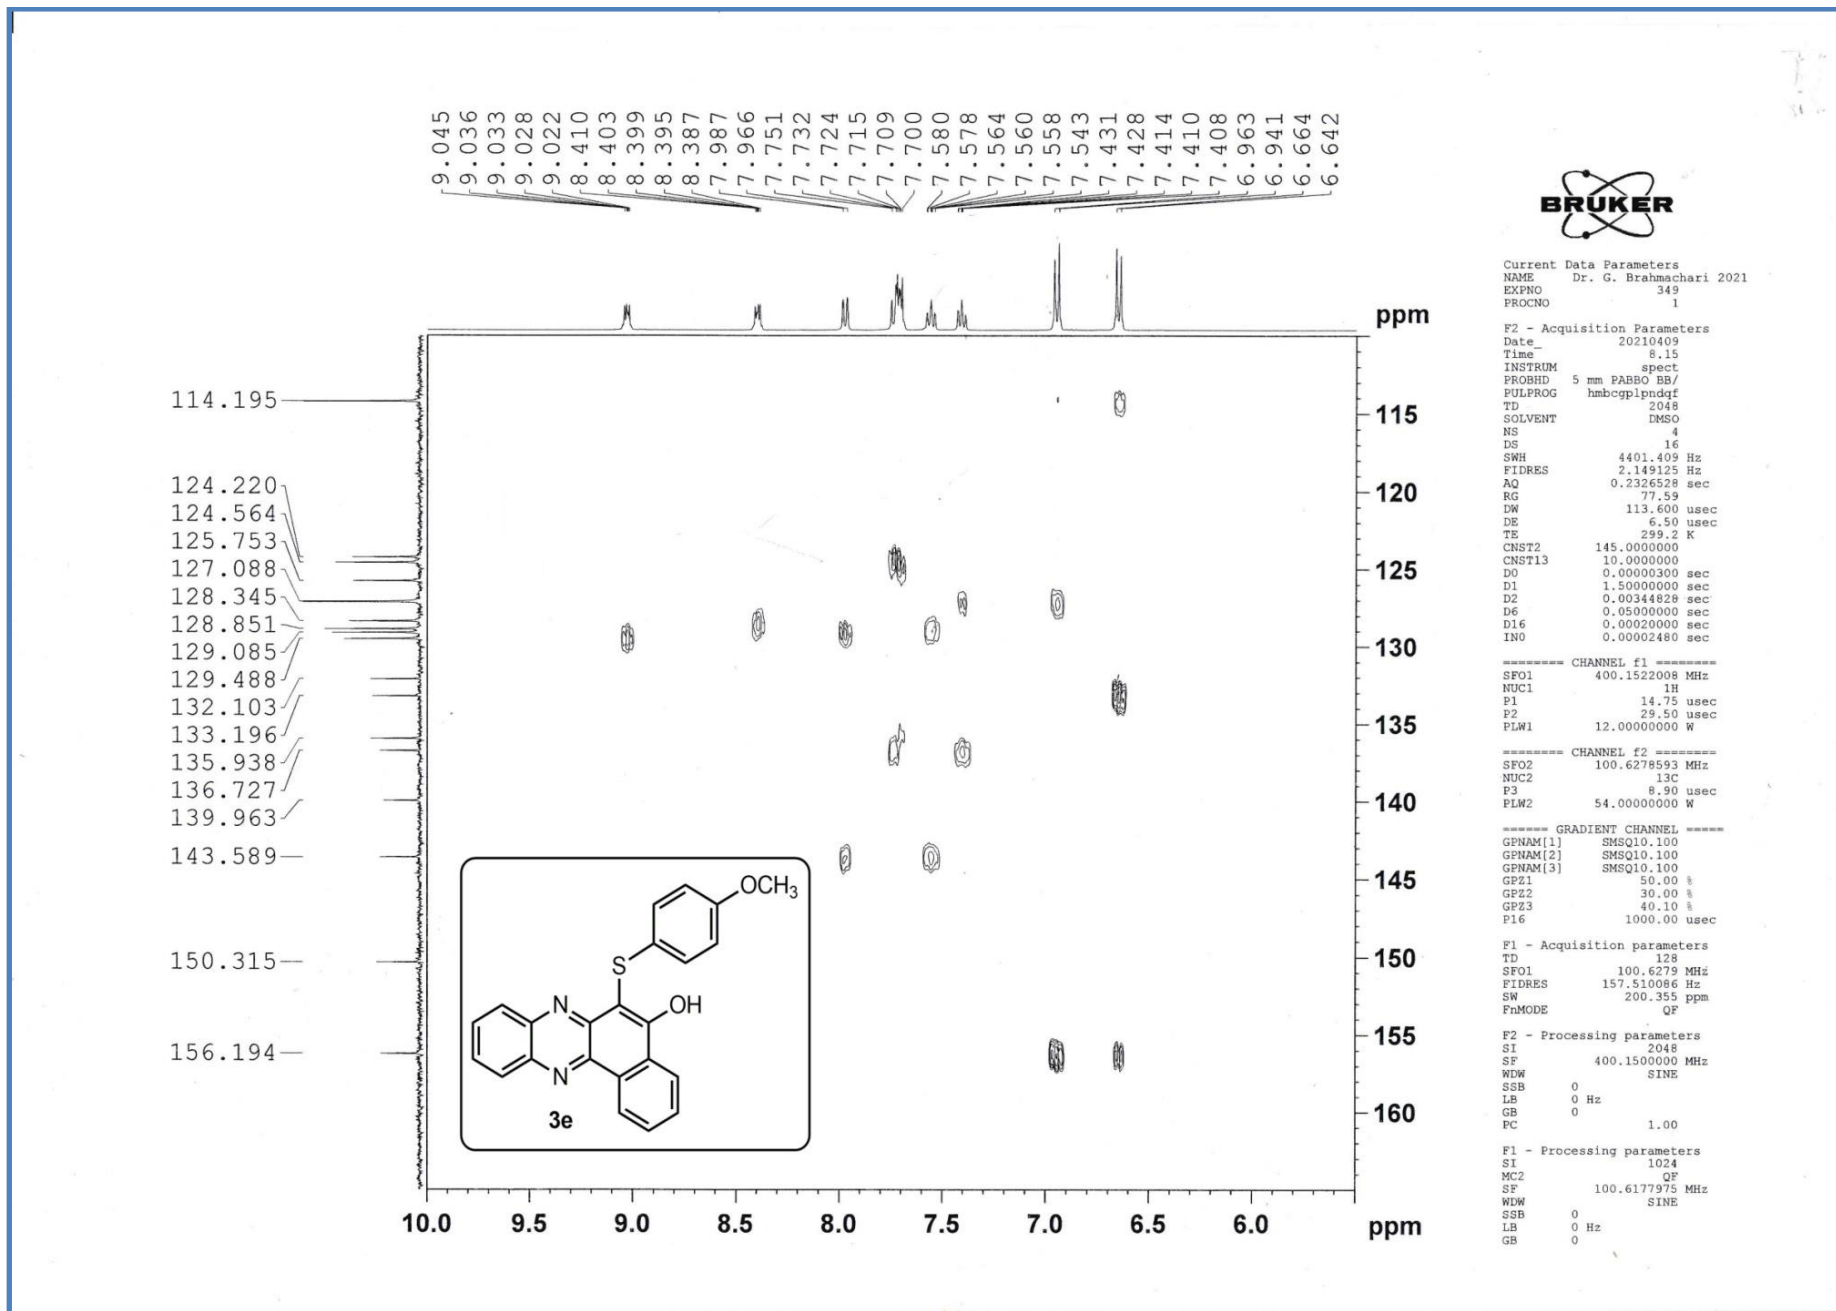

Figure S32a.  $^1\text{H}$ - $^{13}\text{C}$  HMBC spectra of 6-((4-methoxyphenyl)thio)benzo[*a*]phenazin-5-ol (**3e**)

**Table S1. 2D-NMR properties of representative compound 3e showing the corresponding homo- and hetero-nuclear interactions**

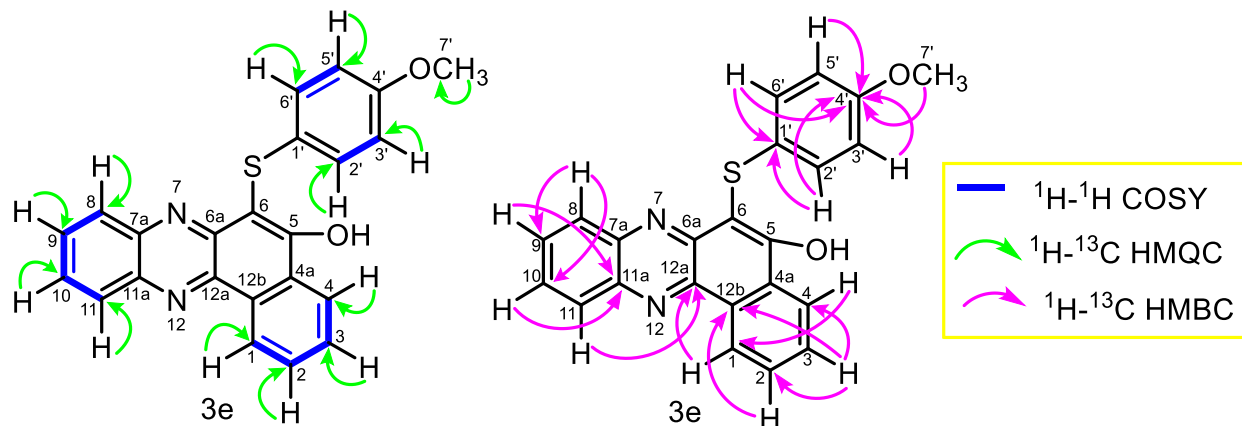

| Carbon | $^1\text{H}$ (ppm/ $\delta$ )  | $^{13}\text{C}$ (ppm/ $\delta$ ) | DEPT-135 | $^1\text{H}-^1\text{H}$ COSY-45                                                    | $^1\text{H}-^{13}\text{C}$ HMQC                   | $^1\text{H}-^{13}\text{C}$ HMBC                                                              |
|--------|--------------------------------|----------------------------------|----------|------------------------------------------------------------------------------------|---------------------------------------------------|----------------------------------------------------------------------------------------------|
| C-1    | 7.98 (d, 1H, J = 8.4 Hz, Ar-H) | 129.09                           | CH       | H-1 ( $\delta$ 7.98) vs H-2 ( $\delta$ 7.43-7.39)                                  | $\delta$ 7.98 (H-1) vs $\delta$ 129.09 (C-1)      | $\delta$ 7.98 (H-1) vs $\delta$ 143.59 (C-12a)                                               |
| C-2    | 7.43-7.39 (m, 1H, Ar-H)        | 124.22                           | CH       | H-2 ( $\delta$ 7.43-7.39) vs H-1 ( $\delta$ 7.98) & H-3 ( $\delta$ 7.75-7.69)      | $\delta$ 7.43-7.39 (H-2) vs $\delta$ 124.22 (C-2) | $\delta$ 7.43-7.39 (H-2) vs $\delta$ 135.94 (C-12b)                                          |
| C-3    | 7.75-7.69 (m, 1H, Ar-H)        | 128.34                           | CH       | H-3 ( $\delta$ 7.75-7.69) vs H-2 ( $\delta$ 7.43-7.39) & H-4 ( $\delta$ 9.05-9.02) | $\delta$ 7.75 (H-3) vs $\delta$ 128.34 (C-3)      | $\delta$ 7.75 (H-3) vs $\delta$ 124.22 (C-2), $\delta$ 124.56 (C-4), $\delta$ 135.94 (C-12b) |
| C-4    | 9.05-9.02 (m, 1H, Ar-H)        | 124.56                           | CH       | H-4 ( $\delta$ 9.05-9.02) vs H-3 ( $\delta$ 7.75-7.69)                             | $\delta$ 9.05-9.02 (H-4) vs $\delta$ 124.56 (C-4) | $\delta$ 9.05-9.02 (H-4) vs $\delta$ 129.09 (C-1)                                            |
| C-4a   | –                              | 132.10                           | C        | –                                                                                  | –                                                 | –                                                                                            |
| C-5    | –                              | 173.03                           | C        | –                                                                                  | –                                                 | –                                                                                            |
| C-6    | –                              | 98.00                            | C        | –                                                                                  | –                                                 | –                                                                                            |
| C-6a   | –                              | 150.31                           | C        | –                                                                                  | –                                                 | –                                                                                            |
| C-7a   | –                              | 139.96                           | C        | –                                                                                  | –                                                 | –                                                                                            |
| C-8    | 8.41-8.39 (m, 1H, Ar-H)        | 125.75                           | CH       | H-8 ( $\delta$ 8.41-8.39) vs H-9 ( $\delta$ 7.75-7.69)                             | $\delta$ 8.41-8.39 (H-8) vs $\delta$ 125.75 (C-8) | $\delta$ 8.41-8.39 (H-8) vs $\delta$ 128.85 (C-9/ C-10)                                      |
| C-9    | 7.75-7.69 (m, 1H, Ar-H)        | 128.85                           | CH       | H-9 ( $\delta$ 7.75-7.69) vs H-8 ( $\delta$ 8.41-8.39)                             | $\delta$ 7.75-7.69 (H-9) vs $\delta$ 128.85 (C-9) | $\delta$ 7.75-7.69 (H-9) vs $\delta$ 136.73 (C-11a)                                          |

|             |                                    |        |                  |                                                          |                                                                               |                                                                    |
|-------------|------------------------------------|--------|------------------|----------------------------------------------------------|-------------------------------------------------------------------------------|--------------------------------------------------------------------|
| C-10        | 7.75-7.69 (m, 1H, Ar-H)            | 128.85 | CH               | H-10 ( $\delta$ 7.75-7.69) vs H-11 ( $\delta$ 7.58-7.54) | $\delta$ 7.75-7.69 (H-10) vs $\delta$ 128.85 (C-10)                           | $\delta$ 7.75-7.69 (H-10) vs $\delta$ 136.73 (C-11a)               |
| C-11        | 7.58-7.54 (m, 1H, Ar-H)            | 129.49 | CH               | H-11 ( $\delta$ 7.58-7.54) vs H-10 ( $\delta$ 7.75-7.69) | $\delta$ 7.58-7.54 (H-11) vs $\delta$ 128.85 (C-11)                           | $\delta$ 7.58-7.54 (H-11) vs $\delta$ 129.49 (C-12a)               |
| C-11a       | –                                  | 136.73 | C                | –                                                        | –                                                                             | –                                                                  |
| C-12a       | –                                  | 143.59 | C                | –                                                        | –                                                                             | –                                                                  |
| C-12b       | –                                  | 135.94 | C                | –                                                        | –                                                                             | –                                                                  |
| C-1'        | –                                  | 133.20 | C                | –                                                        | –                                                                             | –                                                                  |
| C-2' & C-6' | 6.95 (d, 2H, $J = 8.8$ Hz, Ar-H)   | 127.09 | CH               | H-2'/H-6' ( $\delta$ 6.95) vs H-3'/H-5' ( $\delta$ 6.65) | $\delta$ 6.95 (H-2'/H-6') vs $\delta$ 127.09 (C-2'/C-6')                      | $\delta$ 6.95 (H-2'/H-6') vs $\delta$ 156.19 (C-4'), 133.20 (C-1') |
| C-3' & C-5' | 6.65 (d, 2H, $J = 8.8$ Hz, Ar-H)   | 114.20 | CH               | H-3'/H-5' ( $\delta$ 6.65) vs H-2'/H-6' ( $\delta$ 6.95) | $\delta$ 6.65 (H-3'/H-5') vs $\delta$ 114.20 (C-3'/C-5')                      | $\delta$ 6.65 (H-3'/H-5') vs $\delta$ 156.19 (C-4'),               |
| C-4'        | –                                  | 156.19 | C                | –                                                        | –                                                                             | –                                                                  |
| C-7'        | 3.75 (s, 3H, Ar-OCH <sub>3</sub> ) | 55.33  | OCH <sub>3</sub> | –                                                        | $\delta$ 3.59 (Ar-OCH <sub>3</sub> ) vs $\delta$ 55.33 (Ar-OCH <sub>3</sub> ) | $\delta$ 3.59 (Ar-OCH <sub>3</sub> ) vs $\delta$ 156.19 (C-4')     |

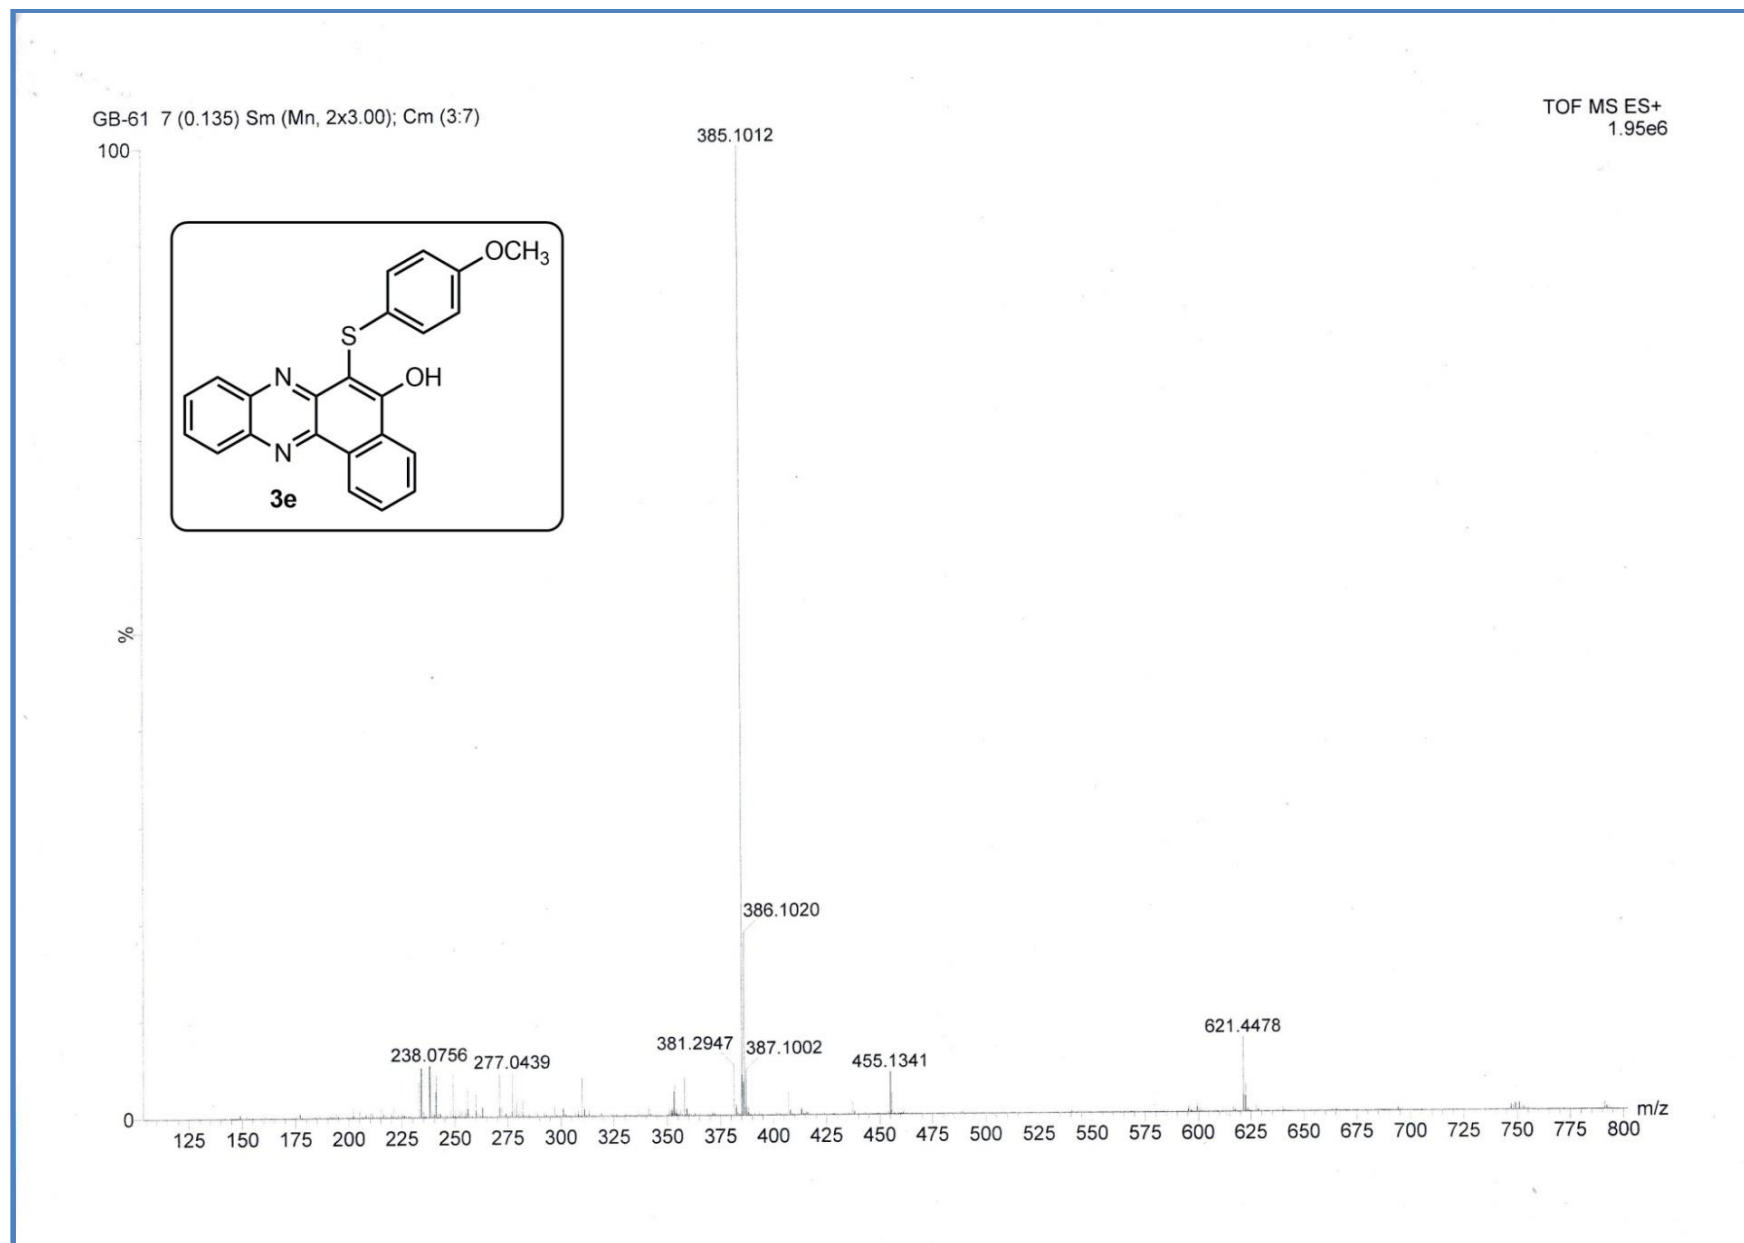

Figure S33. High-resolution Mass spectra of 6-((4-methoxyphenyl)thio)benzo[*a*]phenazin-5-ol (**3e**)

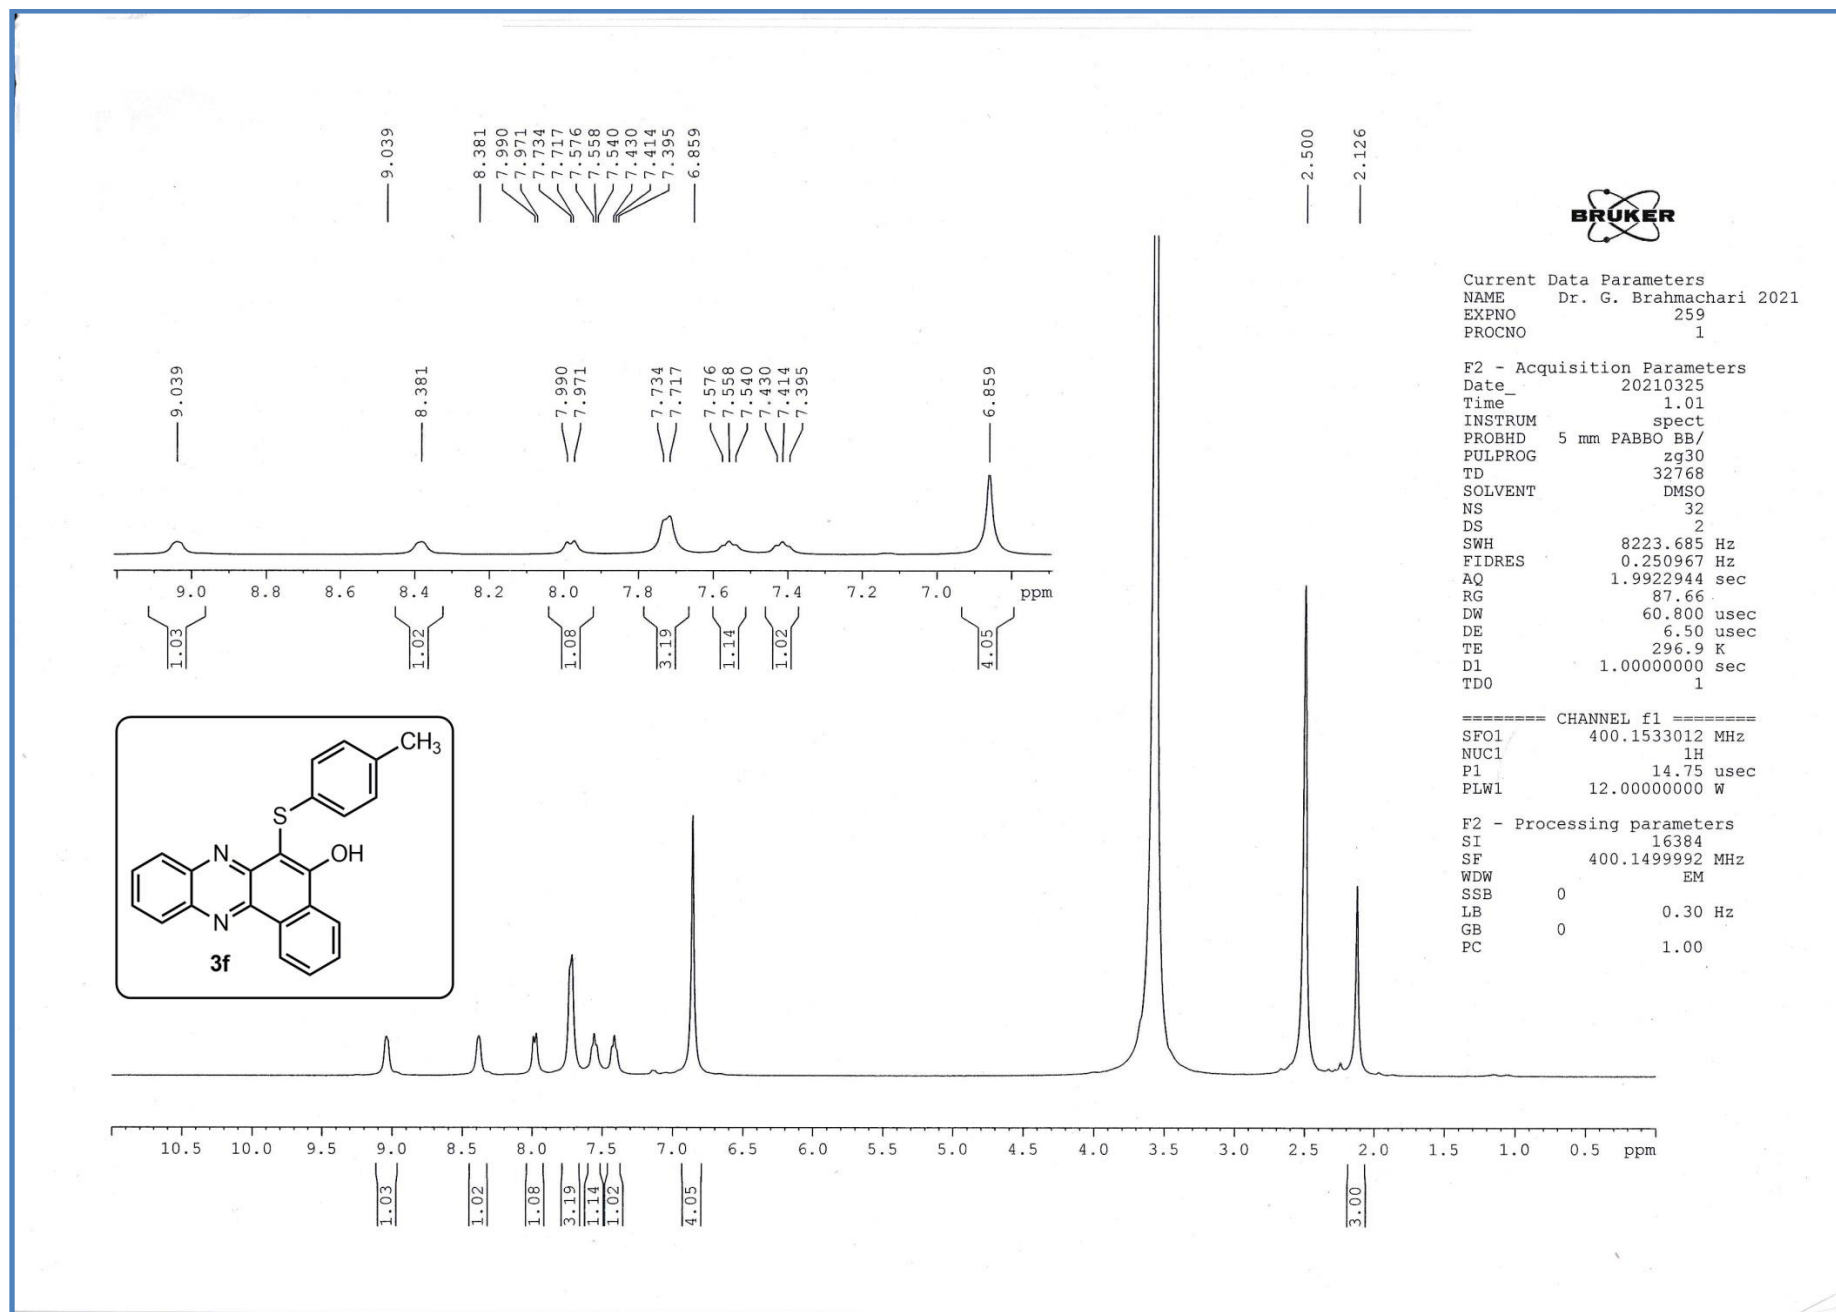

Figure S34. <sup>1</sup>H-NMR spectrum of 6-(*p*-tolylthio)benzo[*a*]phenazin-5-ol (**3f**)

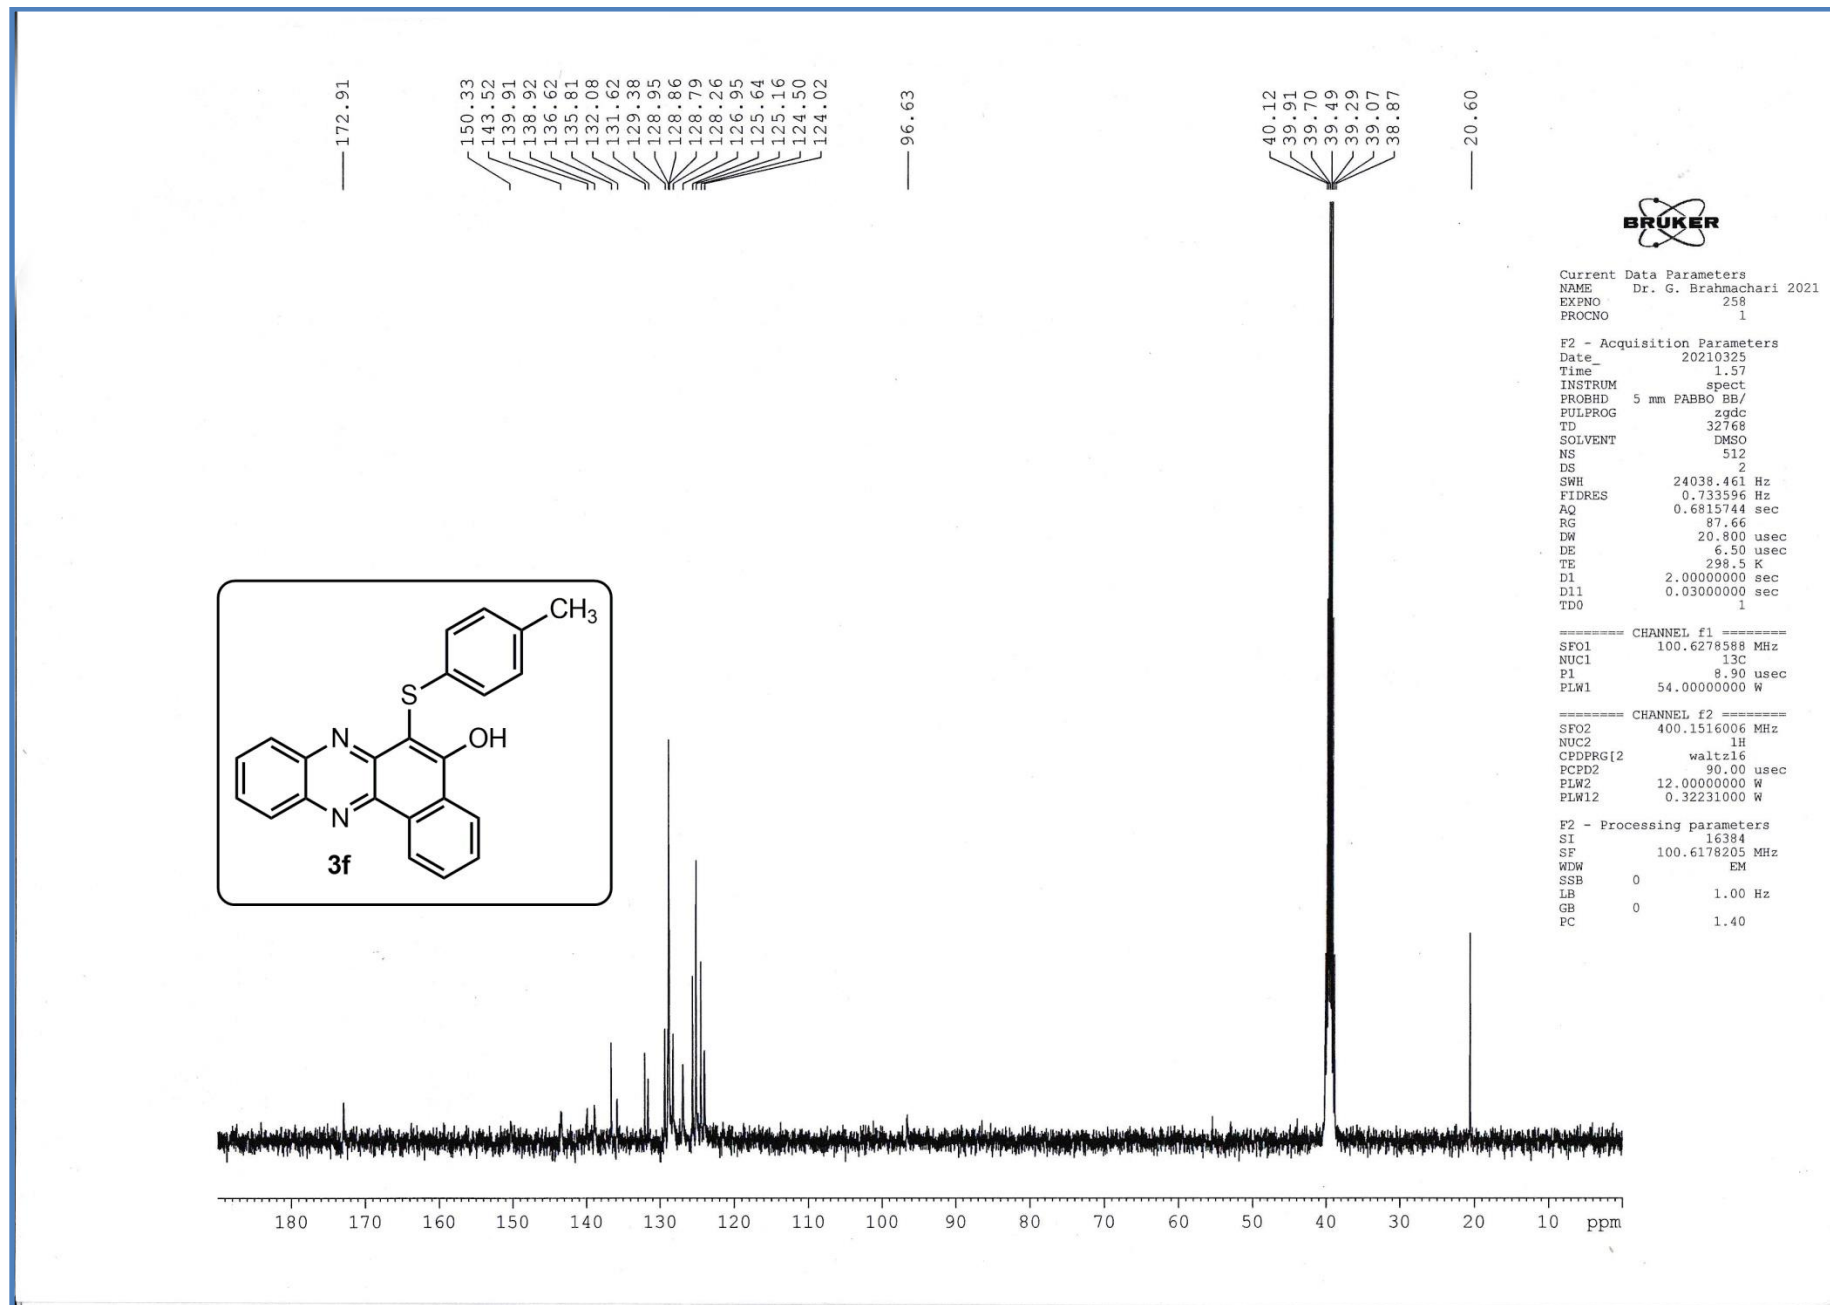

Figure S35. <sup>13</sup>C-NMR spectrum of 6-(*p*-tolylthio)benzo[*a*]phenazin-5-ol (**3f**)

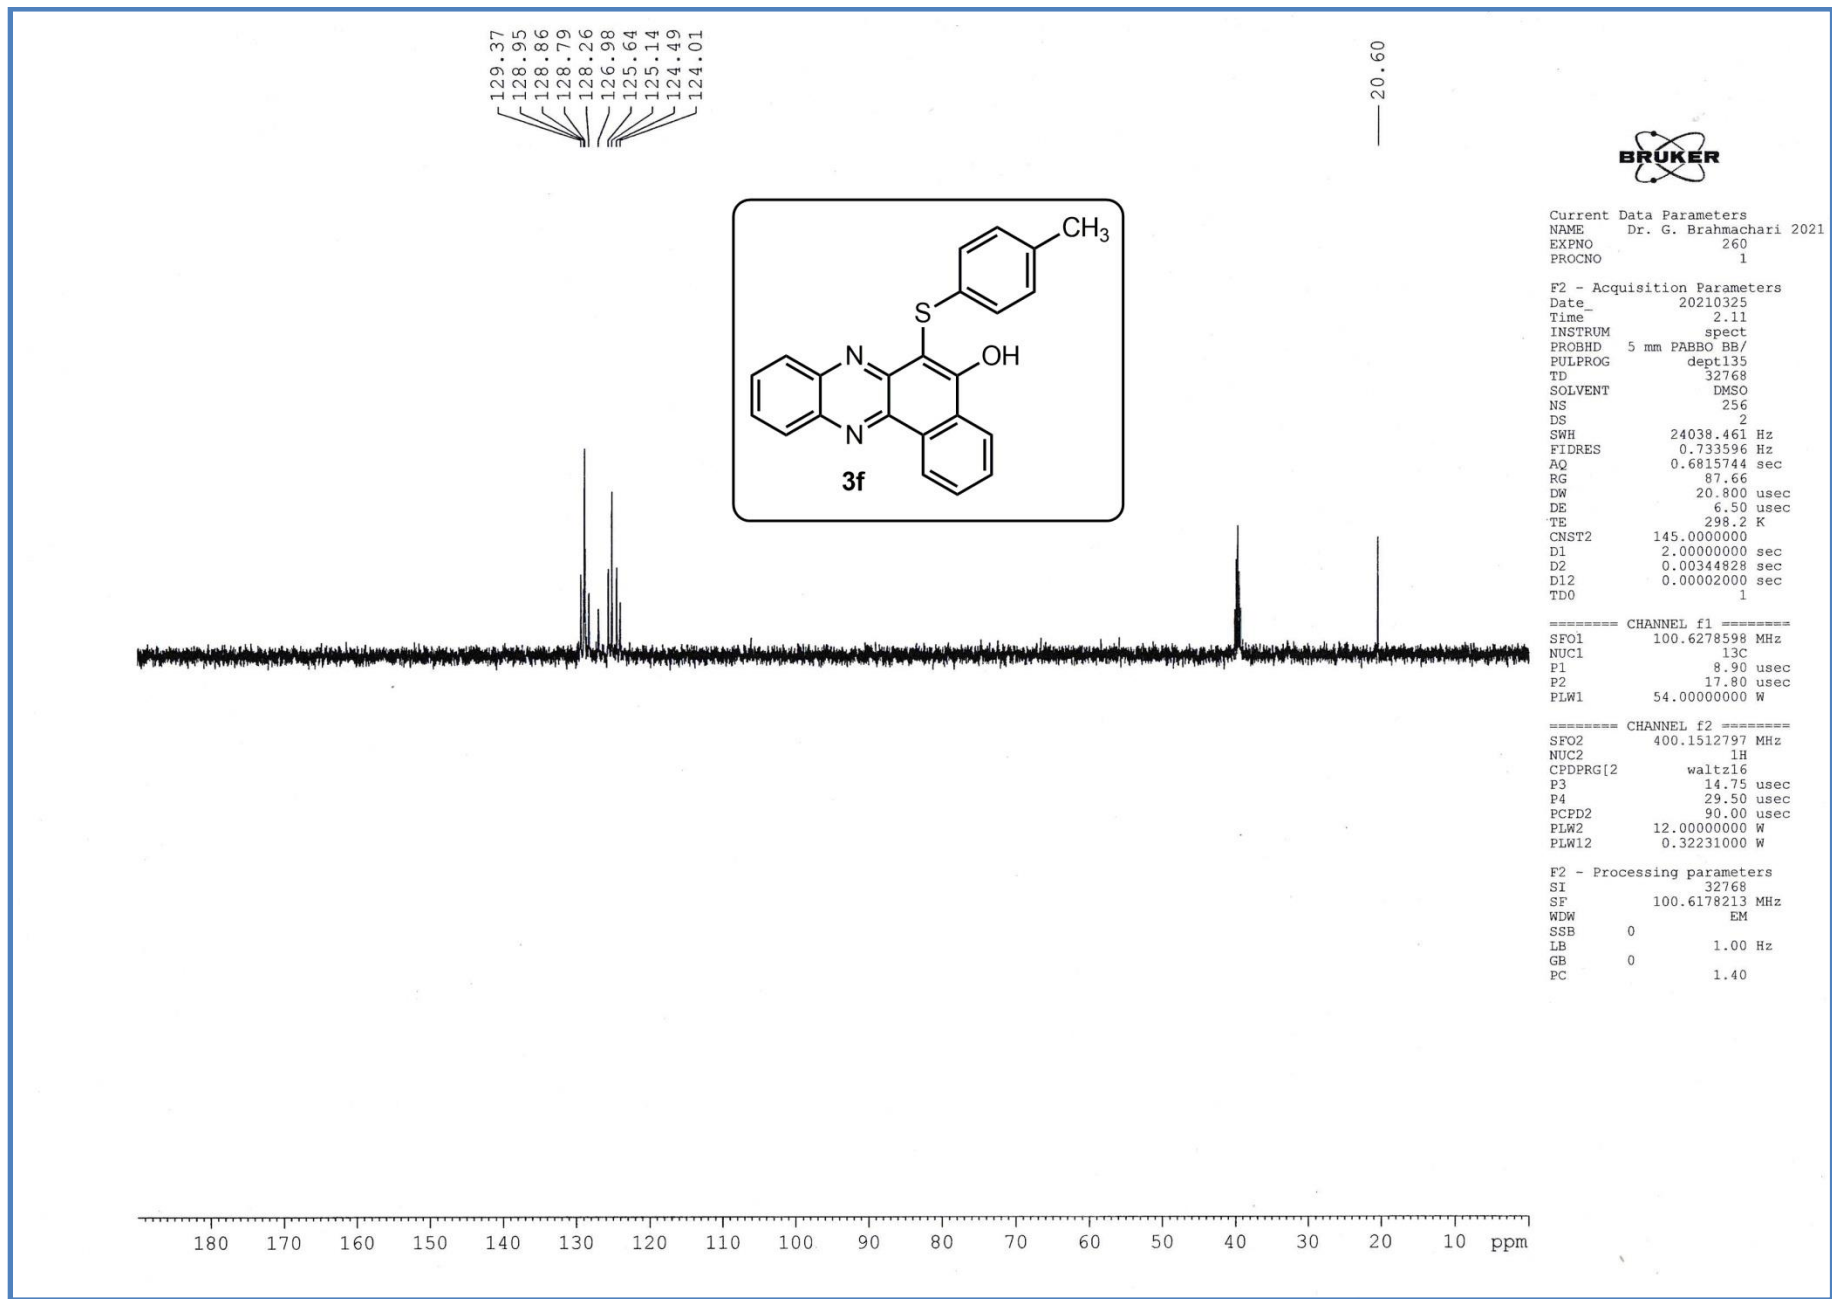

Figure S36. DEPT-135 NMR spectrum of 6-(*p*-tolylthio)benzo[*a*]phenazin-5-ol (**3f**)

## Display Report

### Analysis Info

Analysis Name D:\Data\User data\2019\OCT\GB-39.d  
Method Tune\_pos\_Mid.m  
Sample Name GB-39  
Comment

Acquisition Date 10/28/2019 11:02:03 AM

Operator IISER Kalyani  
Instrument maXis impact 8282001.00127

### Acquisition Parameter

|             |          |                      |          |                  |           |
|-------------|----------|----------------------|----------|------------------|-----------|
| Source Type | ESI      | Ion Polarity         | Positive | Set Nebulizer    | 0.4 Bar   |
| Focus       | Active   | Set Capillary        | 3400 V   | Set Dry Heater   | 200 °C    |
| Scan Begin  | 50 m/z   | Set End Plate Offset | -500 V   | Set Dry Gas      | 4.0 l/min |
| Scan End    | 3000 m/z | Set Charging Voltage | 2000 V   | Set Divert Valve | Source    |
|             |          | Set Corona           | 0 nA     | Set APCI Heater  | 0 °C      |

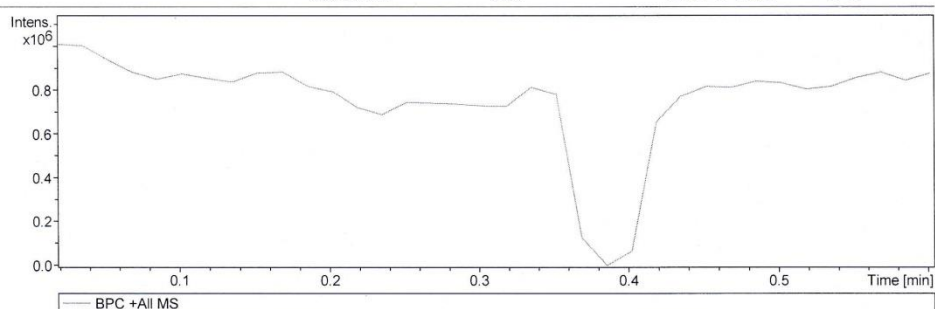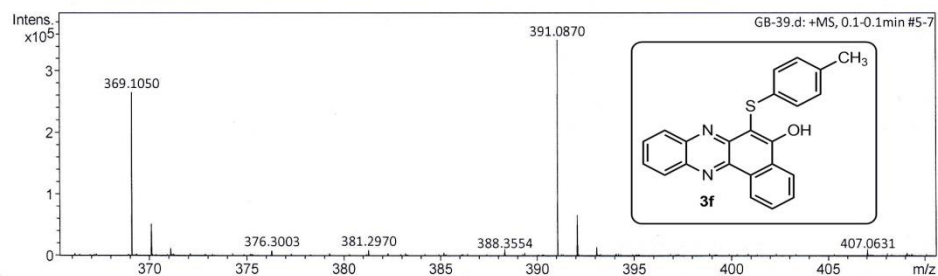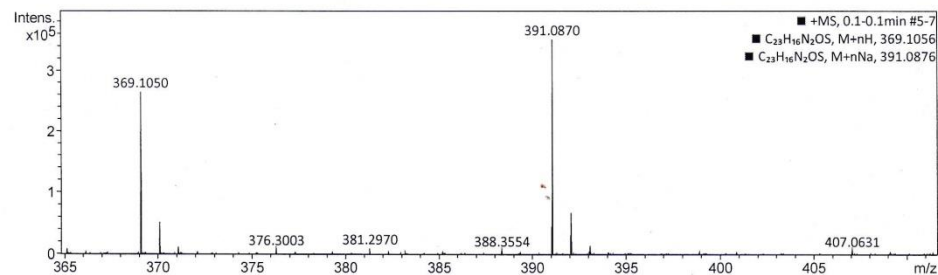

GB-39.d

Bruker Compass DataAnalysis 4.1

printed: 10/28/2019 11:06:55 AM

by: IISER Kalyani

Page 1 of 1

Figure S37. High-resolution Mass spectra of 6-(*p*-tolylthio)benzo[*a*]phenazin-5-ol (**3f**)



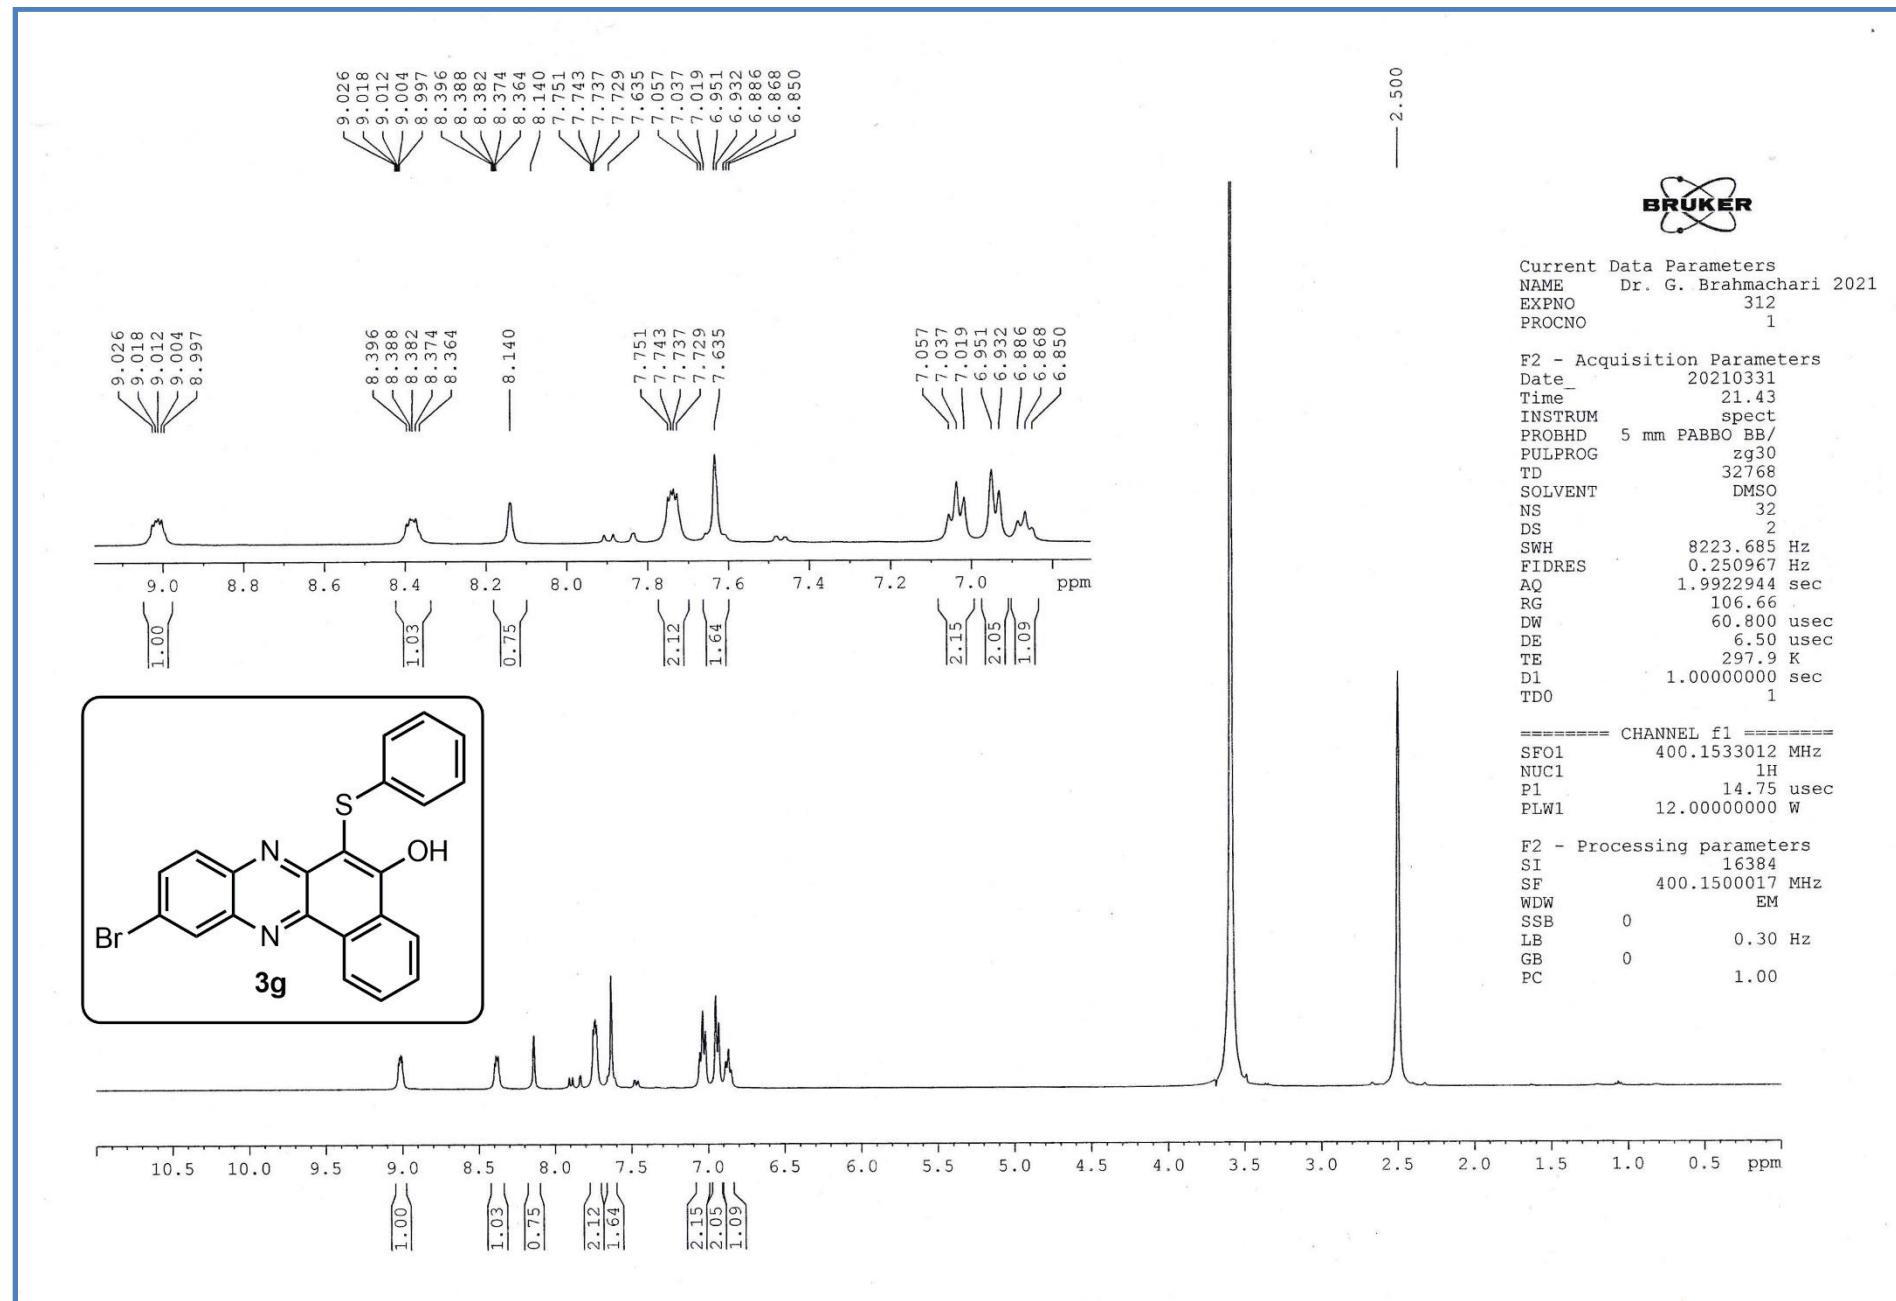

Figure S38. <sup>1</sup>H-NMR spectrum of 10-bromo-6-(phenylthio)benzo[*a*]phenazin-5-ol (**3g**)

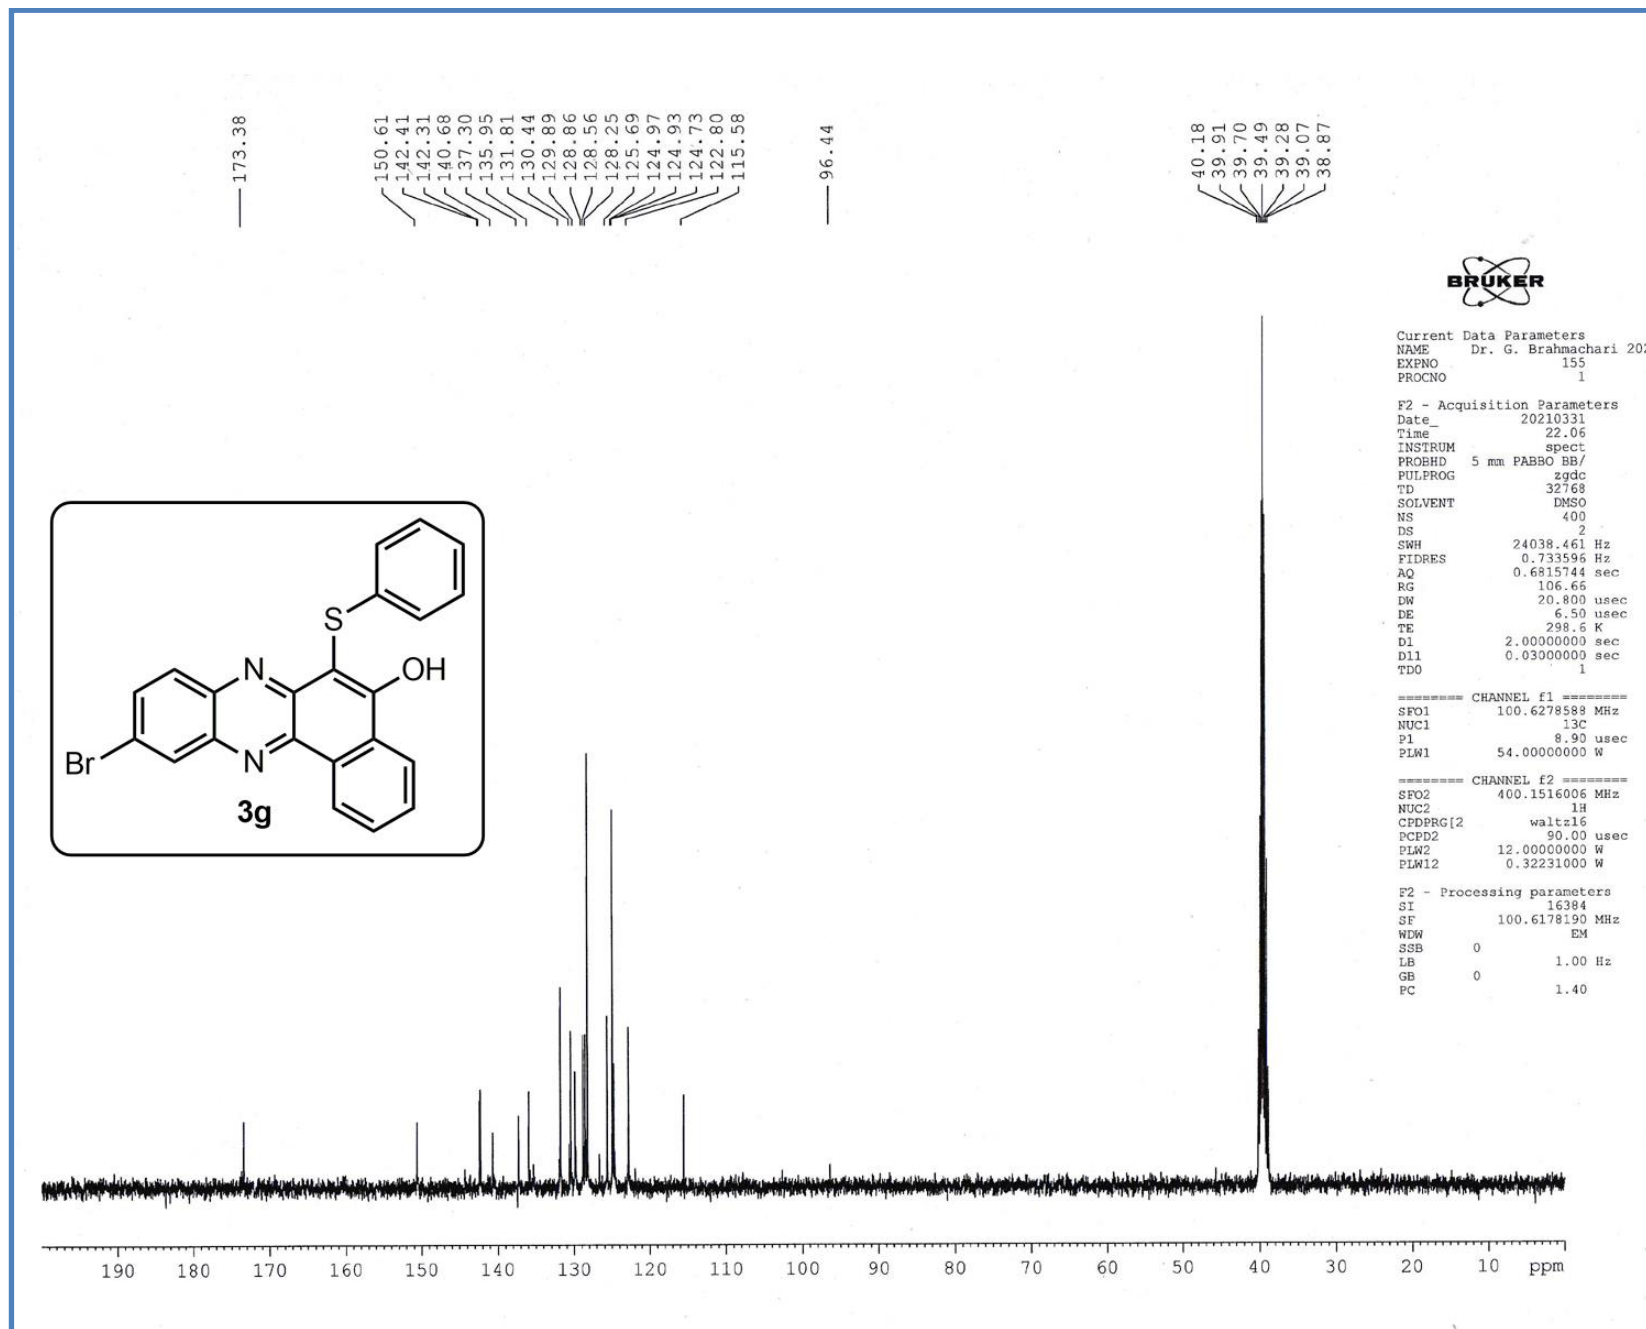

Figure S39. <sup>13</sup>C-NMR spectrum of 10-bromo-6-(phenylthio)benzo[*a*]phenazin-5-ol (**3g**)

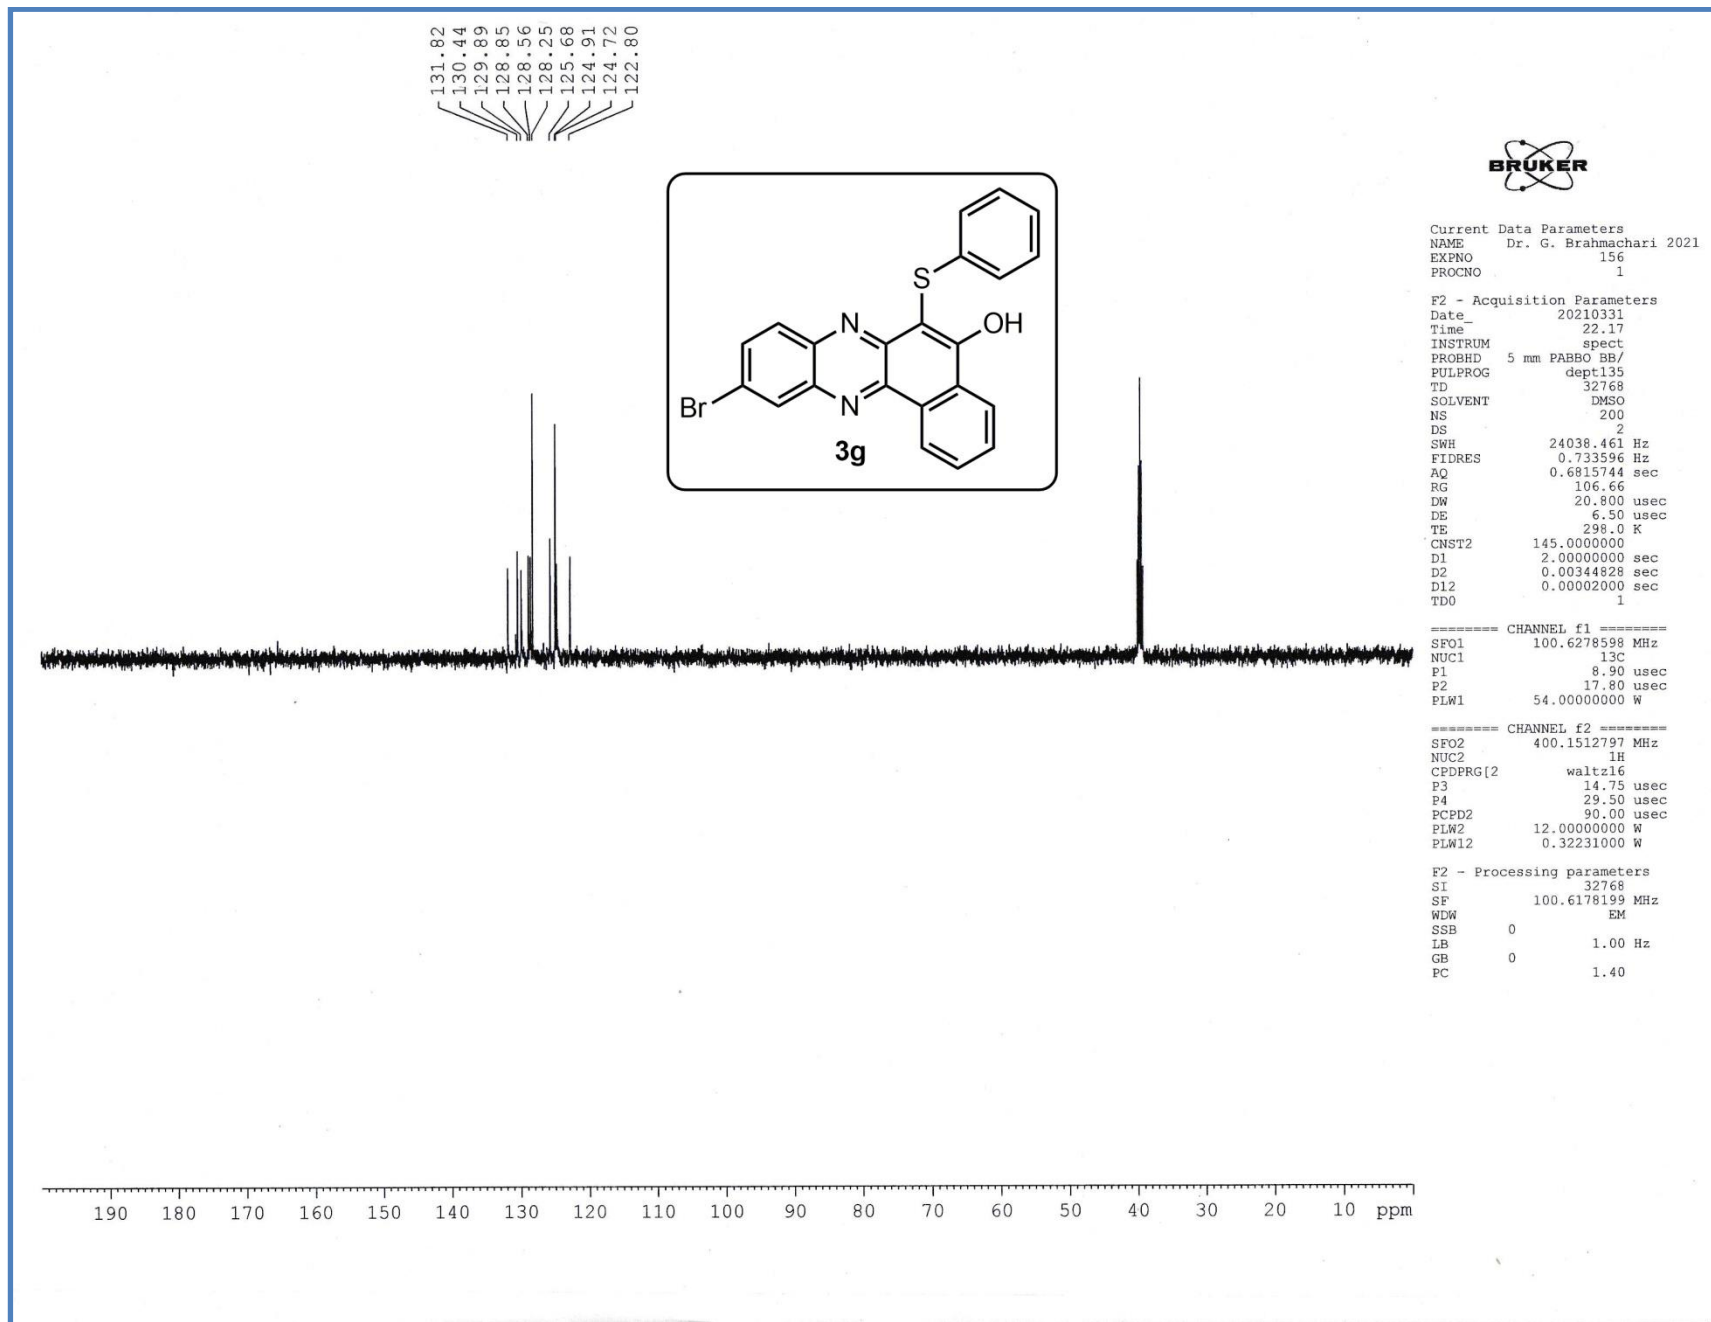

Figure S40. DEPT-135 NMR spectrum of 10-bromo-6-(phenylthio)benzo[*a*]phenazin-5-ol (**3g**)

## Display Report

### Analysis Info

Analysis Name D:\Data\User data\2019\NOV\GB-41.d  
Method Tune\_pos\_Mid.m  
Sample Name GB-41  
Comment

Acquisition Date 11/4/2019 12:47:03 PM

Operator IISER Kalyani  
Instrument maXis impact 8282001.00127

### Acquisition Parameter

|             |          |                      |          |                  |           |
|-------------|----------|----------------------|----------|------------------|-----------|
| Source Type | ESI      | Ion Polarity         | Positive | Set Nebulizer    | 0.4 Bar   |
| Focus       | Active   | Set Capillary        | 3400 V   | Set Dry Heater   | 200 °C    |
| Scan Begin  | 50 m/z   | Set End Plate Offset | -500 V   | Set Dry Gas      | 4.0 l/min |
| Scan End    | 3000 m/z | Set Charging Voltage | 2000 V   | Set Divert Valve | Source    |
|             |          | Set Corona           | 0 nA     | Set APCI Heater  | 0 °C      |

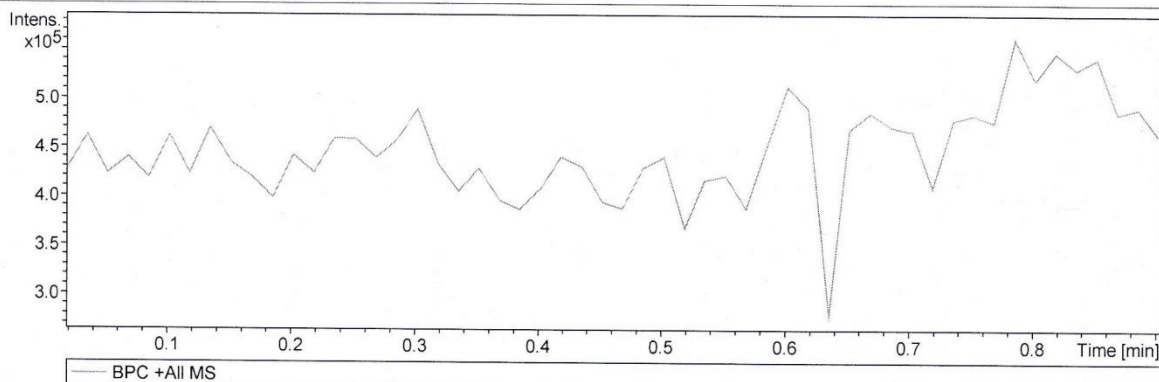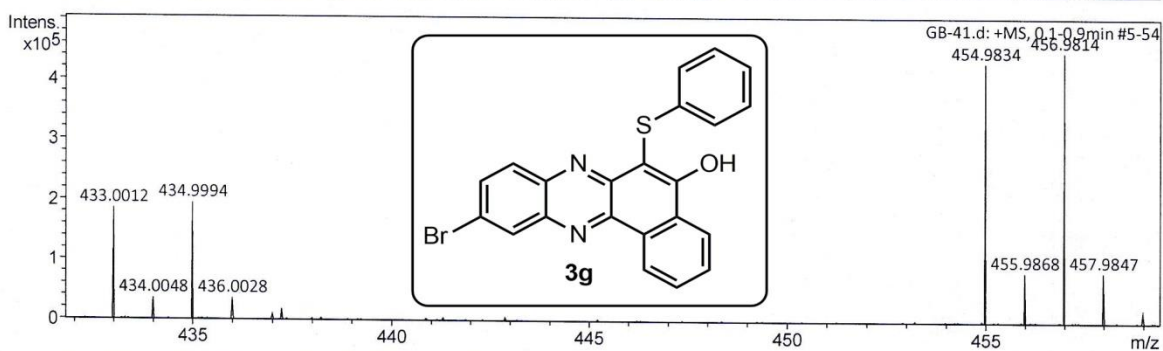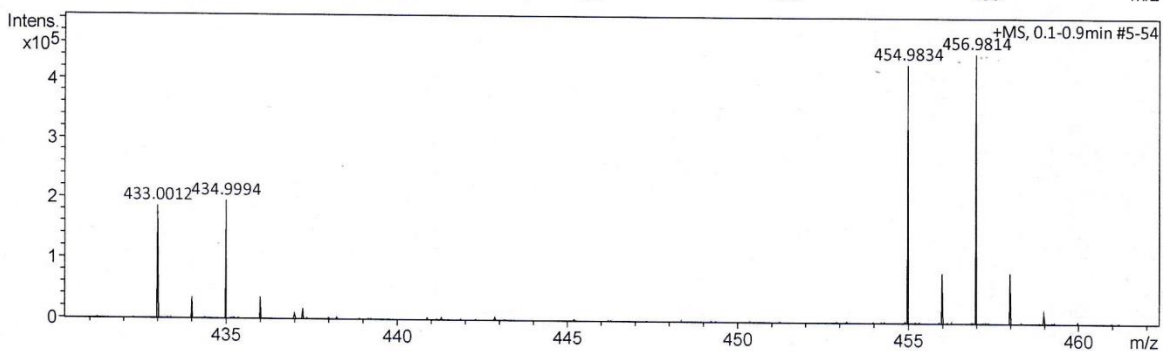

GB-41.d

Bruker Compass DataAnalysis 4.1

printed: 11/4/2019 12:57:23 PM

by: IISER Kalyani

Page 1 of 1

Figure S41. High-resolution Mass spectra of 10-bromo-6-(phenylthio)benzo[a]phenazin-5-ol (**3g**)

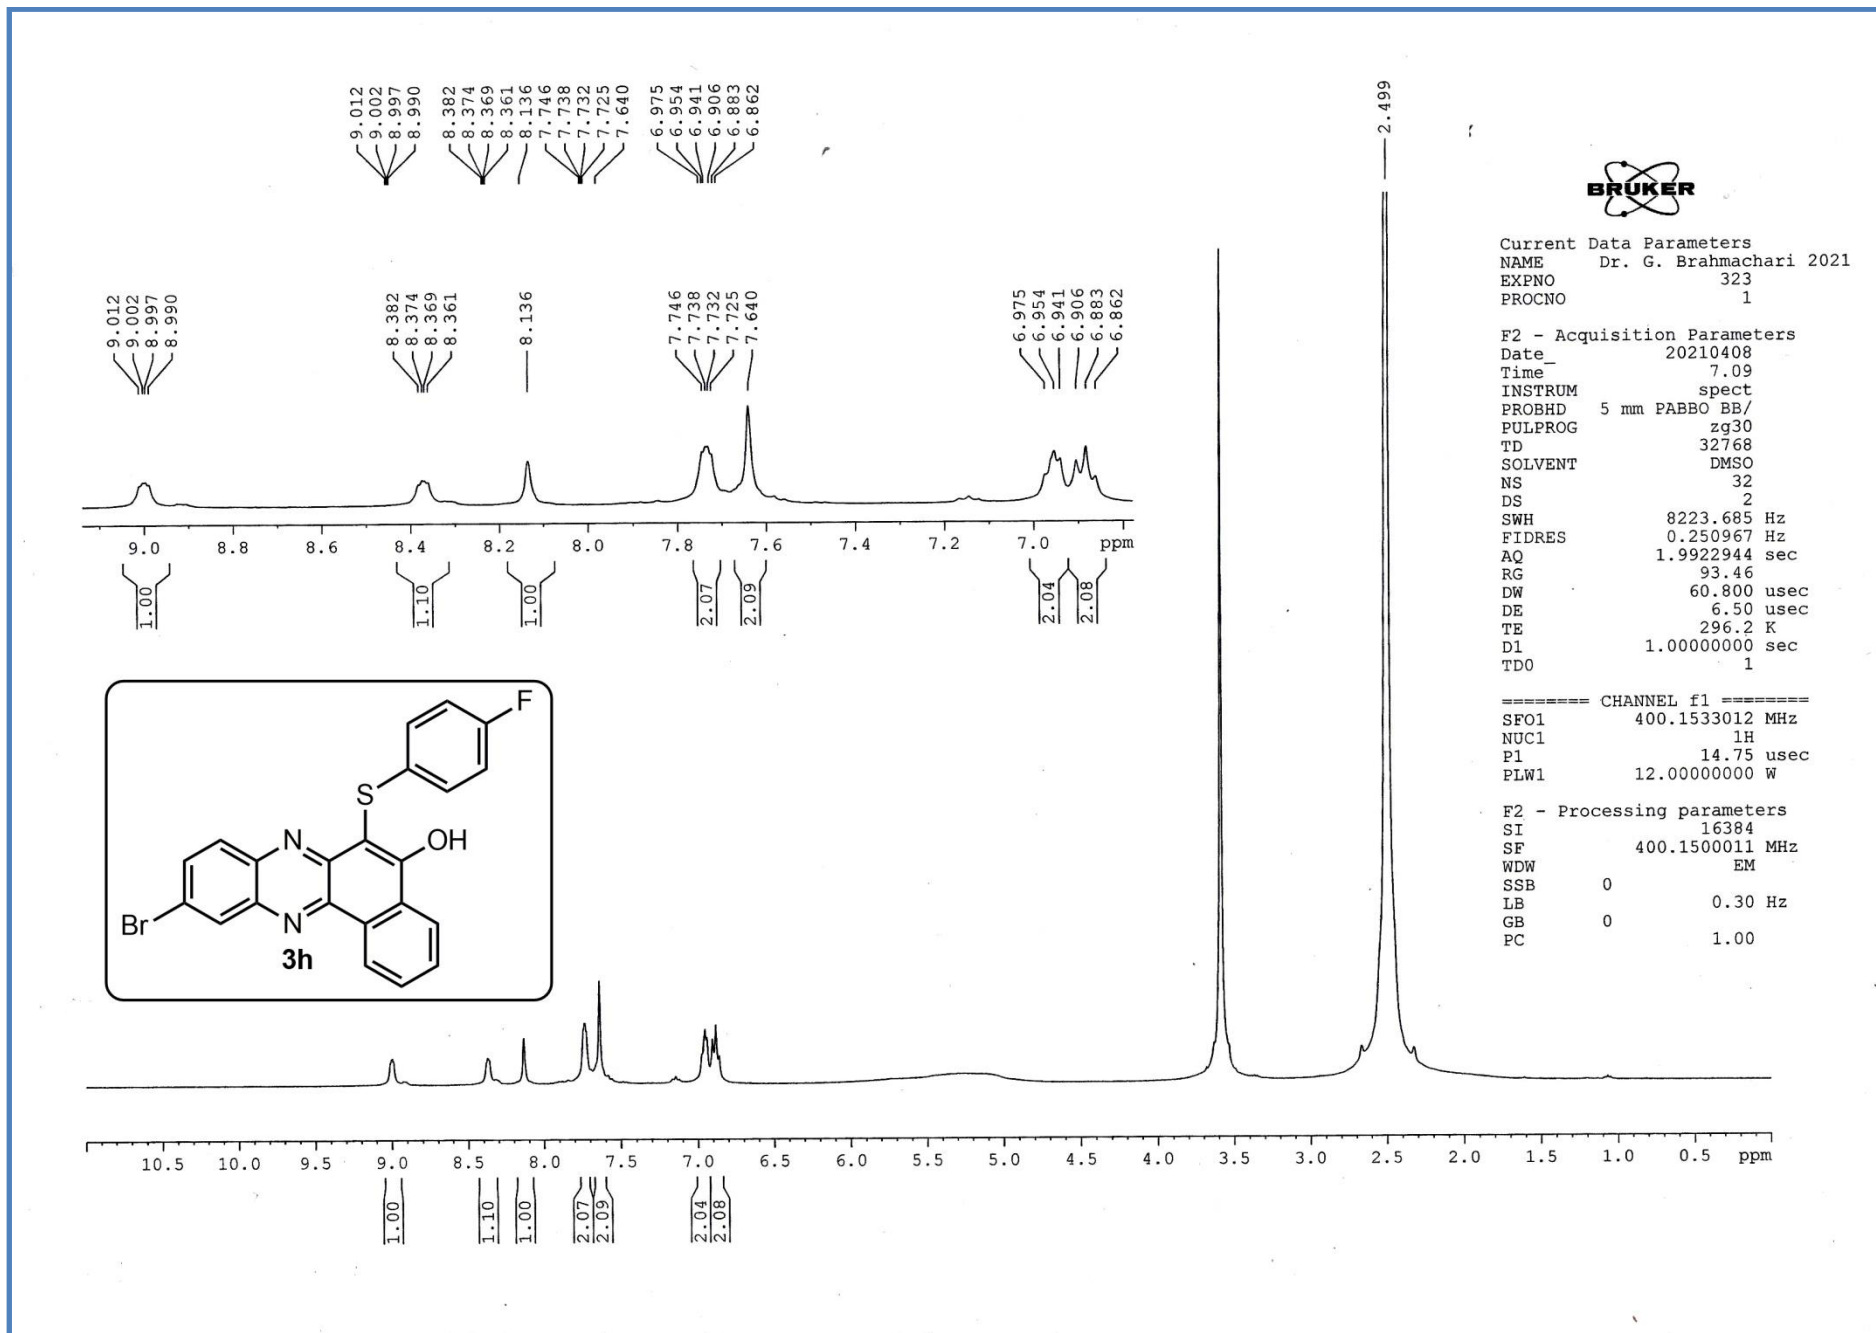

Figure S42. <sup>1</sup>H-NMR spectrum of 10-bromo-6-((4-fluorophenyl)thio)benzo[*a*]phenazin-5-ol (**3h**)

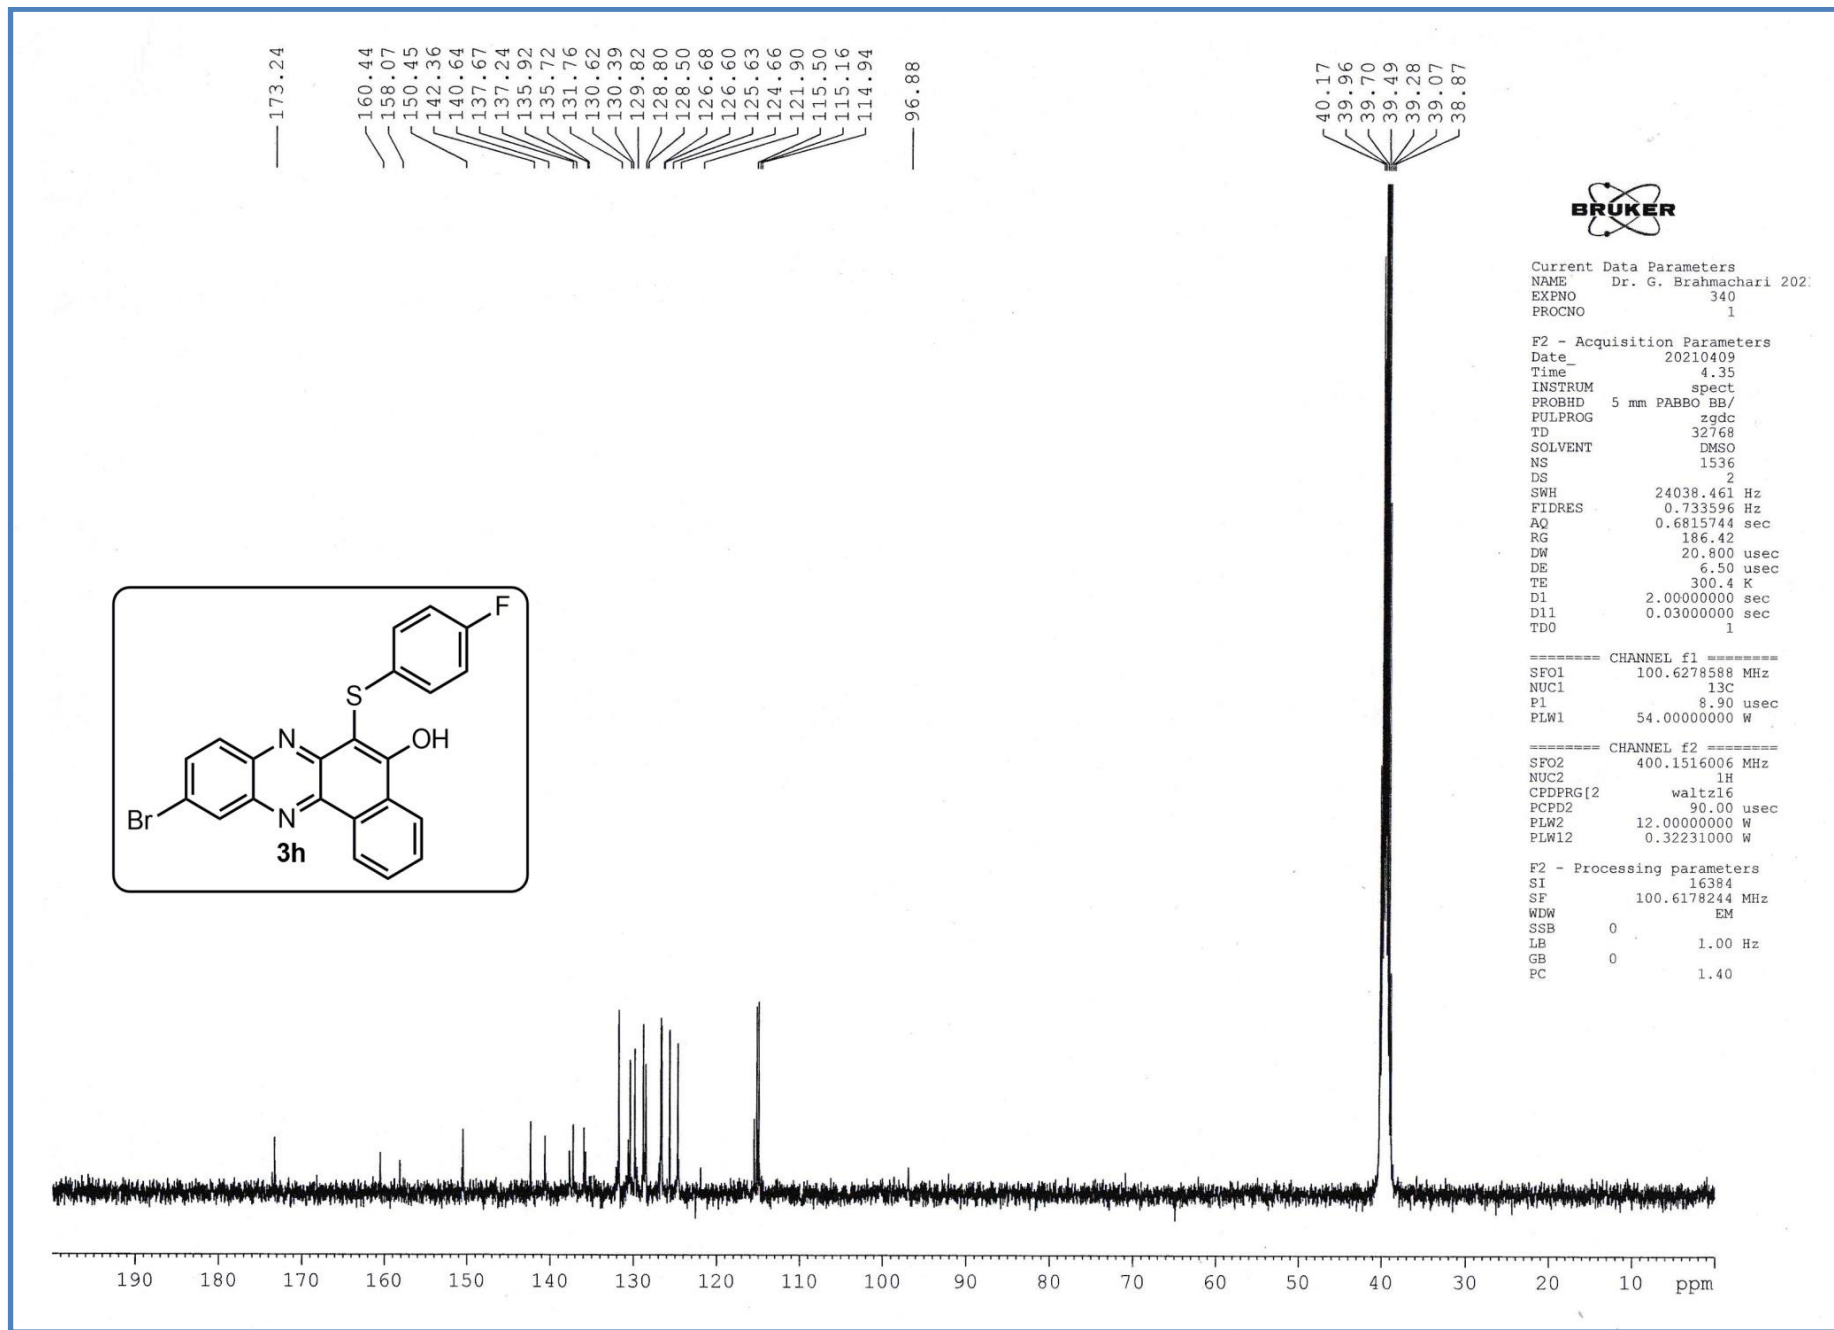

Figure S43. <sup>13</sup>C-NMR spectrum of 10-bromo-6-((4-fluorophenyl)thio)benzo[a]phenazin-5-ol (**3h**)

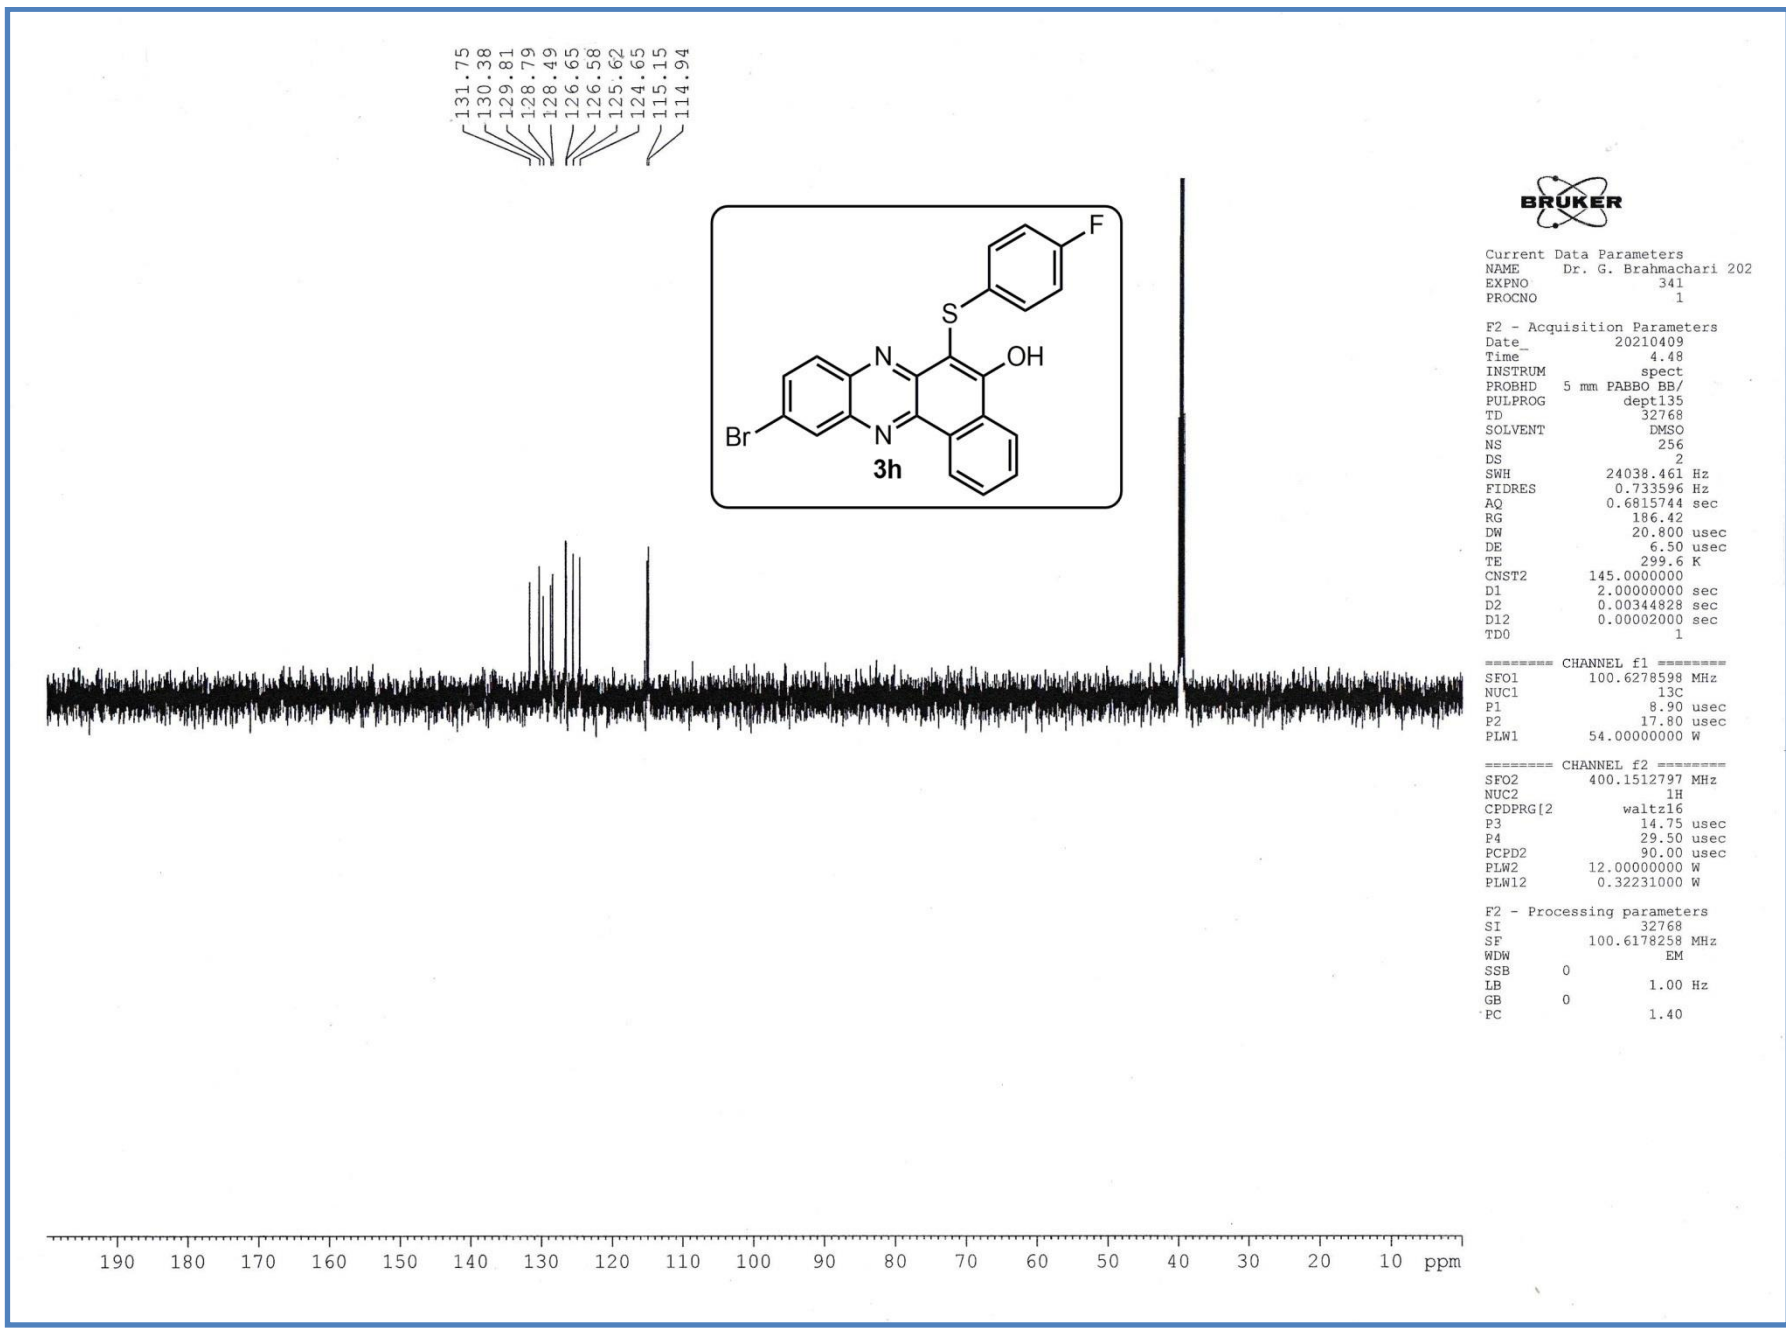

Figure S40. DEPT-135 NMR spectrum of 10-bromo-6-((4-fluorophenyl)thio)benzo[a]phenazin-5-ol (**3h**)

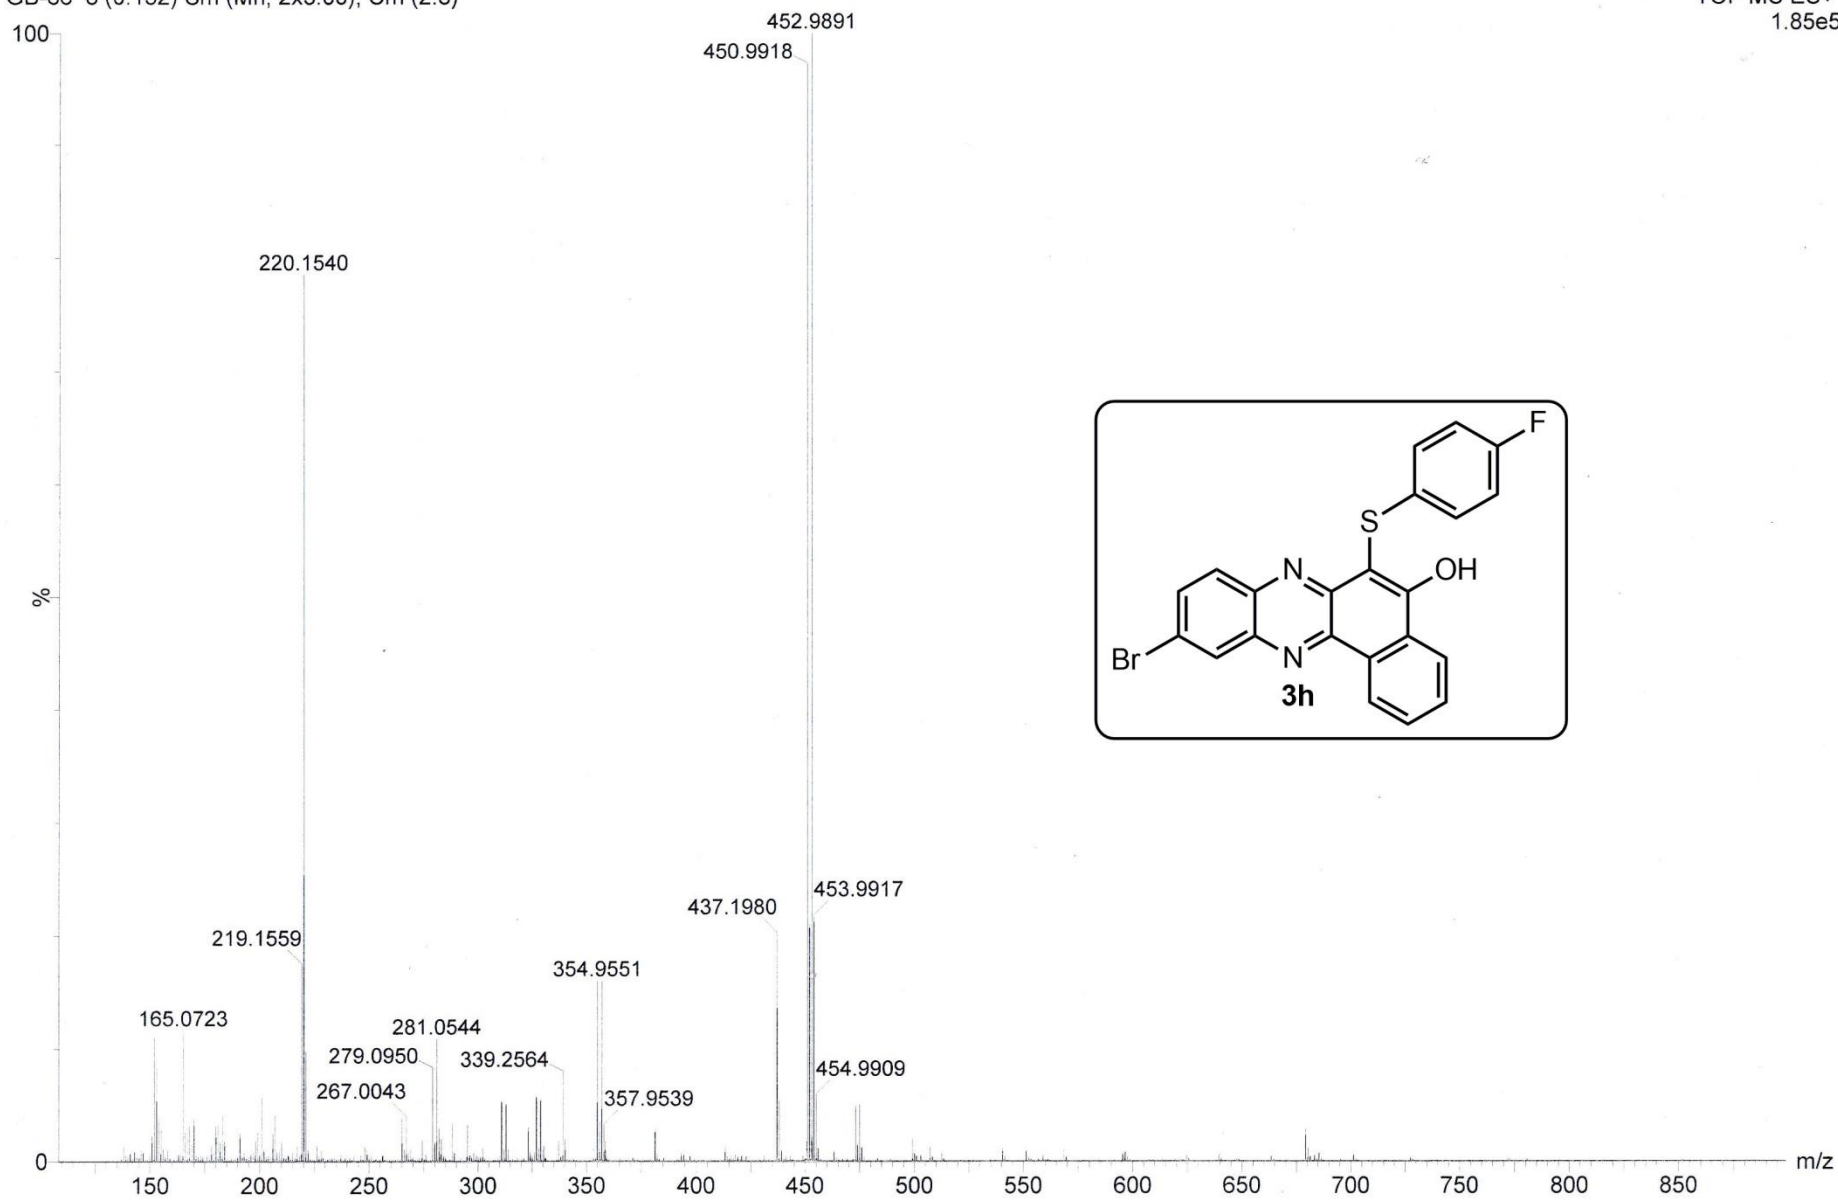Figure S41. High-resolution Mass spectra of 10-bromo-6-((4-fluorophenyl)thio)benzo[*a*]phenazin-5-ol (**3h**)



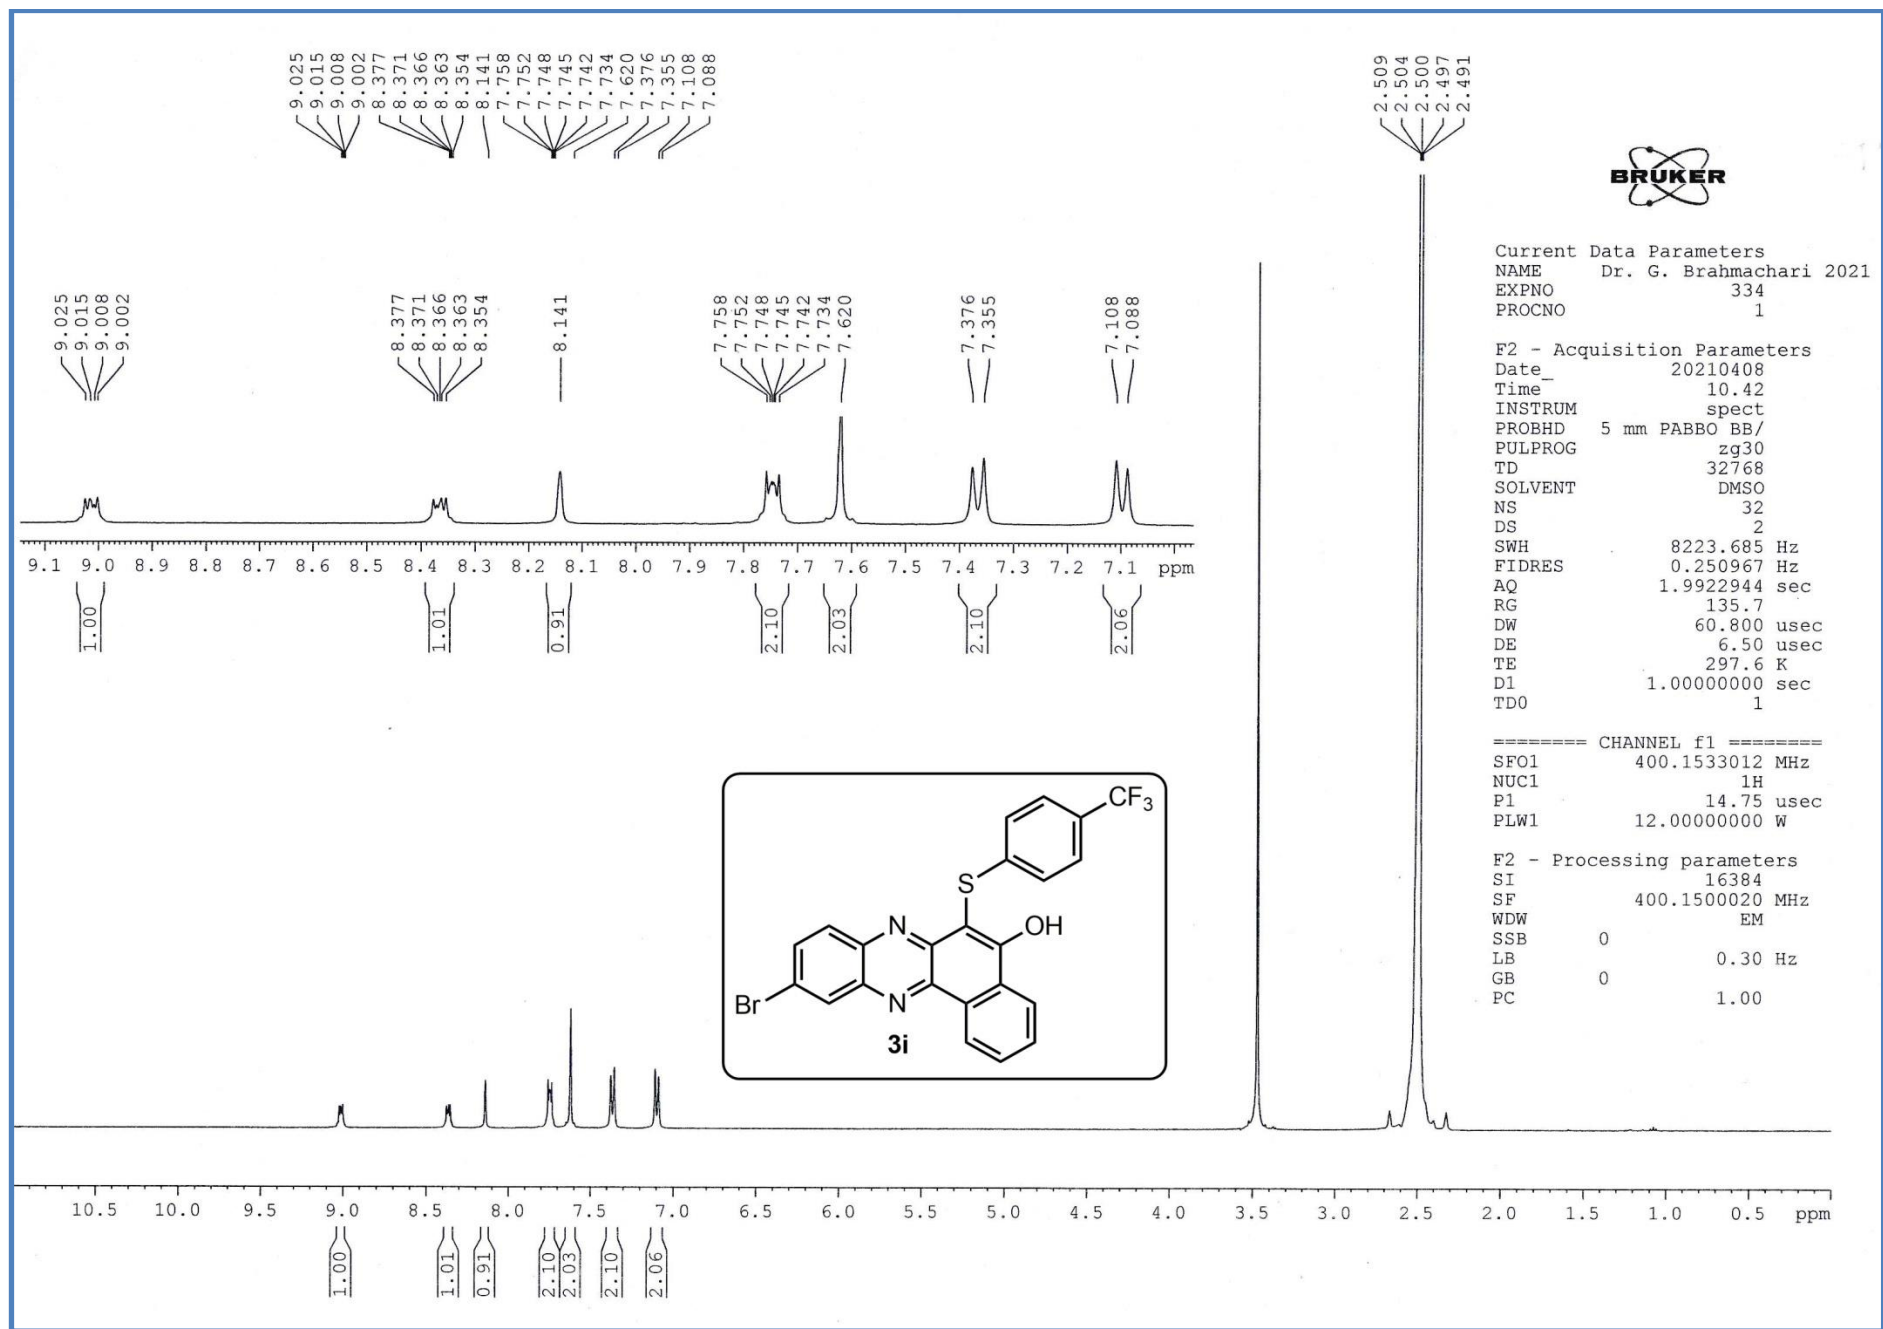

Figure S42. <sup>1</sup>H-NMR spectrum of 10-bromo-6-((4-(trifluoromethyl)phenyl)thio)benzo[*a*]phenazin-5-ol (**3i**)

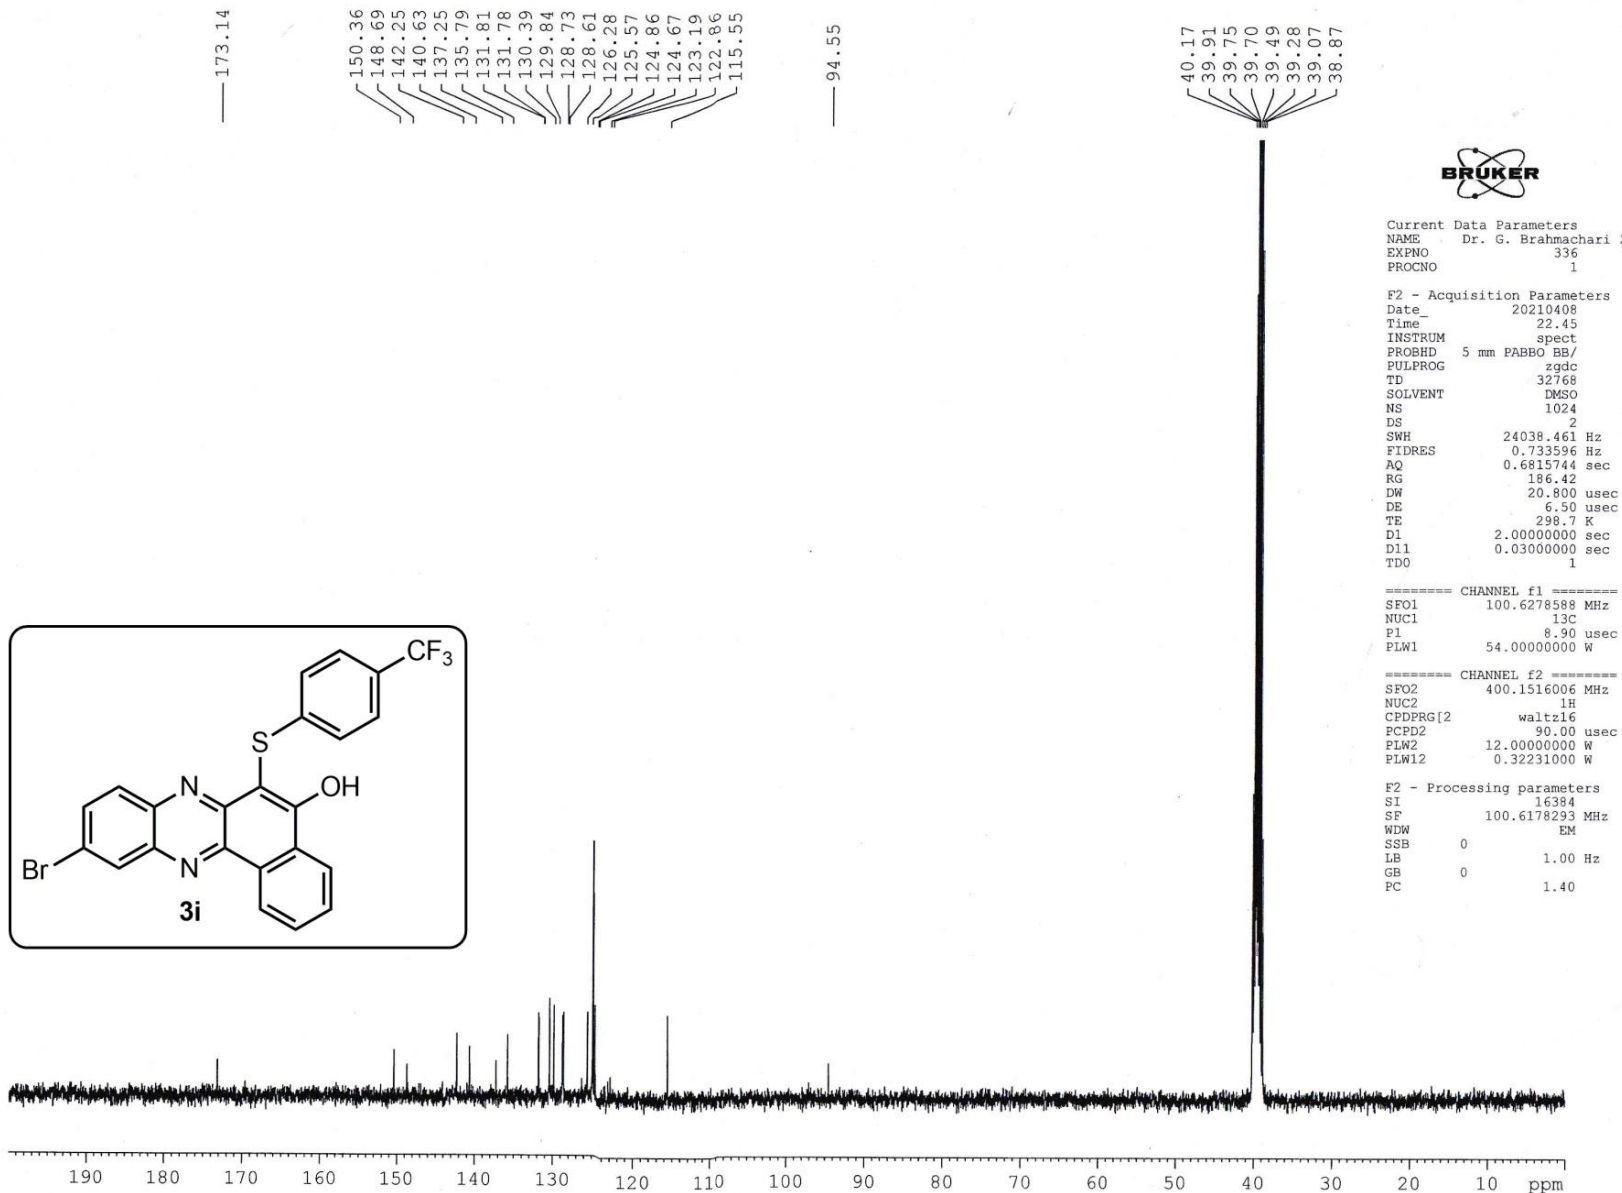

Figure S43. <sup>13</sup>C-NMR spectrum of 10-bromo-6-((4-(trifluoromethyl)phenyl)thio)benzo[*a*]phenazin-5-ol (**3i**)

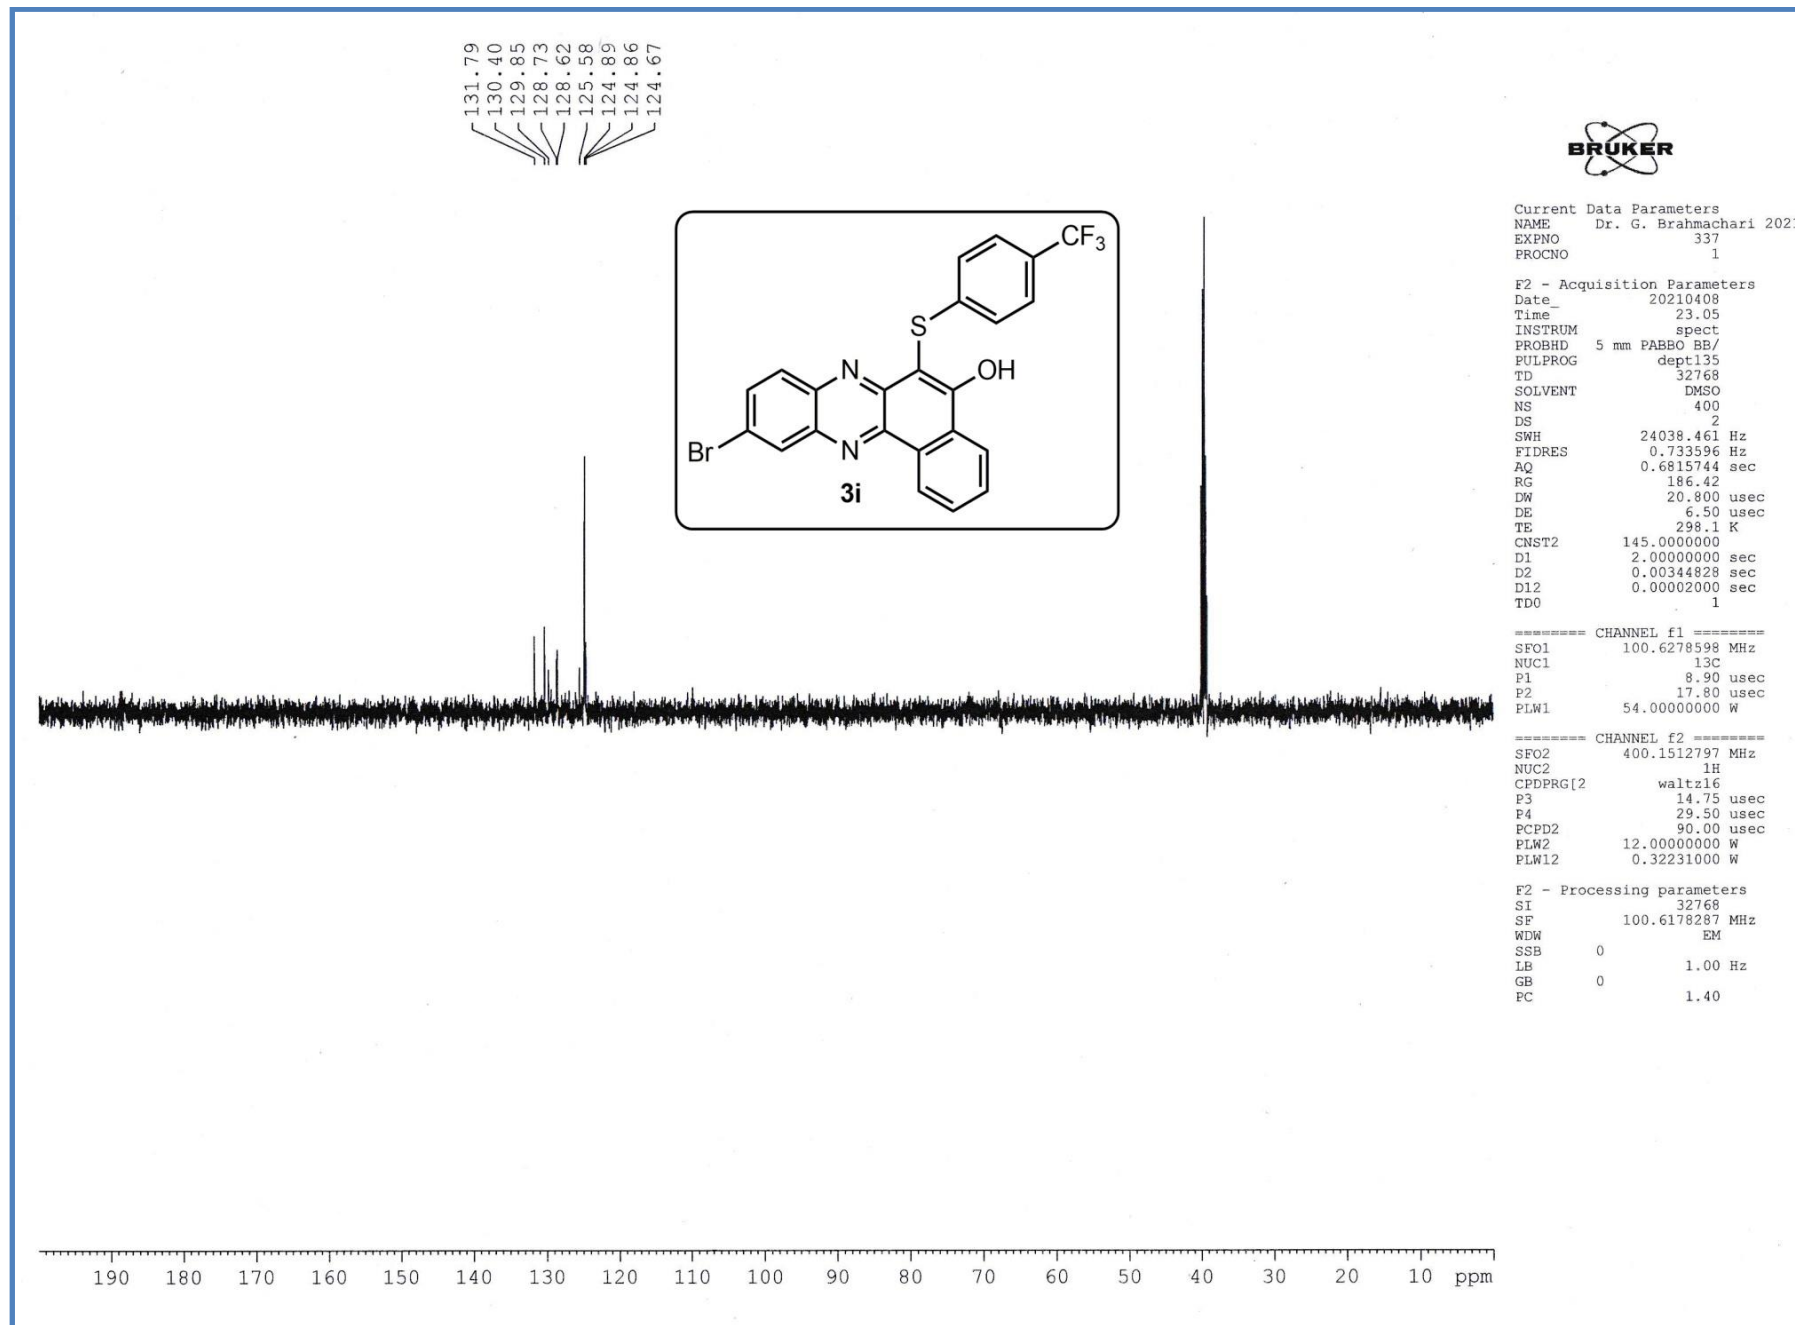

Figure S44. DEPT-135 NMR spectrum of 10-bromo-6-((4-(trifluoromethyl)phenyl)thio)benzo[*a*]phenazin-5-ol (**3i**)

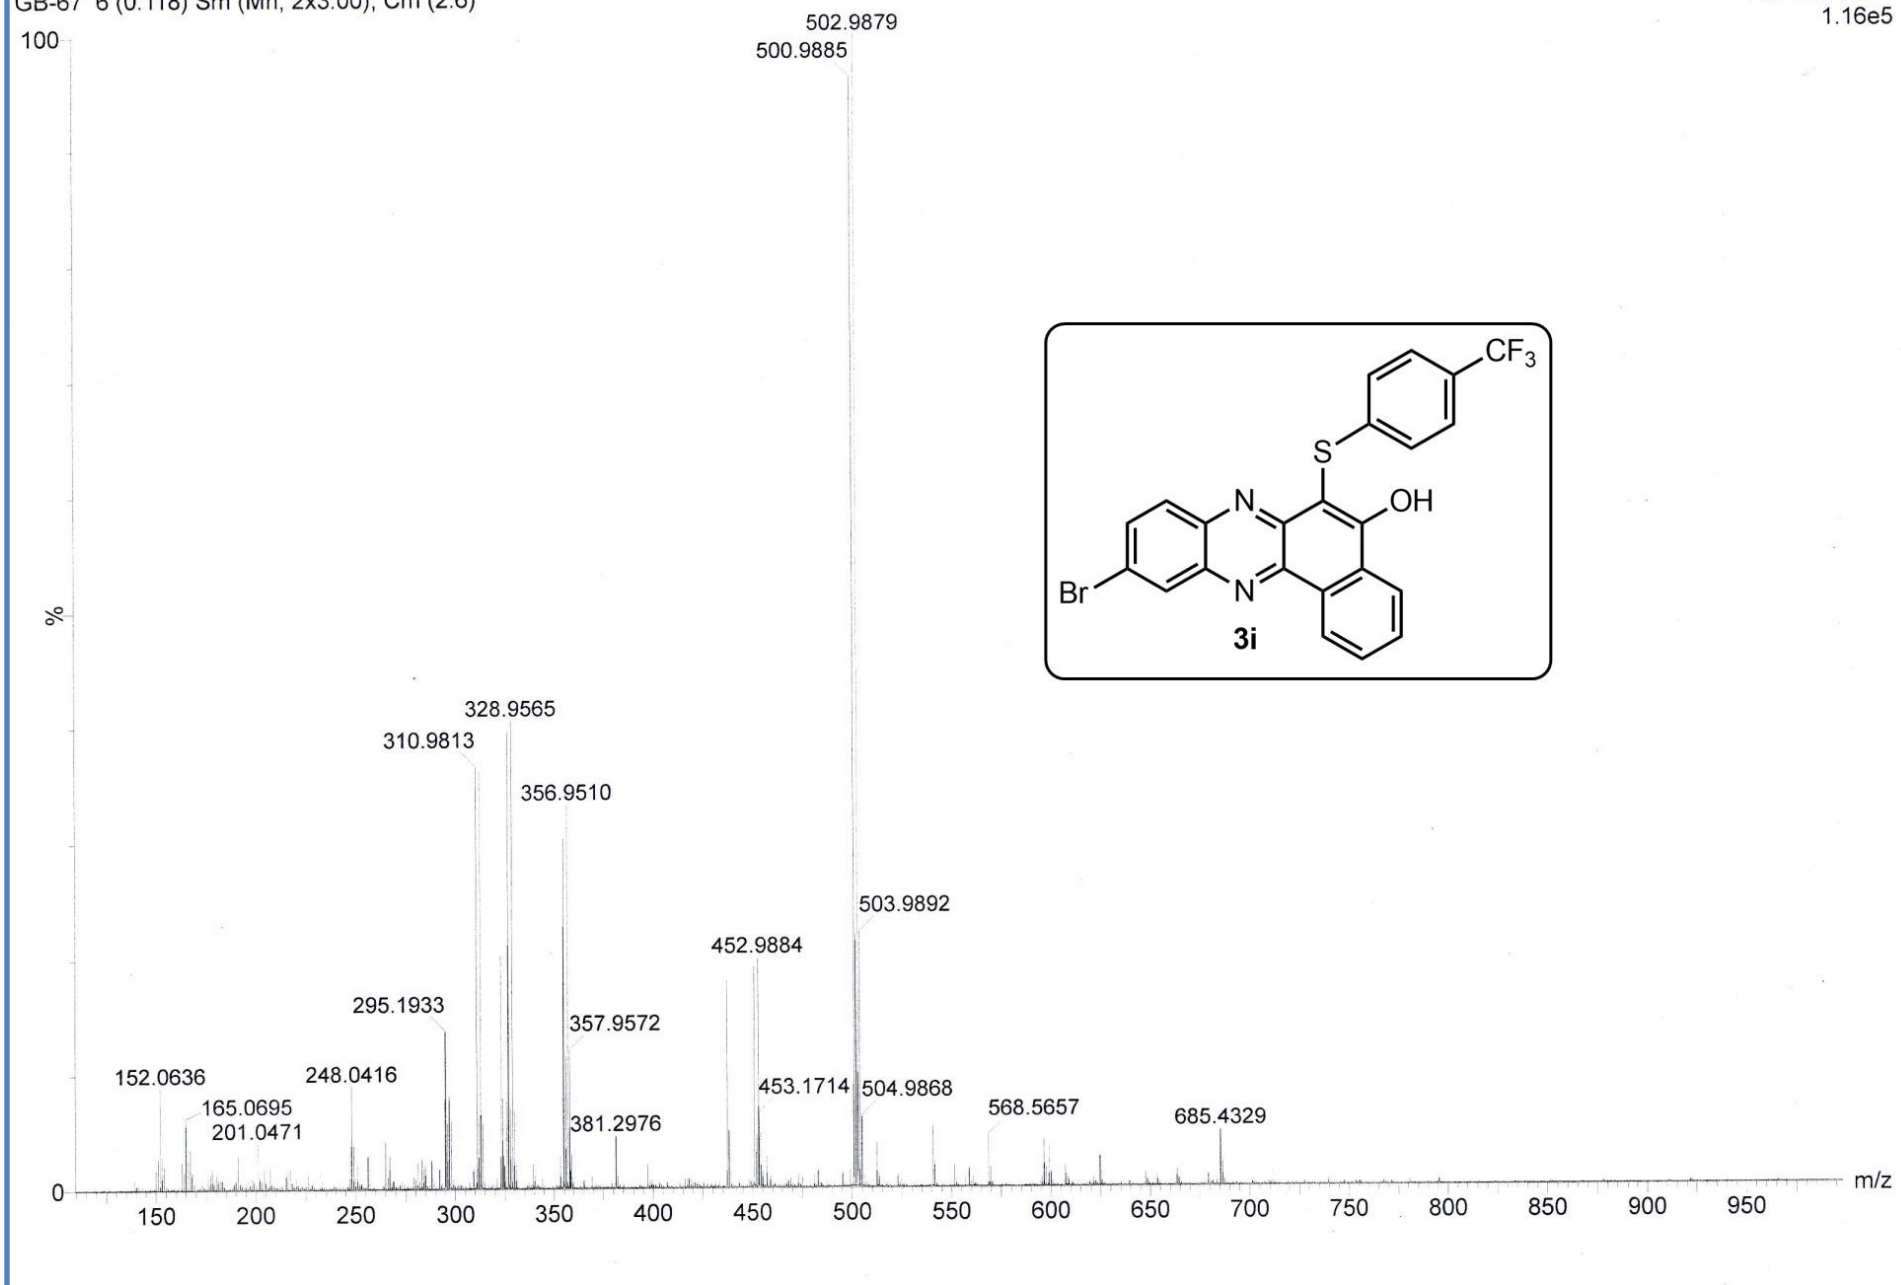Figure S45. High-resolution Mass spectra 10-bromo-6-((4-(trifluoromethyl)phenyl)thio)benzo[*a*]phenazin-5-ol (**3i**)

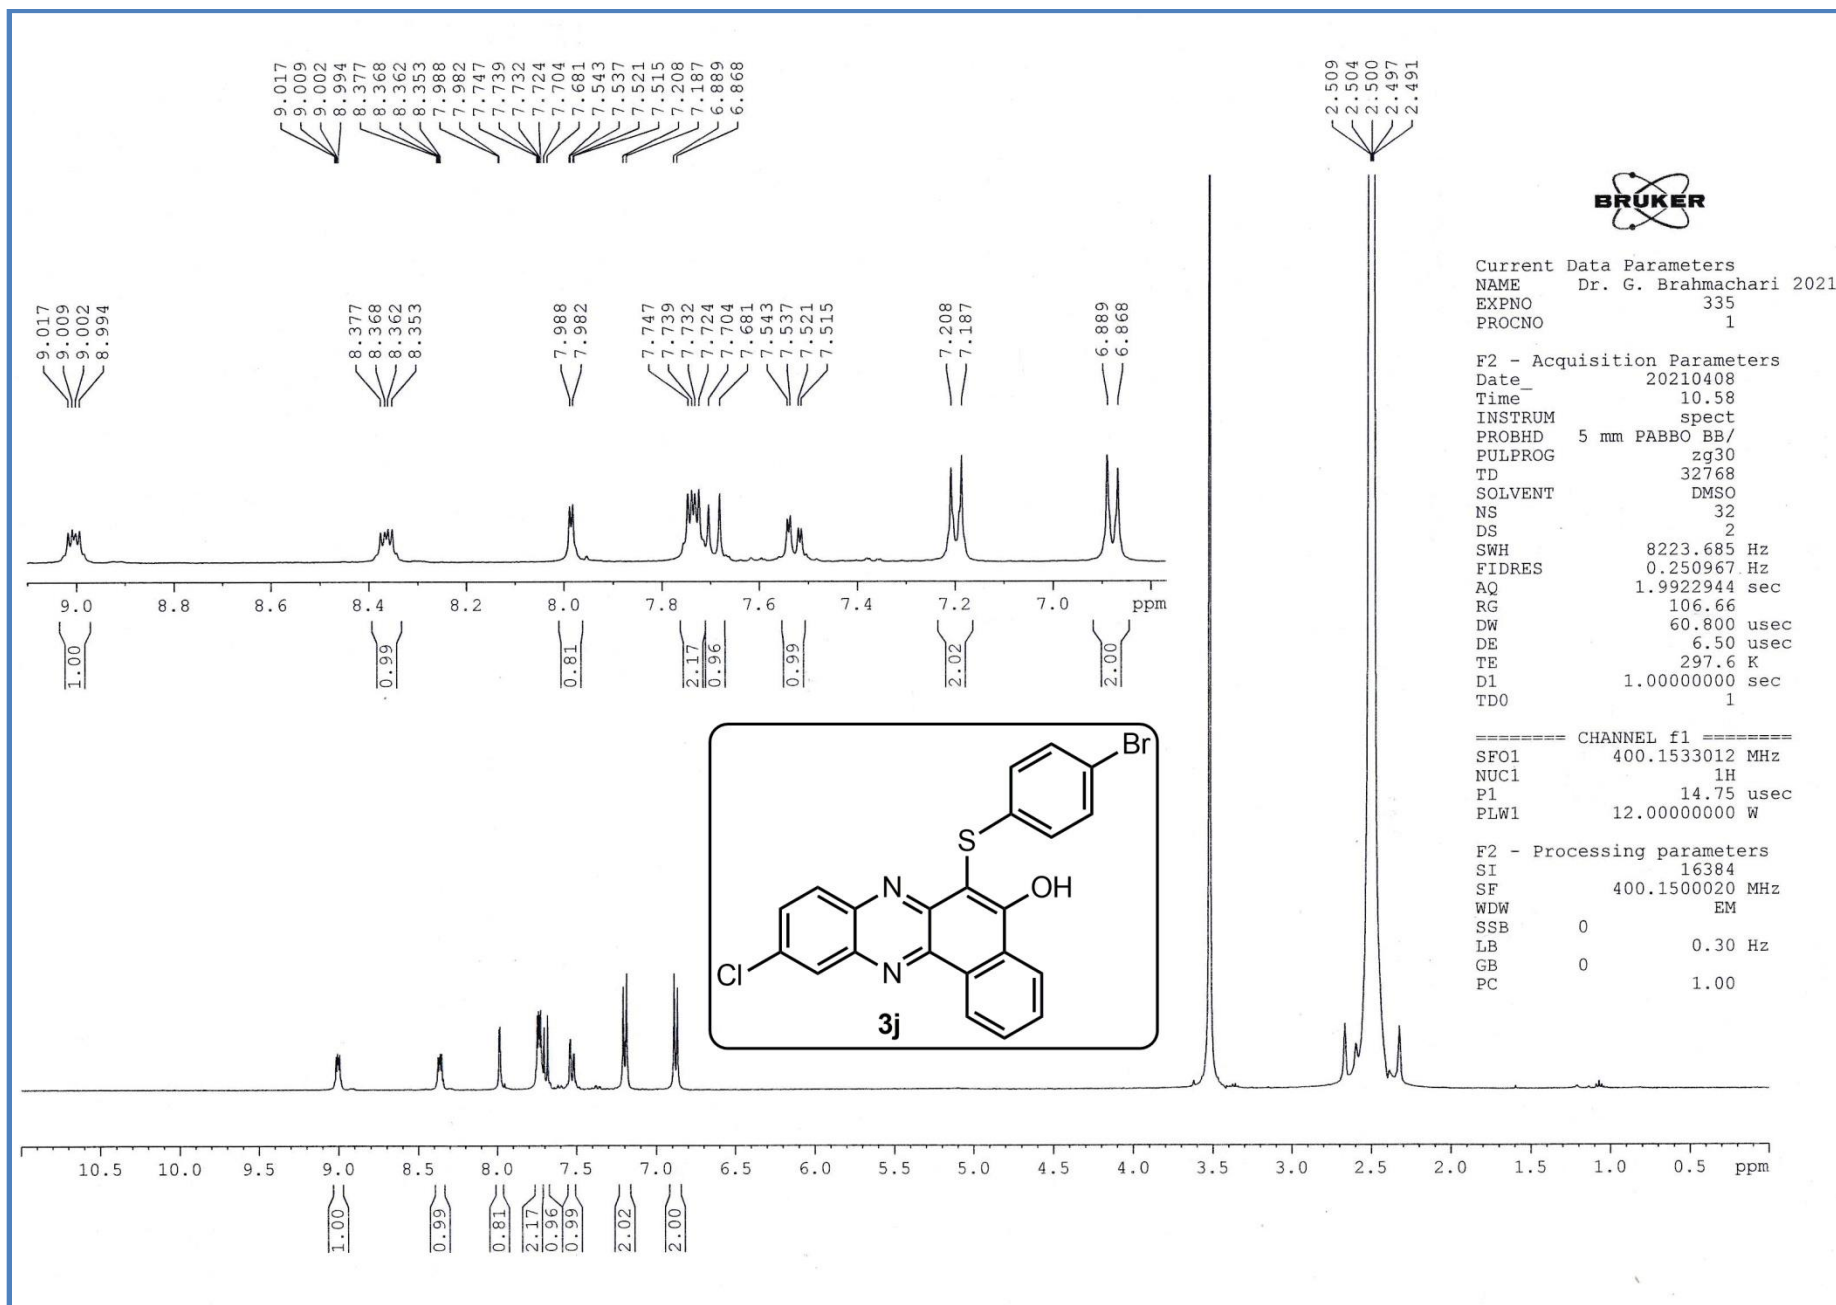

Figure S46. <sup>1</sup>H-NMR spectrum of 6-((4-bromophenyl)thio)-10-chlorobenzo[a]phenazin-5-ol (**3j**)

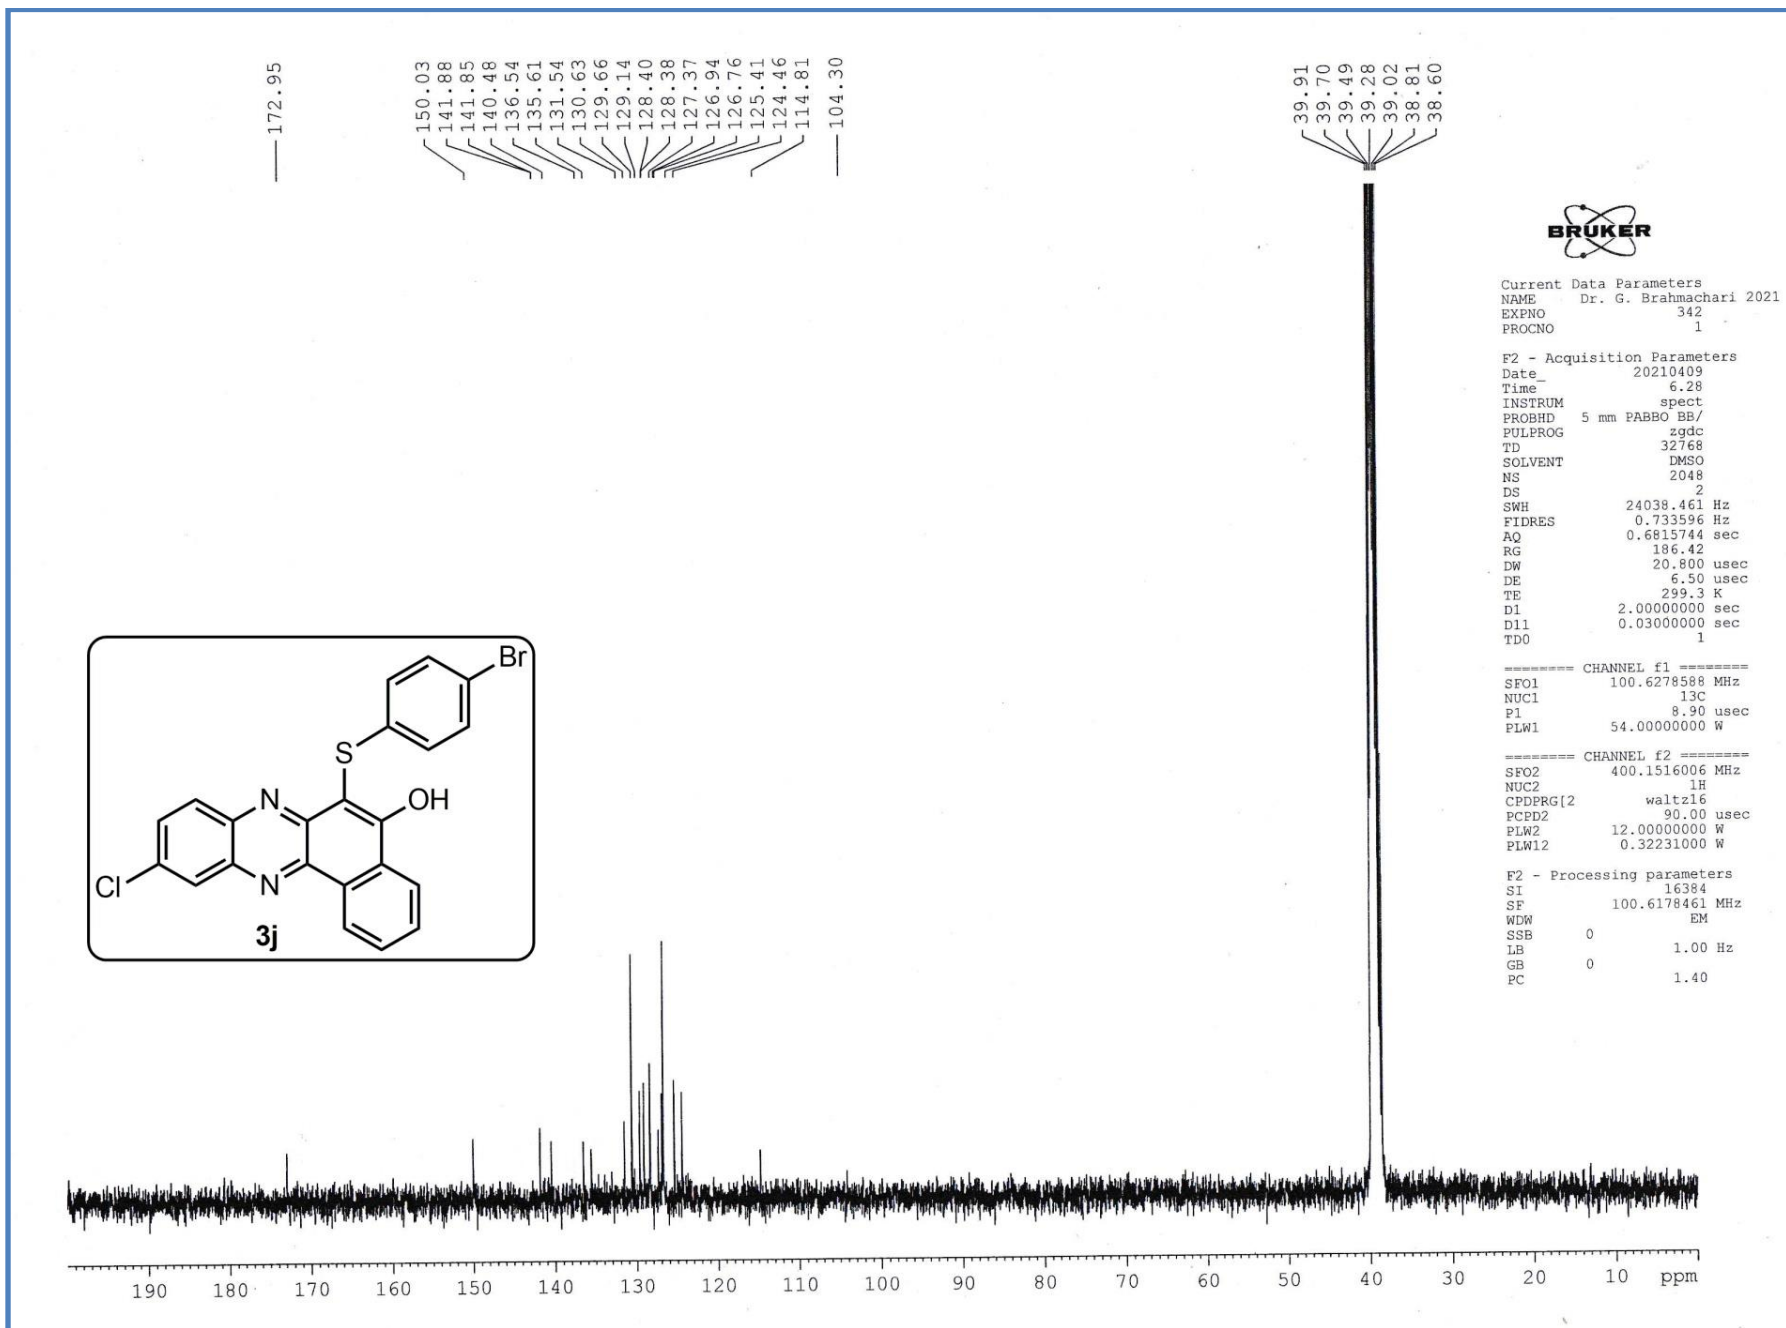

Figure S47. <sup>13</sup>C-NMR spectrum of 6-((4-bromophenyl)thio)-10-chlorobenzo[*a*]phenazin-5-ol (**3j**)

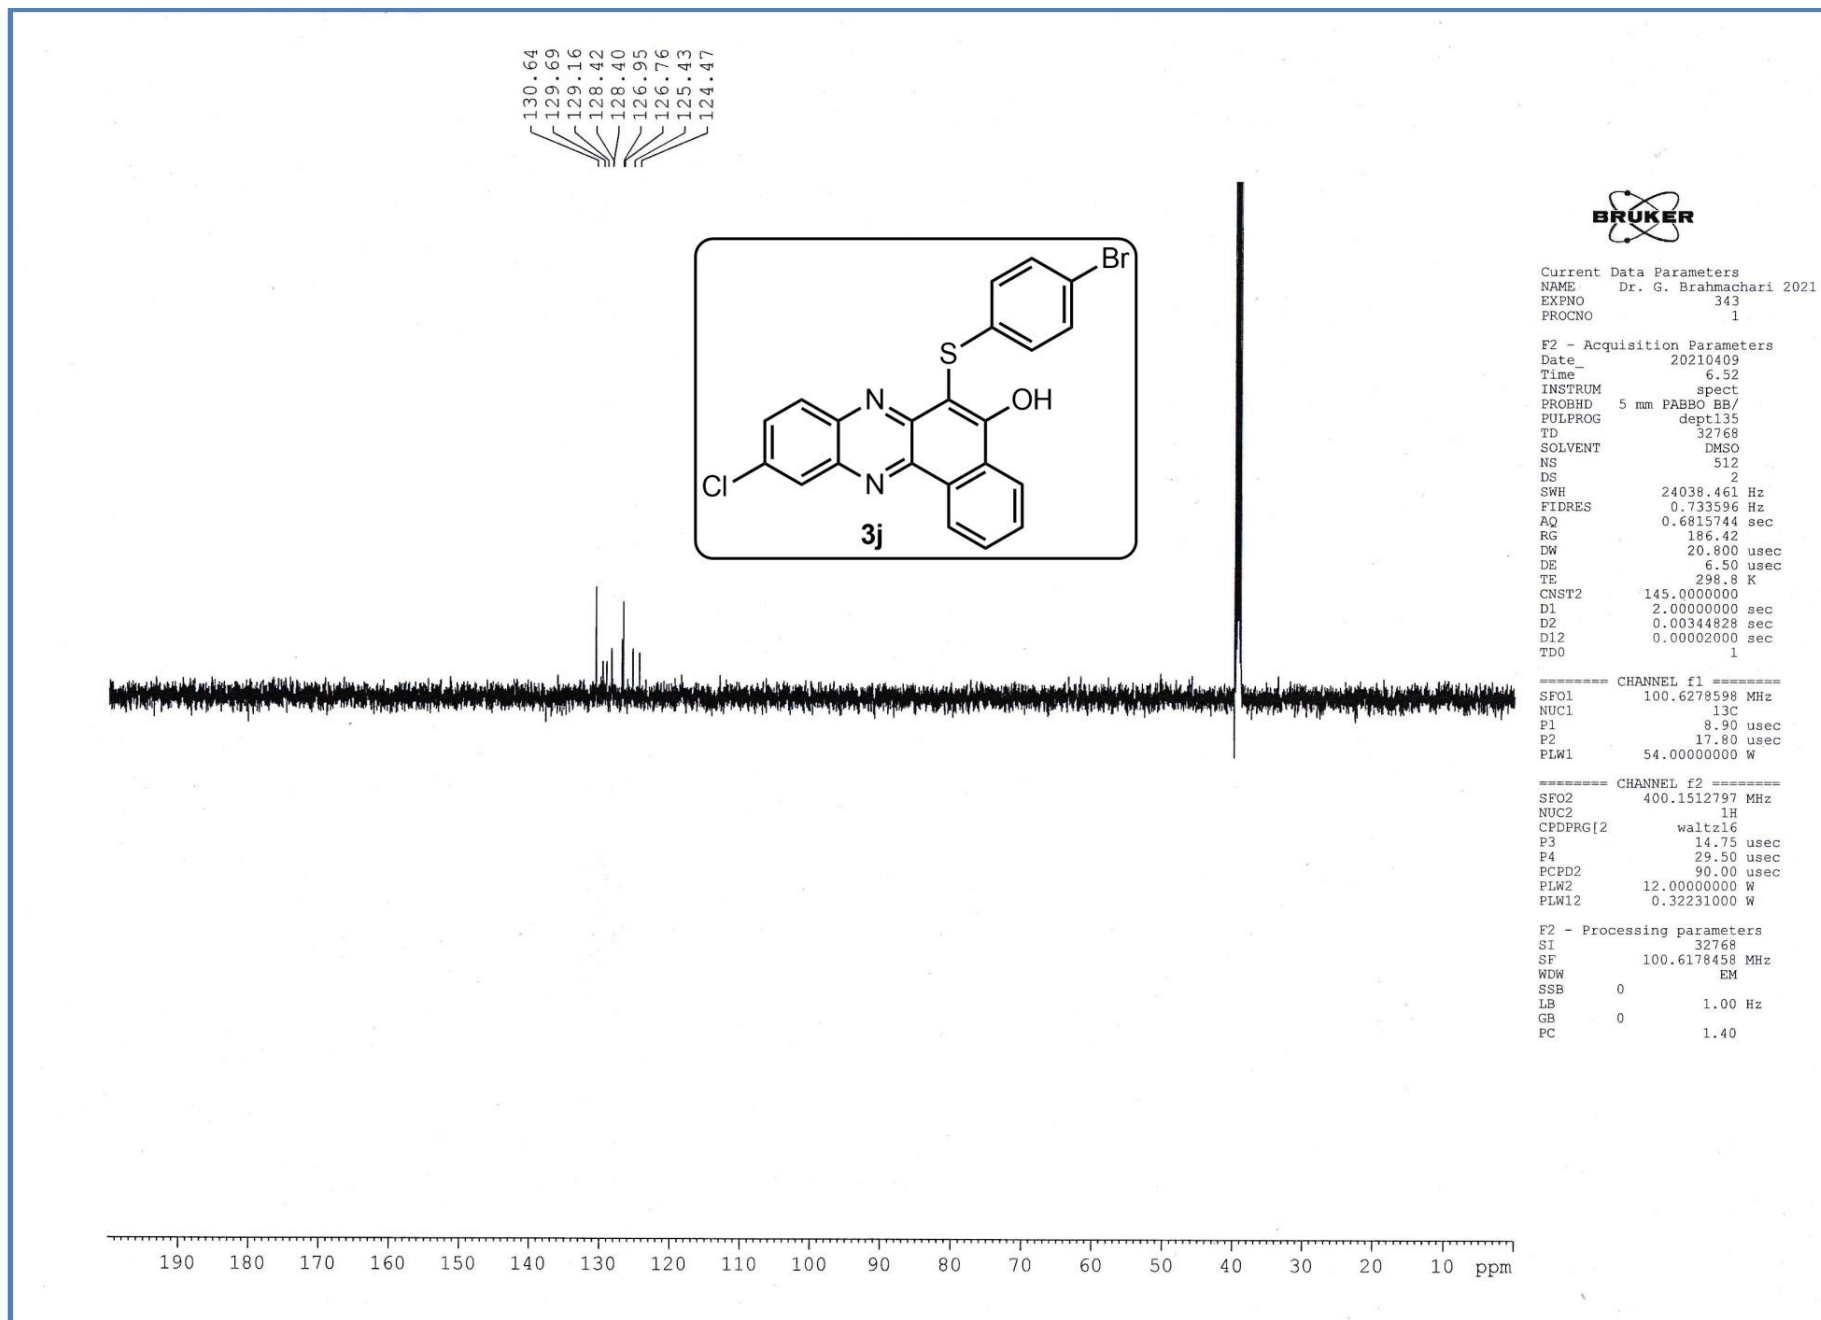

Figure S48. DEPT-135 NMR spectrum of 6-((4-bromophenyl)thio)-10-chlorobenzo[a]phenazin-5-ol (**3j**)

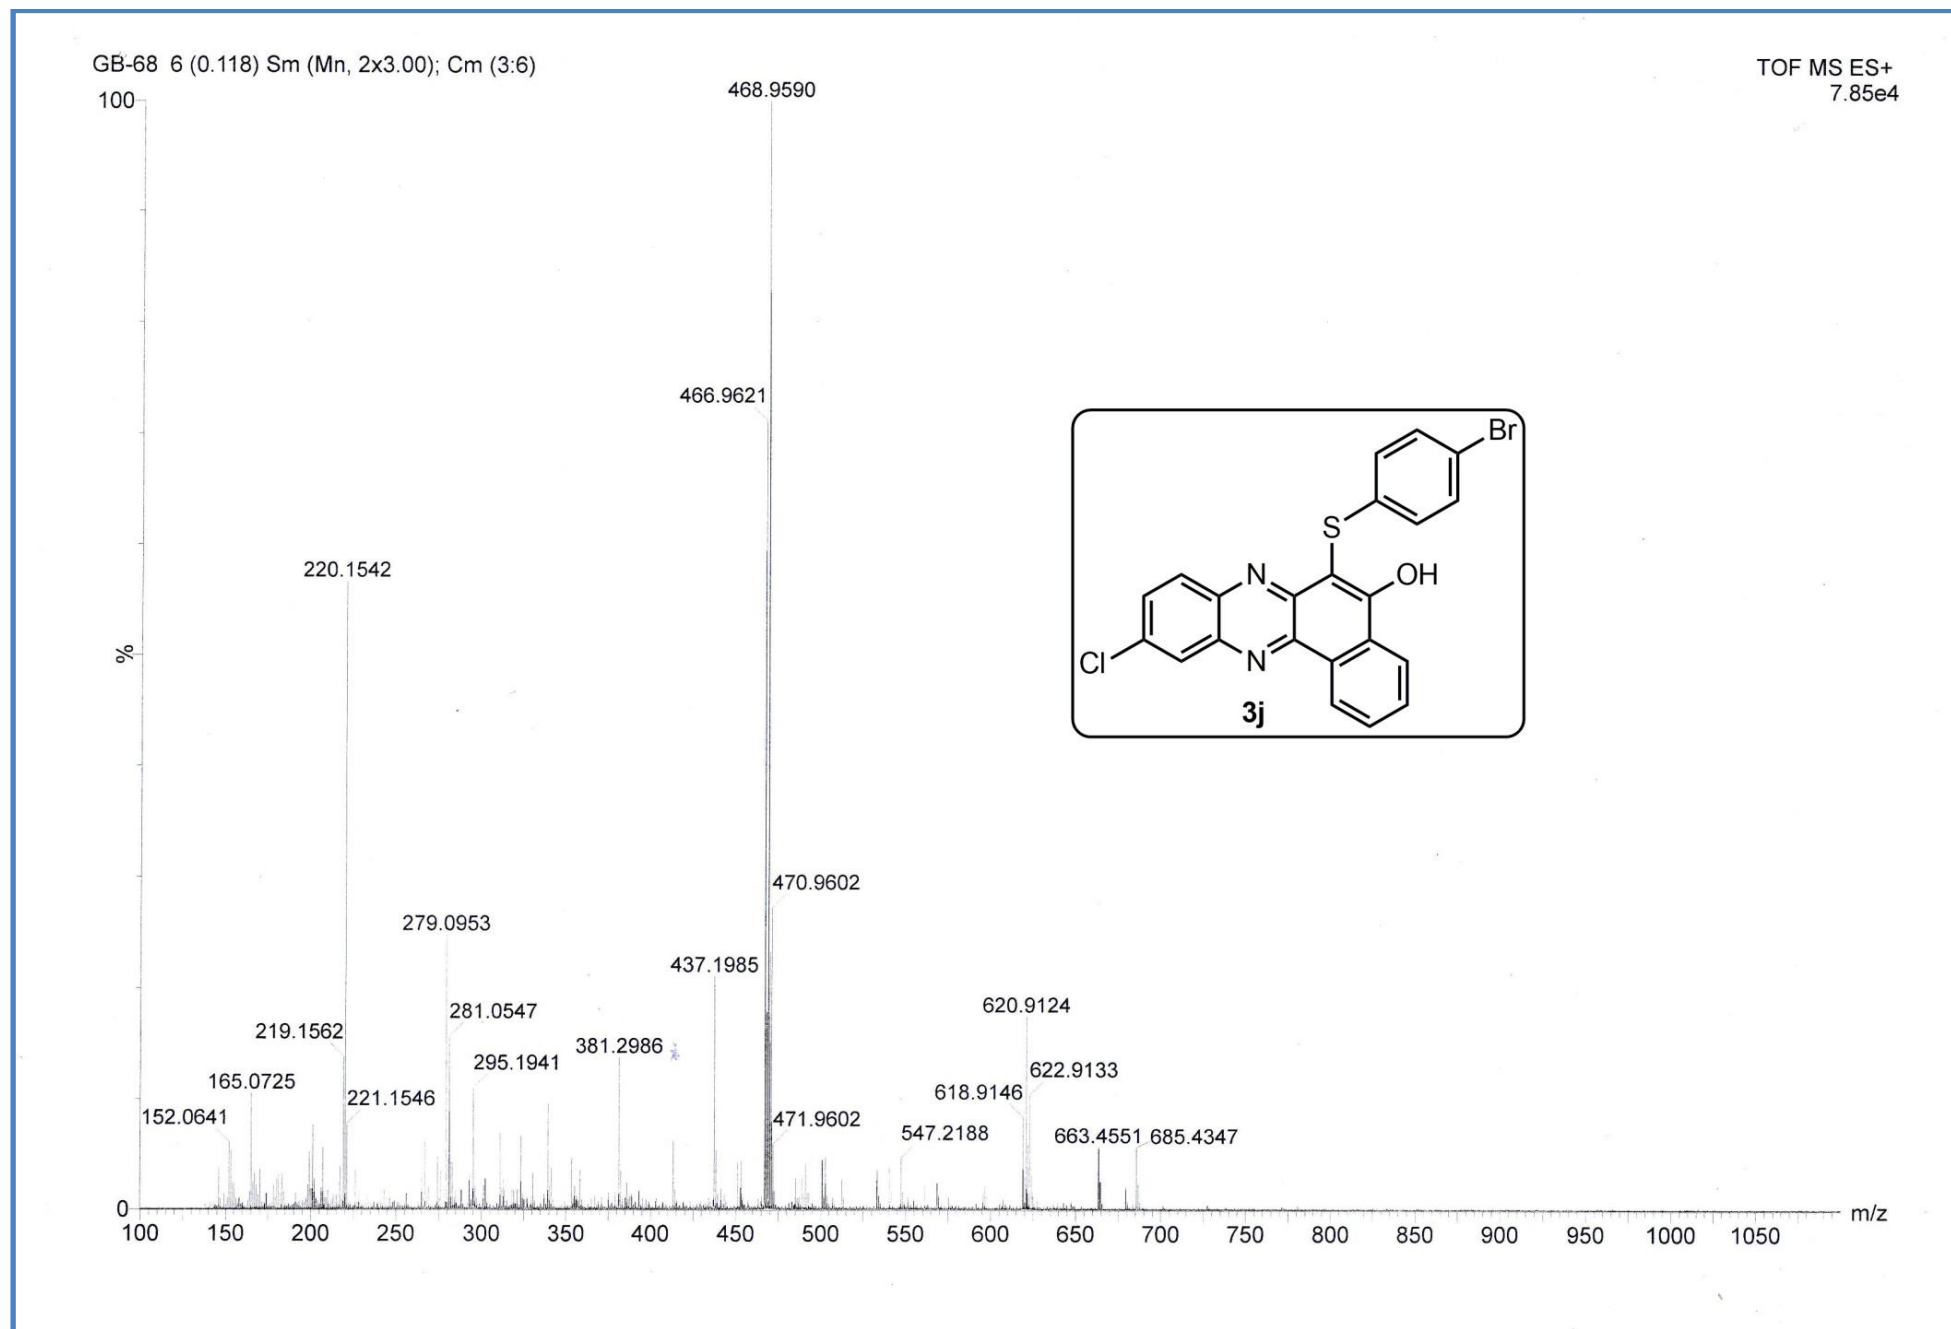

Figure S49. High-resolution Mass spectra of 6-((4-bromophenyl)thio)-10-chlorobenzo[*a*]phenazin-5-ol (**3j**)



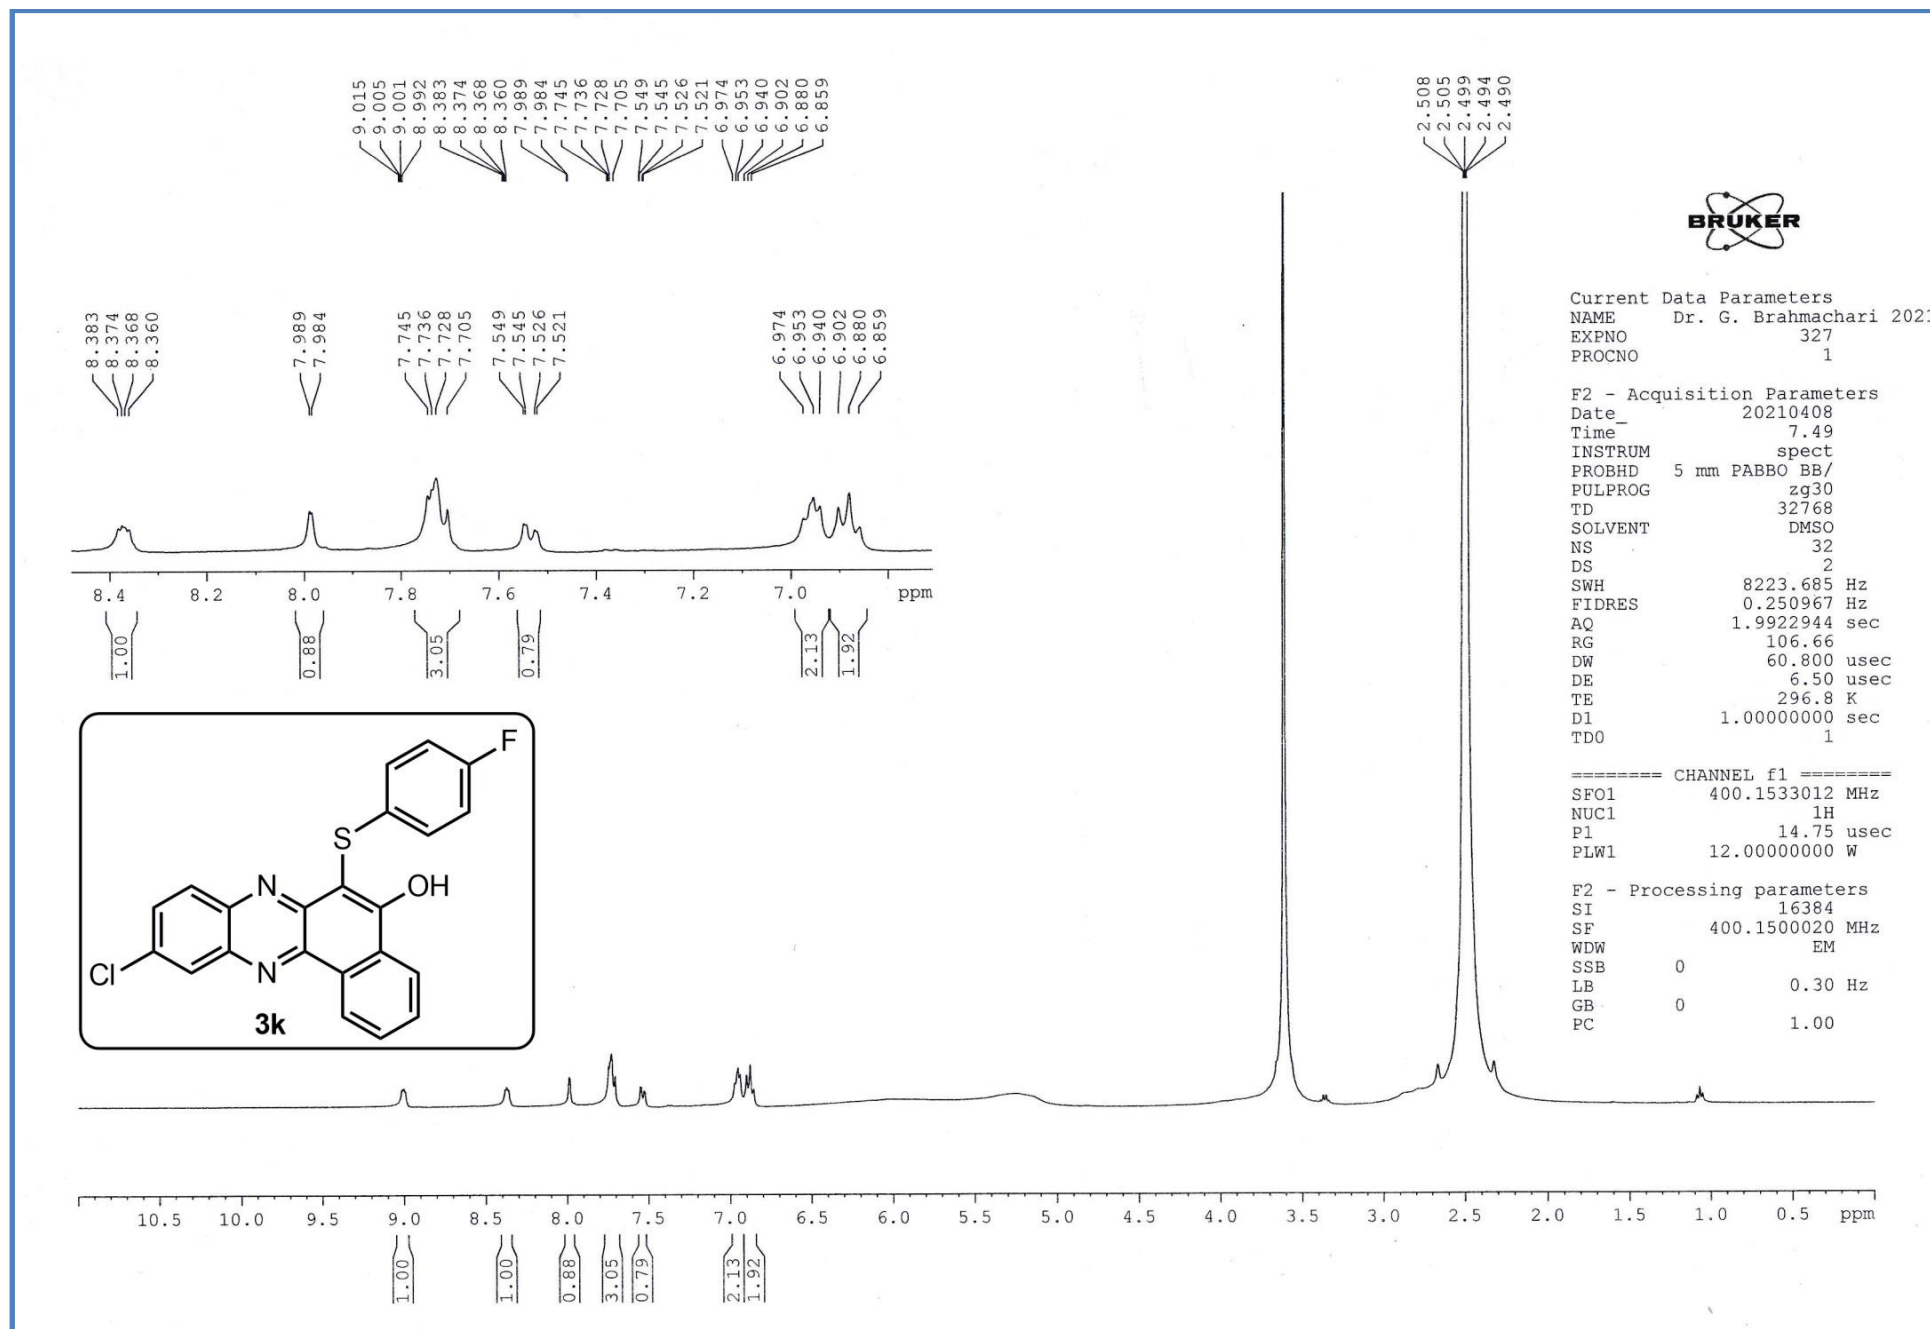

Figure S50. <sup>1</sup>H-NMR spectrum of 10-chloro-6-((4-fluorophenyl)thio)benzo[*a*]phenazin-5-ol (**3k**)

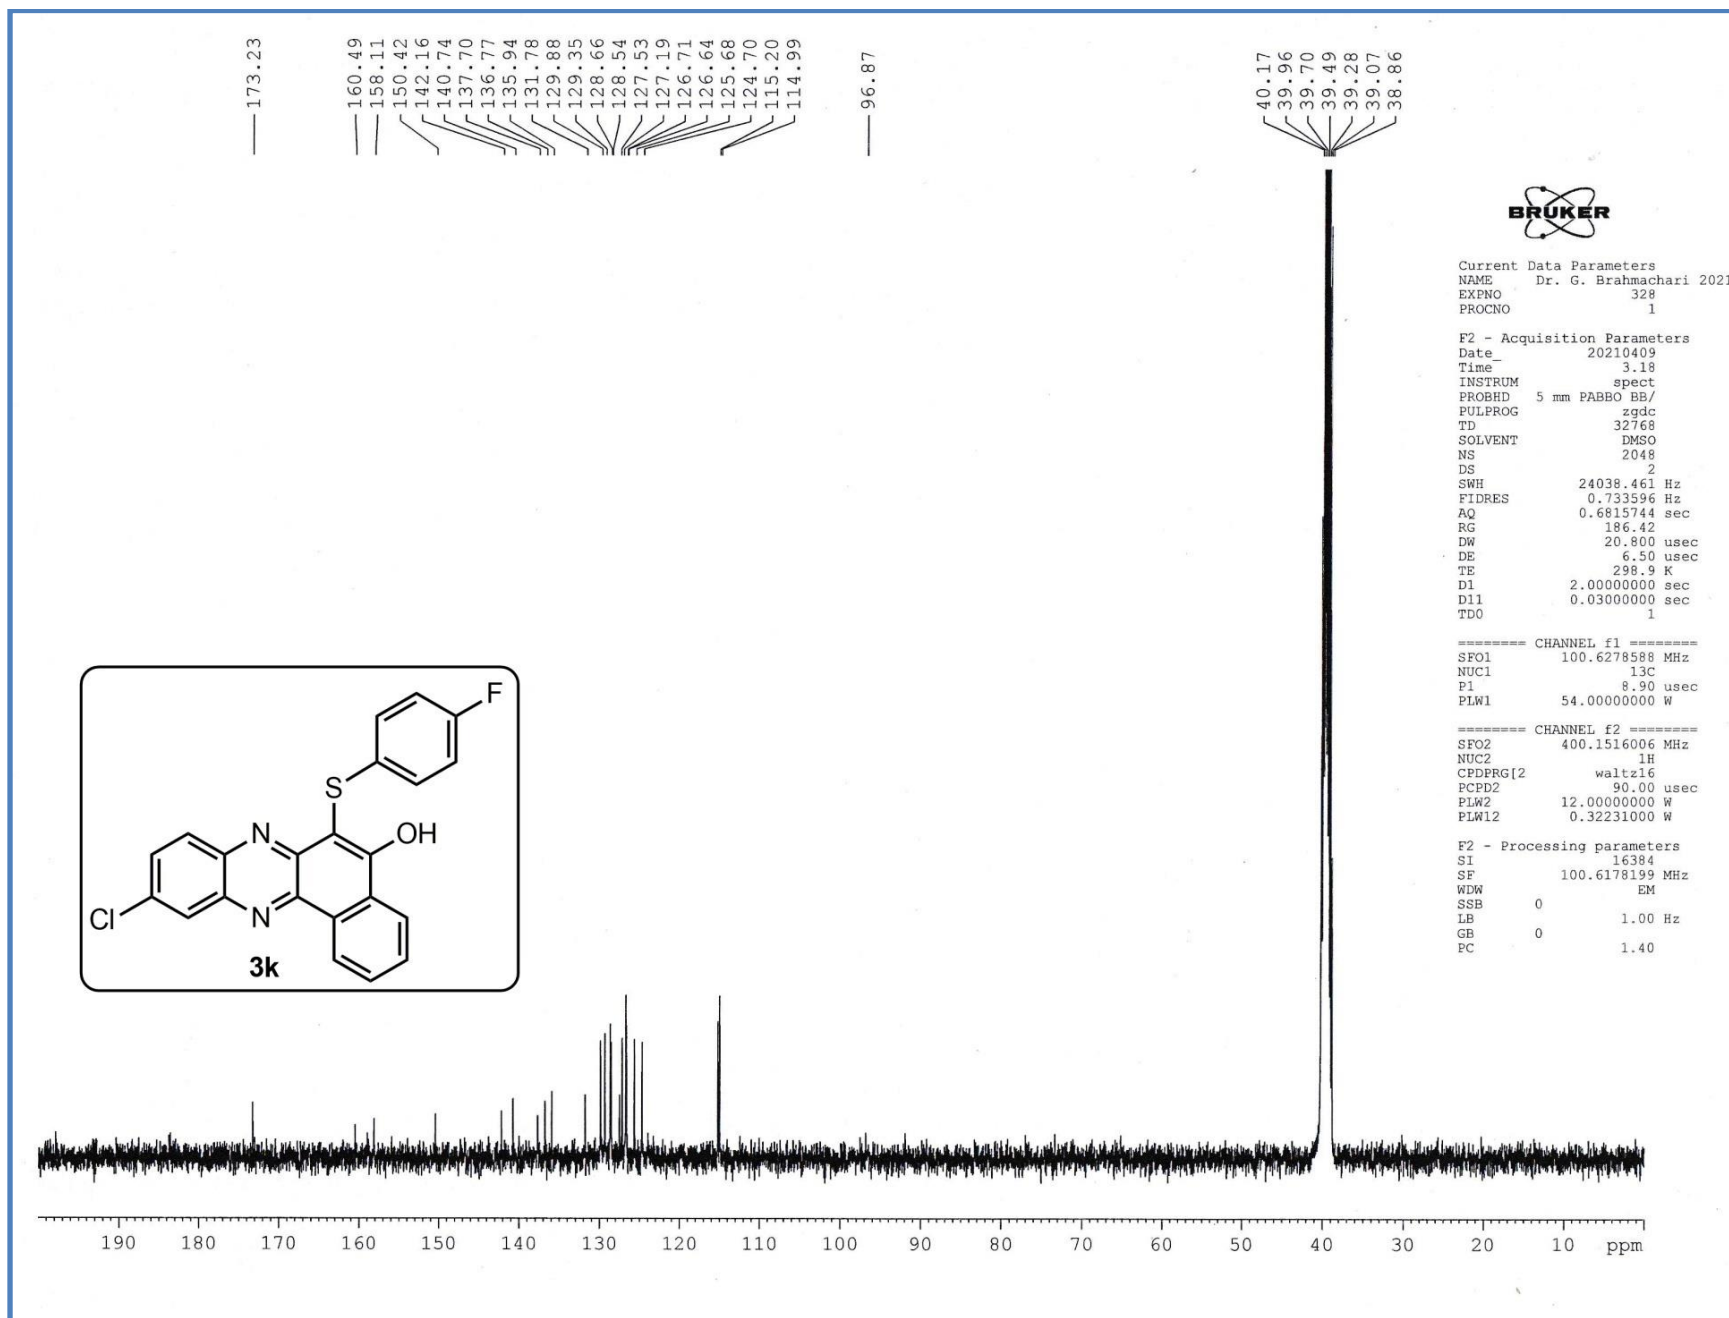

Figure S51. <sup>13</sup>C-NMR spectrum of 10-chloro-6-((4-fluorophenyl)thio)benzo[*a*]phenazin-5-ol (**3k**)

GB-69 7 (0.135) Sm (Mn, 2x3.00); Cm (3:7)

TOF MS ES+  
2.05e5

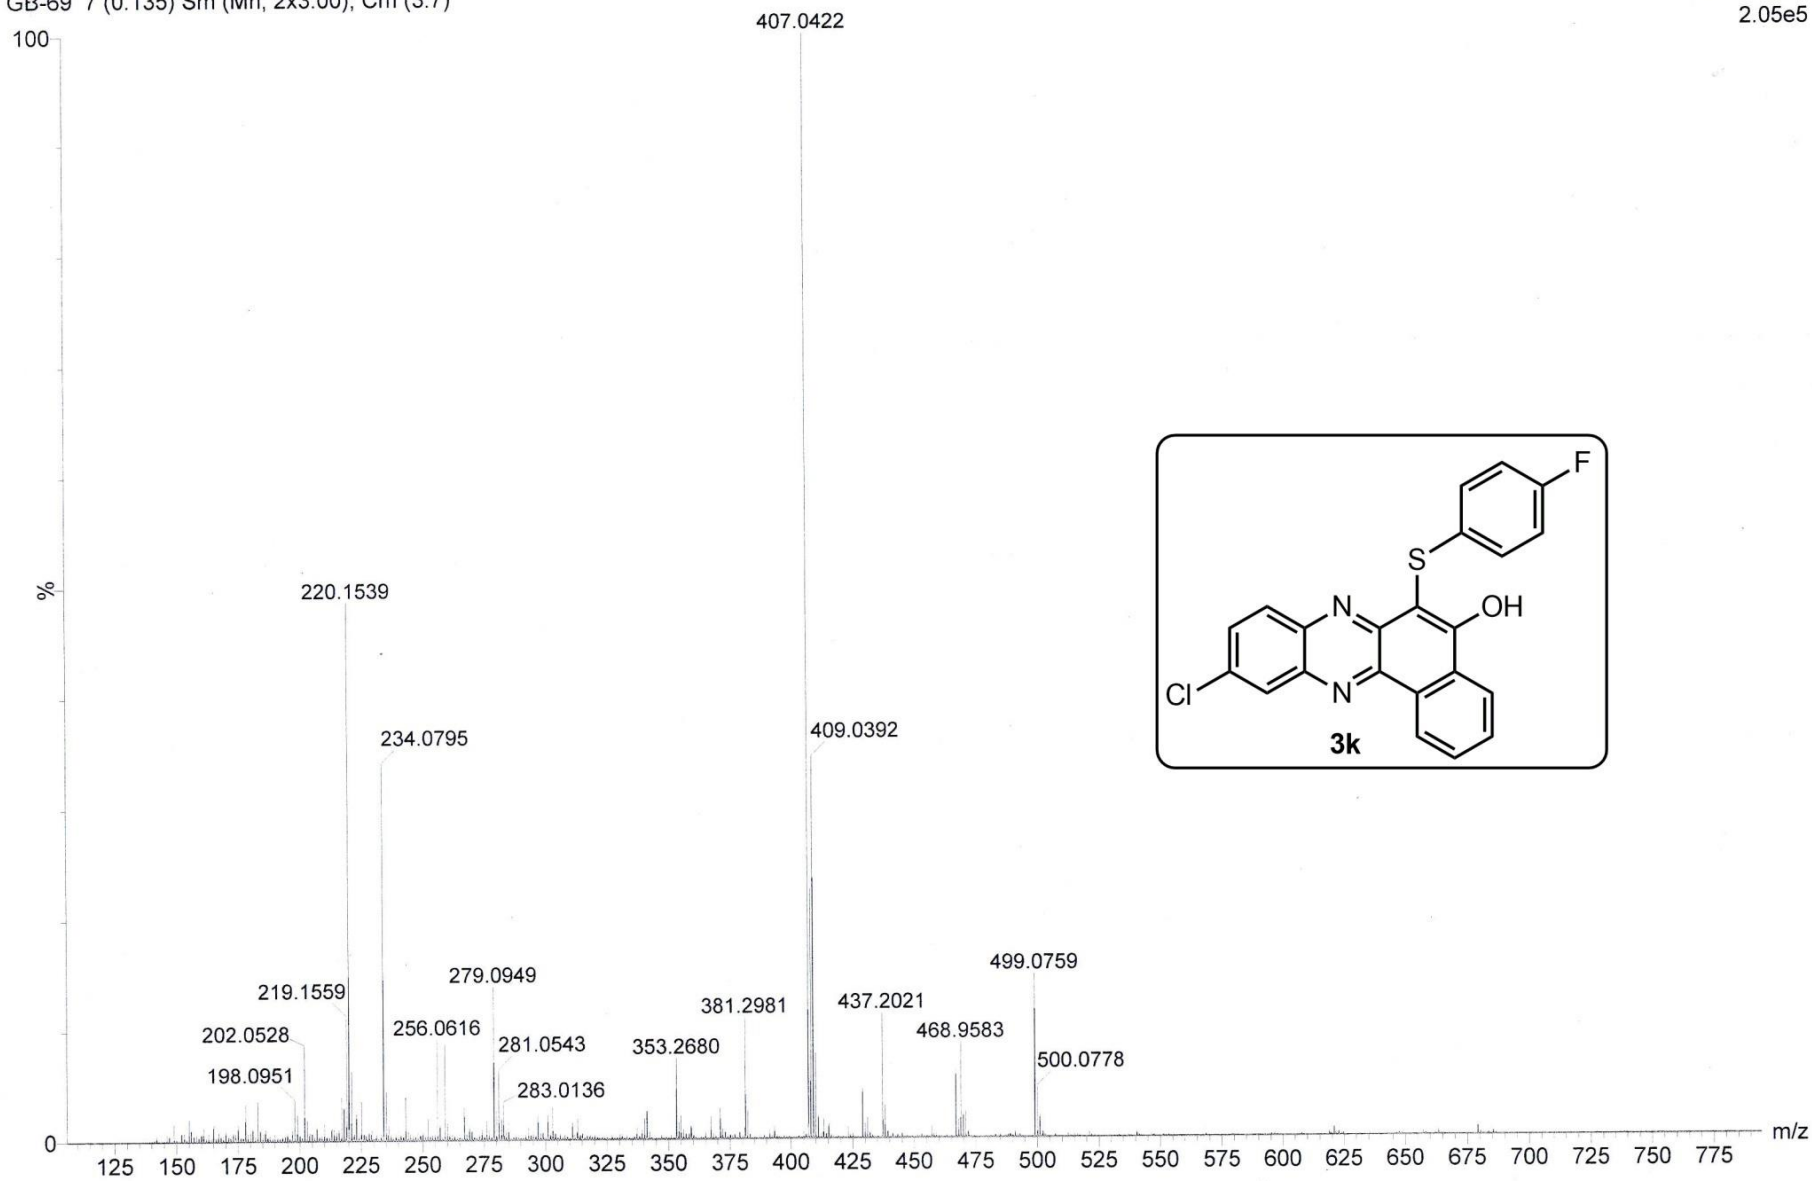

Figure S52. High-resolution Mass spectra of 10-chloro-6-((4-fluorophenyl)thio)benzo[a]phenazin-5-ol (**3k**)

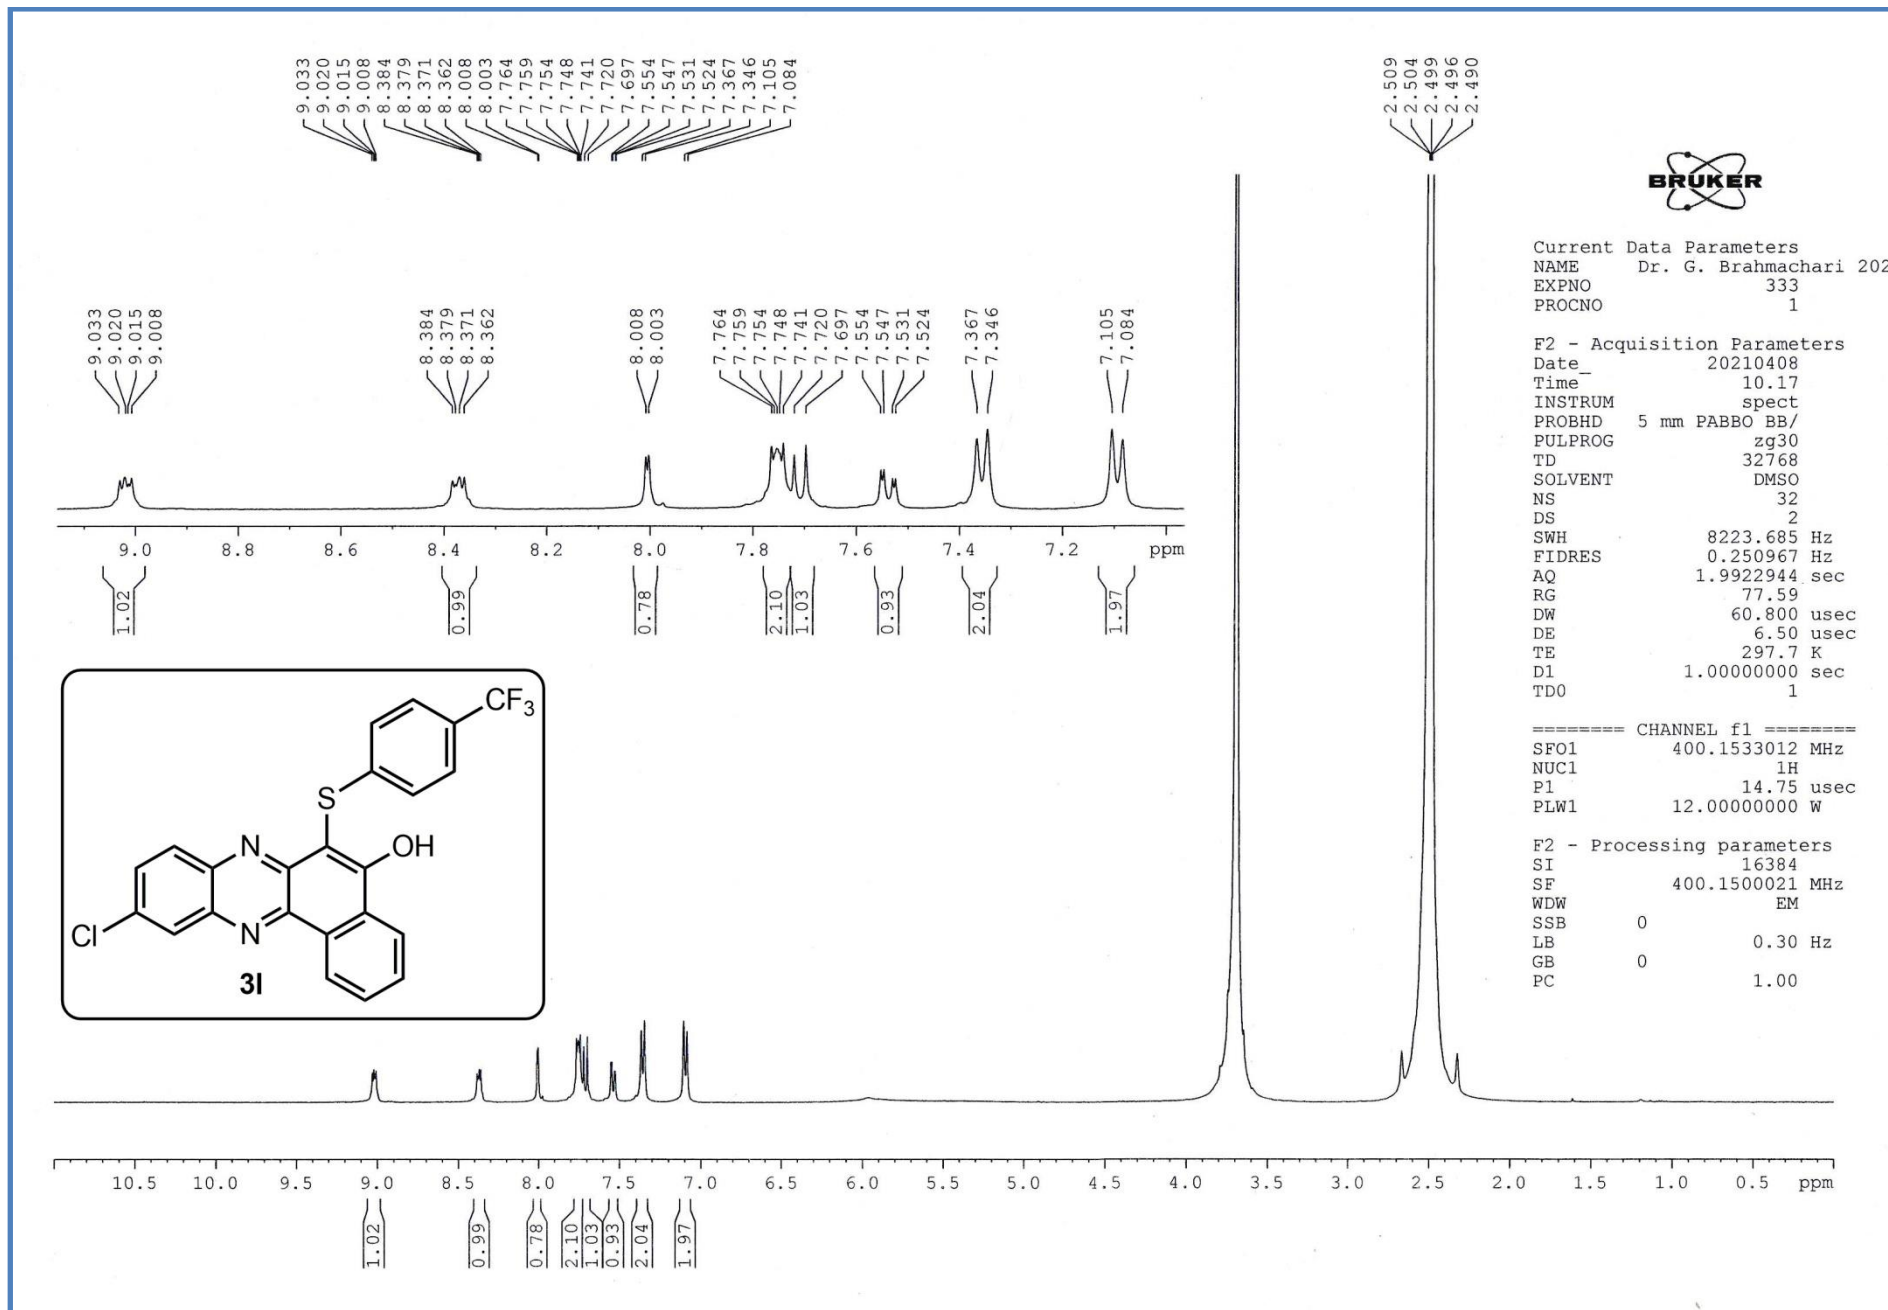

Figure S53. <sup>1</sup>H-NMR spectrum of 10-chloro-6-((4-(trifluoromethyl)phenyl)thio)benzo[*a*]phenazin-5-ol (**3I**)

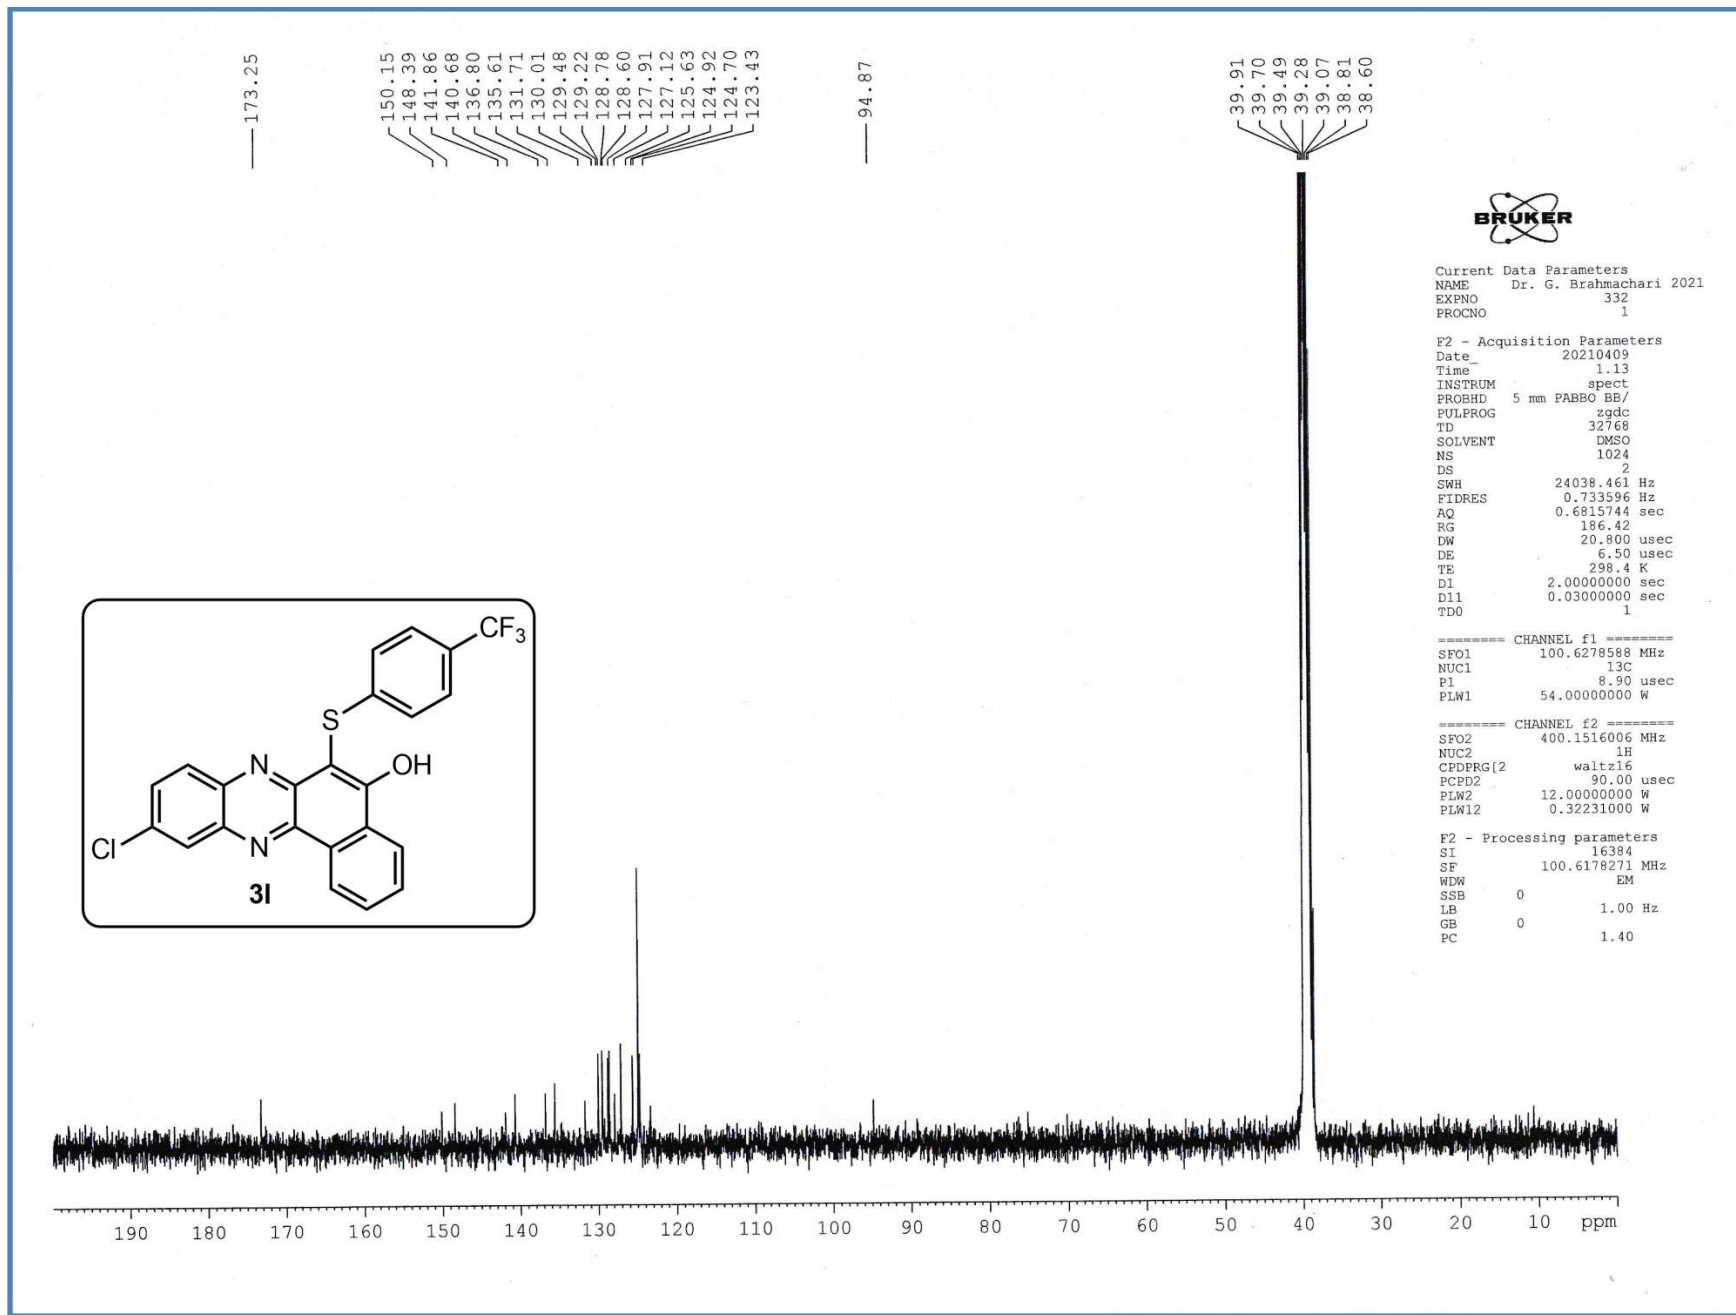

Figure S54. <sup>13</sup>C-NMR spectrum of 10-chloro-6-((4-(trifluoromethyl)phenyl)thio)benzo[*a*]phenazin-5-ol (**3I**)

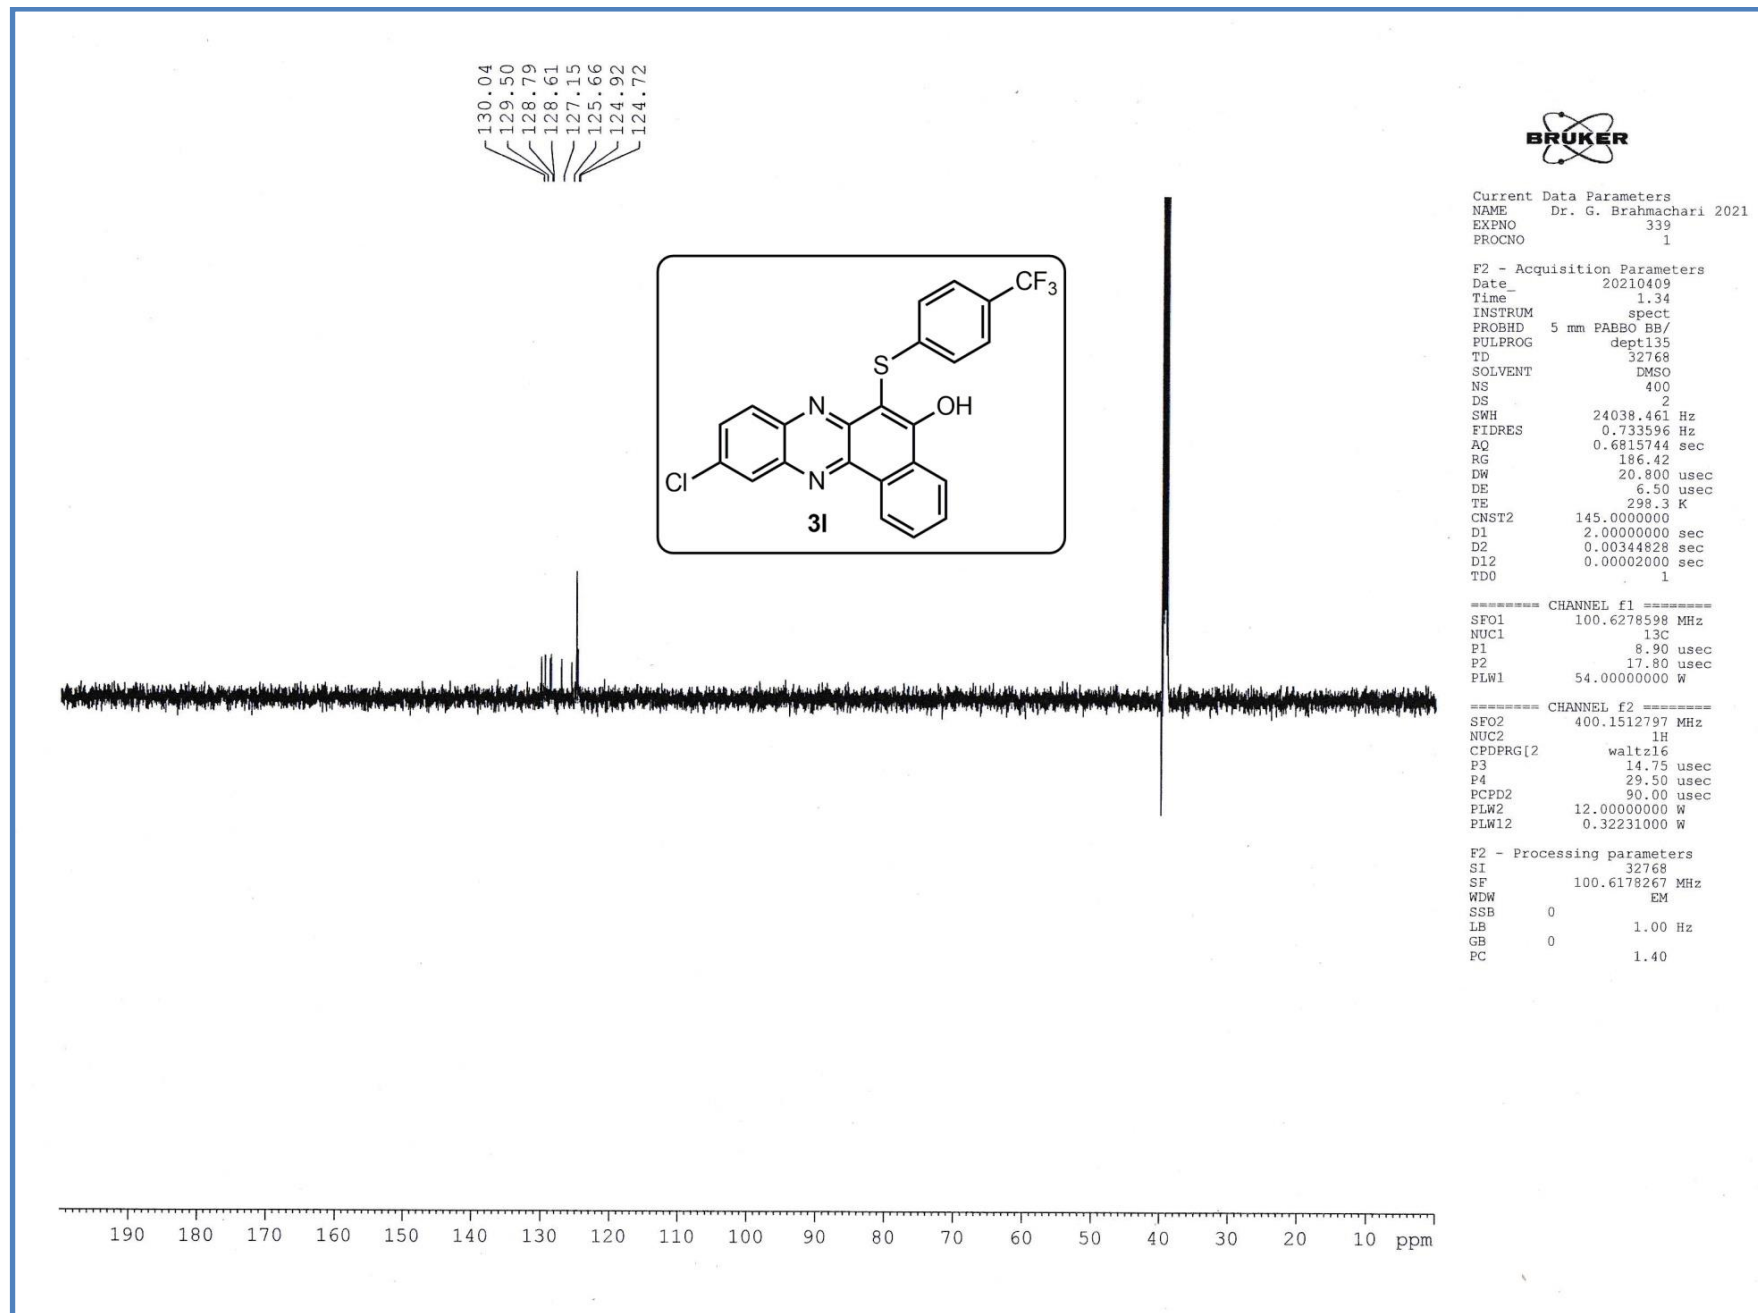

Figure S55. DEPT-135 NMR spectrum of 10-chloro-6-((4-(trifluoromethyl)phenyl)thio)benzo[*a*]phenazin-5-ol (**31**)

GB-70 5 (0.101) Sm (Mn, 2x3.00); Cm (2:5)

TOF MS ES+  
1.90e5

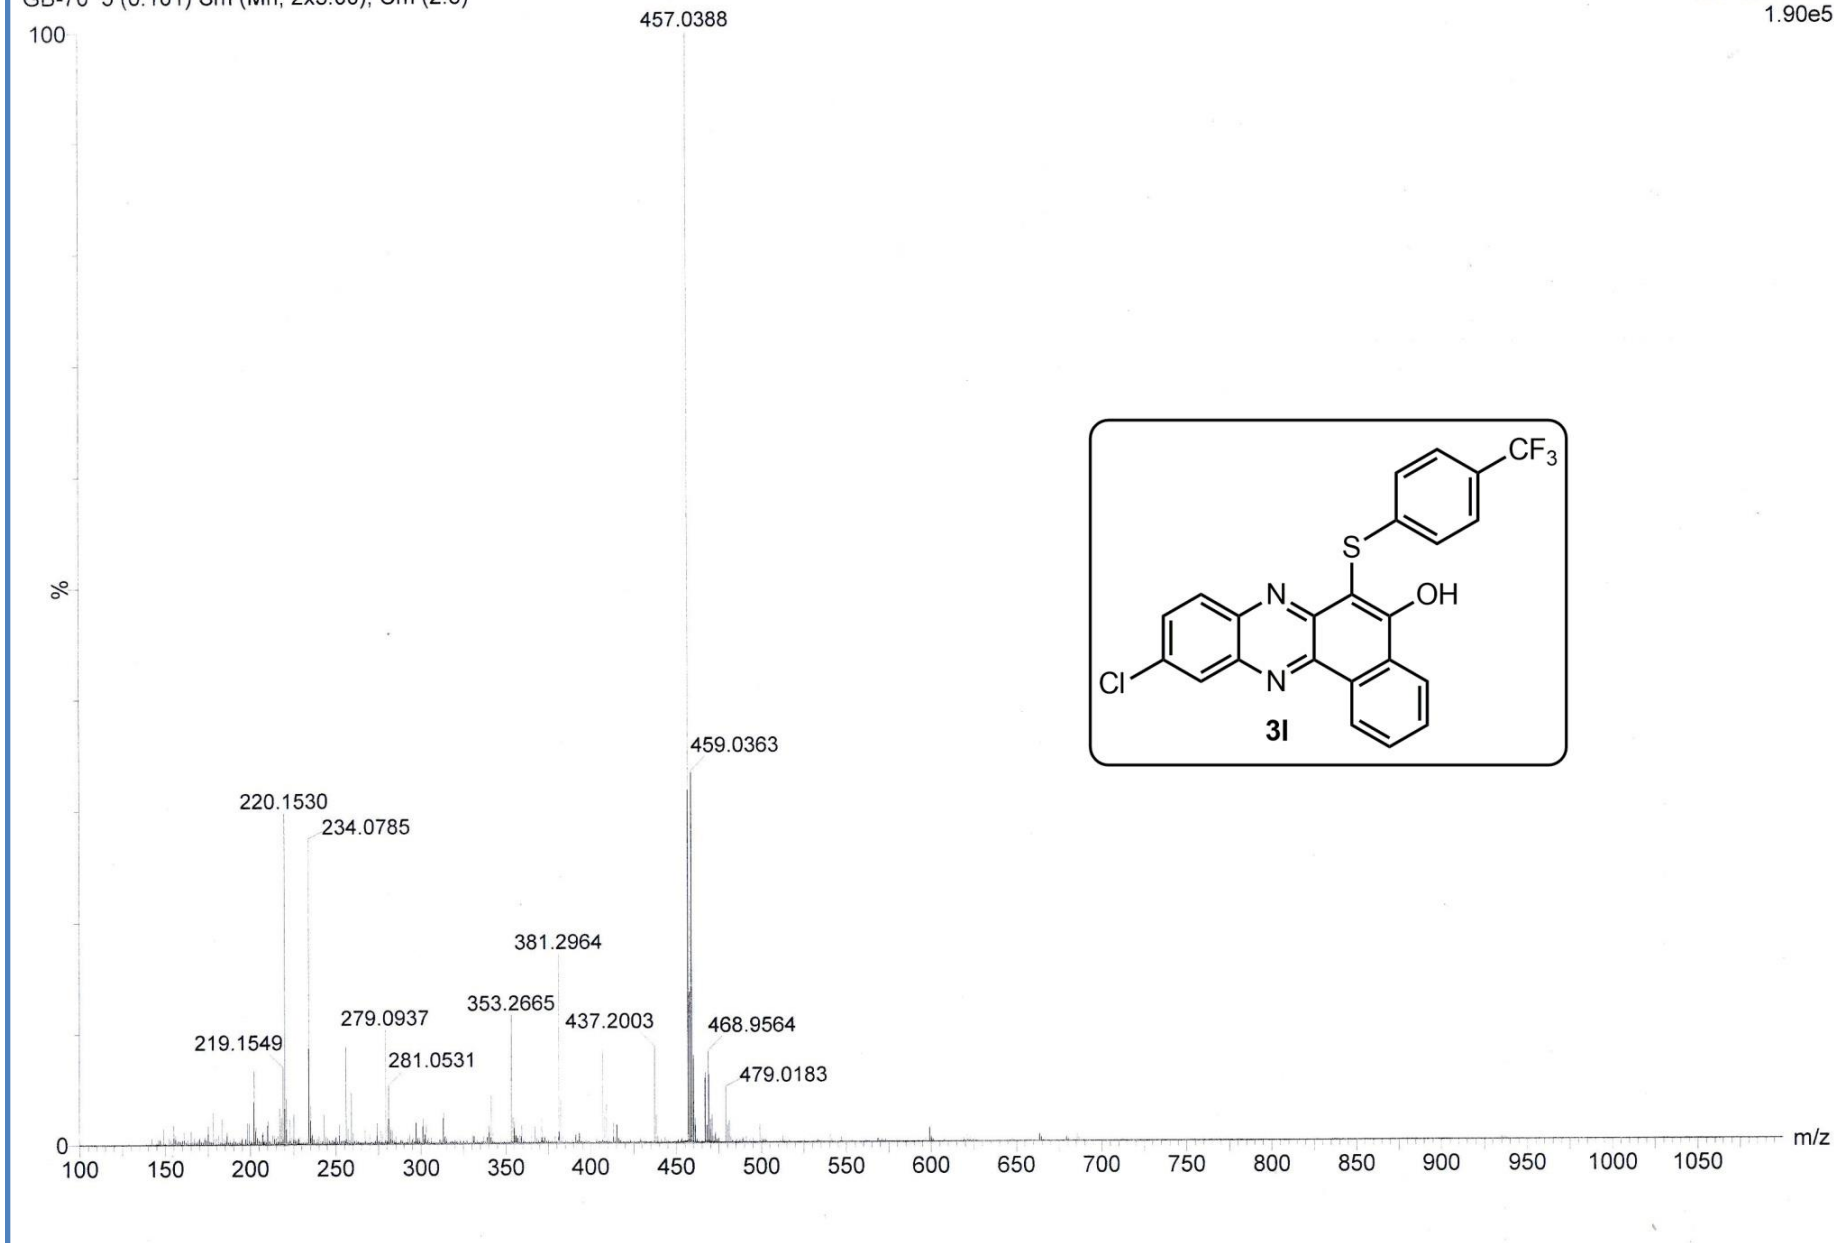

Figure S56. High-resolution Mass spectra of 10-chloro-6-((4-(trifluoromethyl)phenyl)thio)benzo[*a*]phenazin-5-ol (**3I**)

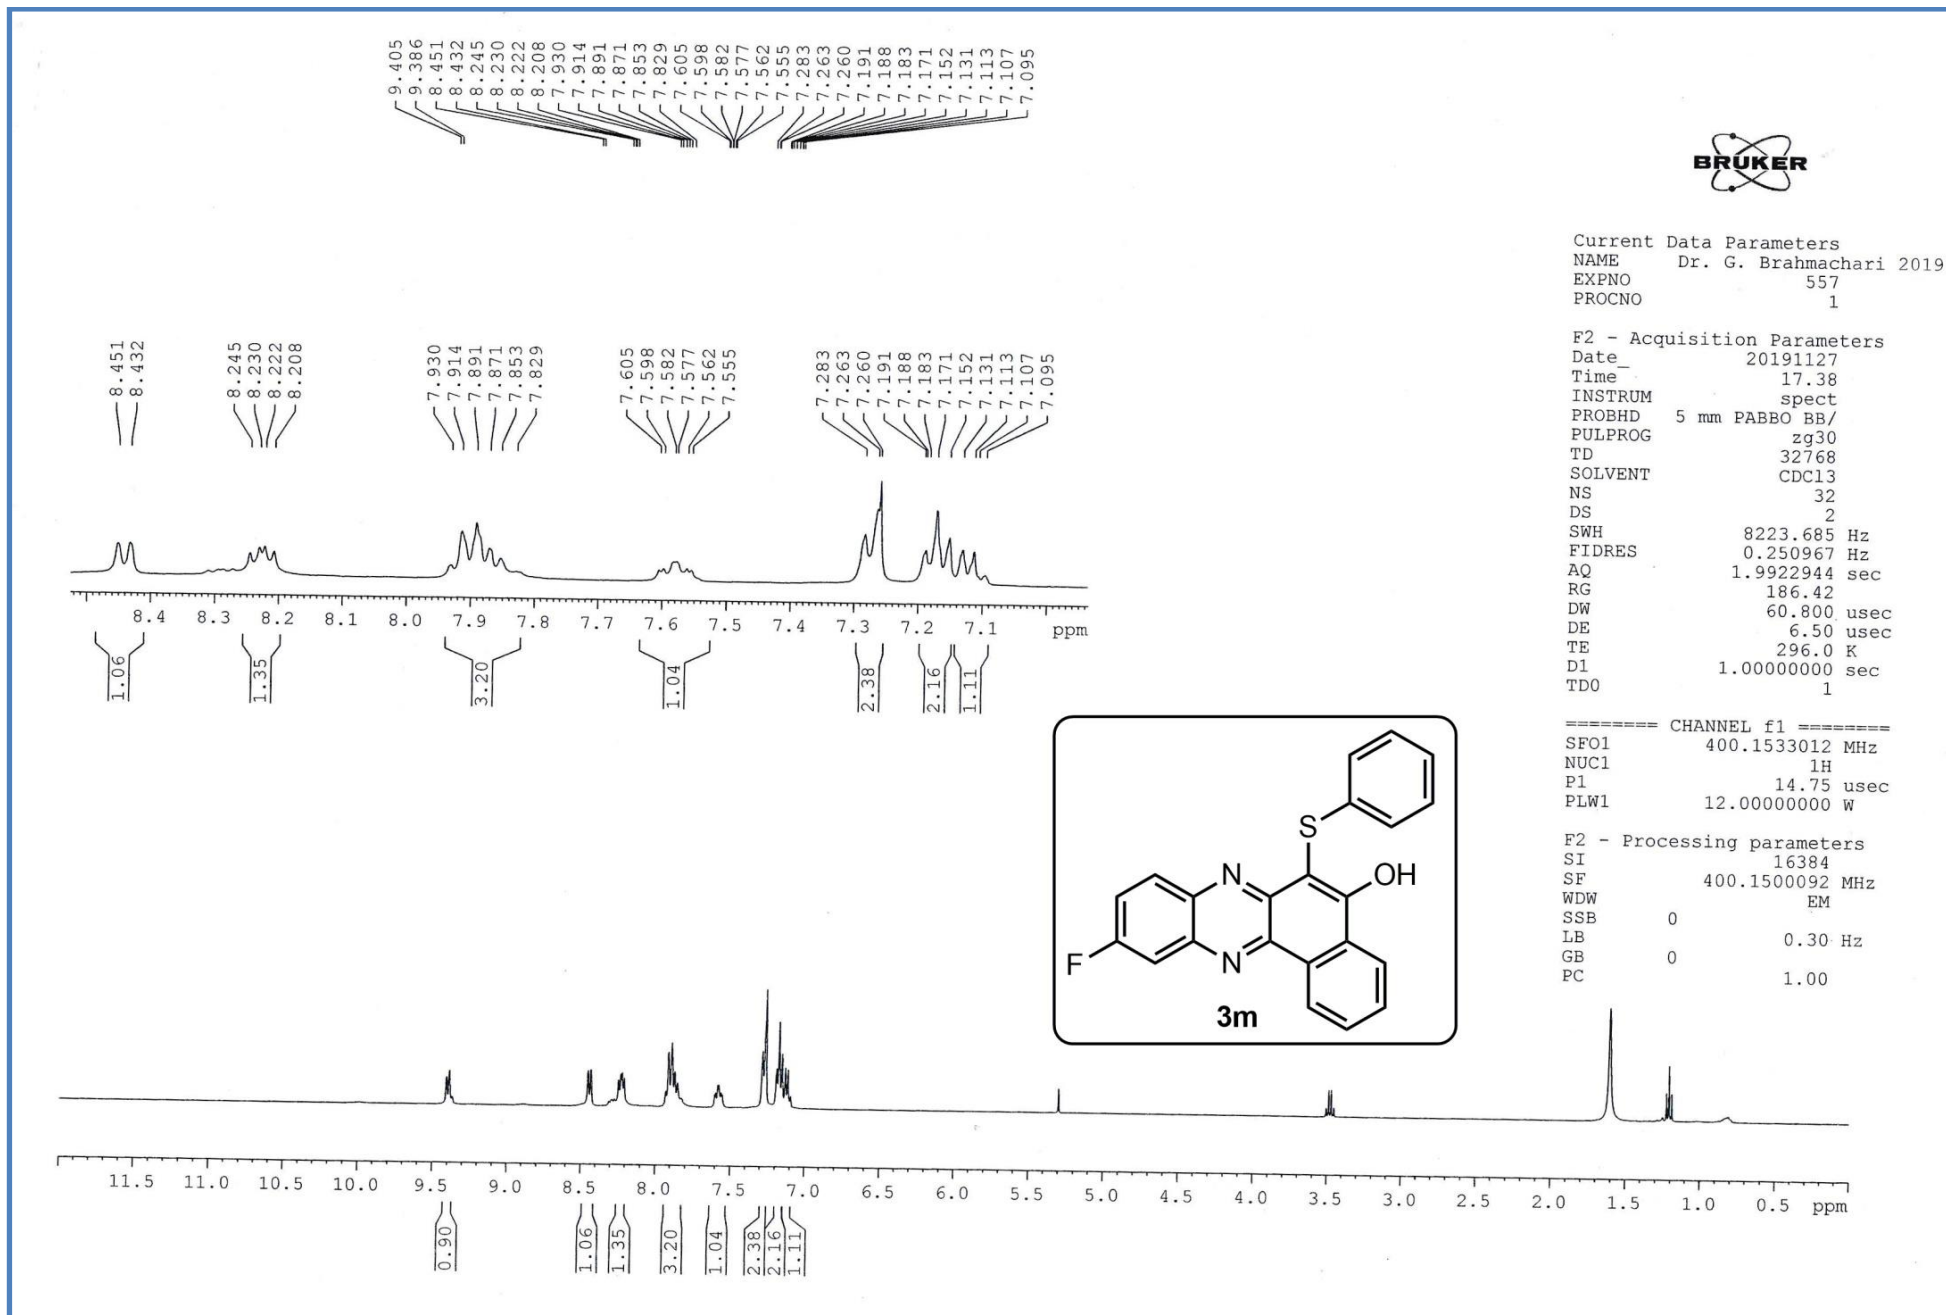

Figure S57. <sup>1</sup>H-NMR spectrum of 10-fluoro-6-(phenylthio)benzo[*a*]phenazin-5-ol (**3m**)



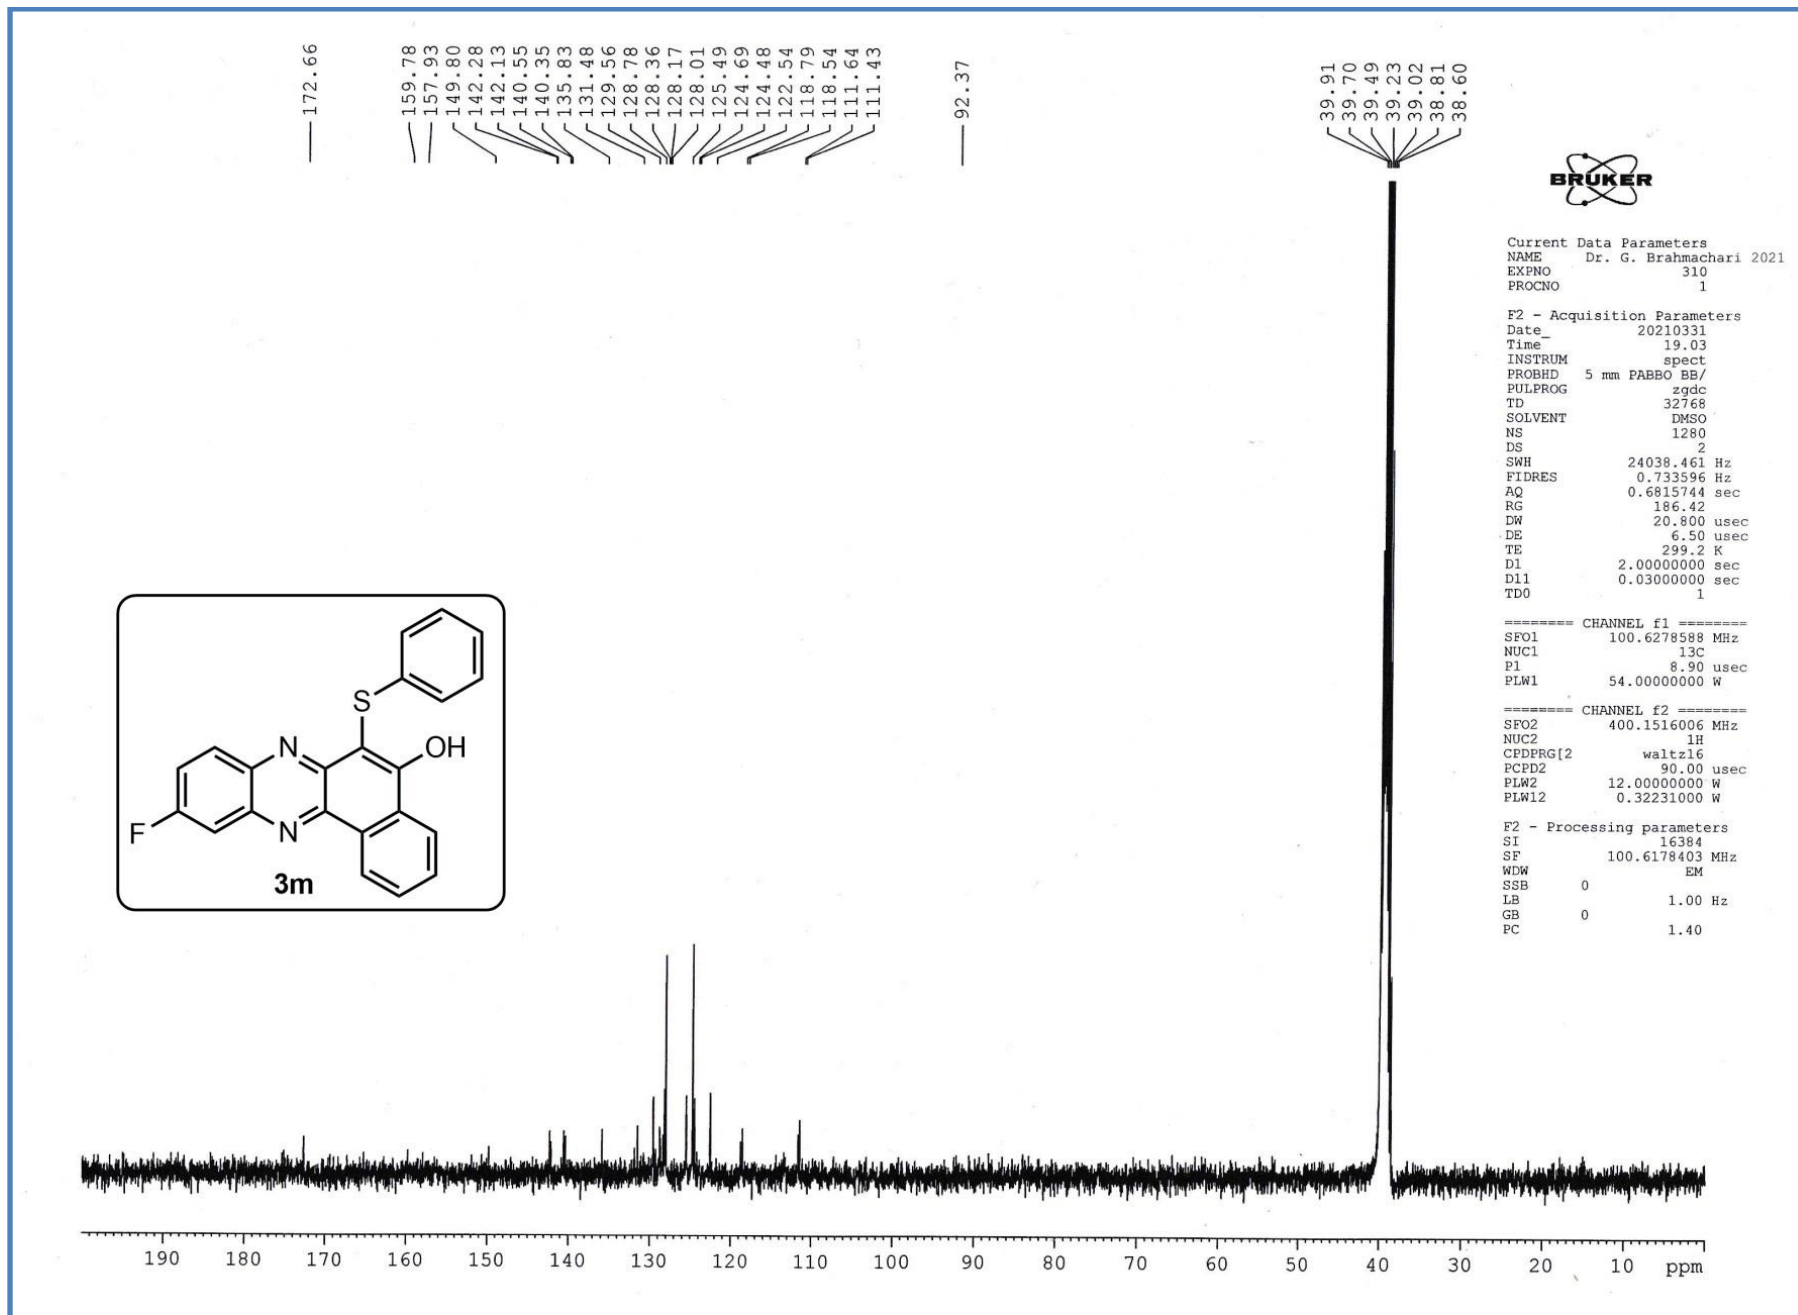

Figure S58. <sup>13</sup>C-NMR spectrum of 10-fluoro-6-(phenylthio)benzo[*a*]phenazin-5-ol (**3m**)

## Display Report

### Analysis Info

Analysis Name D:\Data\User\_data\2020\JAN\GB-59REP.d  
Method Tune\_pos\_Mid.m  
Sample Name GB-59  
Comment methanol fraction

Acquisition Date 1/6/2020 3:16:32 PM

Operator IISER Kalyani  
Instrument maXis impact 8282001.00127

### Acquisition Parameter

|             |          |                      |          |                  |           |
|-------------|----------|----------------------|----------|------------------|-----------|
| Source Type | ESI      | Ion Polarity         | Positive | Set Nebulizer    | 0.4 Bar   |
| Focus       | Active   | Set Capillary        | 3400 V   | Set Dry Heater   | 200 °C    |
| Scan Begin  | 50 m/z   | Set End Plate Offset | -500 V   | Set Dry Gas      | 4.0 l/min |
| Scan End    | 3000 m/z | Set Charging Voltage | 2000 V   | Set Divert Valve | Source    |
|             |          | Set Corona           | 0 nA     | Set APCI Heater  | 0 °C      |

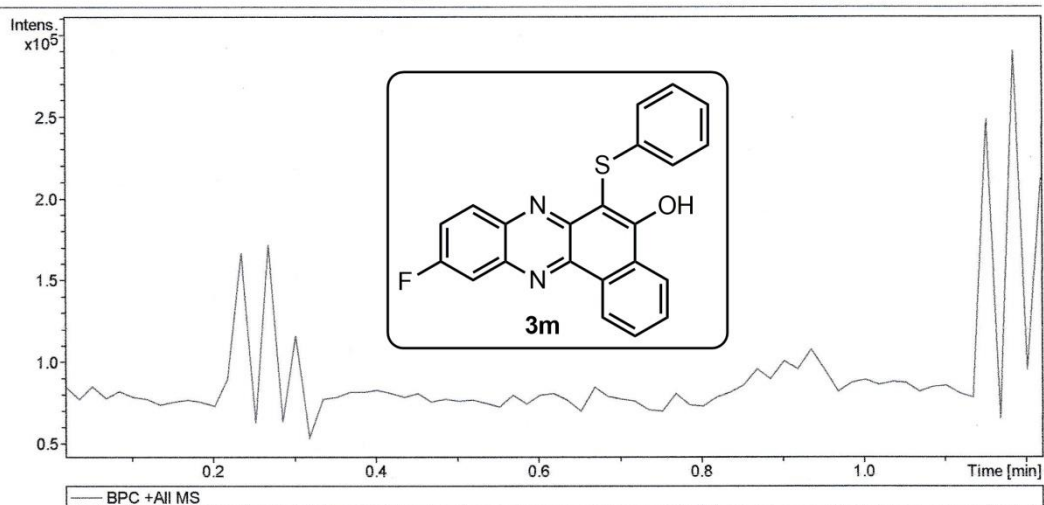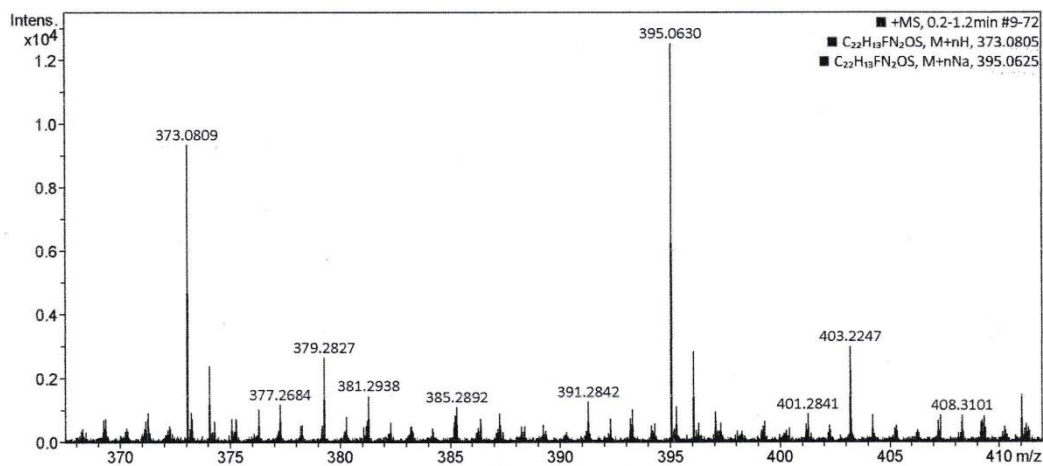

GB-59REP.d

Bruker Compass DataAnalysis 4.1

printed: 1/6/2020 3:21:50 PM

by: IISER Kalyani

Page 1 of 1

Figure S59. High-resolution Mass spectra of 10-fluoro-6-(phenylthio)benzo[a]phenazin-5-ol (**3m**)

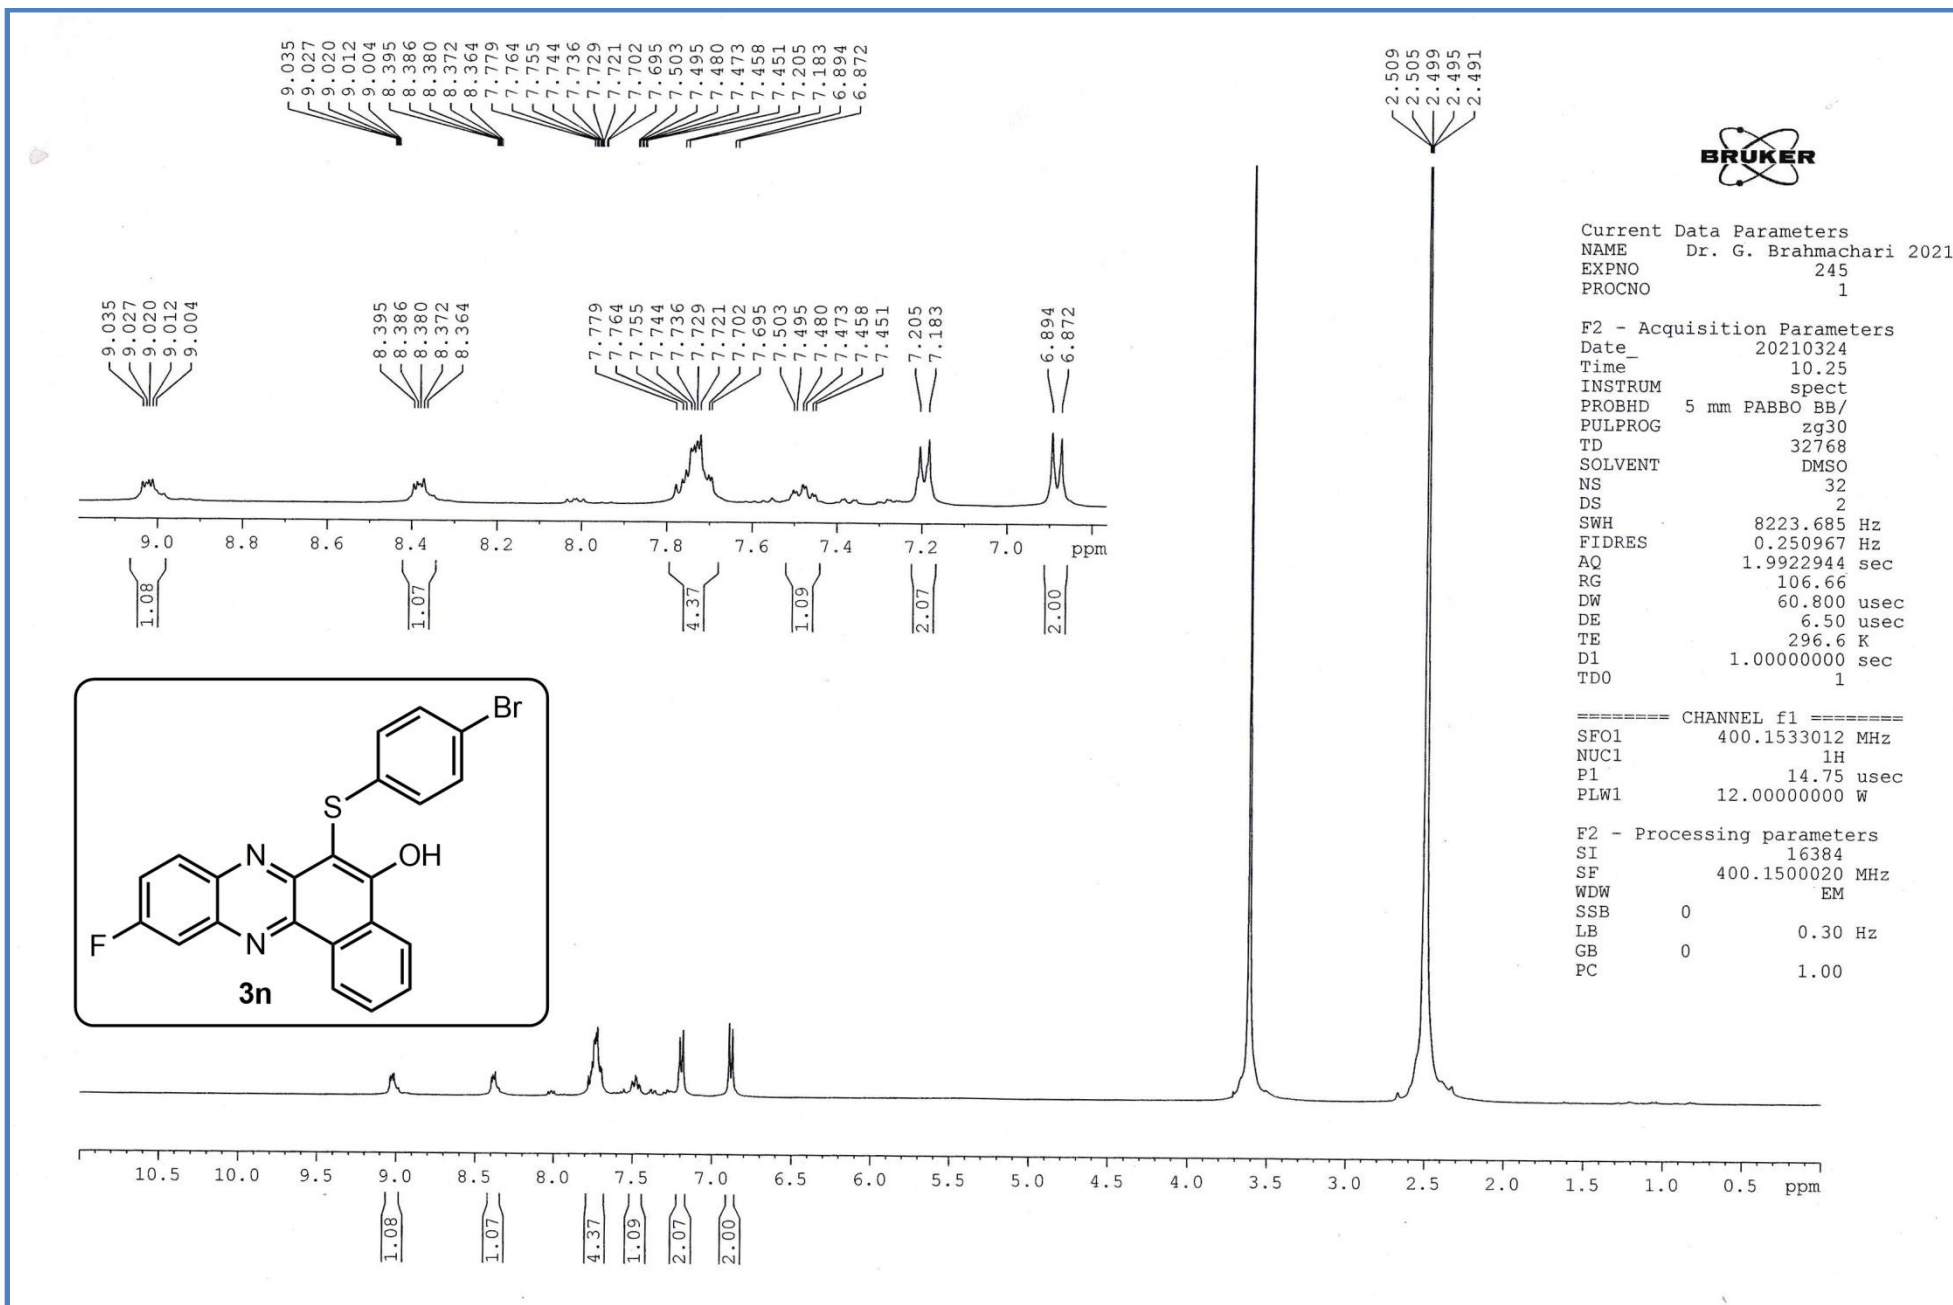

Figure S60. <sup>1</sup>H-NMR spectrum of 6-((4-bromophenyl)thio)-10-fluorobenzo[a]phenazin-5-ol (**3n**)

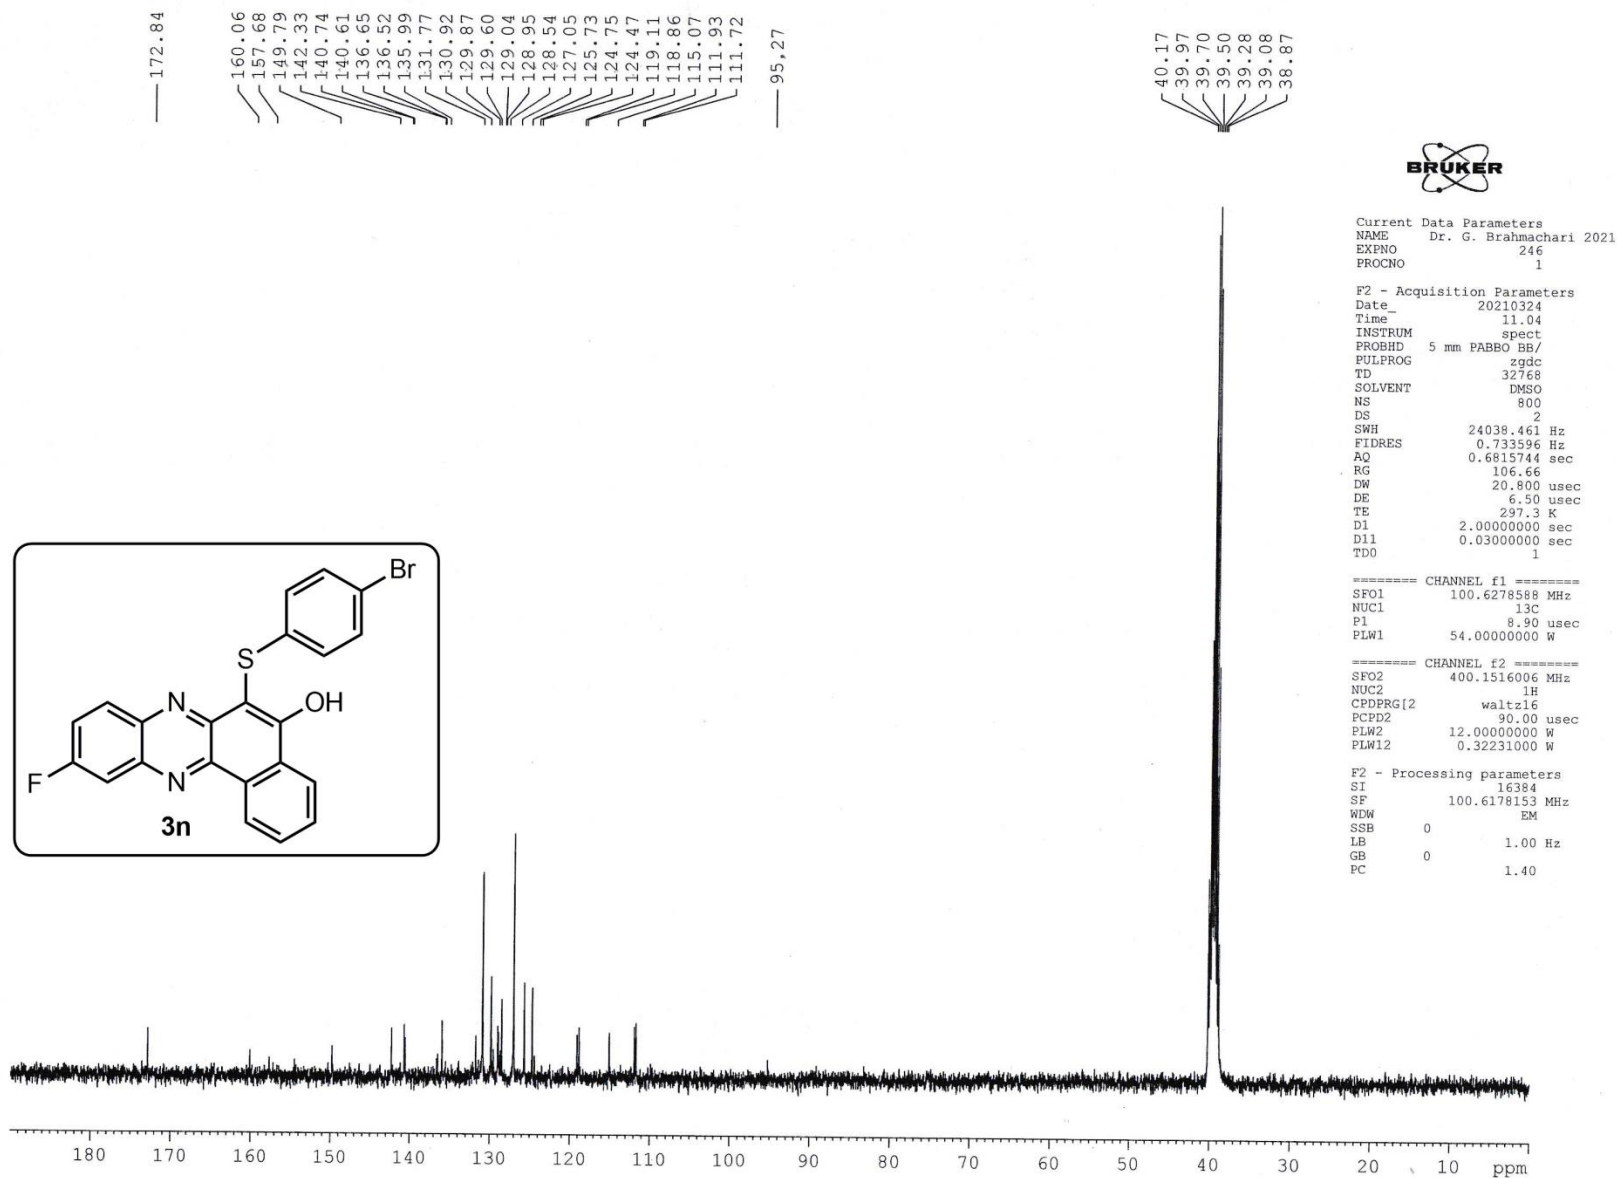

Figure S61. <sup>13</sup>C-NMR spectrum of 6-((4-bromophenyl)thio)-10-fluorobenzo[a]phenazin-5-ol (**3n**)

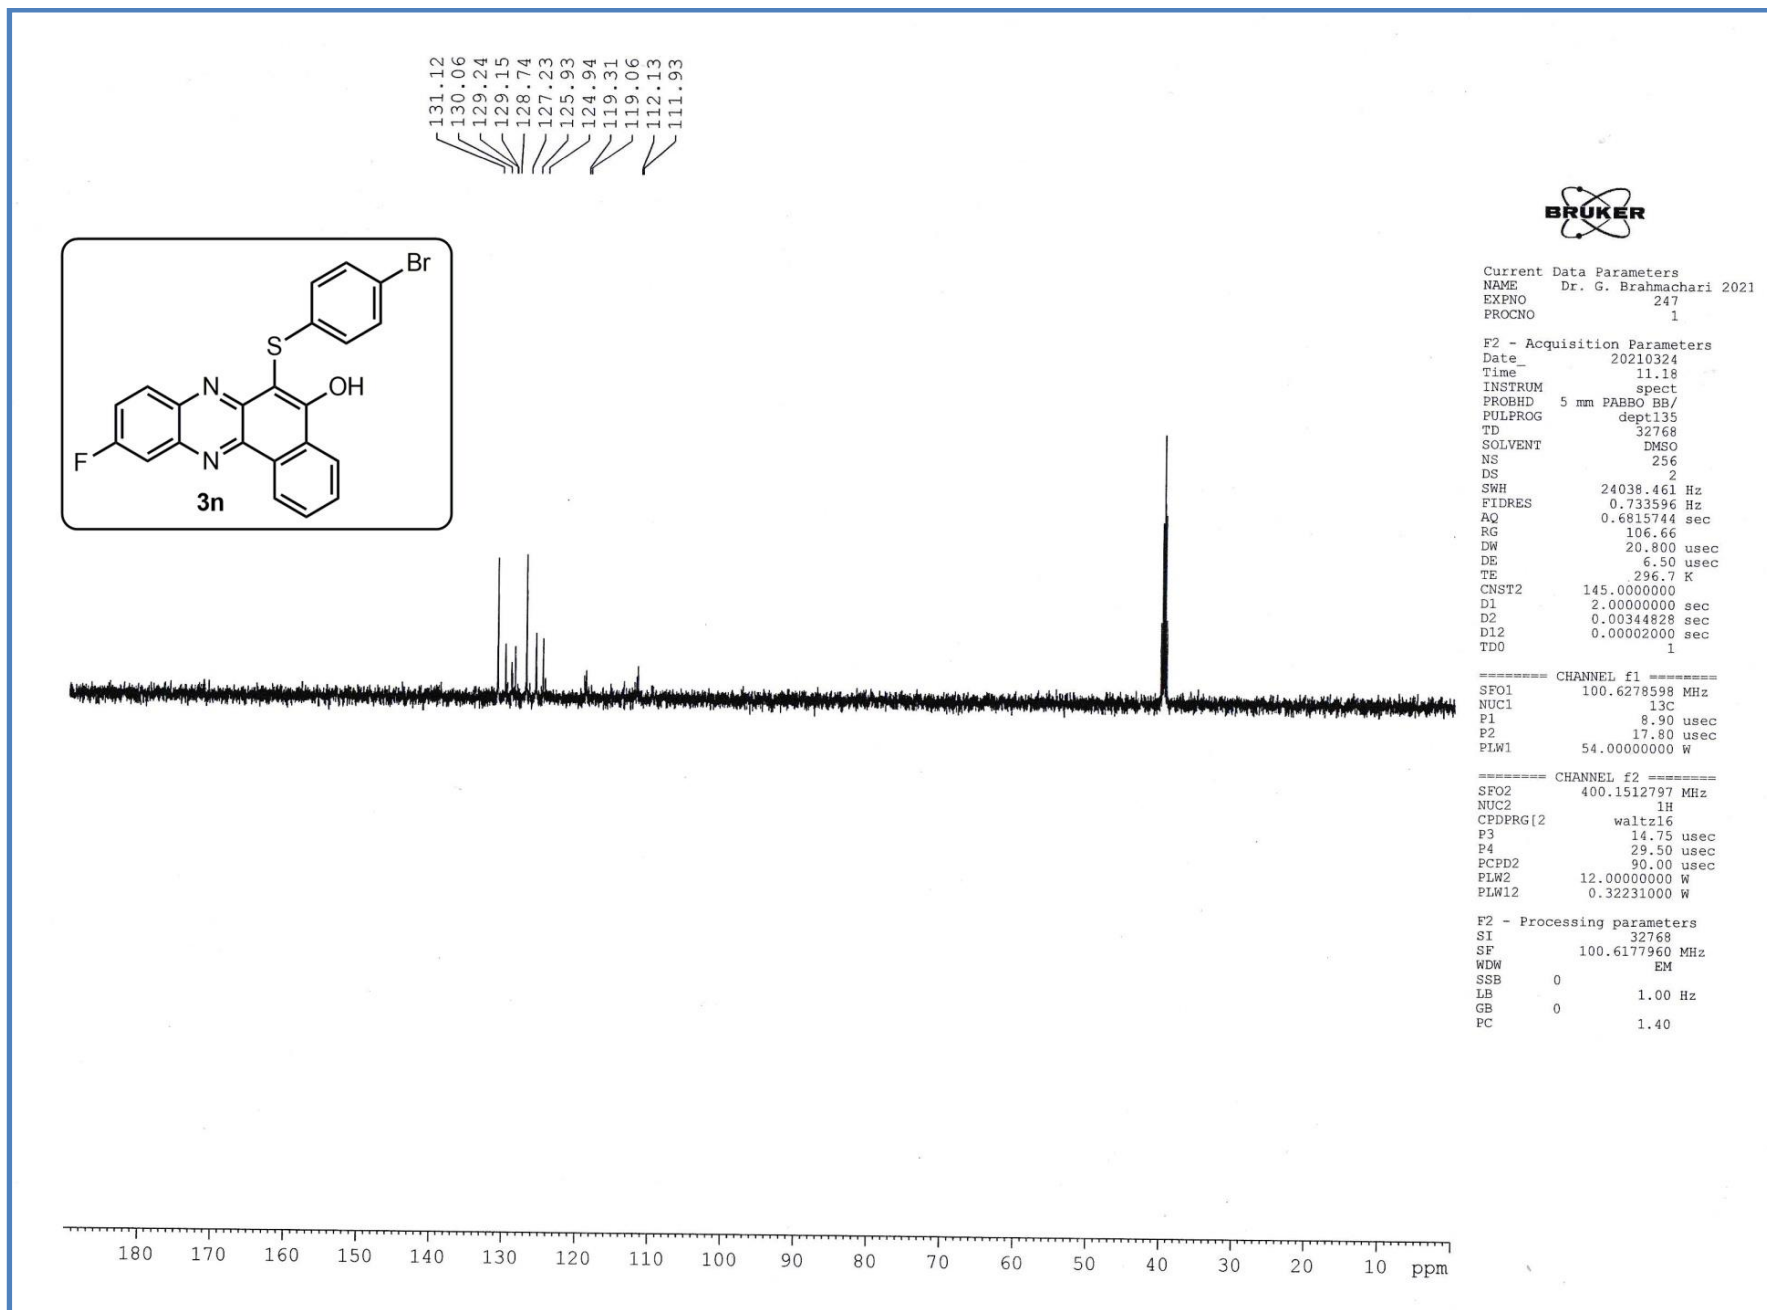

Figure S62. DEPT-135 NMR spectrum of 6-((4-bromophenyl)thio)-10-fluorobenzo[a]phenazin-5-ol (**3n**)

GB-63 6 (0.118) Sm (Mn, 2x3.00); Cm (2:6)

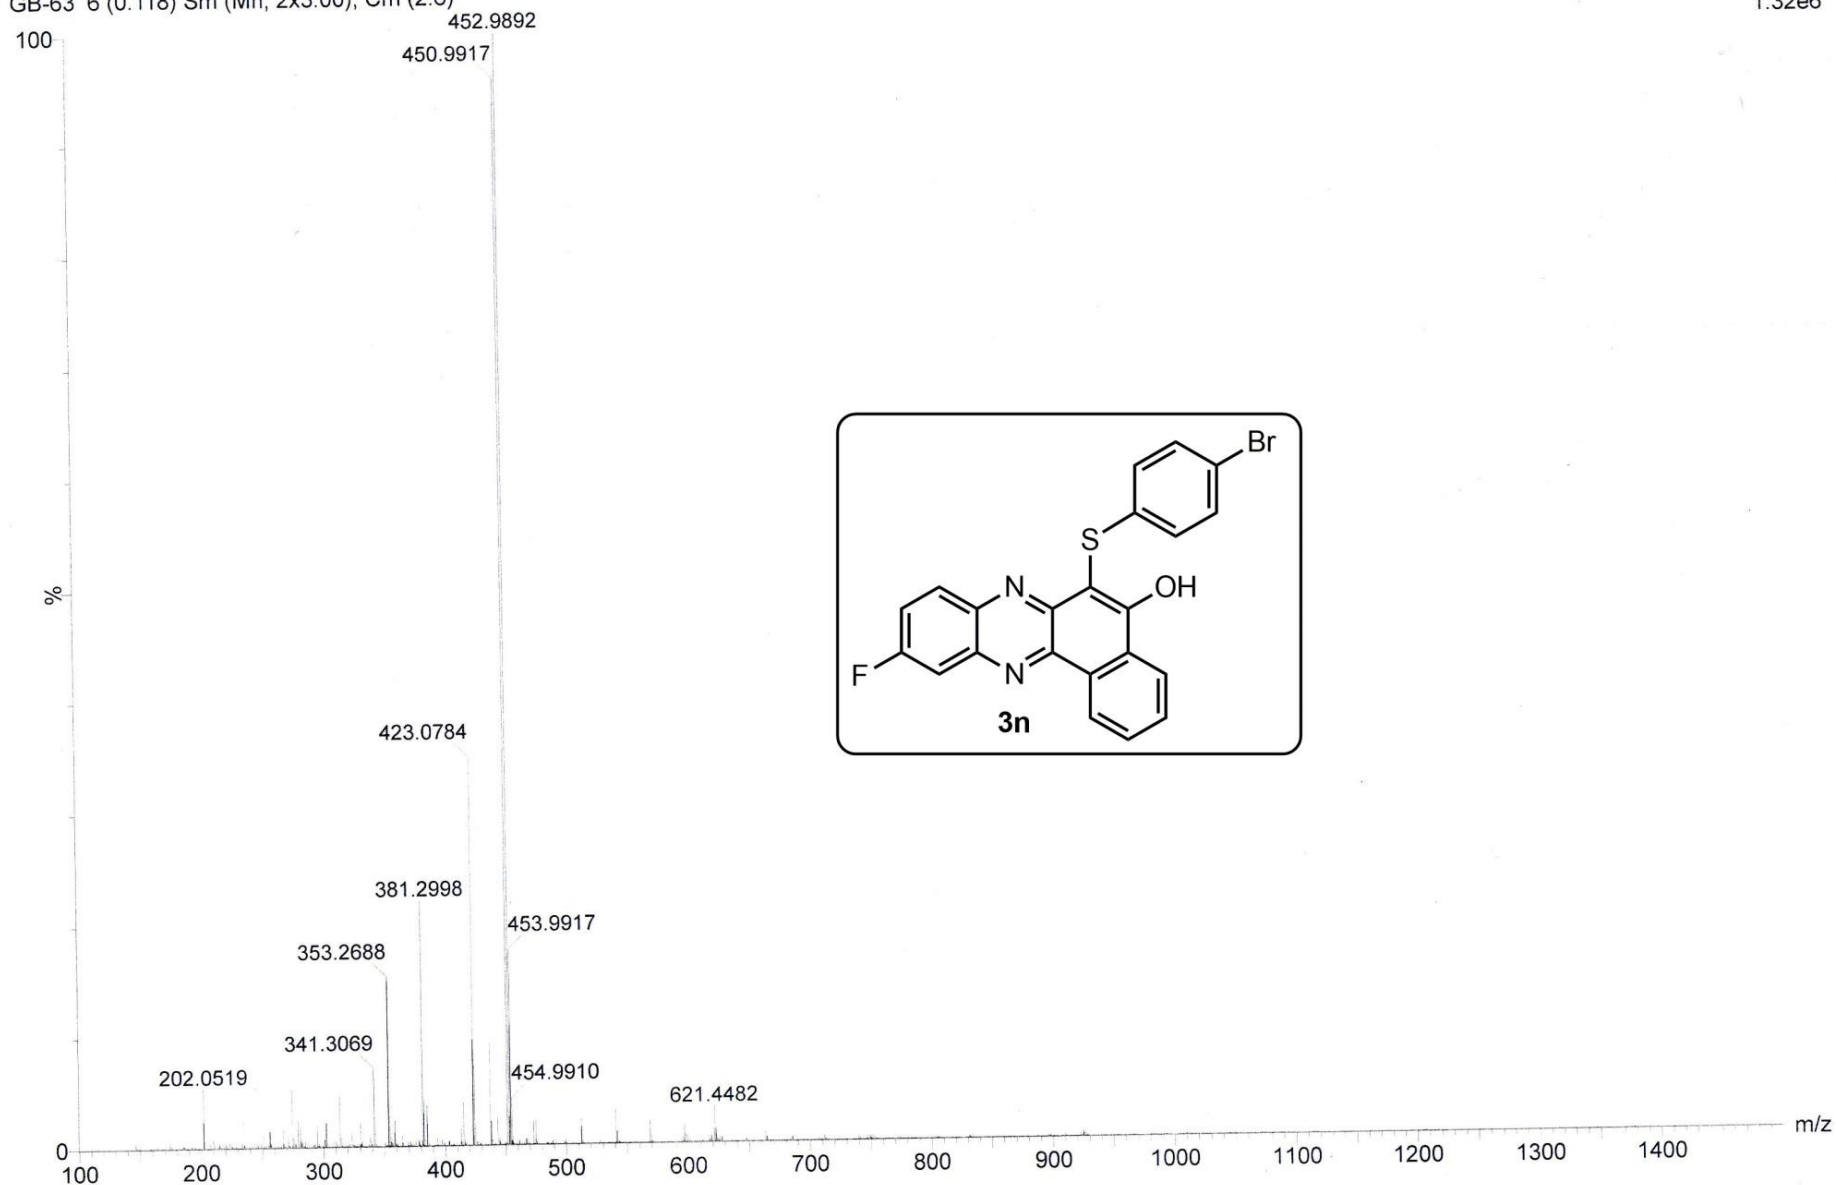Figure S63. High-resolution Mass spectra of 6-((4-bromophenyl)thio)-10-fluorobenzo[a]phenazin-5-ol (**3n**)

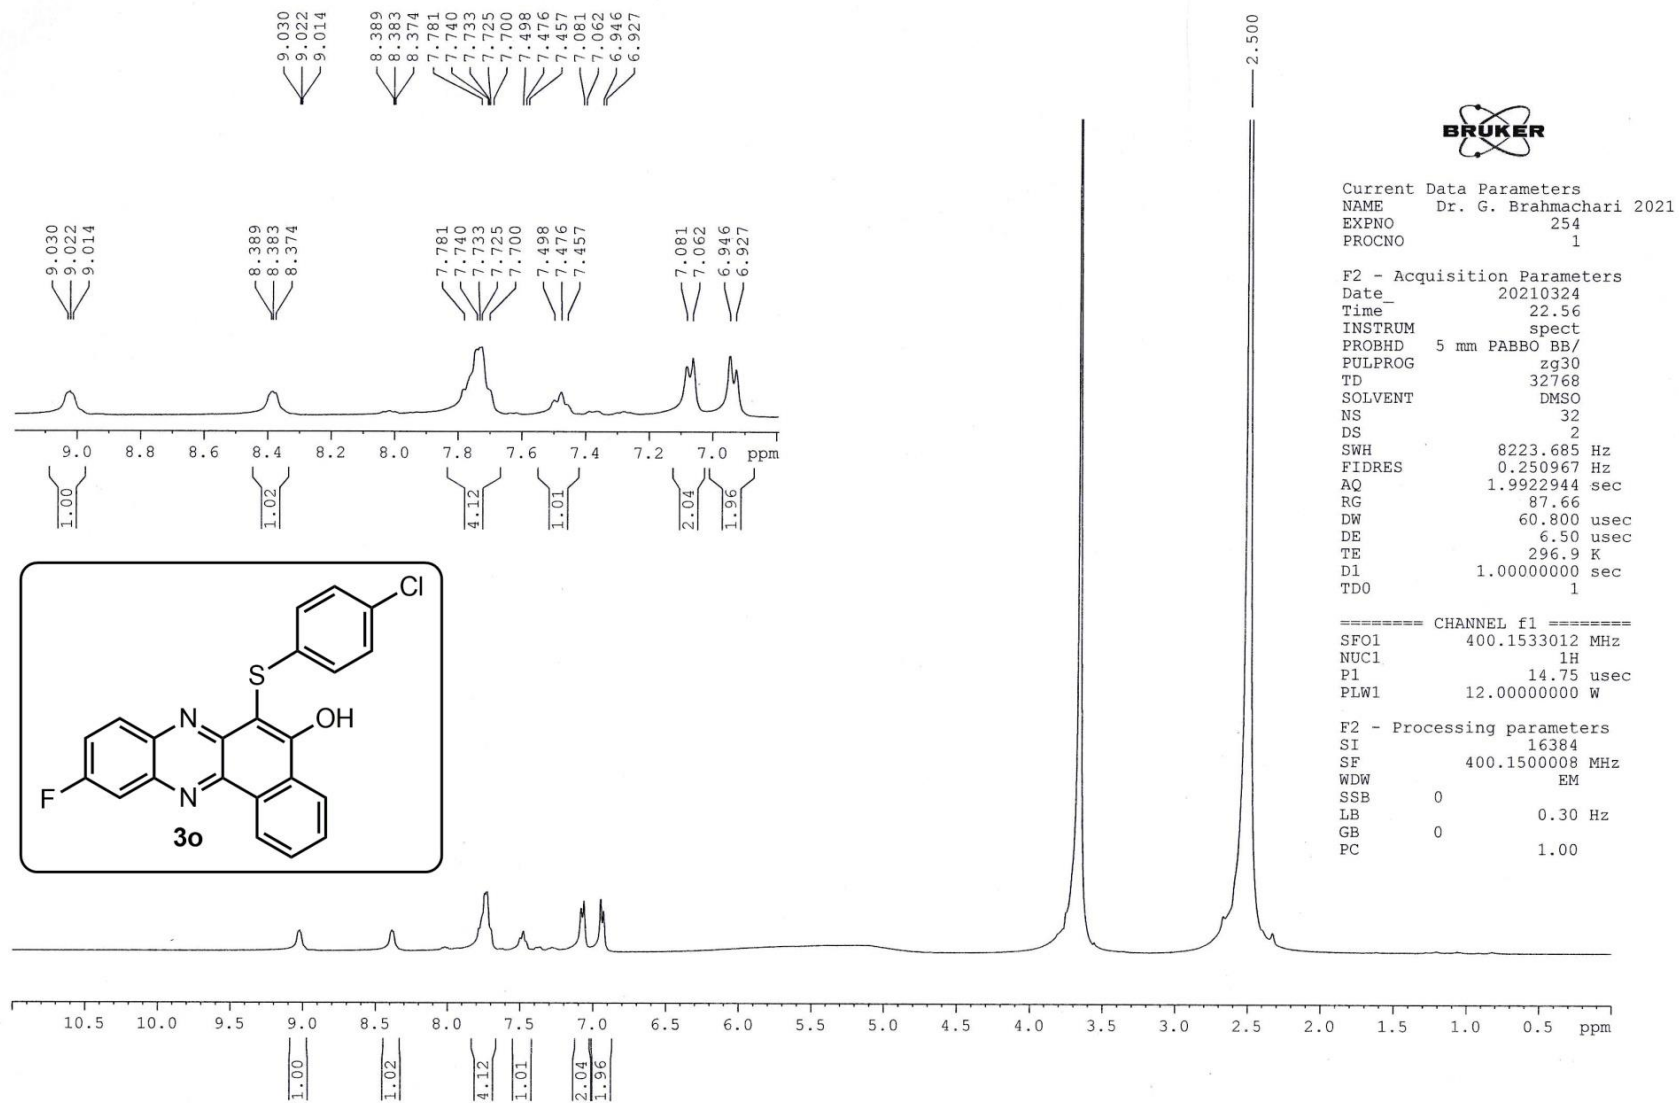

Figure S64. <sup>1</sup>H-NMR spectrum of 6-((4-chlorophenyl)thio)-10-fluorobenzo[*a*]phenazin-5-ol (**30**)

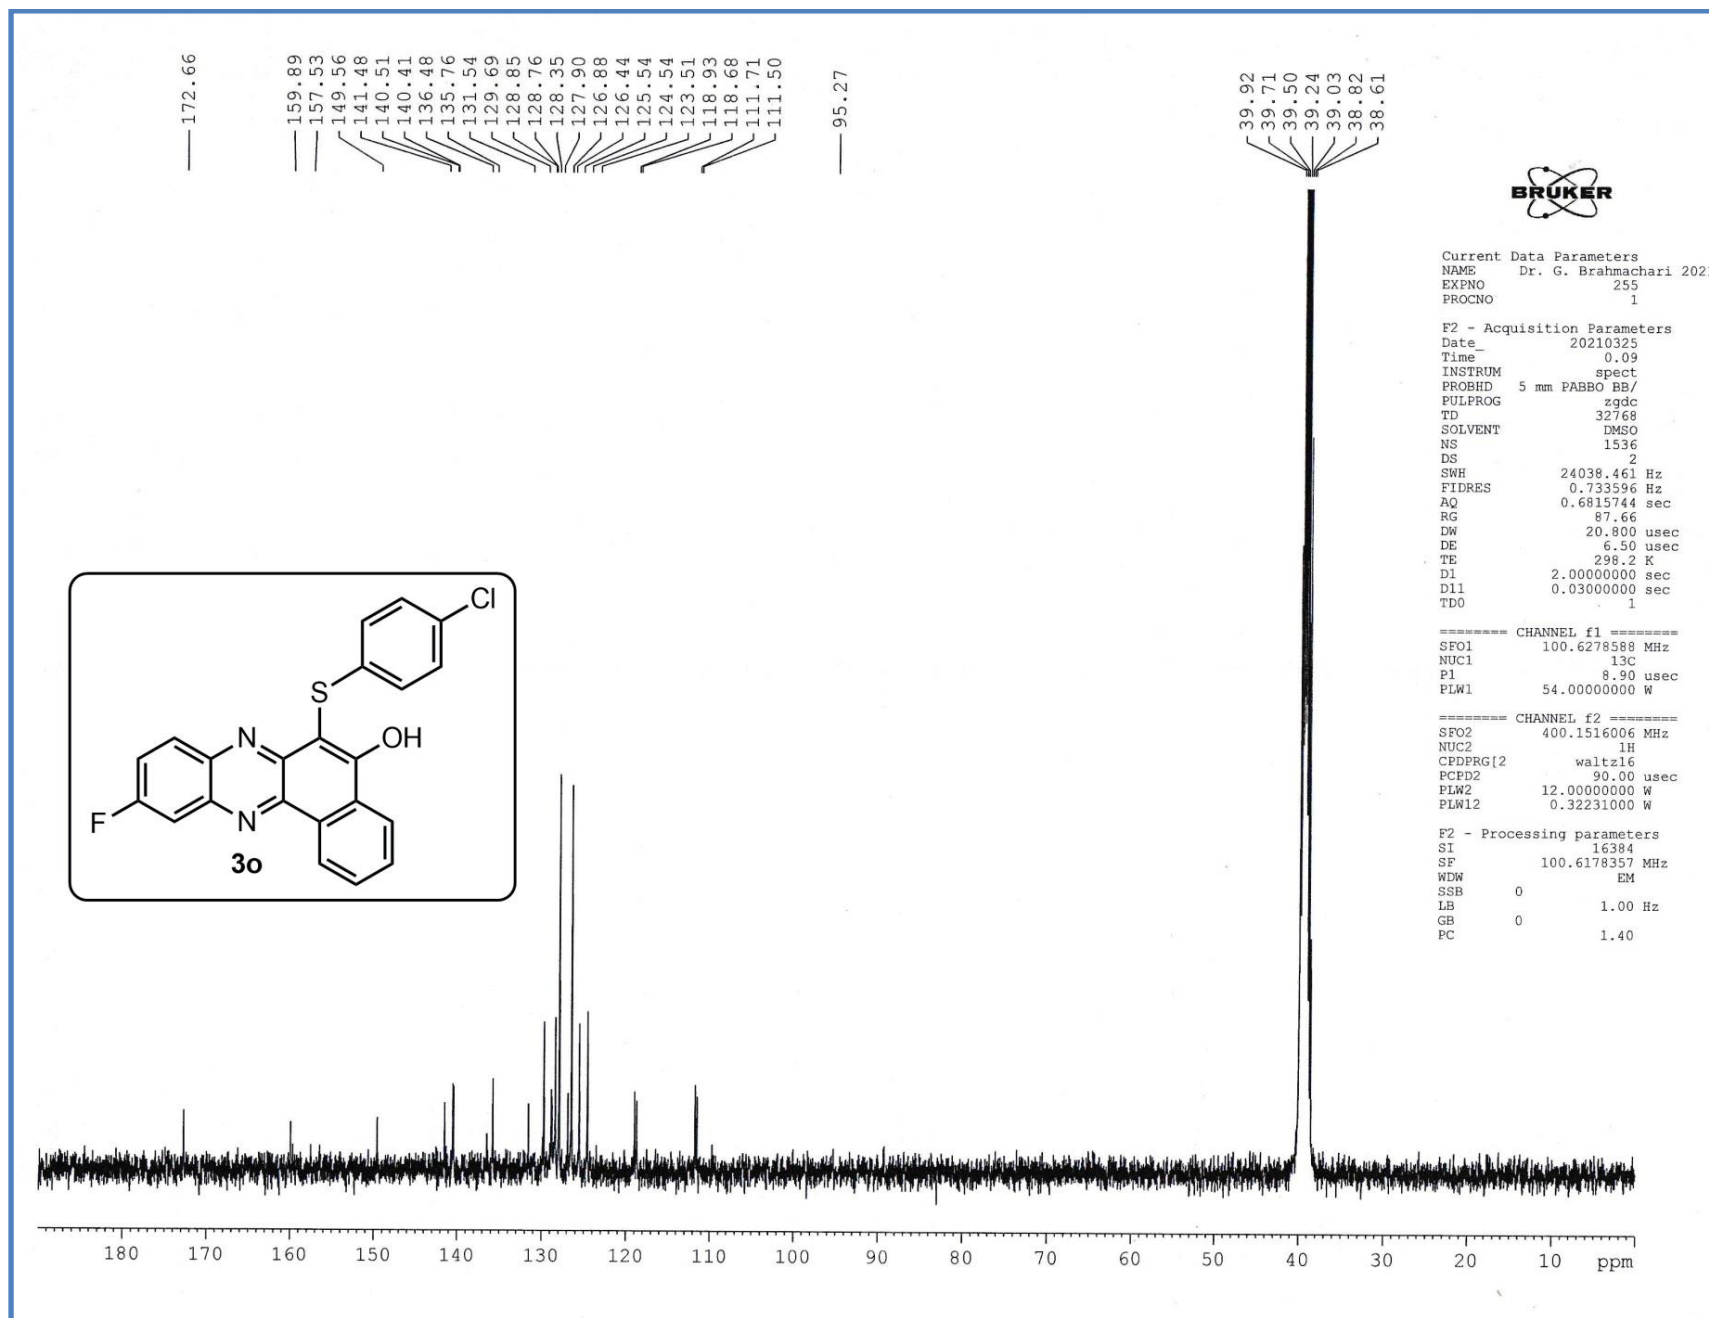

Figure S65. <sup>13</sup>C-NMR spectrum of 6-((4-chlorophenyl)thio)-10-fluorobenzo[*a*]phenazin-5-ol (**3o**)  
 S78



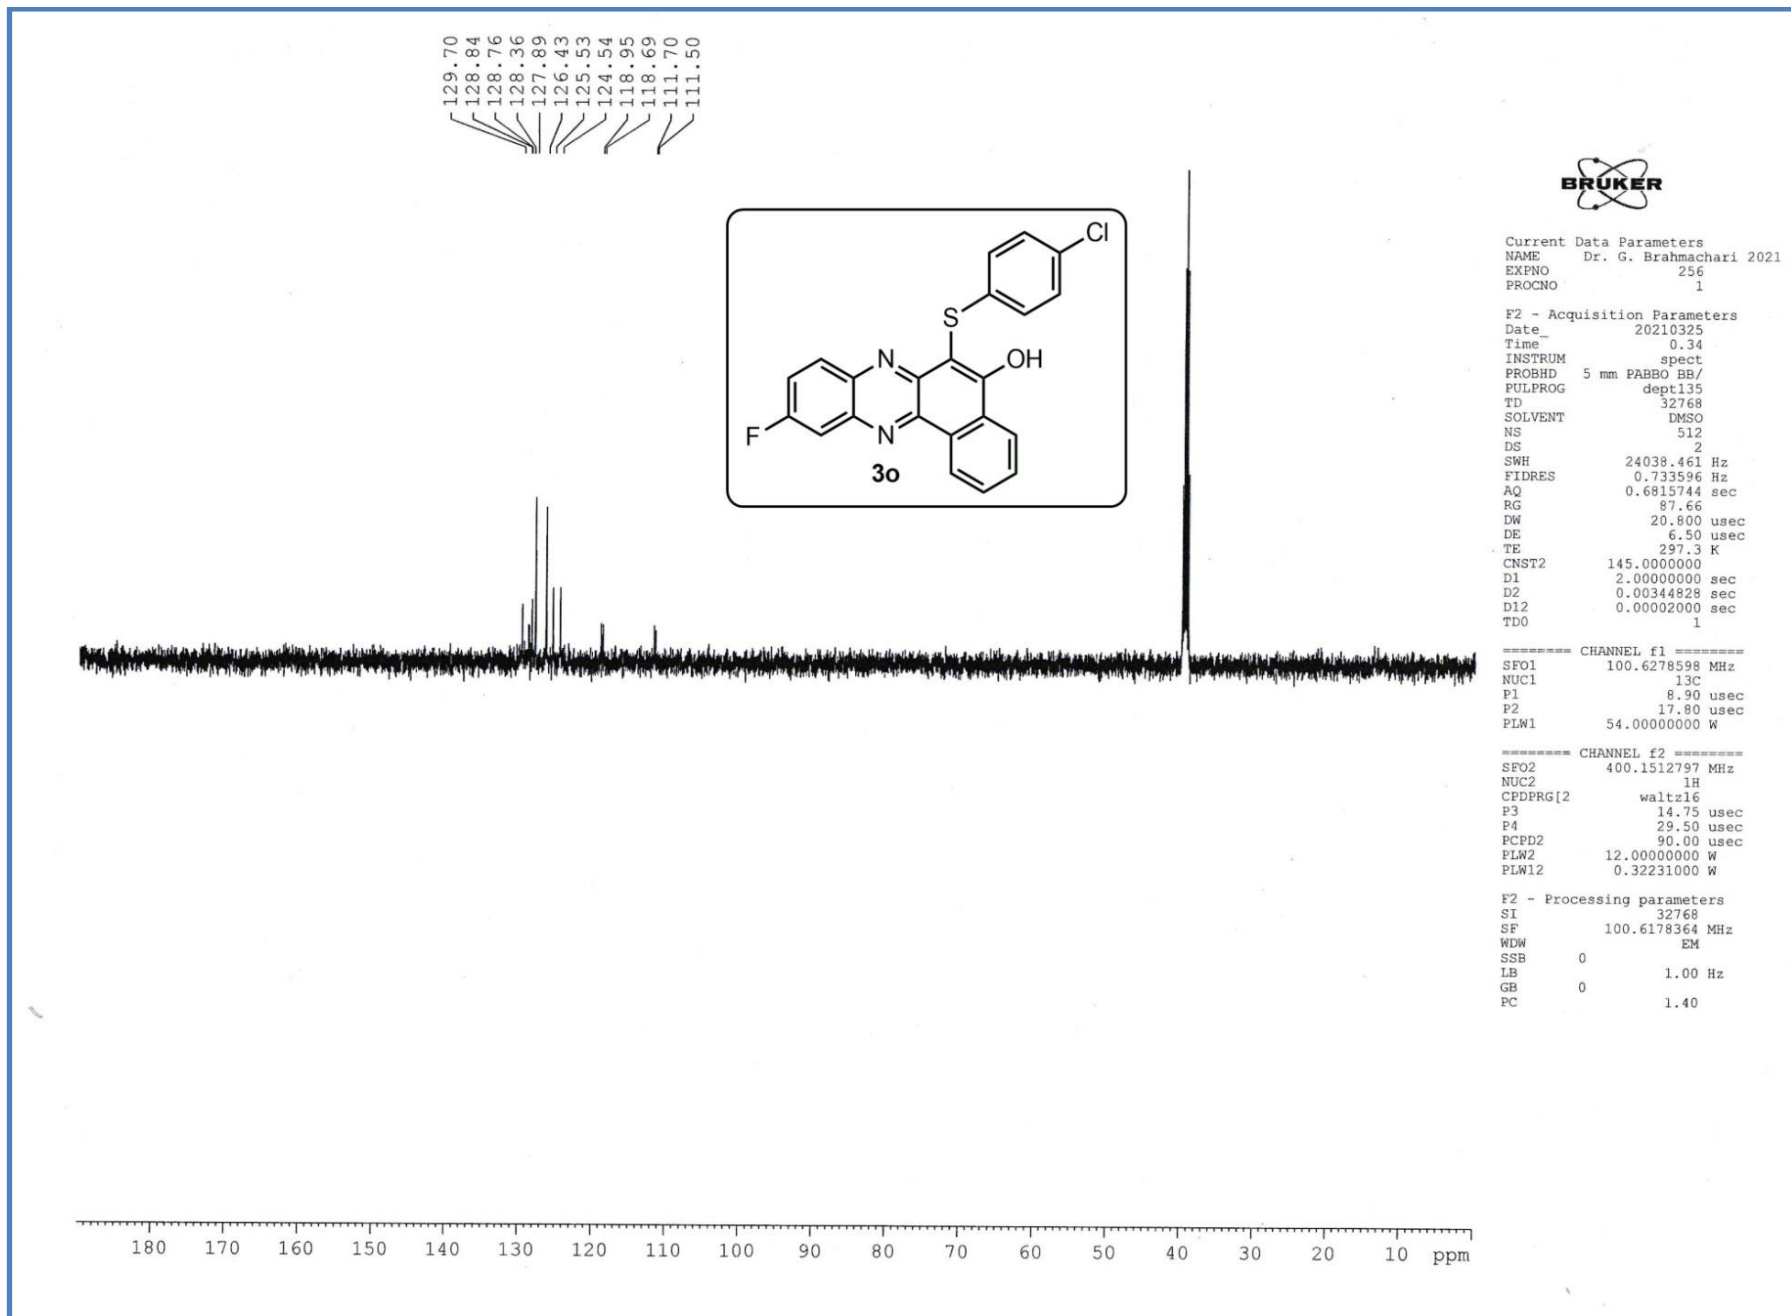

Figure S66. DEPT-135 NMR spectrum of 6-((4-chlorophenyl)thio)-10-fluorobenzo[*a*]phenazin-5-ol (**3o**)

GB-64 5 (0.101) Sm (Mn, 2x3.00); Cm (2:5)

TOF MS ES+  
5.23e6

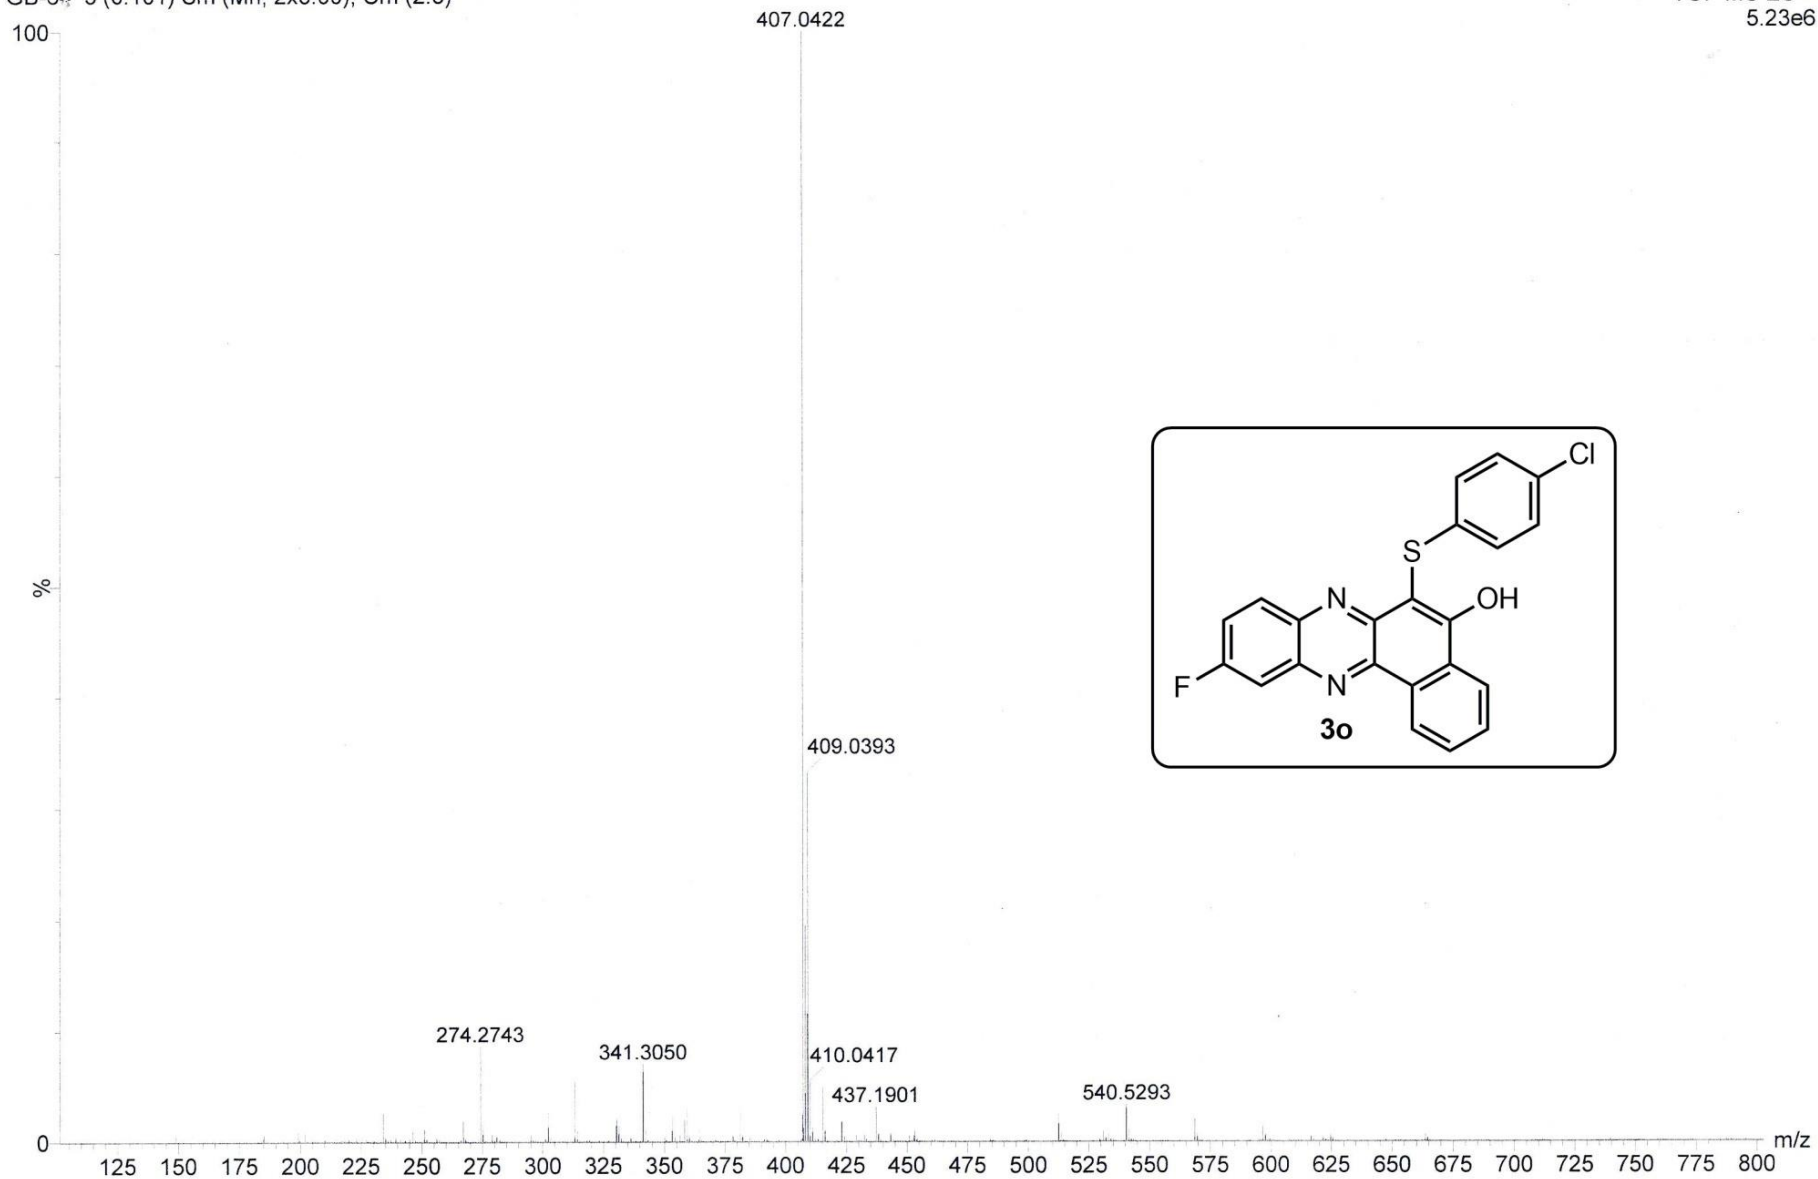

Figure S67. High-resolution Mass spectra of 6-((4-chlorophenyl)thio)-10-fluorobenzo[*a*]phenazin-5-ol (**3o**)

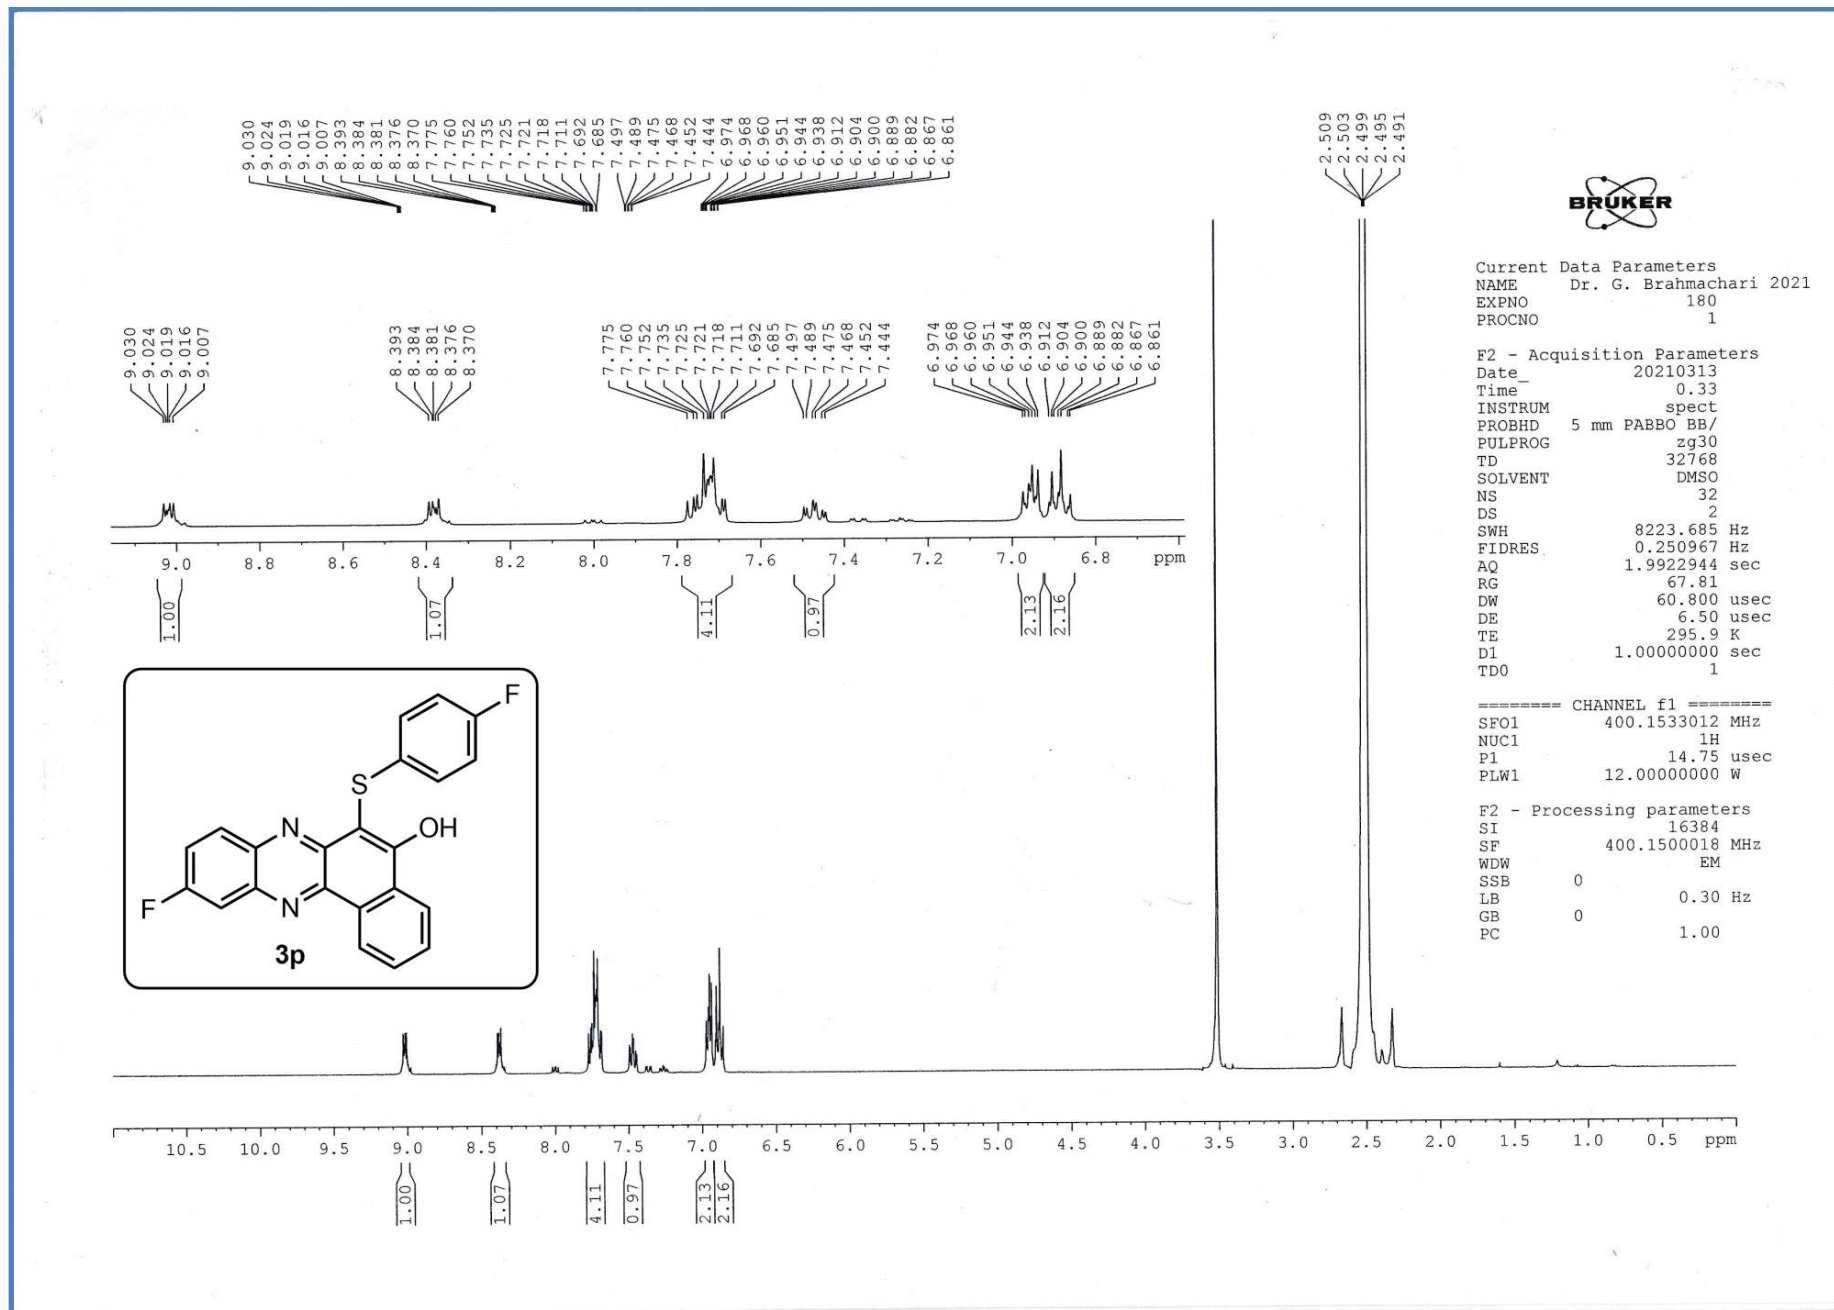

Figure S68. <sup>1</sup>H-NMR spectrum of 10-fluoro-6-((4-fluorophenyl)thio)benzo[*a*]phenazin-5-ol (**3p**)

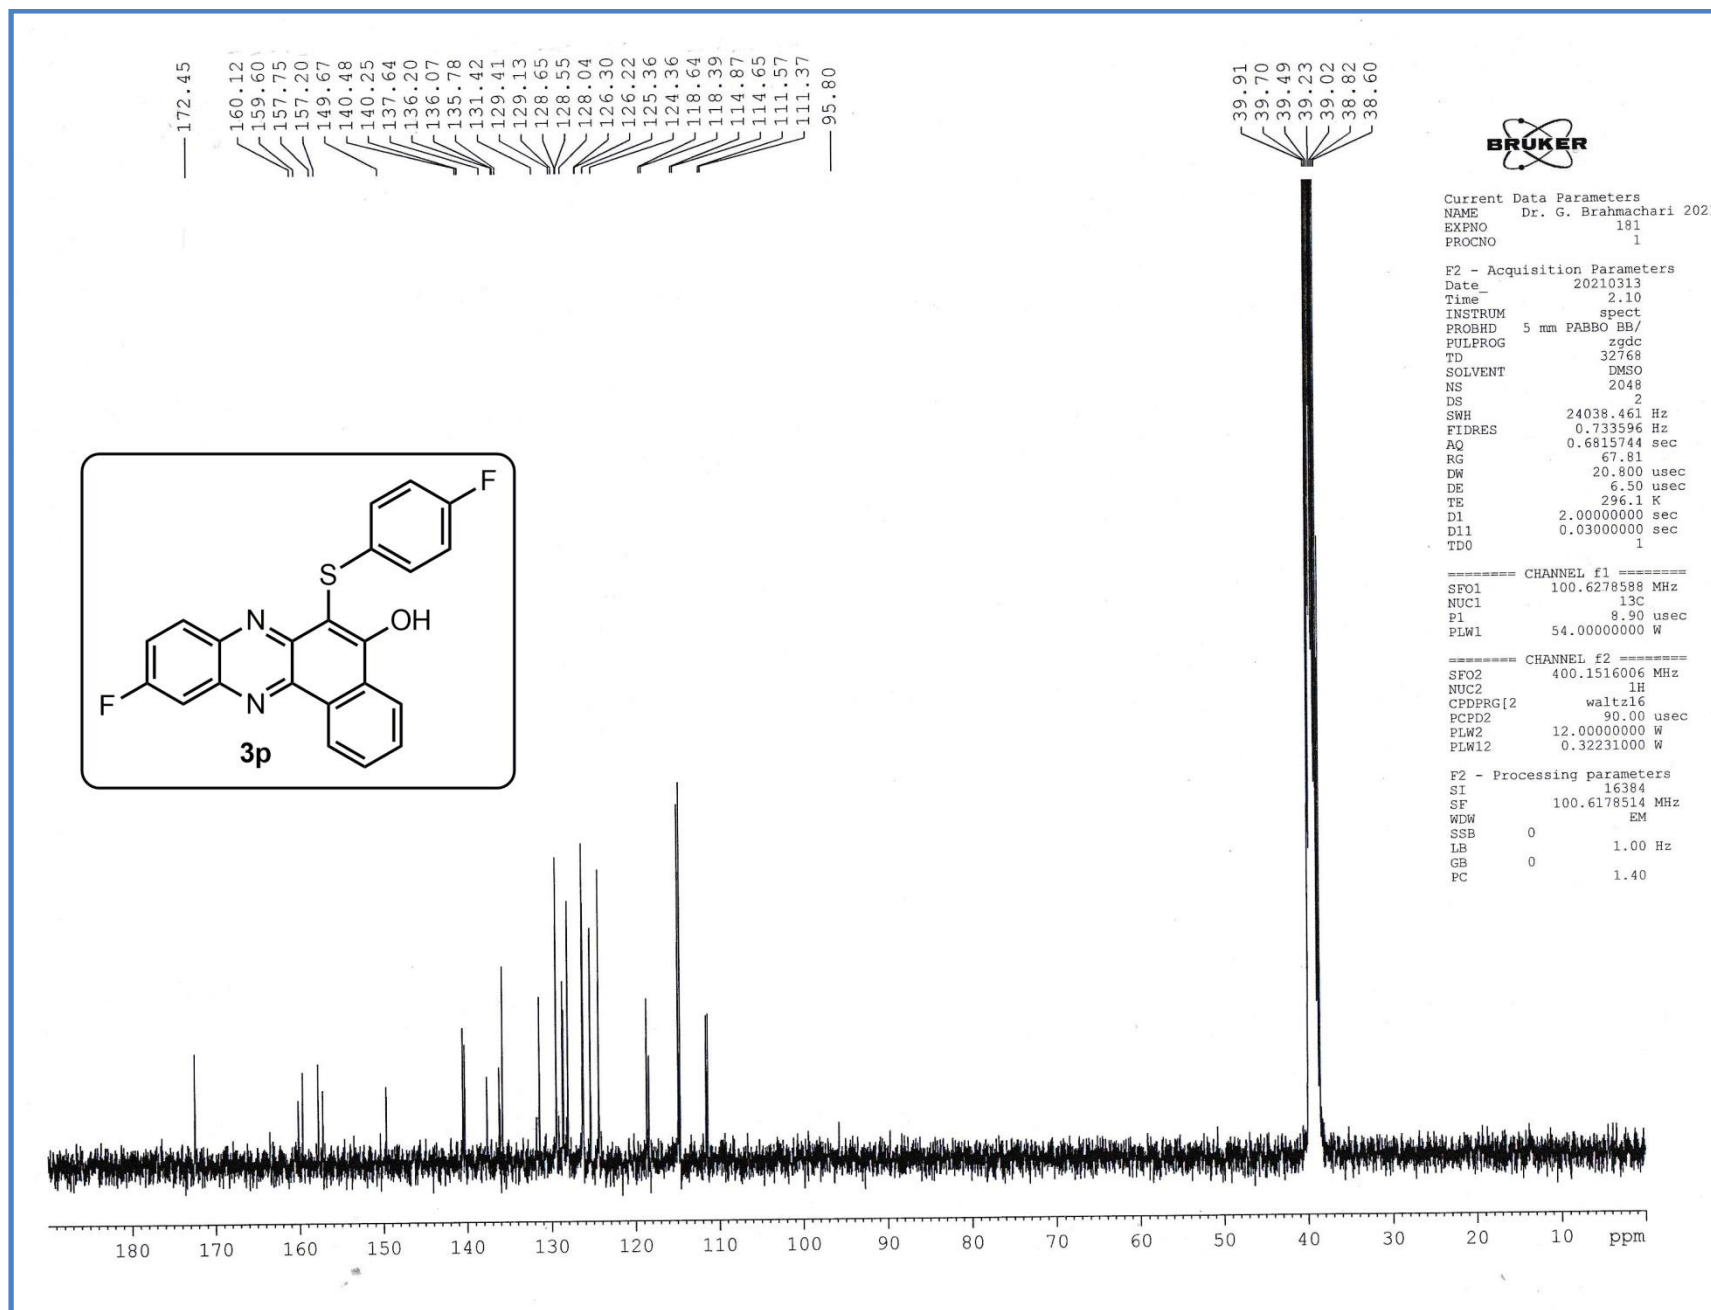

Figure S69. <sup>13</sup>C-NMR spectrum of 10-fluoro-6-((4-fluorophenyl)thio)benzo[*a*]phenazin-5-ol (**3p**)

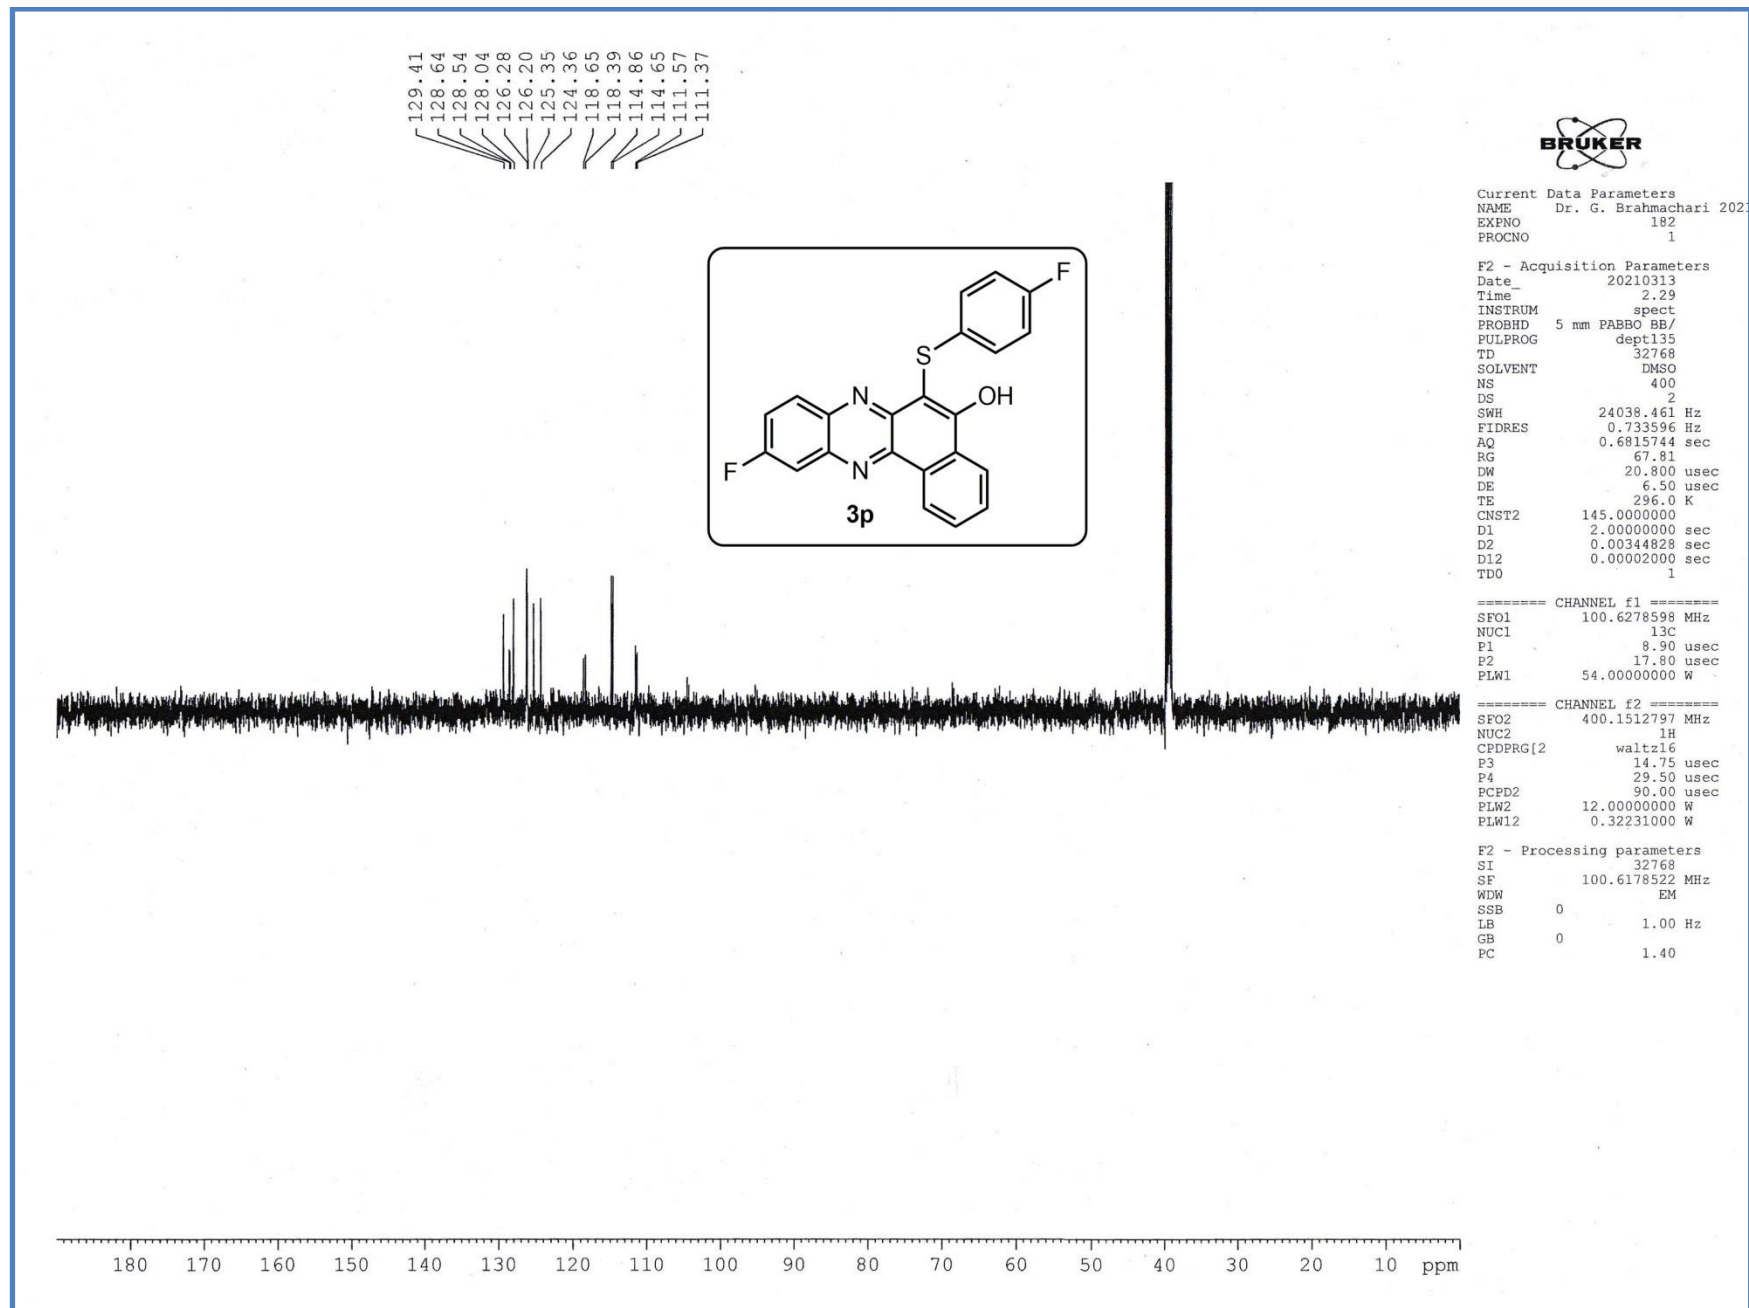

Figure S70. DEPT-135 NMR spectrum of 10-fluoro-6-((4-fluorophenyl)thio)benzo[*a*]phenazin-5-ol (**3p**)

# User Spectrum Plot Report

|                |        |              |                   |         |                                    |
|----------------|--------|--------------|-------------------|---------|------------------------------------|
| Name           | GB-3   | Rack Pos.    | Instrument        | ESI-MS  | Operator                           |
| Inj. Vol. (ul) | 2      | Plate Pos.   | IRM Status        | Success |                                    |
| Data File      | GB-3.d | Method (Acq) | ORGANIC METHODE.m | Comment | Acq. Time (Local)                  |
|                |        |              |                   |         | 29-09-2021 14:21:41<br>(UTC+05:30) |

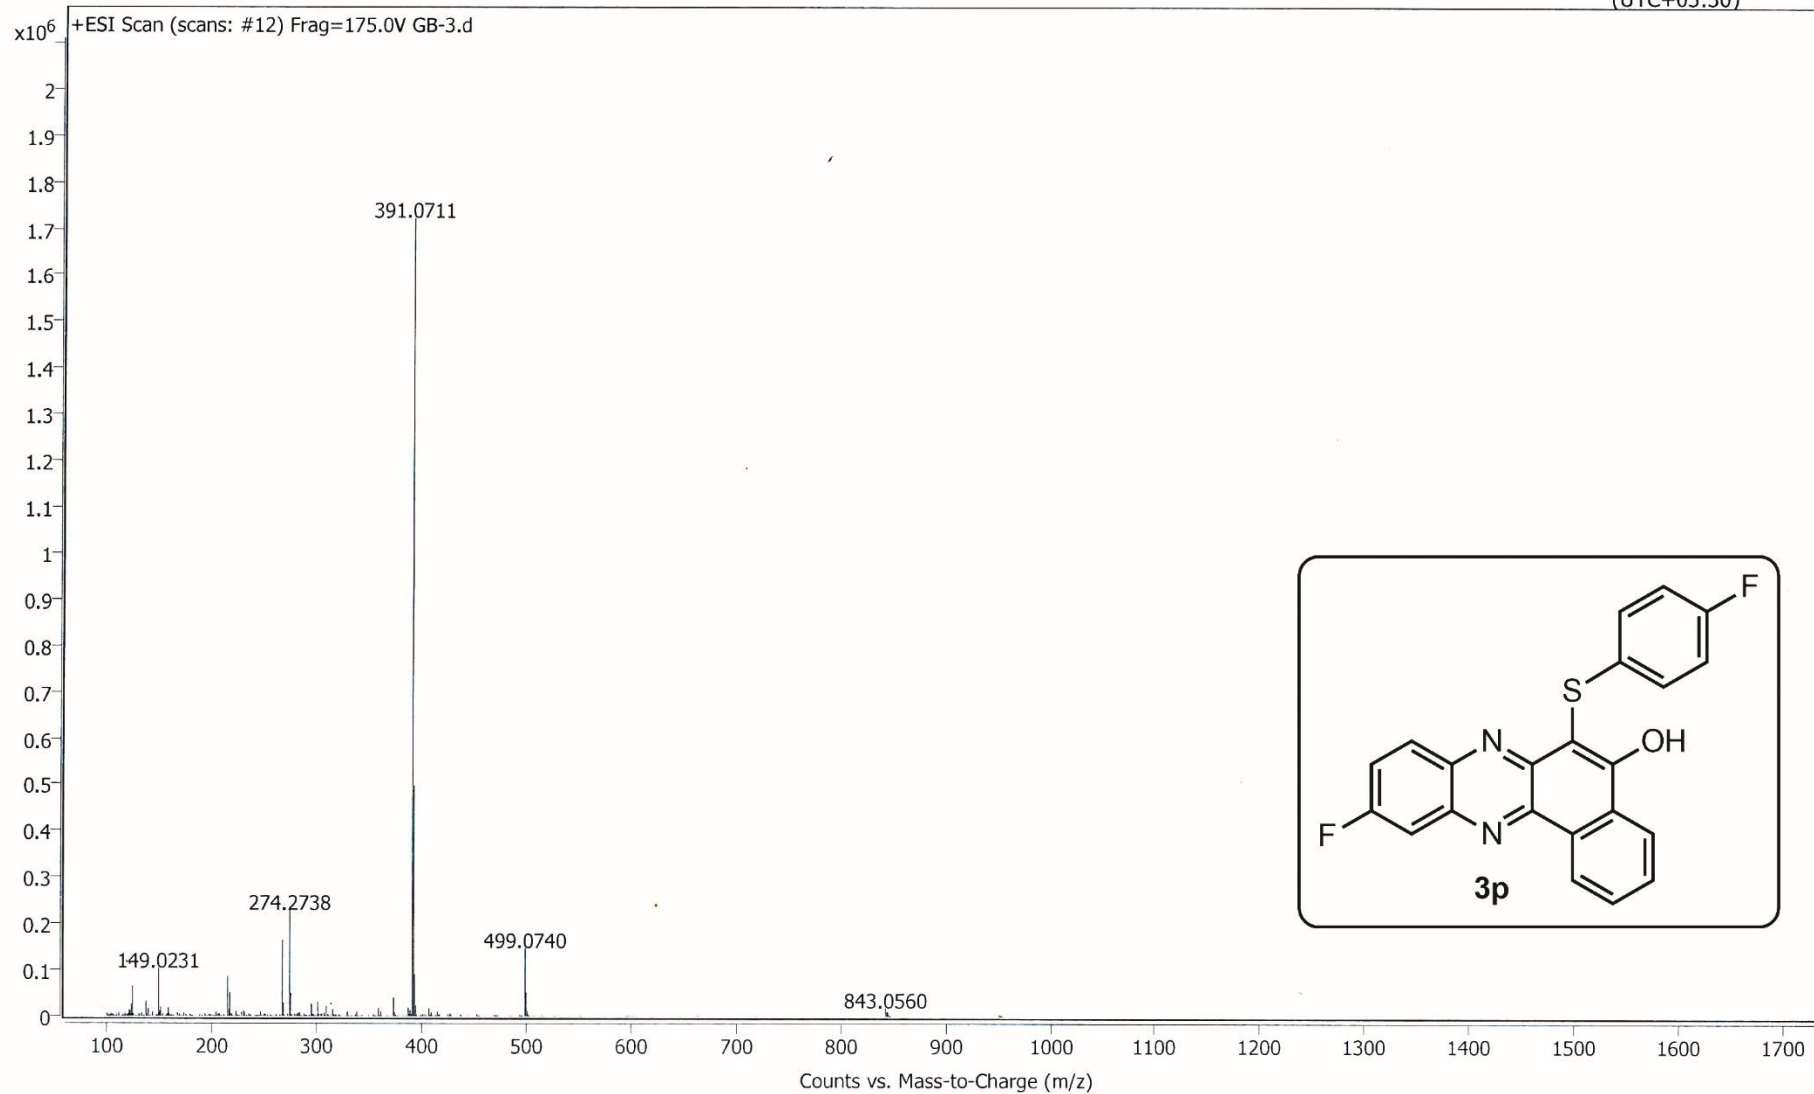

Figure S71. High-resolution Mass spectra of 10-fluoro-6-((4-fluorophenyl)thio)benzo[a]phenazin-5-ol (**3p**)

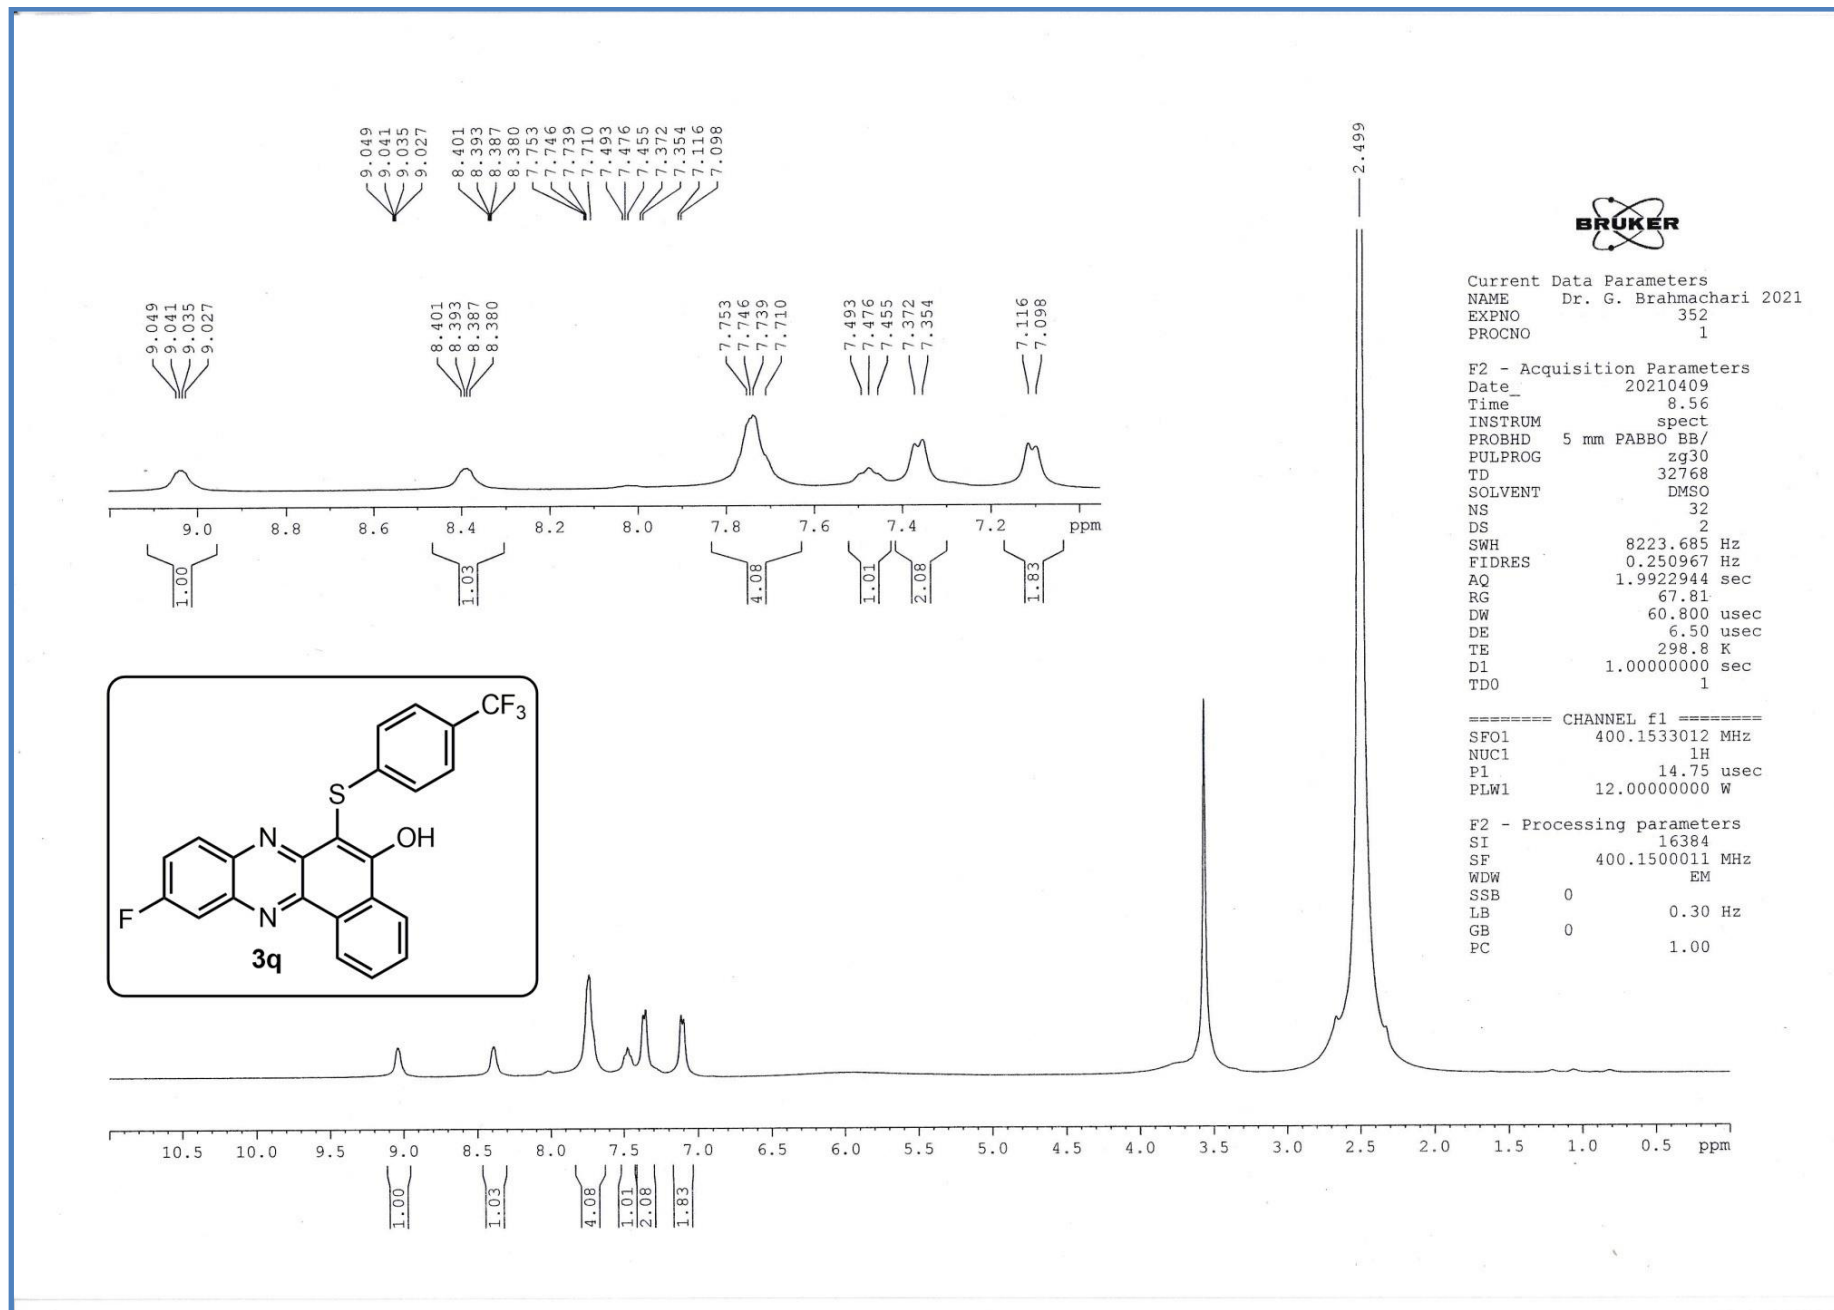

Figure S72. <sup>1</sup>H-NMR spectrum of 10-fluoro-6-((4-(trifluoromethyl)phenyl)thio)benzo[*a*]phenazin-5-ol (**3q**)

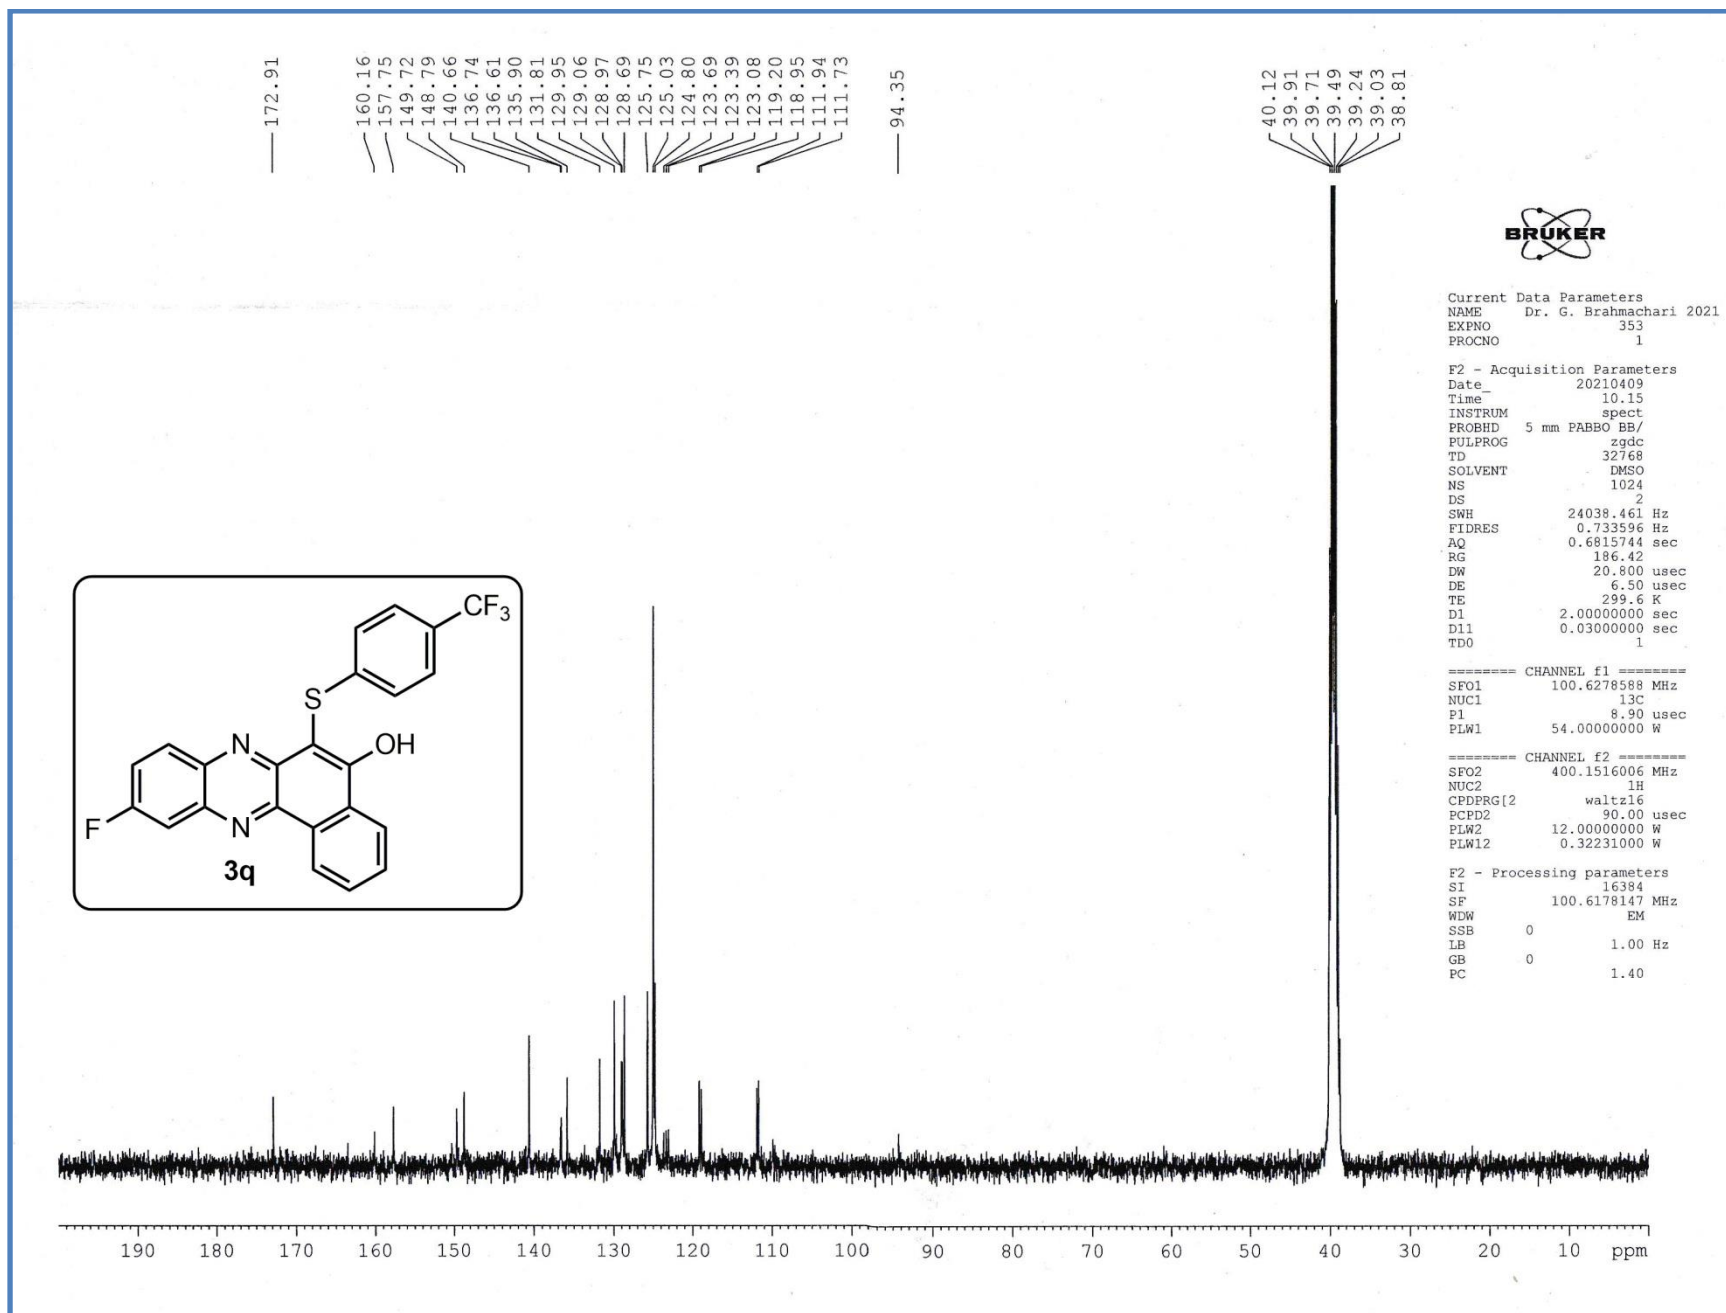

Figure S73. <sup>13</sup>C-NMR spectrum of 10-fluoro-6-((4-(trifluoromethyl)phenyl)thio)benzo[*a*]phenazin-5-ol (**3q**)



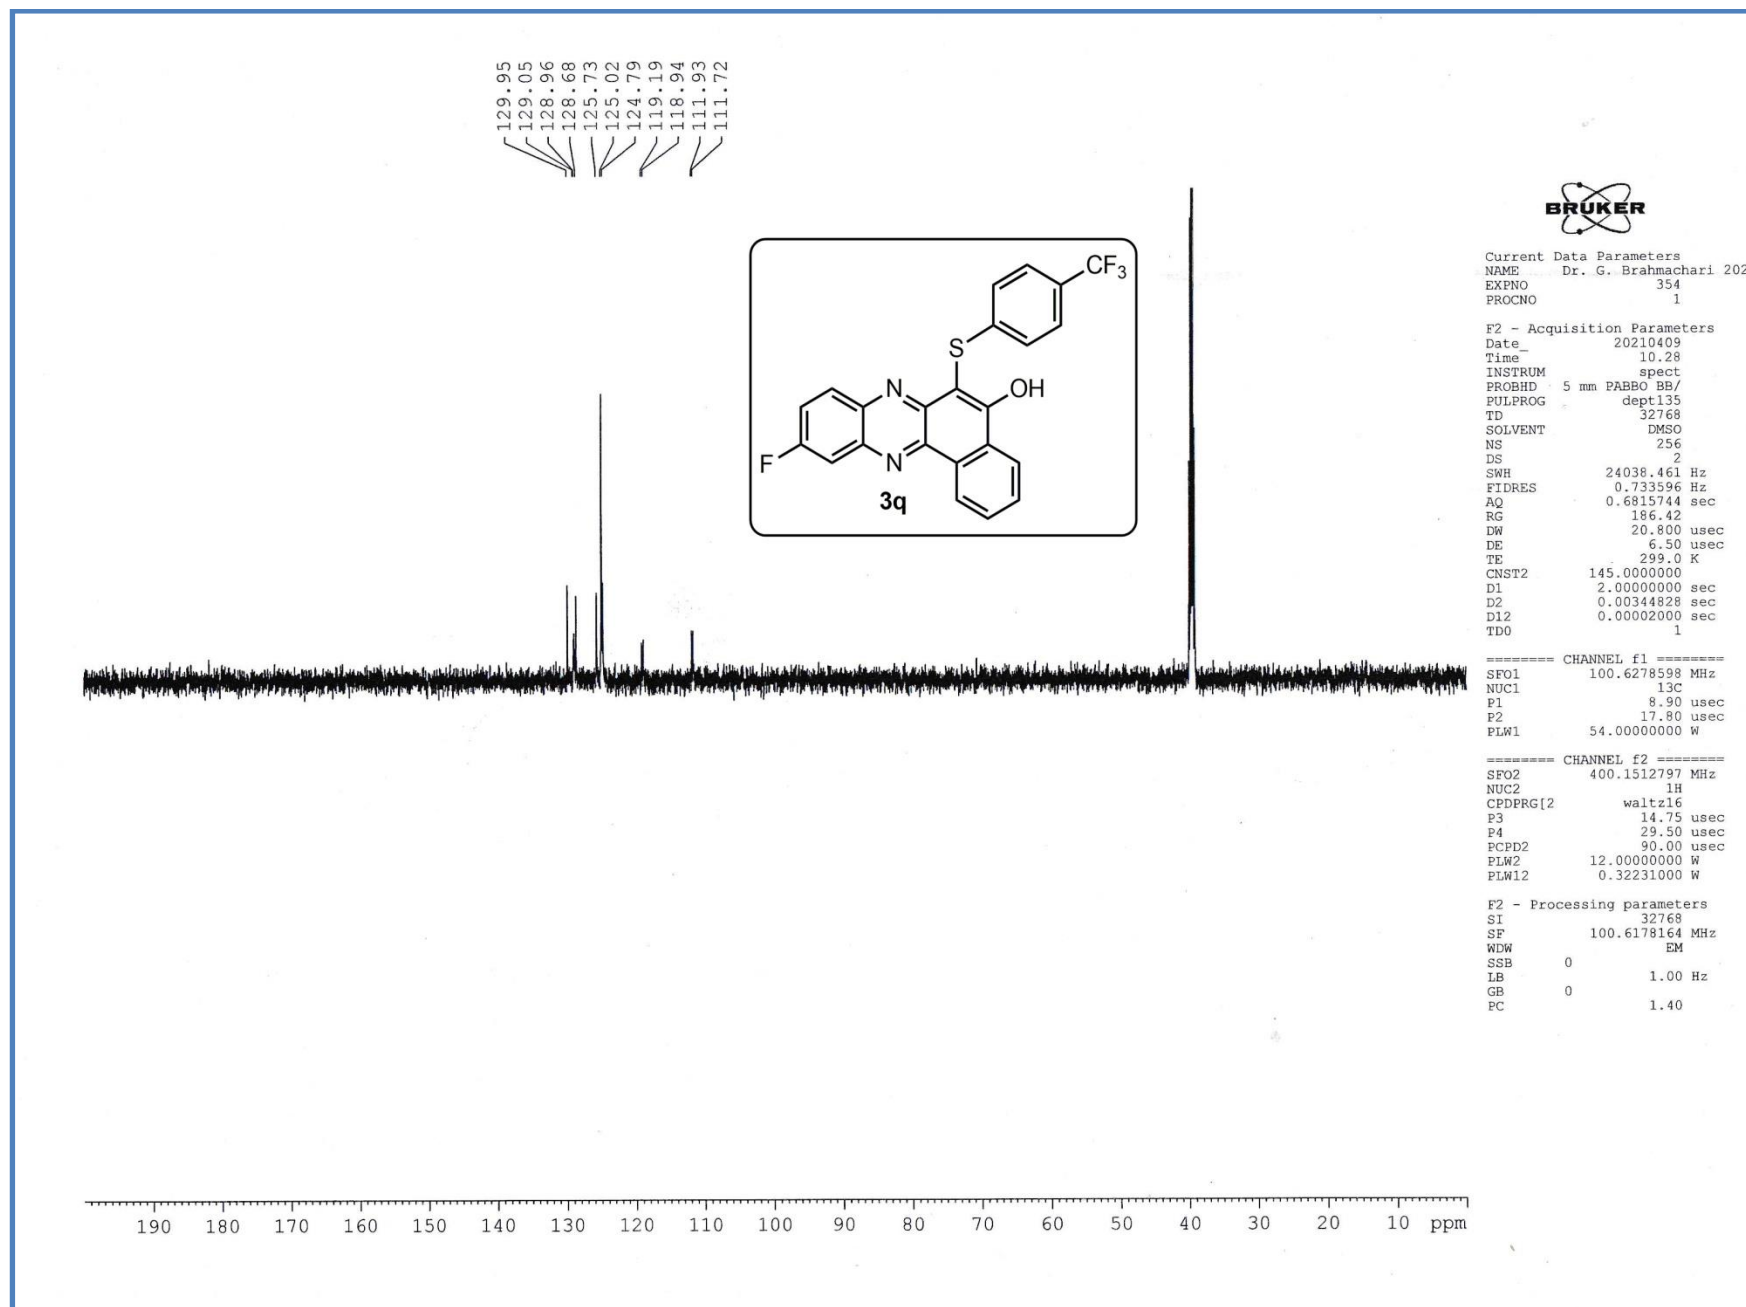

Figure S74. DEPT-135 NMR spectrum of 10-fluoro-6-((4-(trifluoromethyl)phenyl)thio)benzo[*a*]phenazin-5-ol (**3q**)

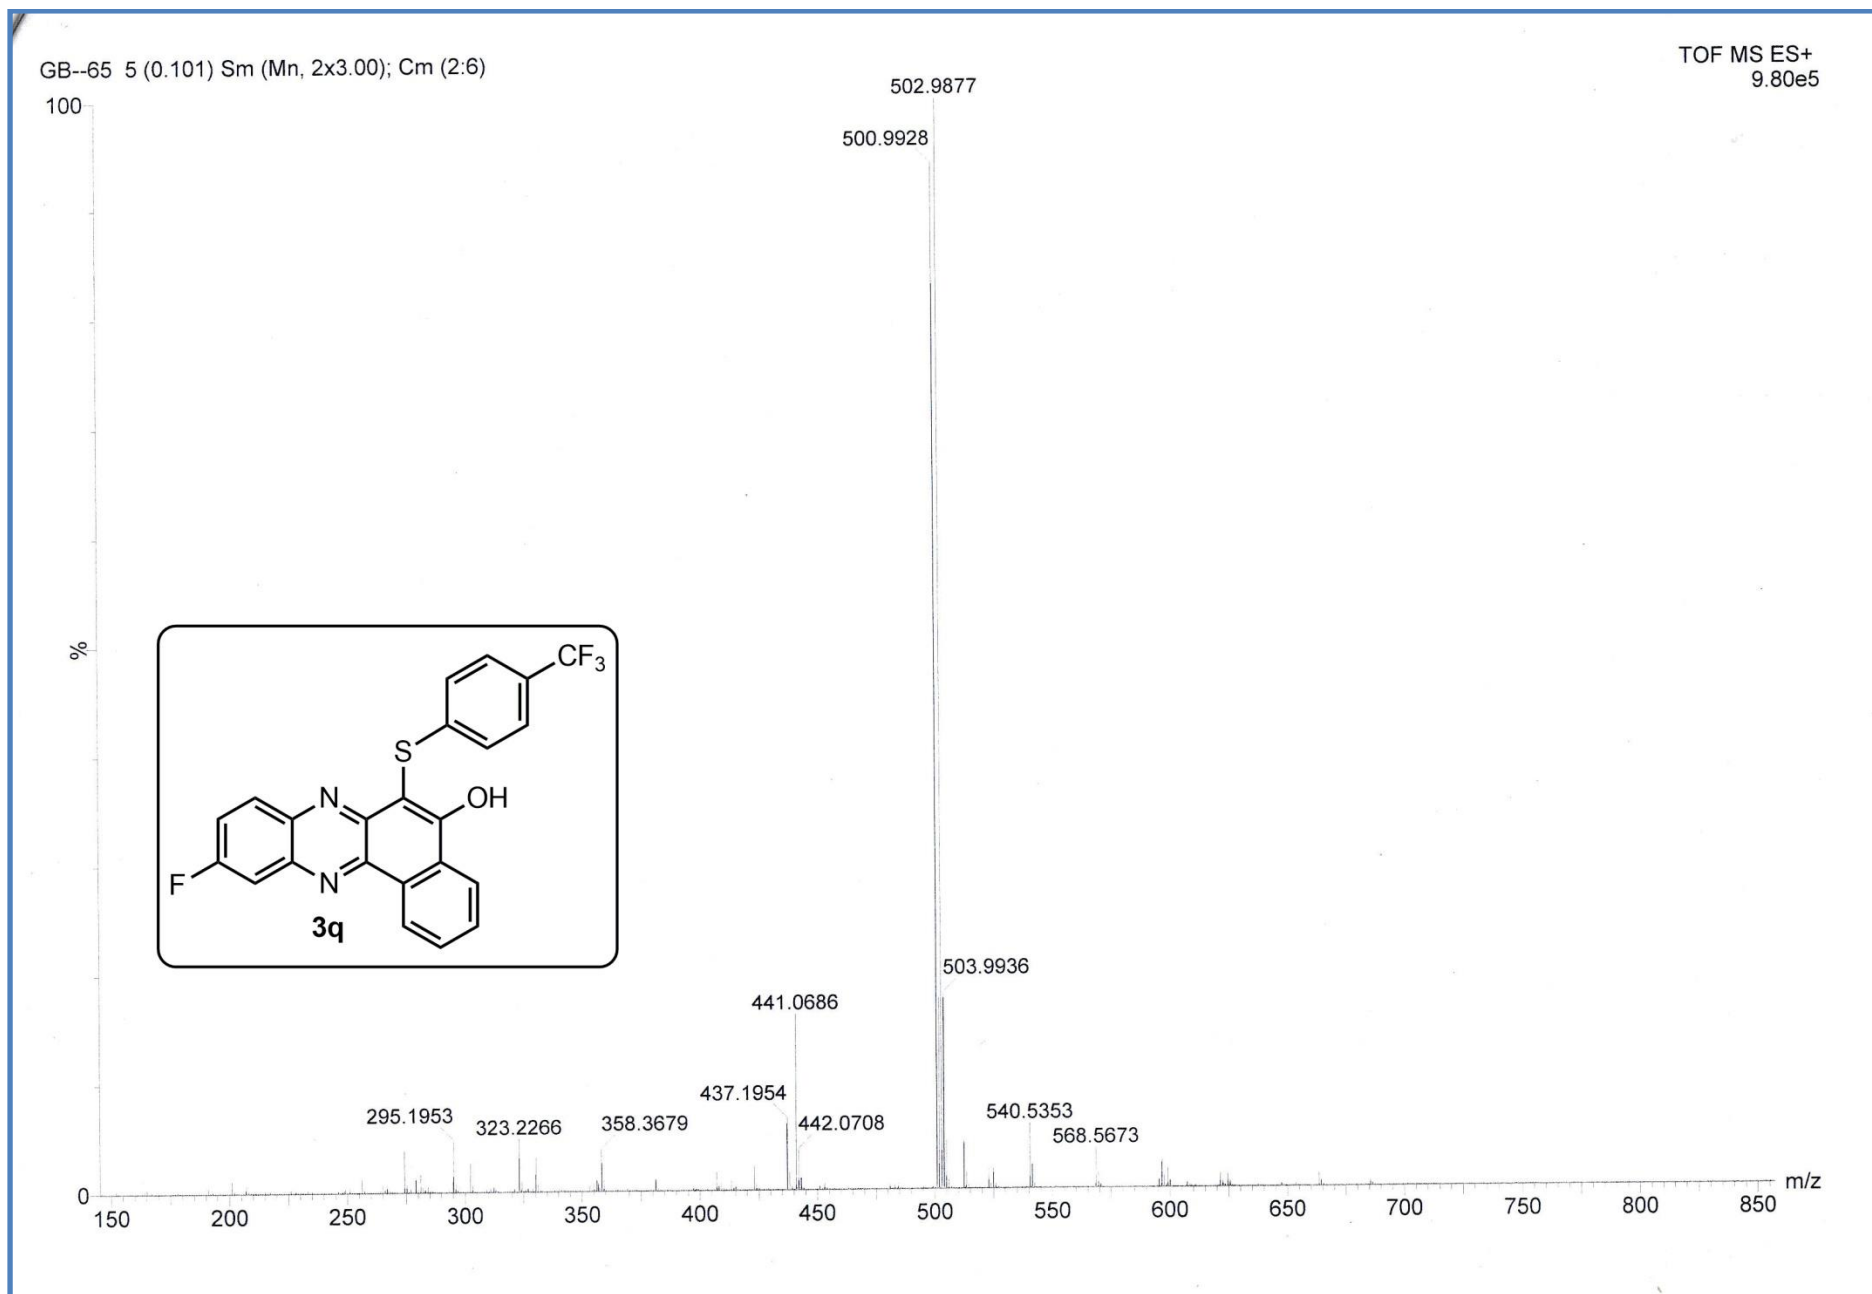

Figure S75. High-resolution Mass spectra of 10-fluoro-6-((4-(trifluoromethyl)phenyl)thio)benzo[*a*]phenazin-5-ol (**3q**)

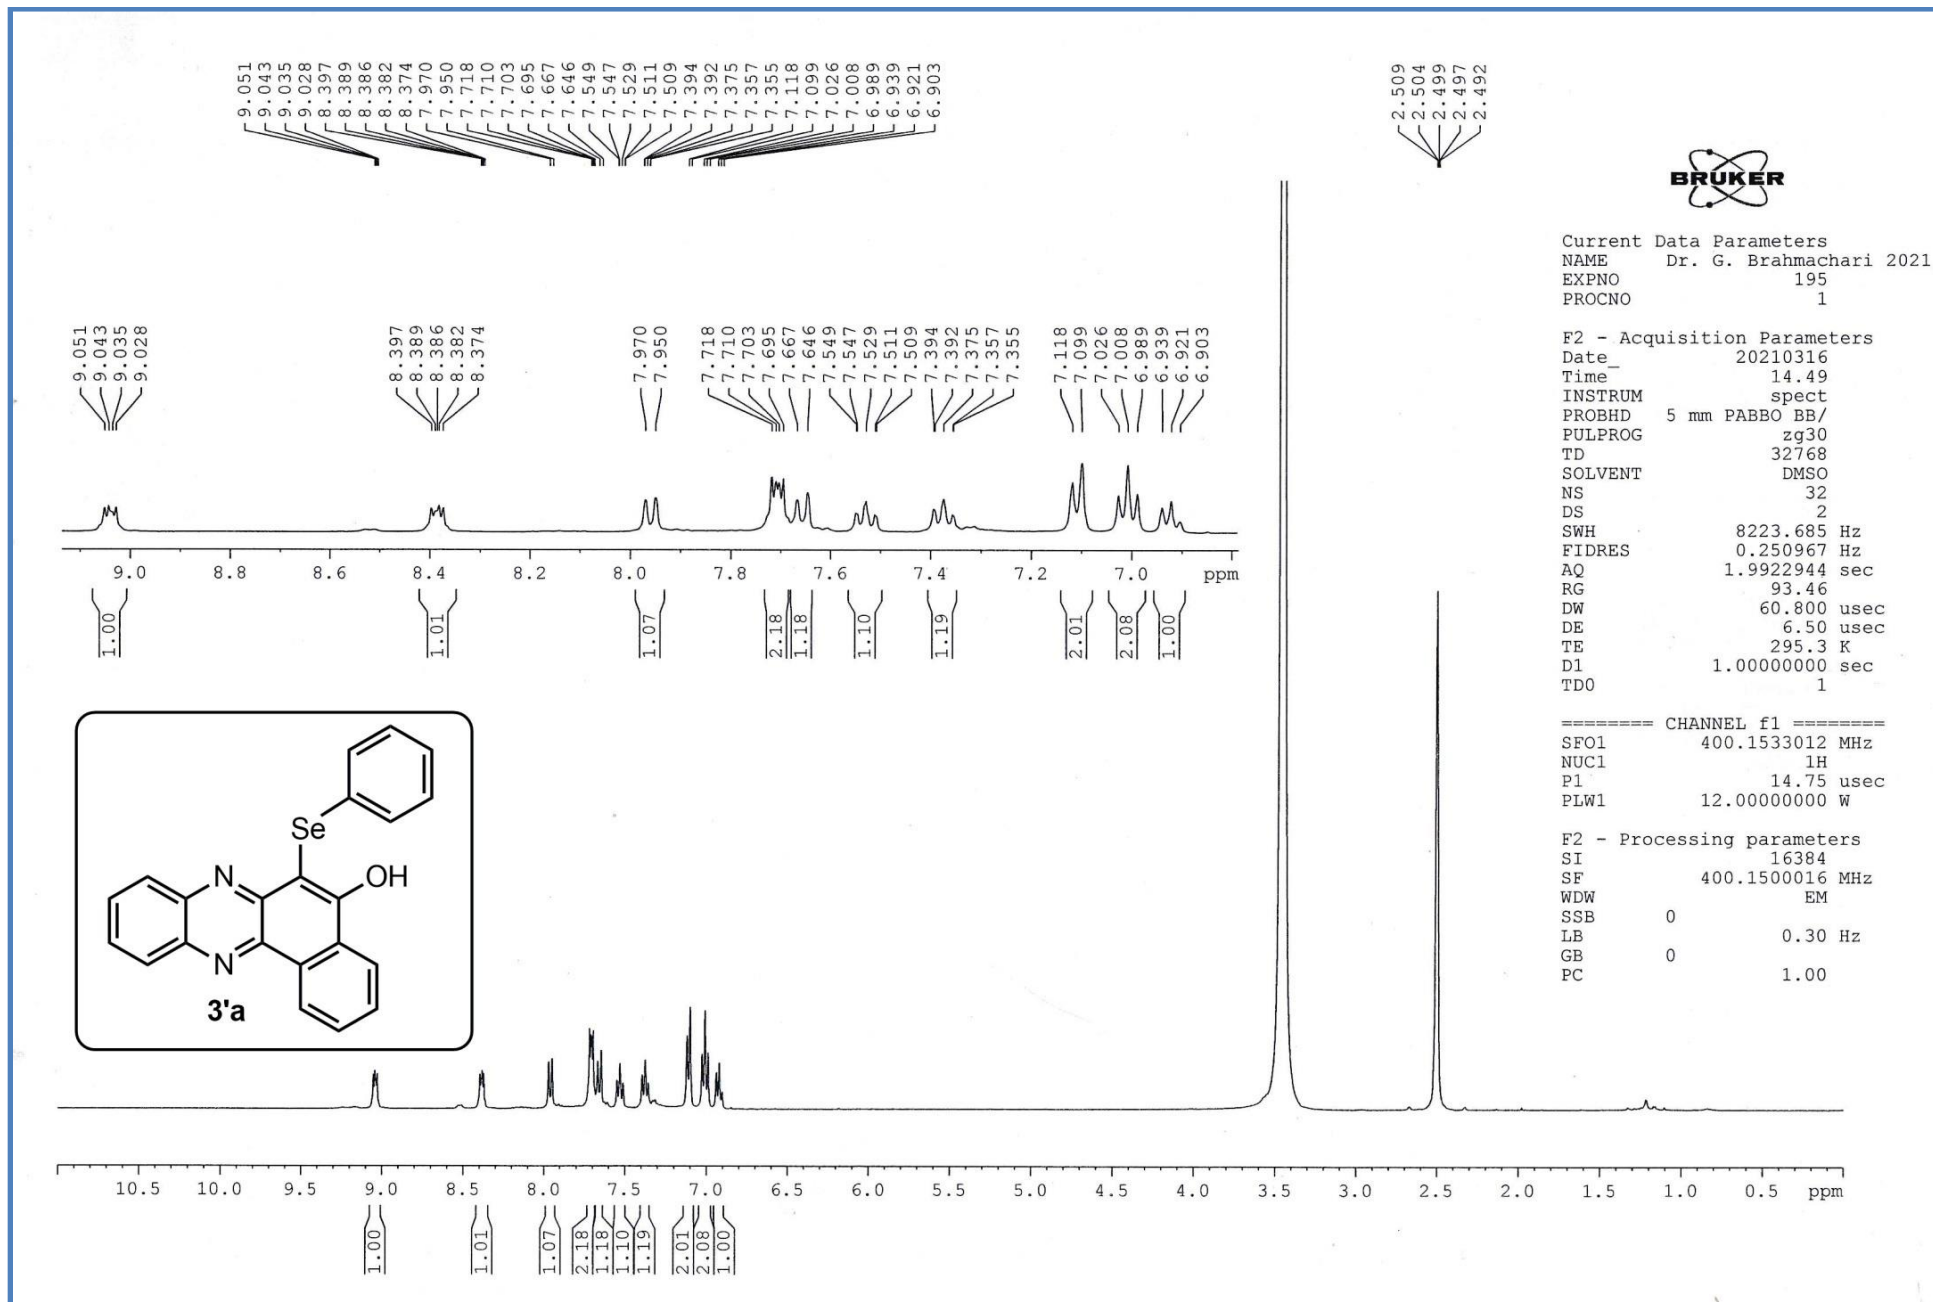

Figure S76. <sup>1</sup>H-NMR spectrum of 6-(Phenylselanyl)benzo[a]phenazin-5-ol (**3'a**)

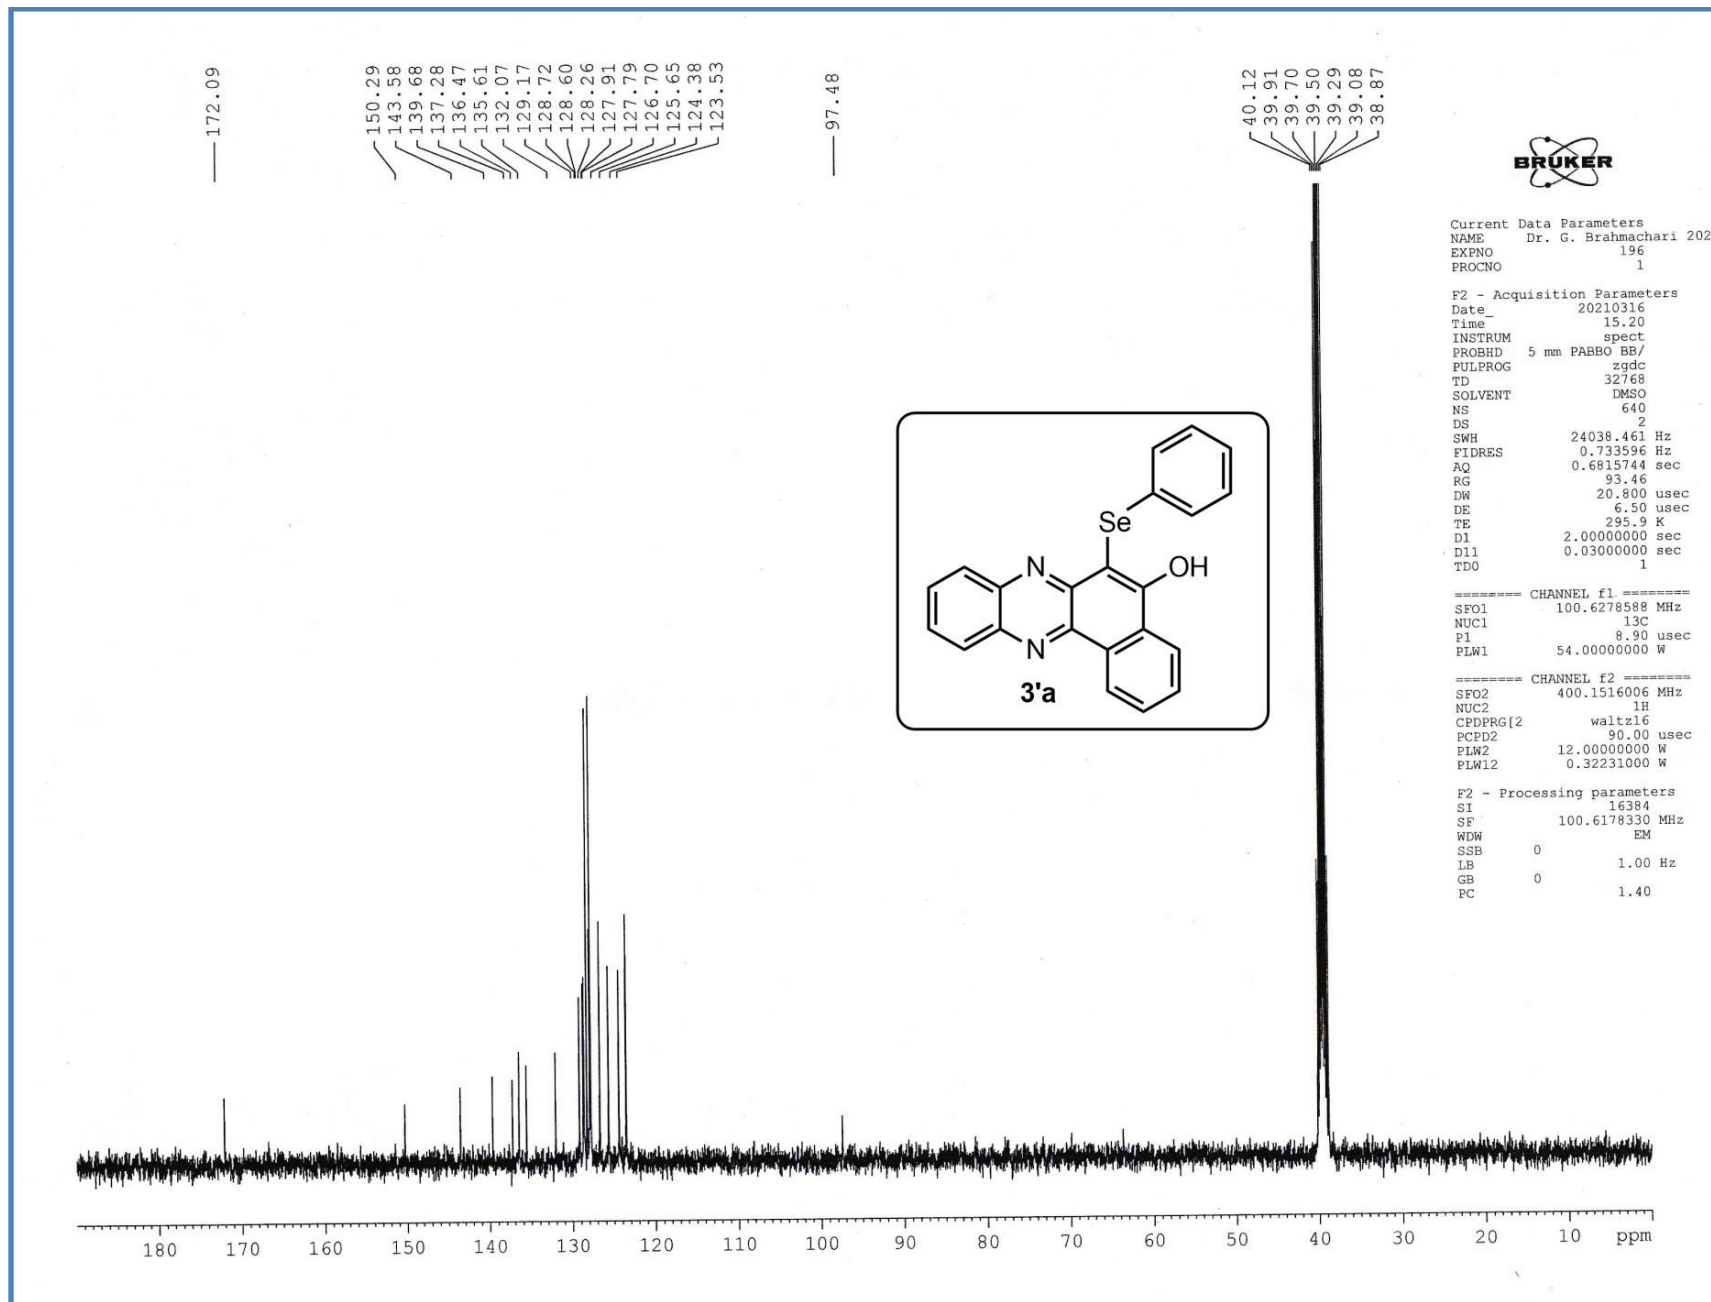

Figure S77.  $^{13}\text{C}$ -NMR spectrum of 6-(Phenylselanyl)benzo[a]phenazin-5-ol (**3'a**)

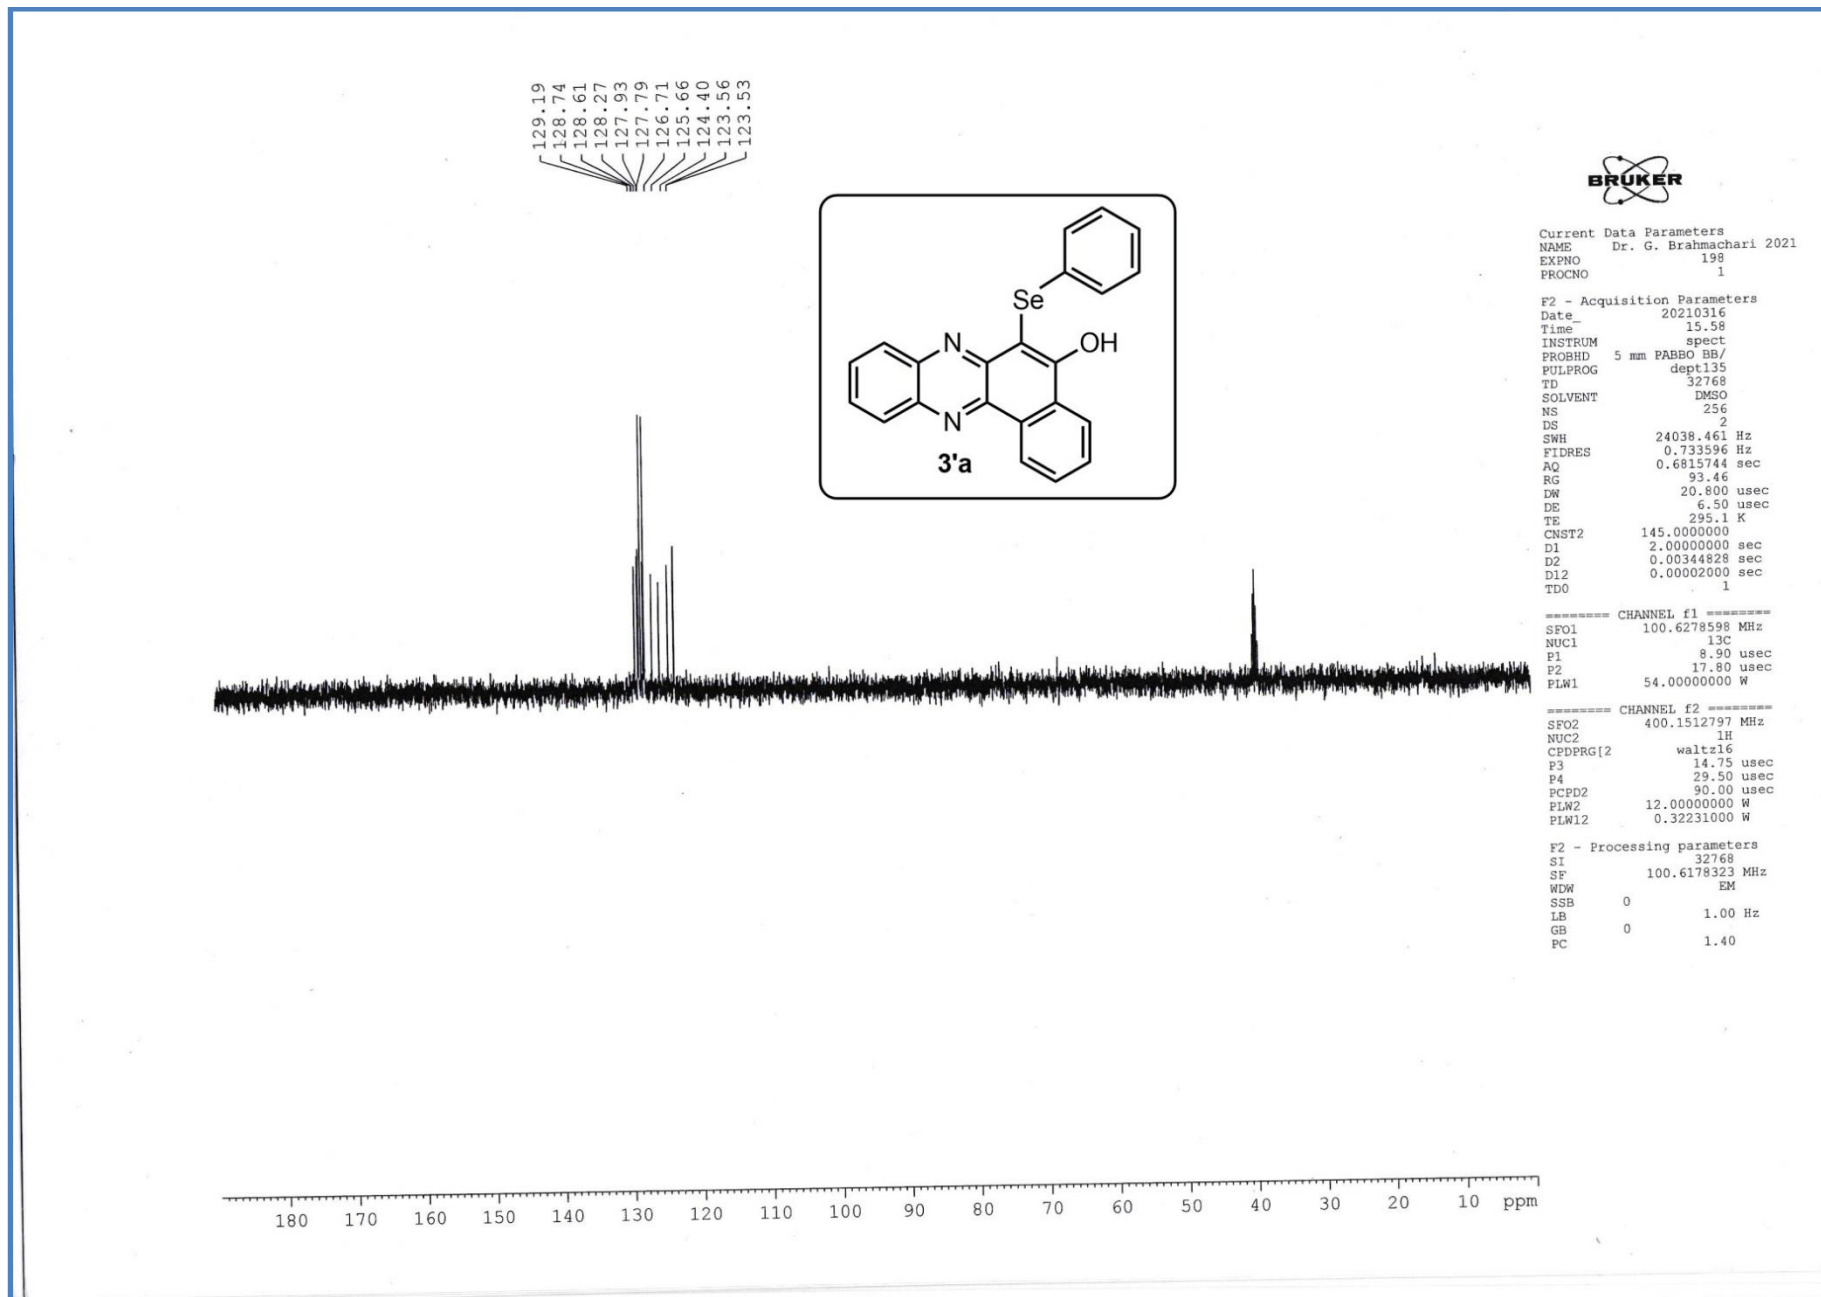

Figure S78. DEPT-135 NMR spectrum of 6-(Phenylselanyl)benzo[a]phenazin-5-ol (**3'a**)

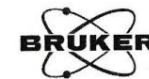

Current Data Parameters  
NAME Dr. G. Brahmachari 2021  
EXPNO 197  
PROCNO 1

F2 - Acquisition Parameters  
Date\_ 20210316  
Time 15.44  
INSTRUM spect  
PROBHD 5 mm PABBO BB/  
PULPROG zg  
TD 32768  
SOLVENT DMSO  
NS 512  
DS 4  
SWH 38265.305 Hz  
FIDRES 1.167764 Hz  
AQ 0.4281685 sec  
RG 93.46  
DW 13.067 usec  
DE 6.50 usec  
TE 294.9 K  
D1 2.00000000 sec  
TD0 1

===== CHANNEL f1 =====  
SFO1 76.3222905 MHz  
NUC1 77Se  
P1 9.00 usec  
PLW1 60.00000000 W

F2 - Processing parameters  
SI 16384  
SF 76.3146590 MHz  
WDW EM  
SSB 0  
LB 1.00 Hz  
GB 0  
PC 1.40

— 236.55

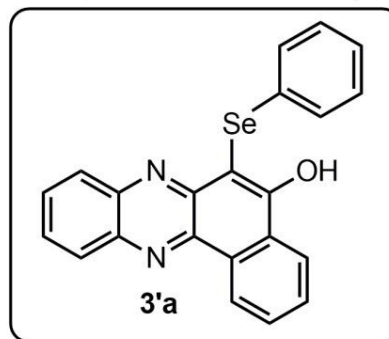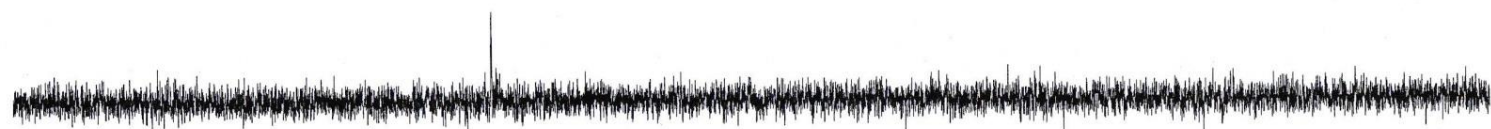

300

250

200

150

100

50

ppm

Figure S79. <sup>77</sup>Se-NMR spectrum of 6-(Phenylselanyl)benzo[a]phenazin-5-ol (**3'a**)

## Display Report

### Analysis Info

Analysis Name D:\Data\User data\2019\JUNE\GB\_NH\_5\_1.d  
Method Tune\_pos\_Standard.m  
Sample Name GB\_NH\_5\_1  
Comment

Acquisition Date 6/21/2019 12:52:52 PM

Operator IISER Kalyani  
Instrument maXis impact 8282001.00127

### Acquisition Parameter

|             |          |                      |          |                  |           |
|-------------|----------|----------------------|----------|------------------|-----------|
| Source Type | ESI      | Ion Polarity         | Positive | Set Nebulizer    | 0.3 Bar   |
| Focus       | Active   | Set Capillary        | 3400 V   | Set Dry Heater   | 200 °C    |
| Scan Begin  | 50 m/z   | Set End Plate Offset | -500 V   | Set Dry Gas      | 4.0 l/min |
| Scan End    | 1000 m/z | Set Charging Voltage | 2000 V   | Set Divert Valve | Source    |
|             |          | Set Corona           | 0 nA     | Set APCI Heater  | 0 °C      |

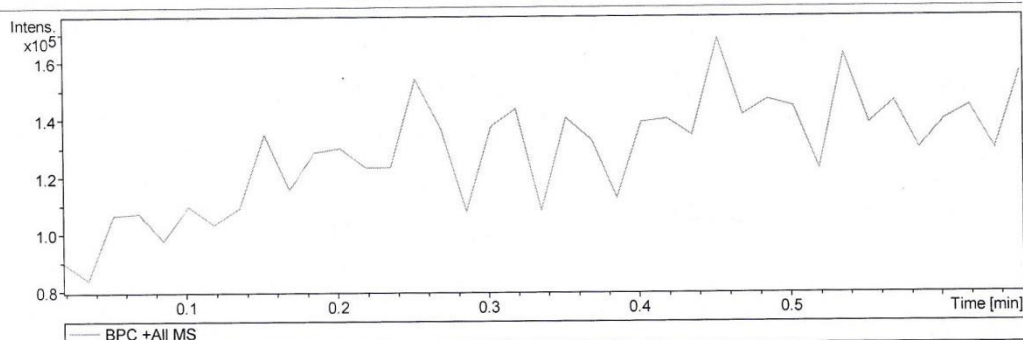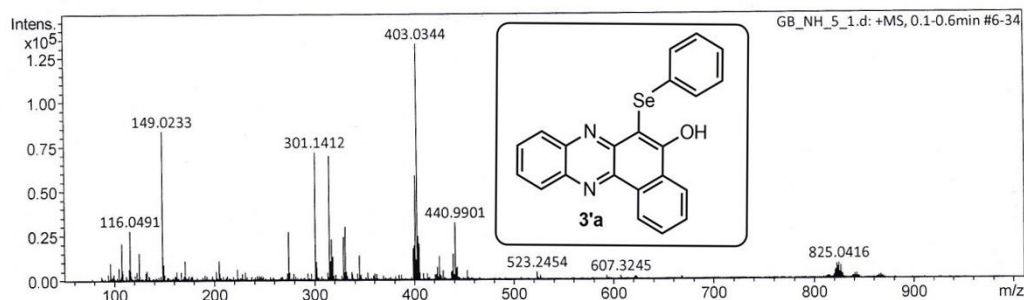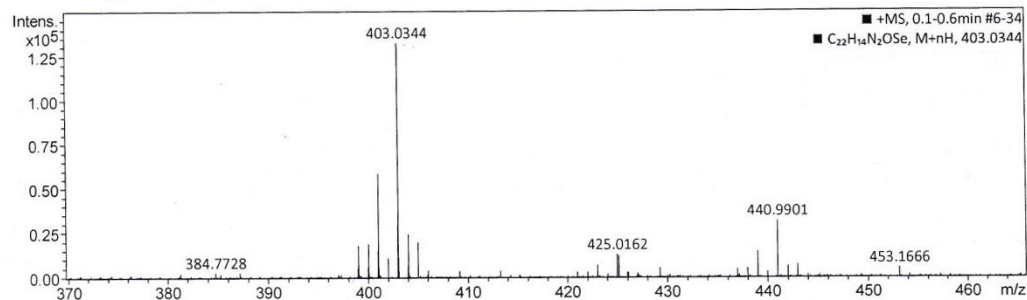

GB\_NH\_5\_1.d

Bruker Compass DataAnalysis 4.1

printed: 6/21/2019 1:01:26 PM

by: IISER Kalyani

Page 1 of 1

Figure S80. High-resolution Mass spectra of 6-(Phenylselanyl)benzo[a]phenazin-5-ol (**3'a**)

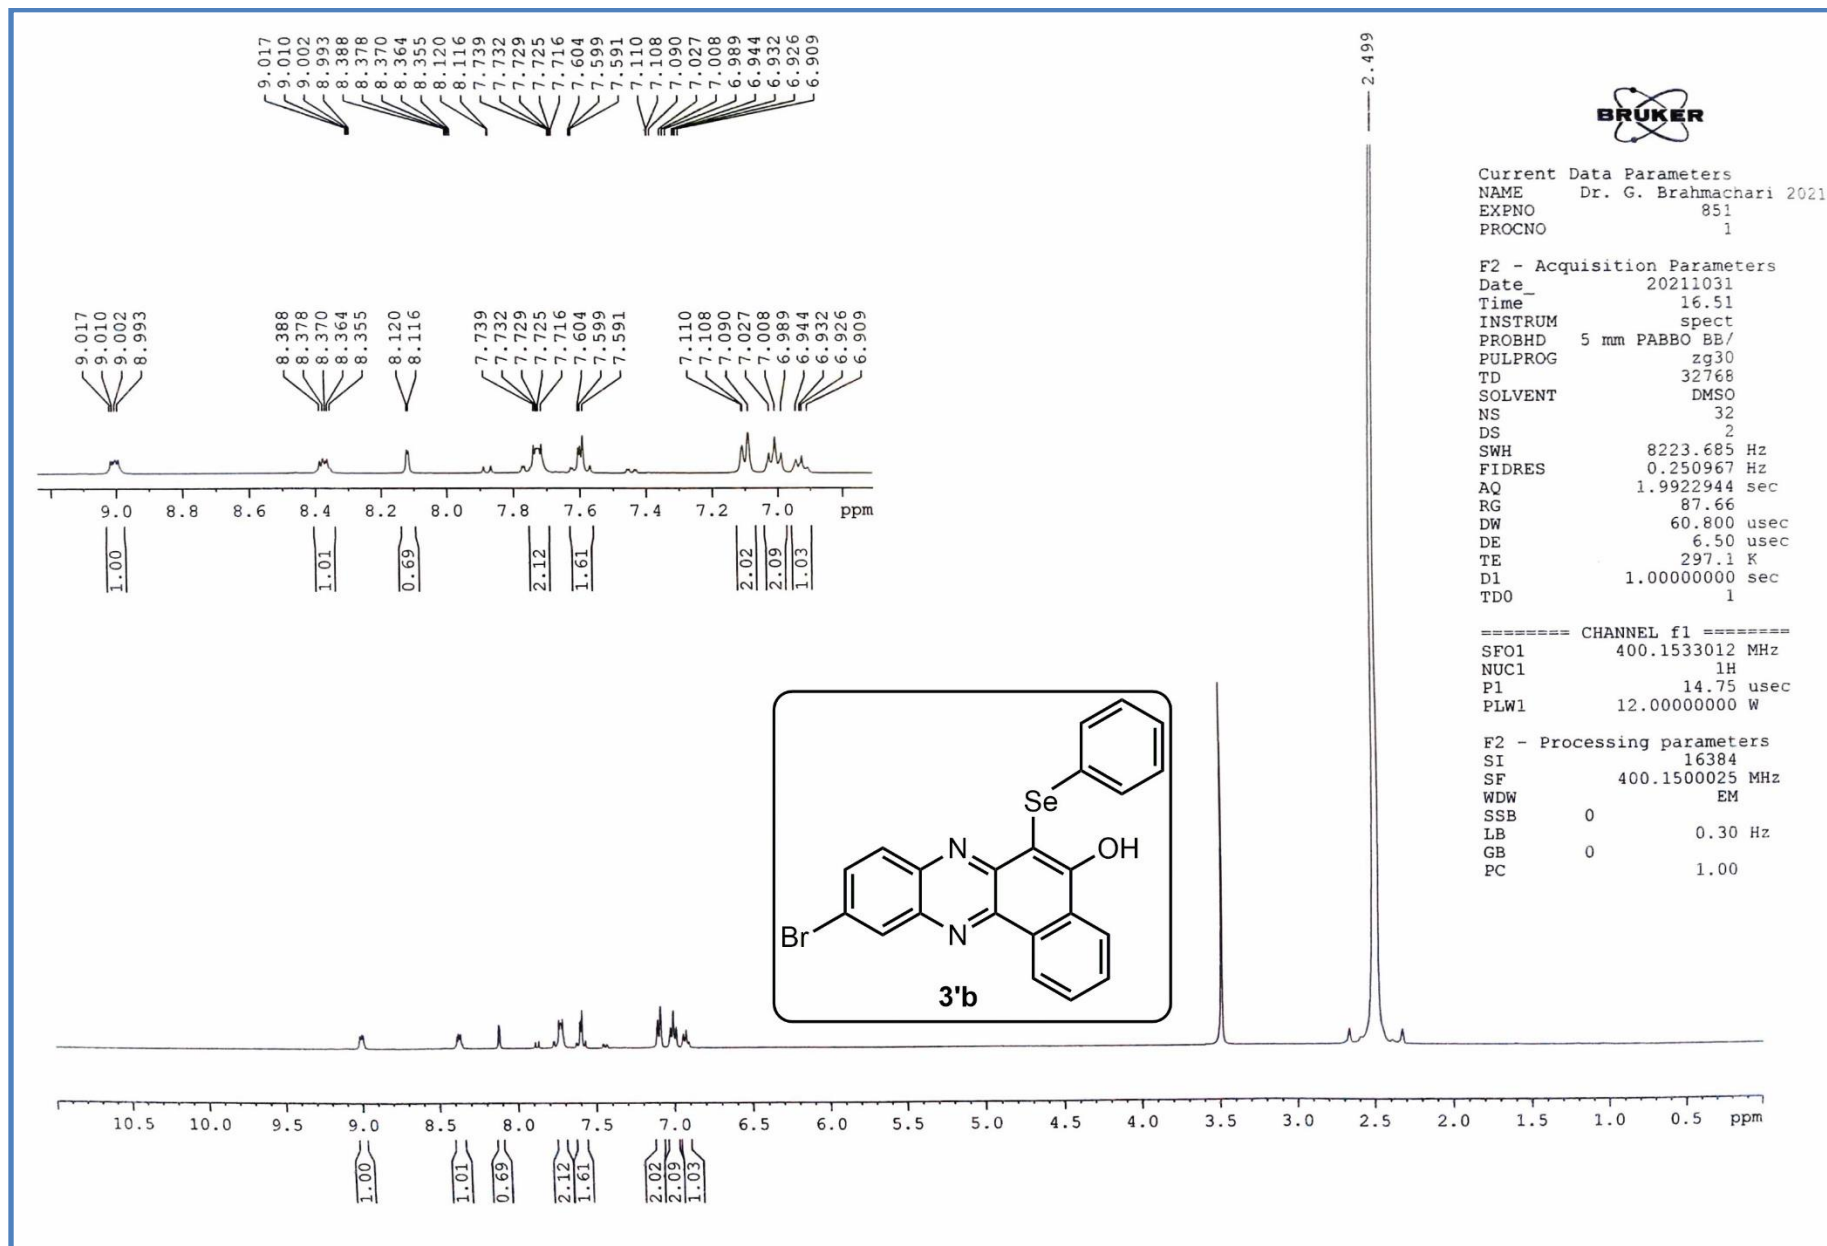

Figure S81. <sup>1</sup>H-NMR spectrum of 10-bromo-6-(phenylselanyl)benzo[a]phenazin-5-ol (**3'b**)



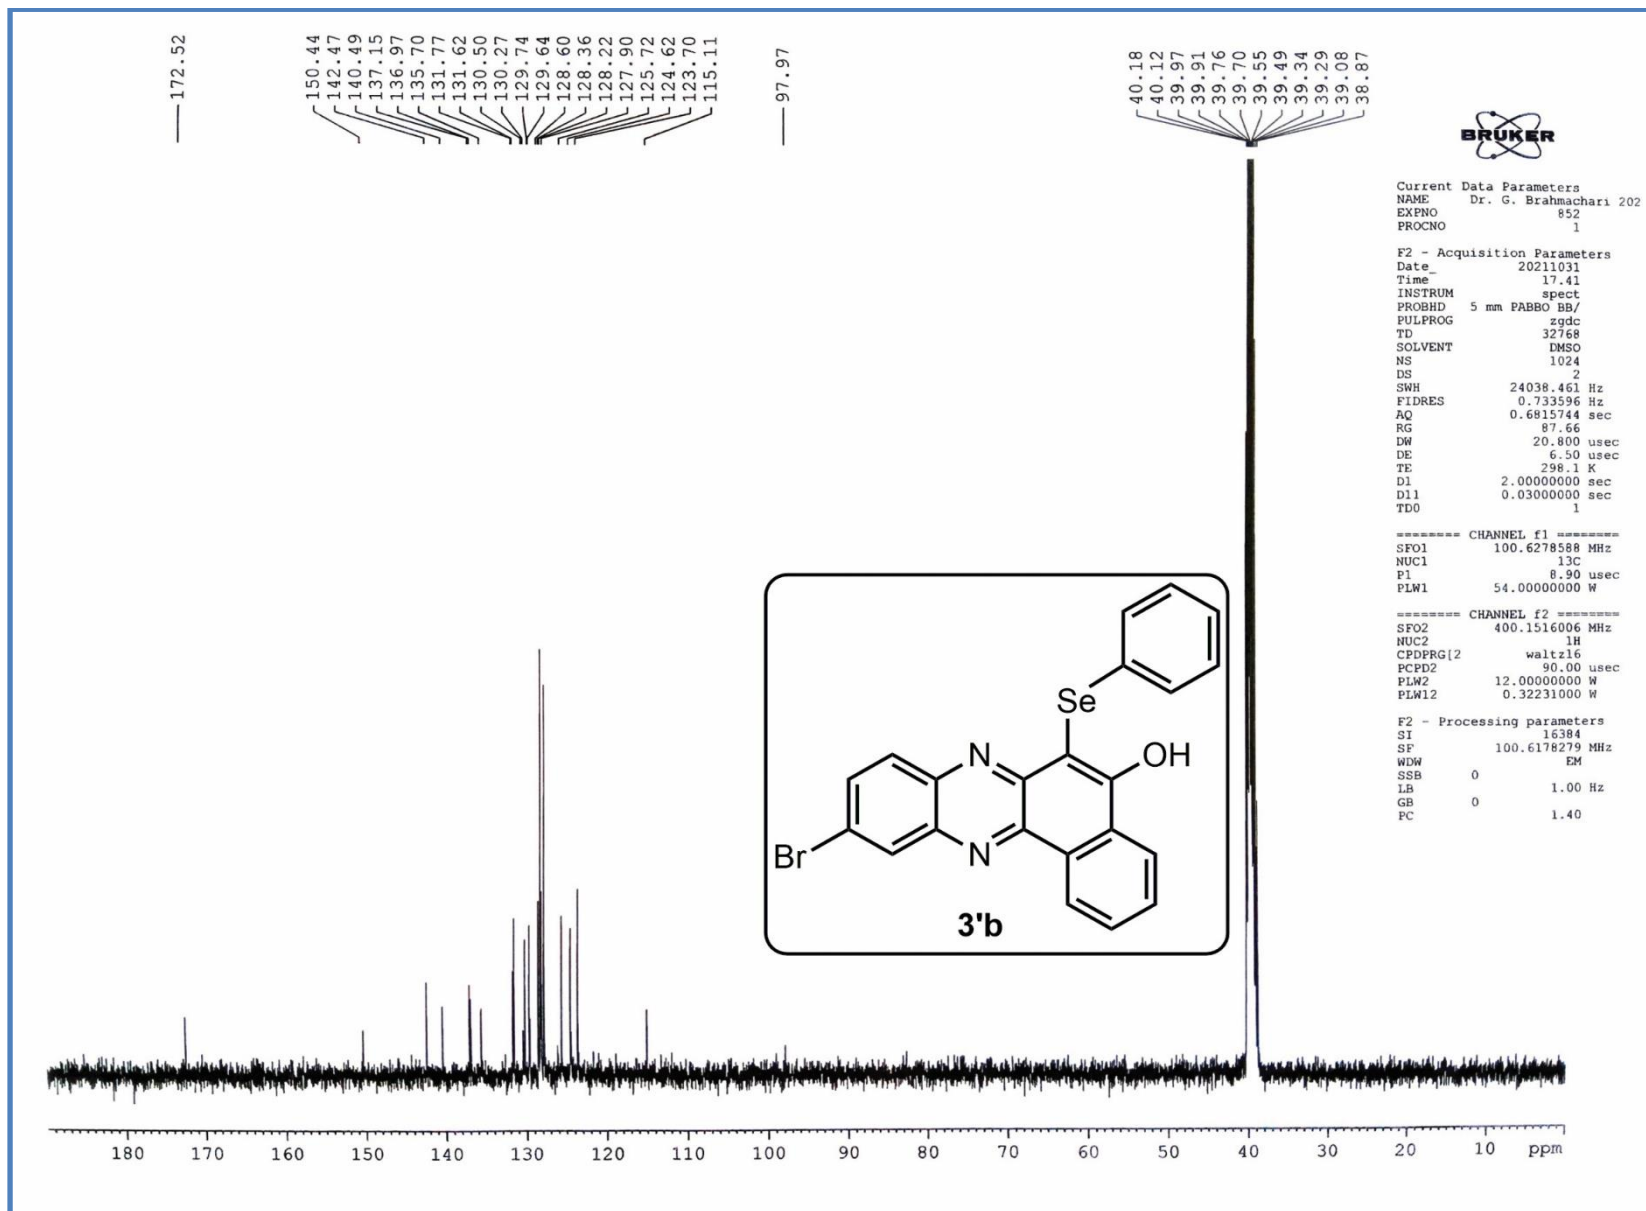

Figure S82. <sup>13</sup>C-NMR spectrum of 10-bromo-6-(phenylselanyl)benzo[*a*]phenazin-5-ol (**3'b**)

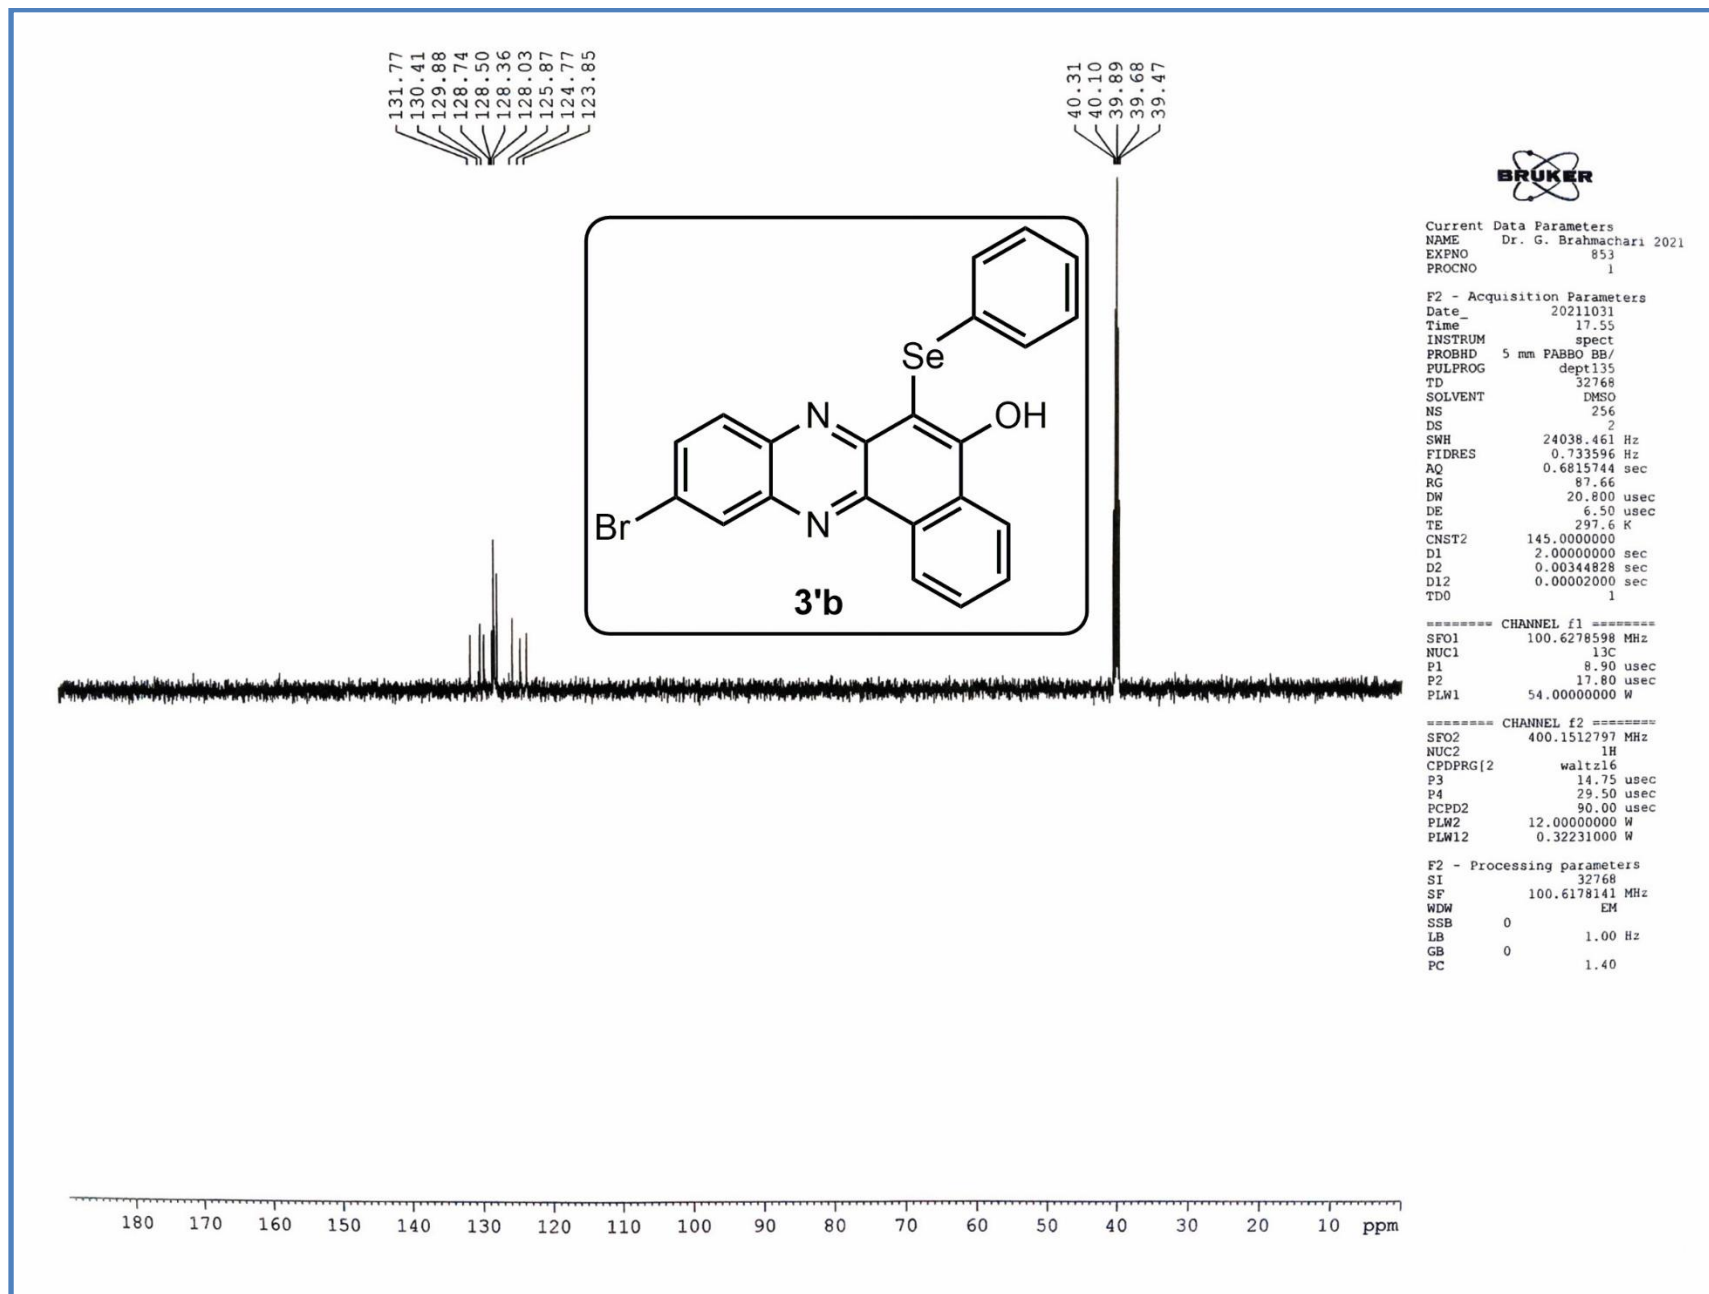

Figure S83. DEPT-135 NMR spectrum of 10-bromo-6-(phenylselanyl)benzo[*a*]phenazin-5-ol (**3'b**)

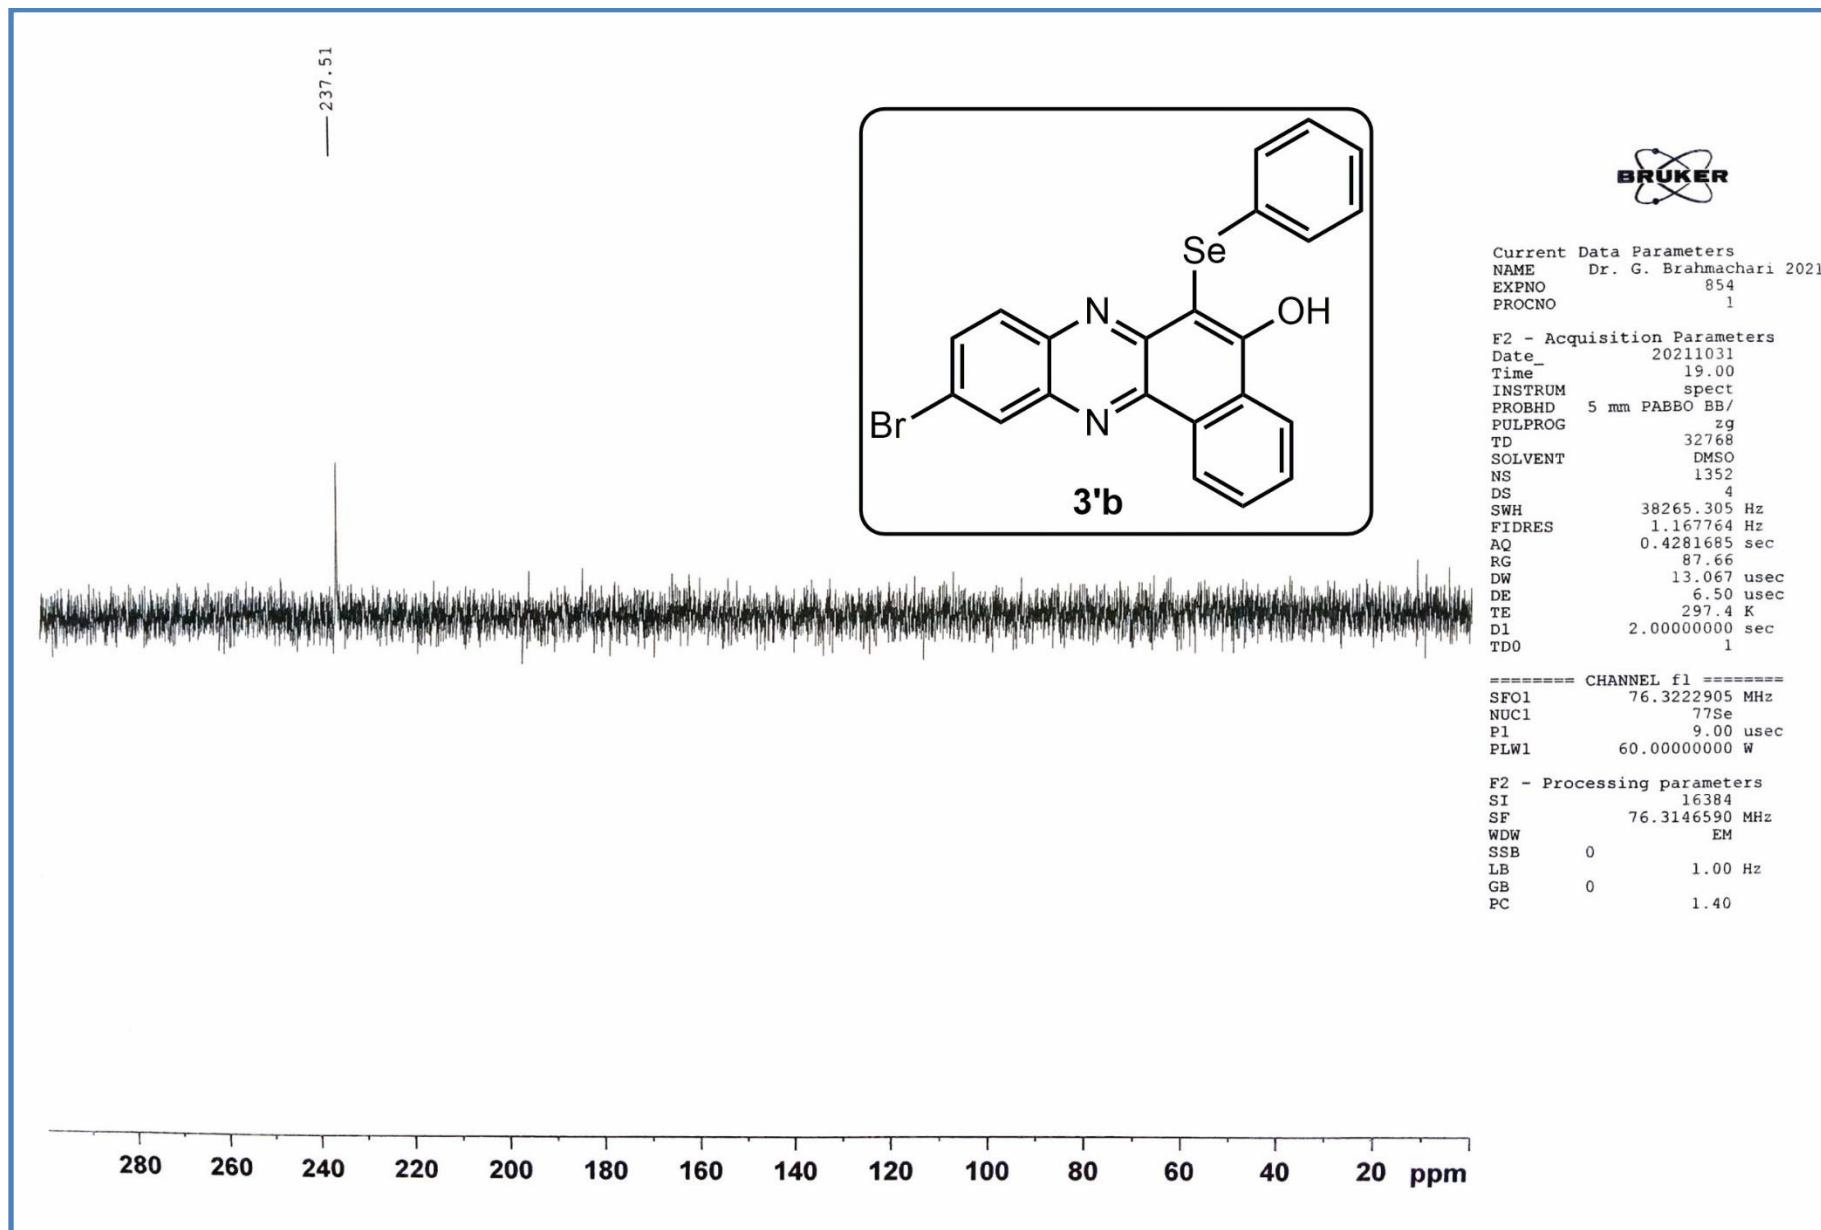

Figure S84.  $^{77}\text{Se}$  NMR spectrum of 10-bromo-6-(phenylselanyl)benzo[*a*]phenazin-5-ol (**3'b**)

## Display Report

### Analysis Info

Analysis Name D:\Data\User data\2019\OCT\GB-40.d  
Method Tune\_pos\_Mid.m  
Sample Name GB-40  
Comment

Acquisition Date 10/28/2019 11:40:58 AM  
Operator IISER Kalyani  
Instrument maXis impact 8282001.00127

### Acquisition Parameter

|             |          |                      |          |                  |           |
|-------------|----------|----------------------|----------|------------------|-----------|
| Source Type | ESI      | Ion Polarity         | Positive | Set Nebulizer    | 0.4 Bar   |
| Focus       | Active   | Set Capillary        | 3400 V   | Set Dry Heater   | 200 °C    |
| Scan Begin  | 50 m/z   | Set End Plate Offset | -500 V   | Set Dry Gas      | 4.0 l/min |
| Scan End    | 3000 m/z | Set Charging Voltage | 2000 V   | Set Divert Valve | Source    |
|             |          | Set Corona           | 0 nA     | Set APCI Heater  | 0 °C      |

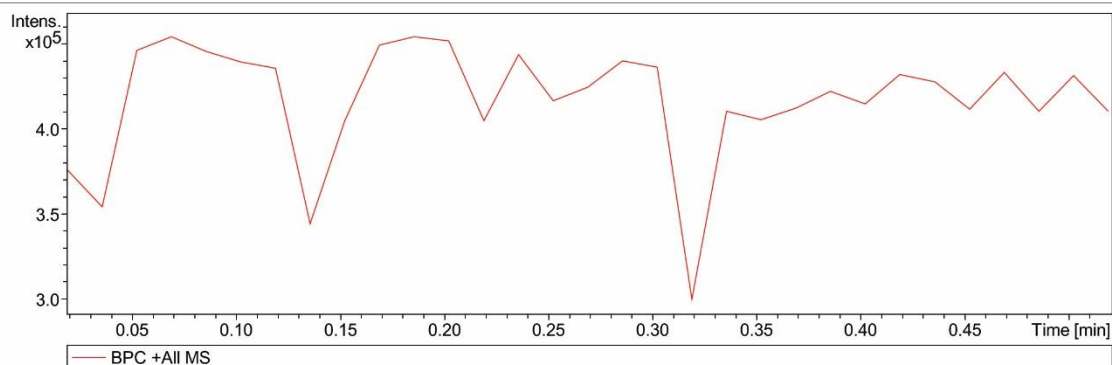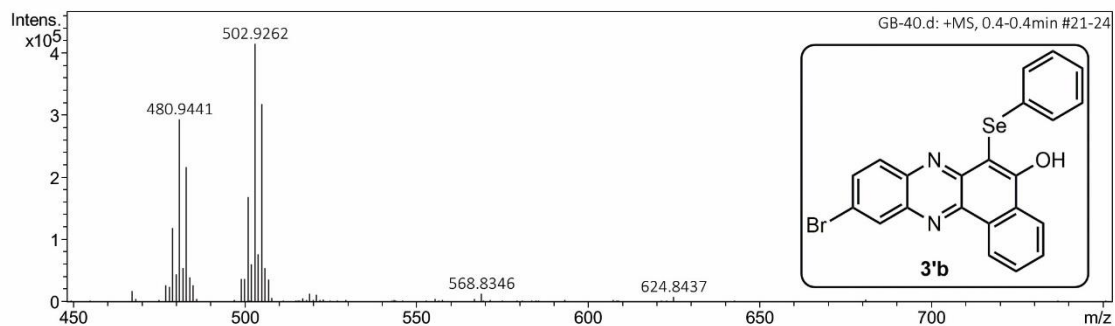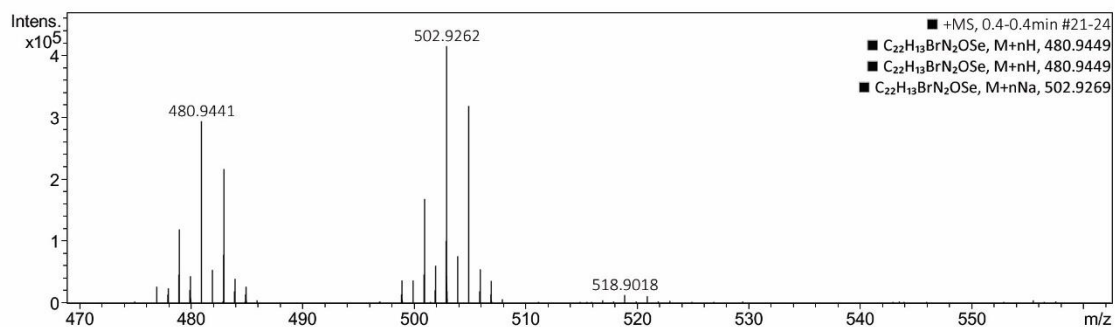

GB-40.d

Bruker Compass DataAnalysis 4.1

printed: 10/28/2019 11:45:18 AM

by: IISER Kalyani

Page 1 of 1

Figure S85. HRMS NMR spectrum of 10-bromo-6-(phenylselanyl)benzo[*a*]phenazin-5-ol (**3'b**)

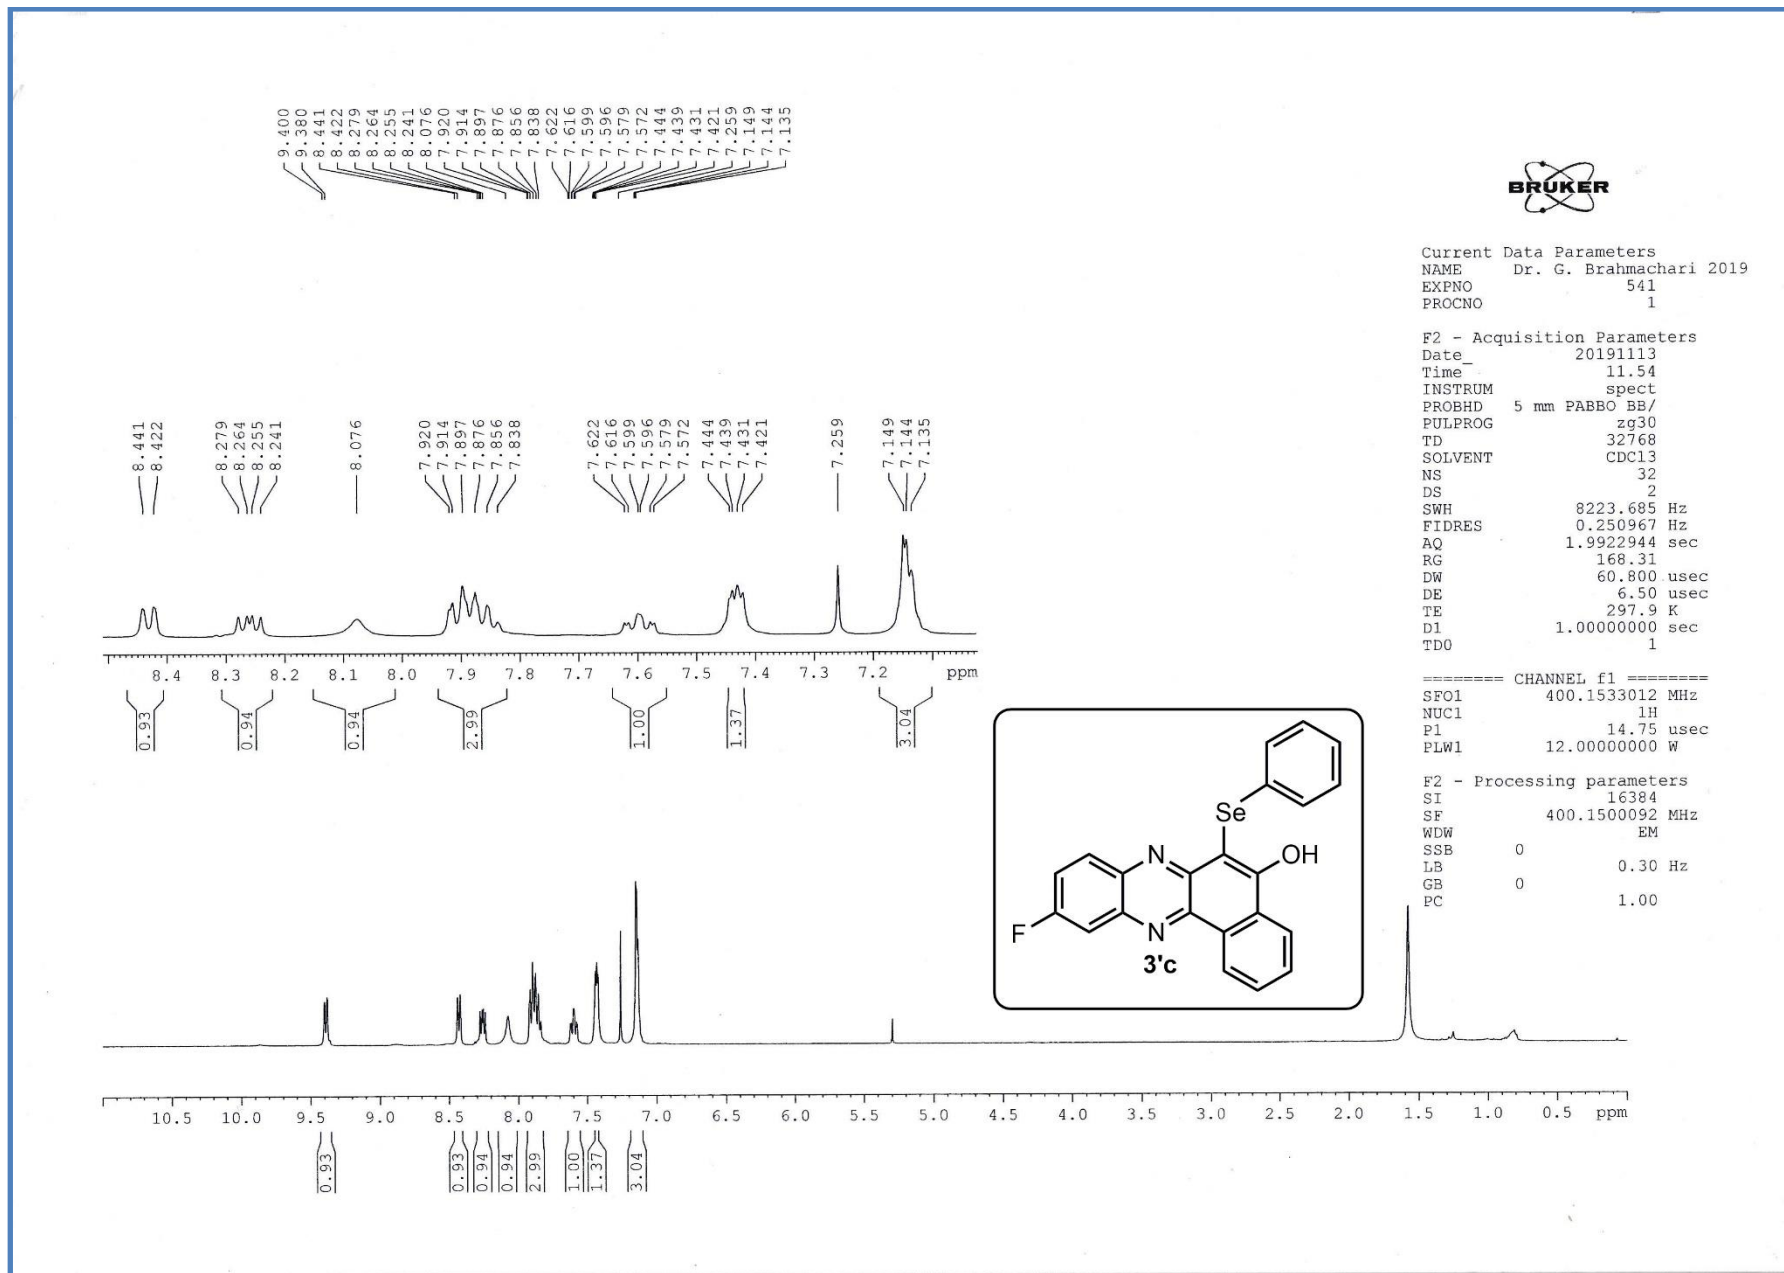

Figure S86. <sup>1</sup>H-NMR spectrum of 10-fluoro-6-(phenylselanyl)benzo[*a*]phenazin-5-ol (**3'c**)

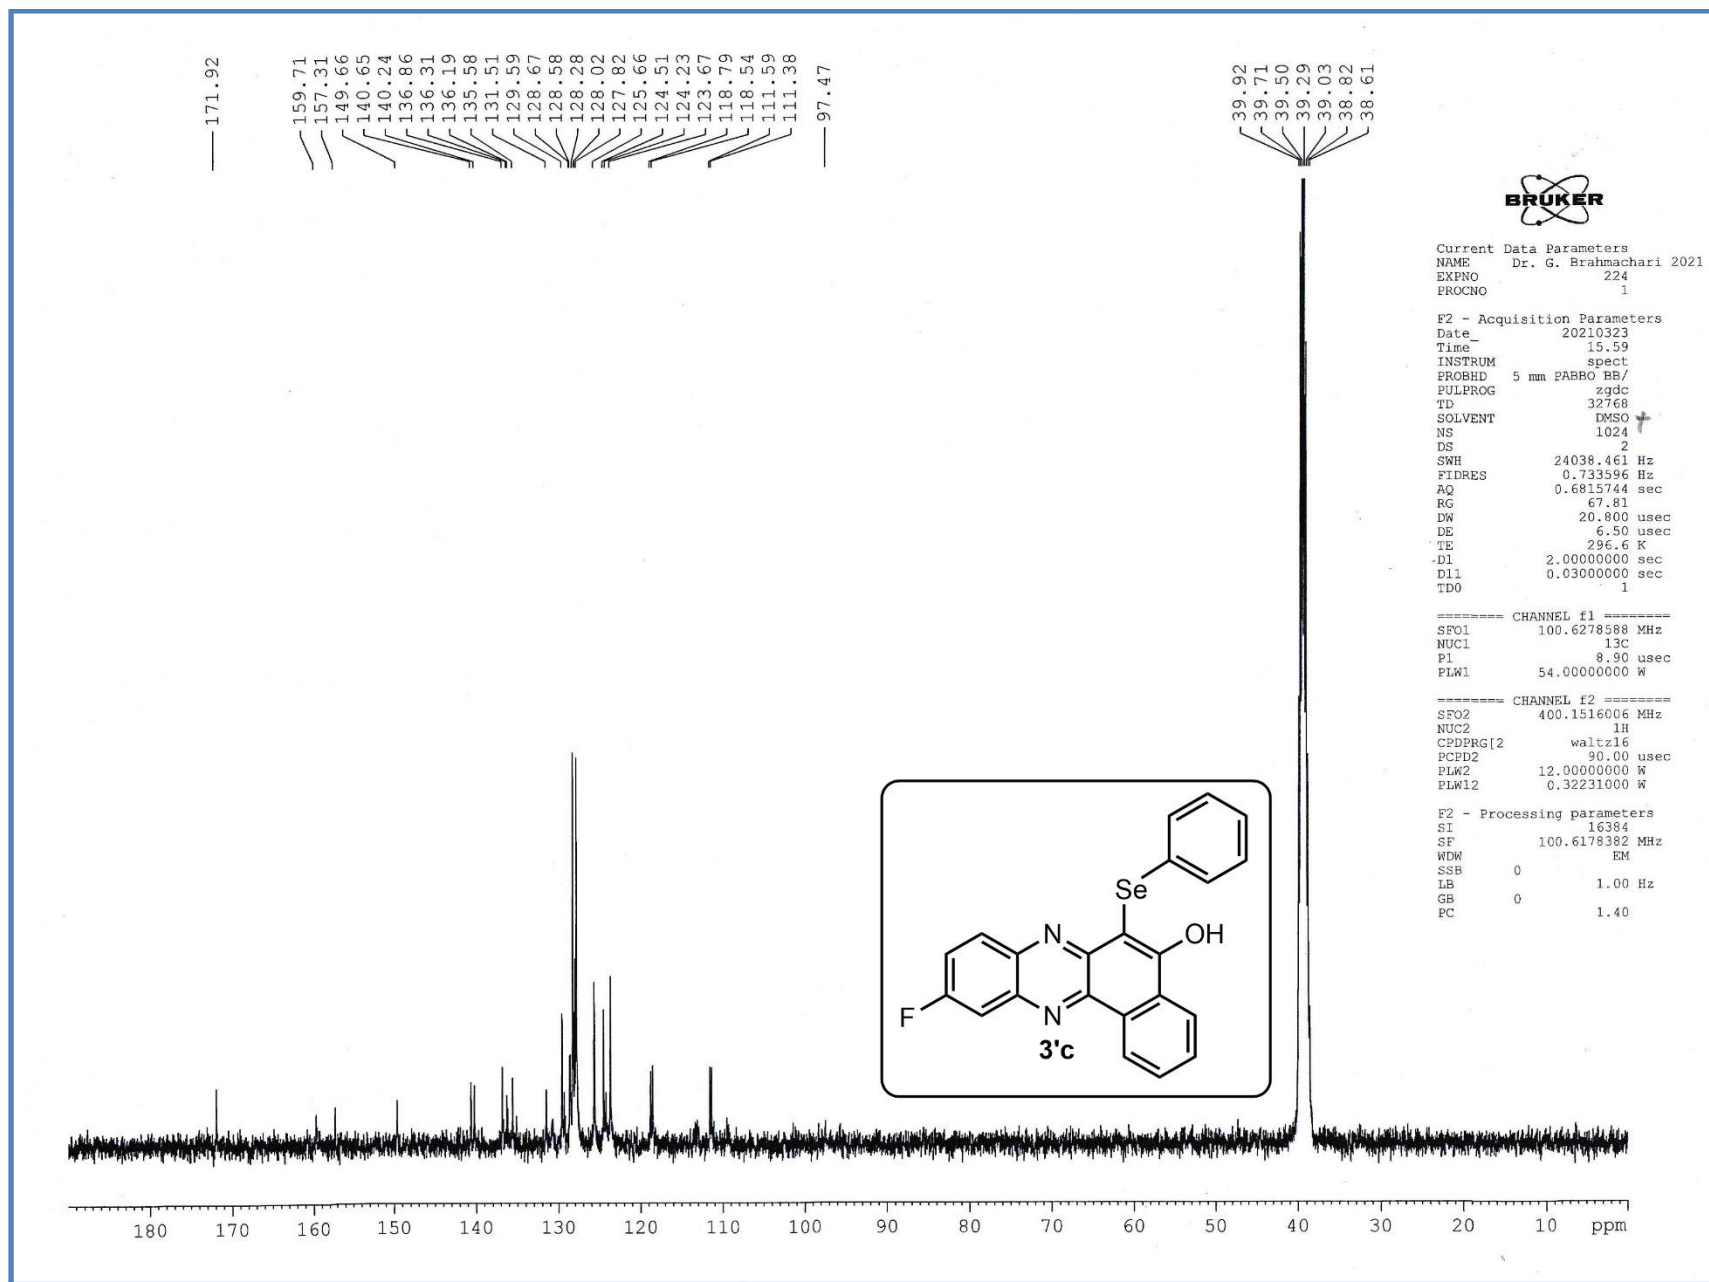

Figure S87.  $^{13}\text{C}$ -NMR spectrum of 10-fluoro-6-(phenylselanyl)benzo[*a*]phenazin-5-ol (**3c**)

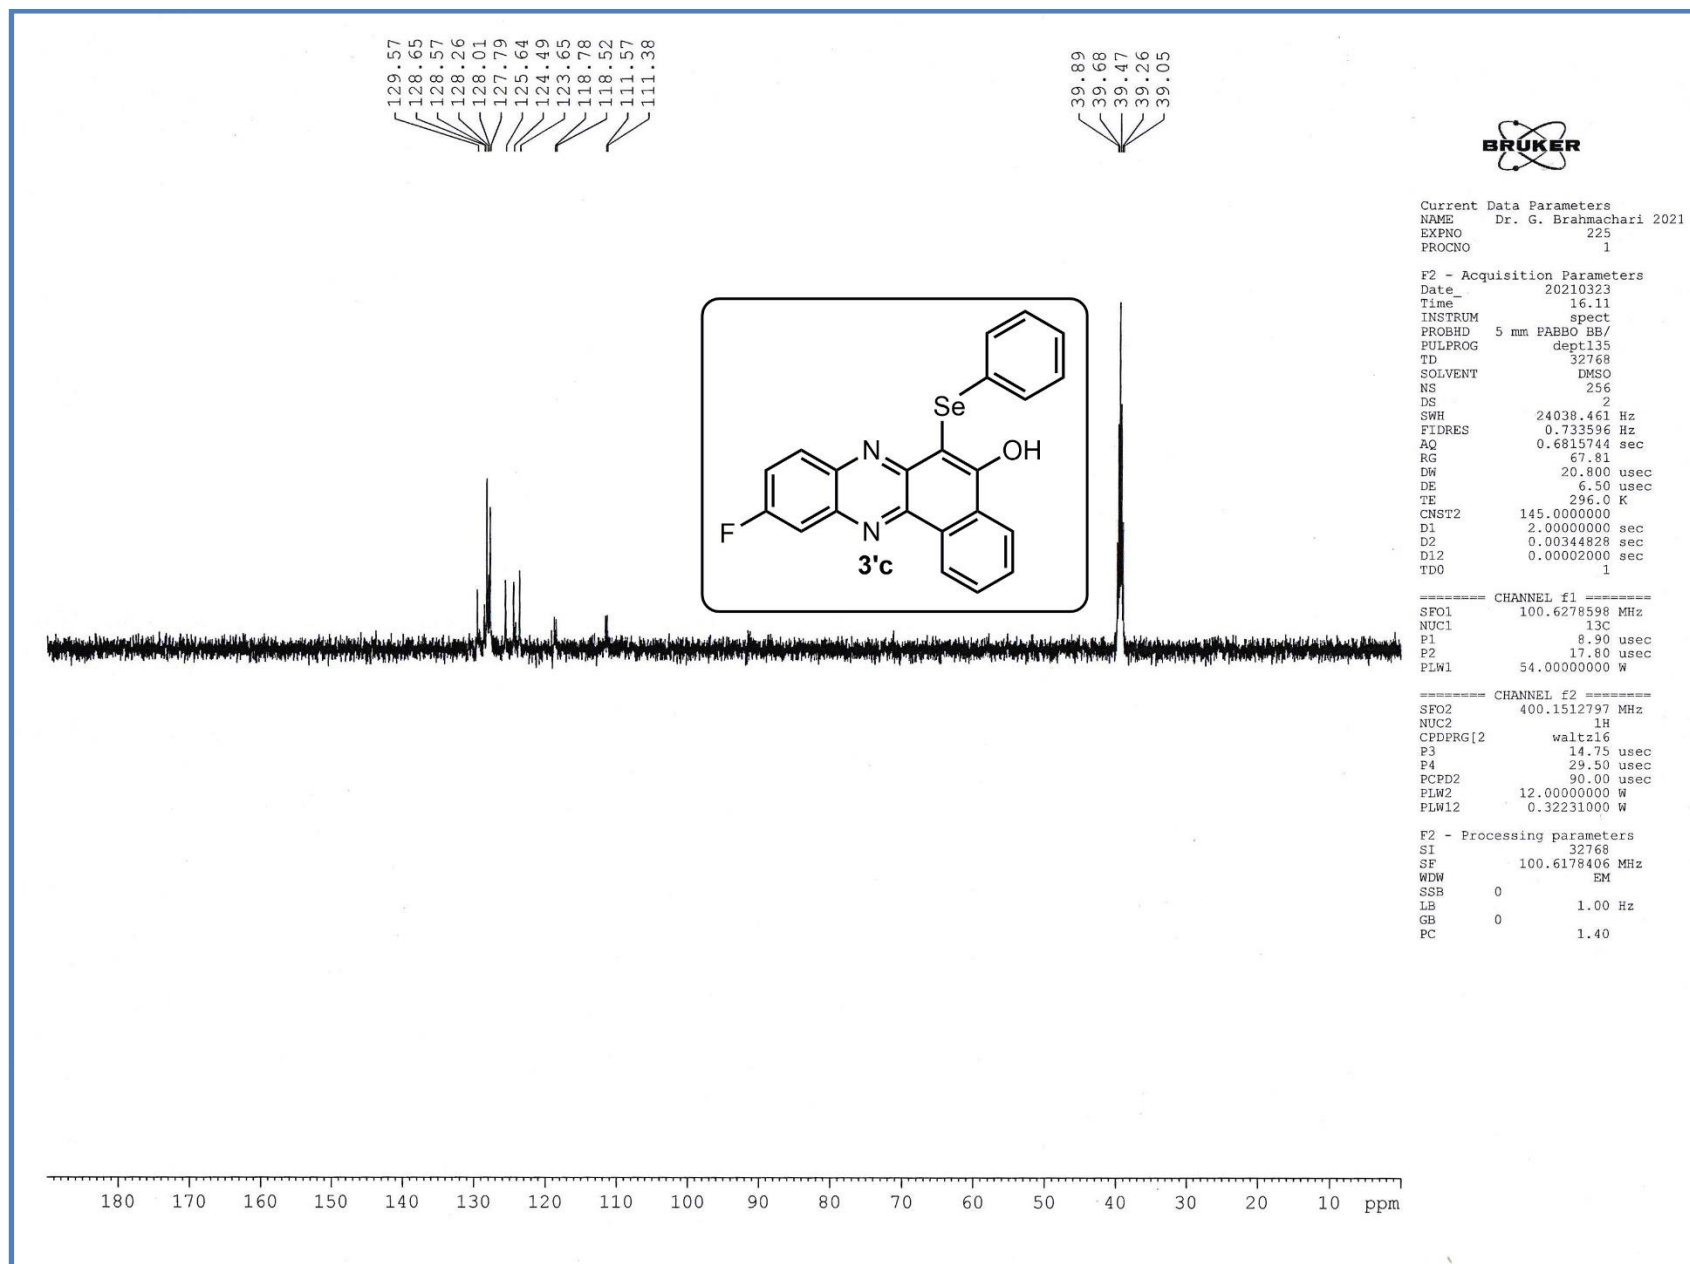

Figure S88. DEPT-135 NMR spectrum of 10-fluoro-6-(phenylselanyl)benzo[a]phenazin-5-ol (**3'c**)

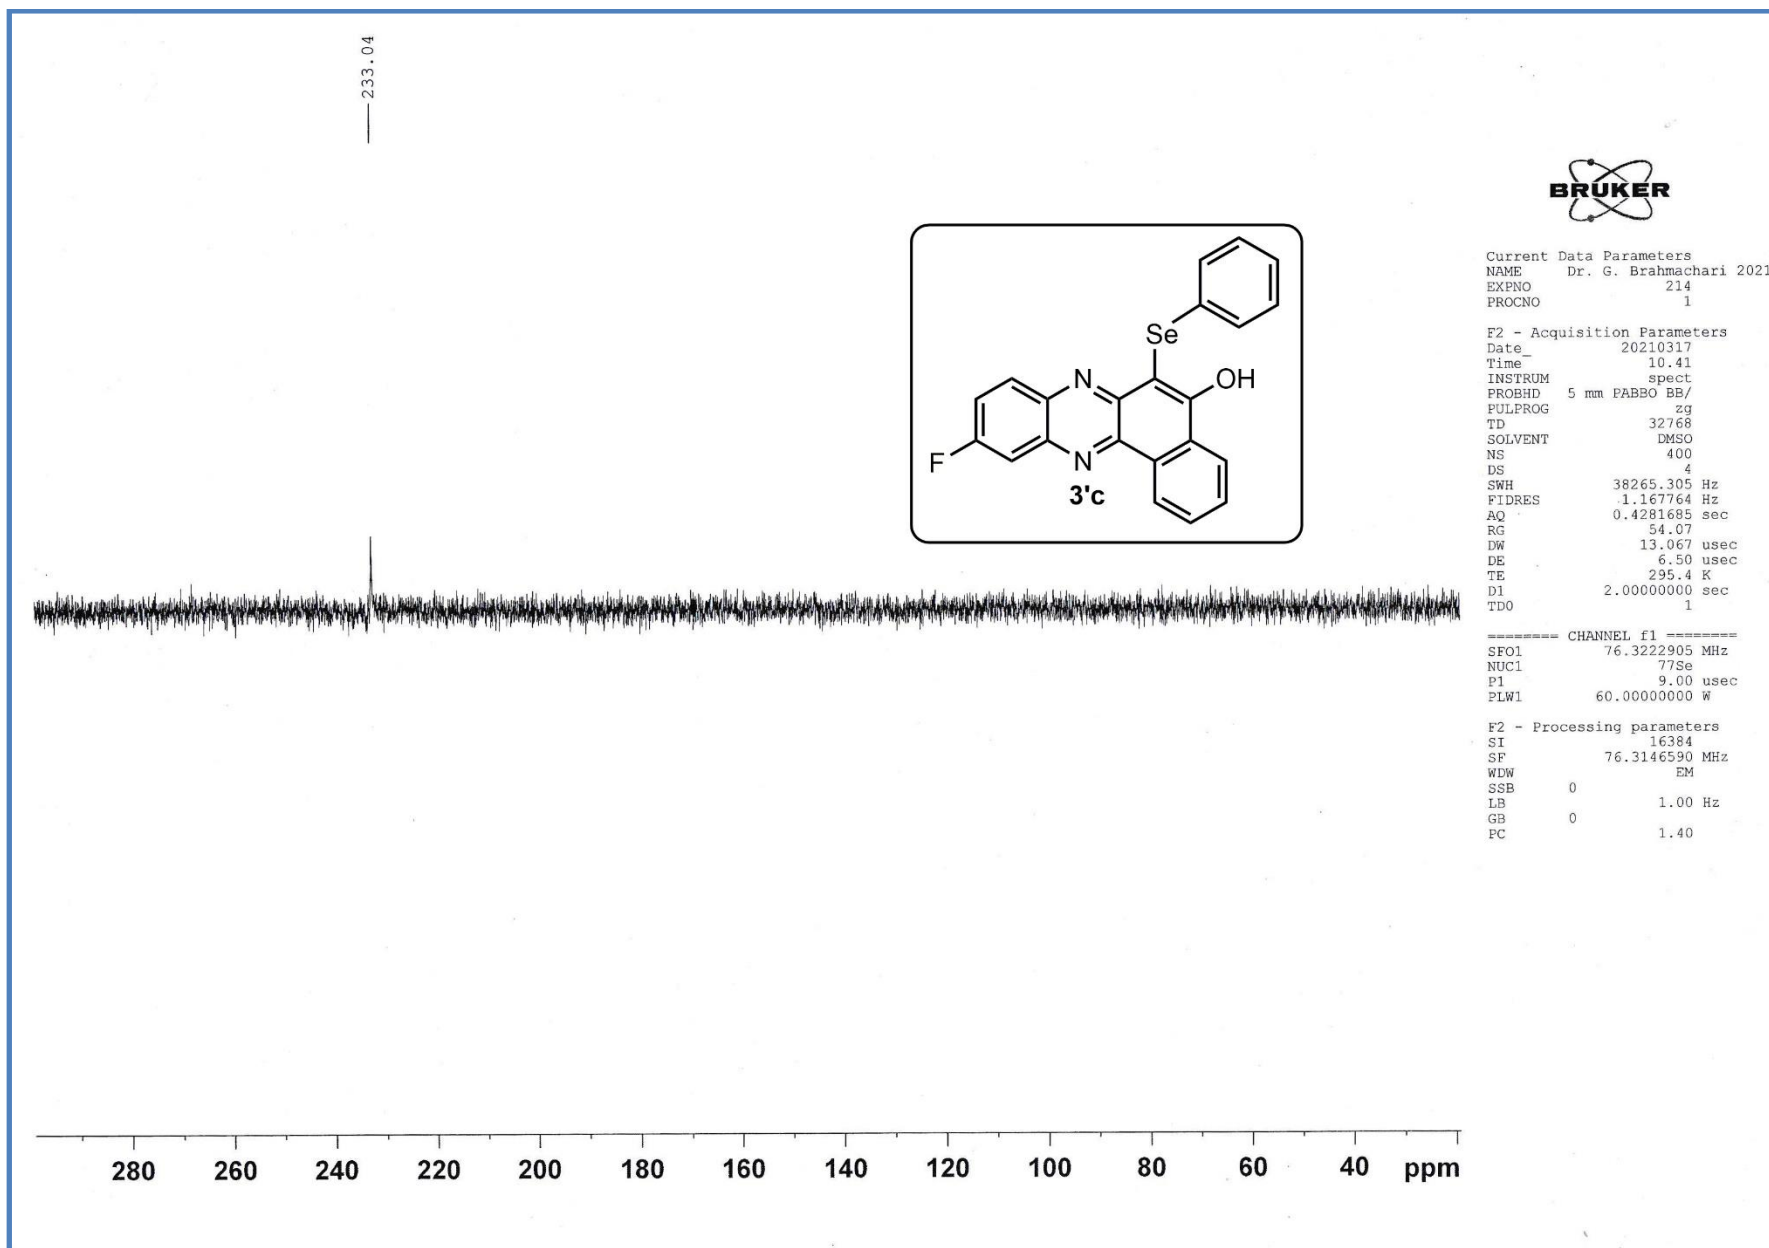

Figure S89. <sup>77</sup>Se-NMR spectrum of 10-fluoro-6-(phenylselanyl)benzo[*a*]phenazin-5-ol (3'c)



## Display Report

### Analysis Info

Analysis Name D:\Data\User data\2020\JAN\GB-58.d  
Method Tune\_pos\_Mid.m  
Sample Name GB-58  
Comment methanol fraction

Acquisition Date 1/6/2020 2:53:40 PM

Operator IISER Kalyani  
Instrument maXis impact 8282001.00127

### Acquisition Parameter

|             |          |                      |          |                  |           |
|-------------|----------|----------------------|----------|------------------|-----------|
| Source Type | ESI      | Ion Polarity         | Positive | Set Nebulizer    | 0.4 Bar   |
| Focus       | Active   | Set Capillary        | 3400 V   | Set Dry Heater   | 200 °C    |
| Scan Begin  | 50 m/z   | Set End Plate Offset | -500 V   | Set Dry Gas      | 4.0 l/min |
| Scan End    | 3000 m/z | Set Charging Voltage | 2000 V   | Set Divert Valve | Source    |
|             |          | Set Corona           | 0 nA     | Set APCI Heater  | 0 °C      |

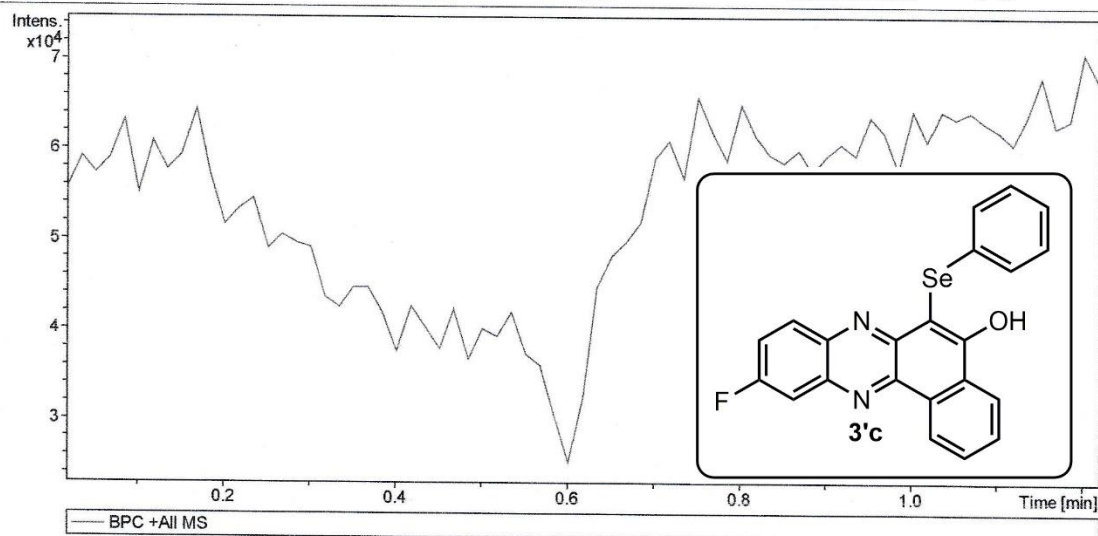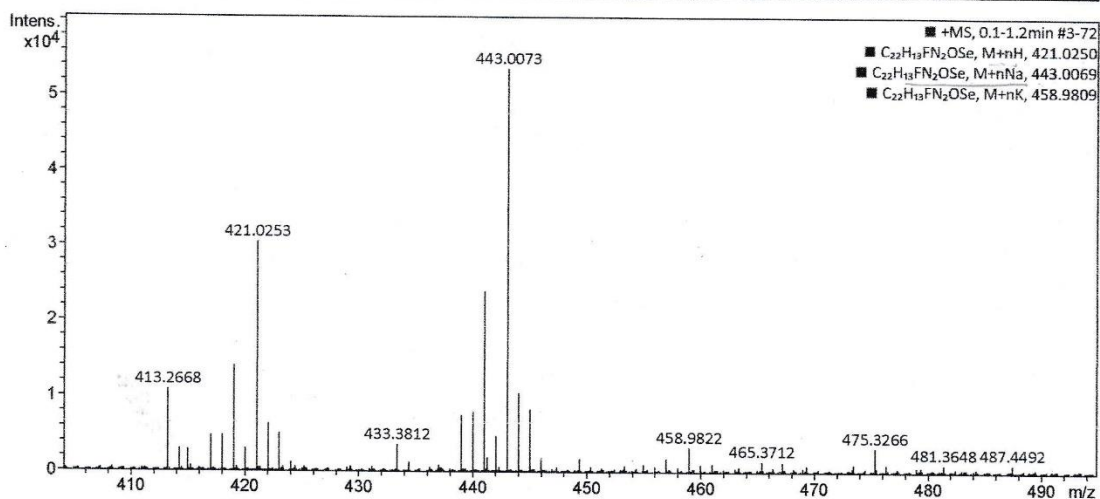

GB-58.d

Bruker Compass DataAnalysis 4.1

printed: 1/6/2020 2:58:57 PM

by: IISER Kalyani

Page 1 of 1

Figure S90. High-resolution Mass spectra of 10-fluoro-6-(phenylselanyl)benzo[a]phenazin-5-ol (3'c)

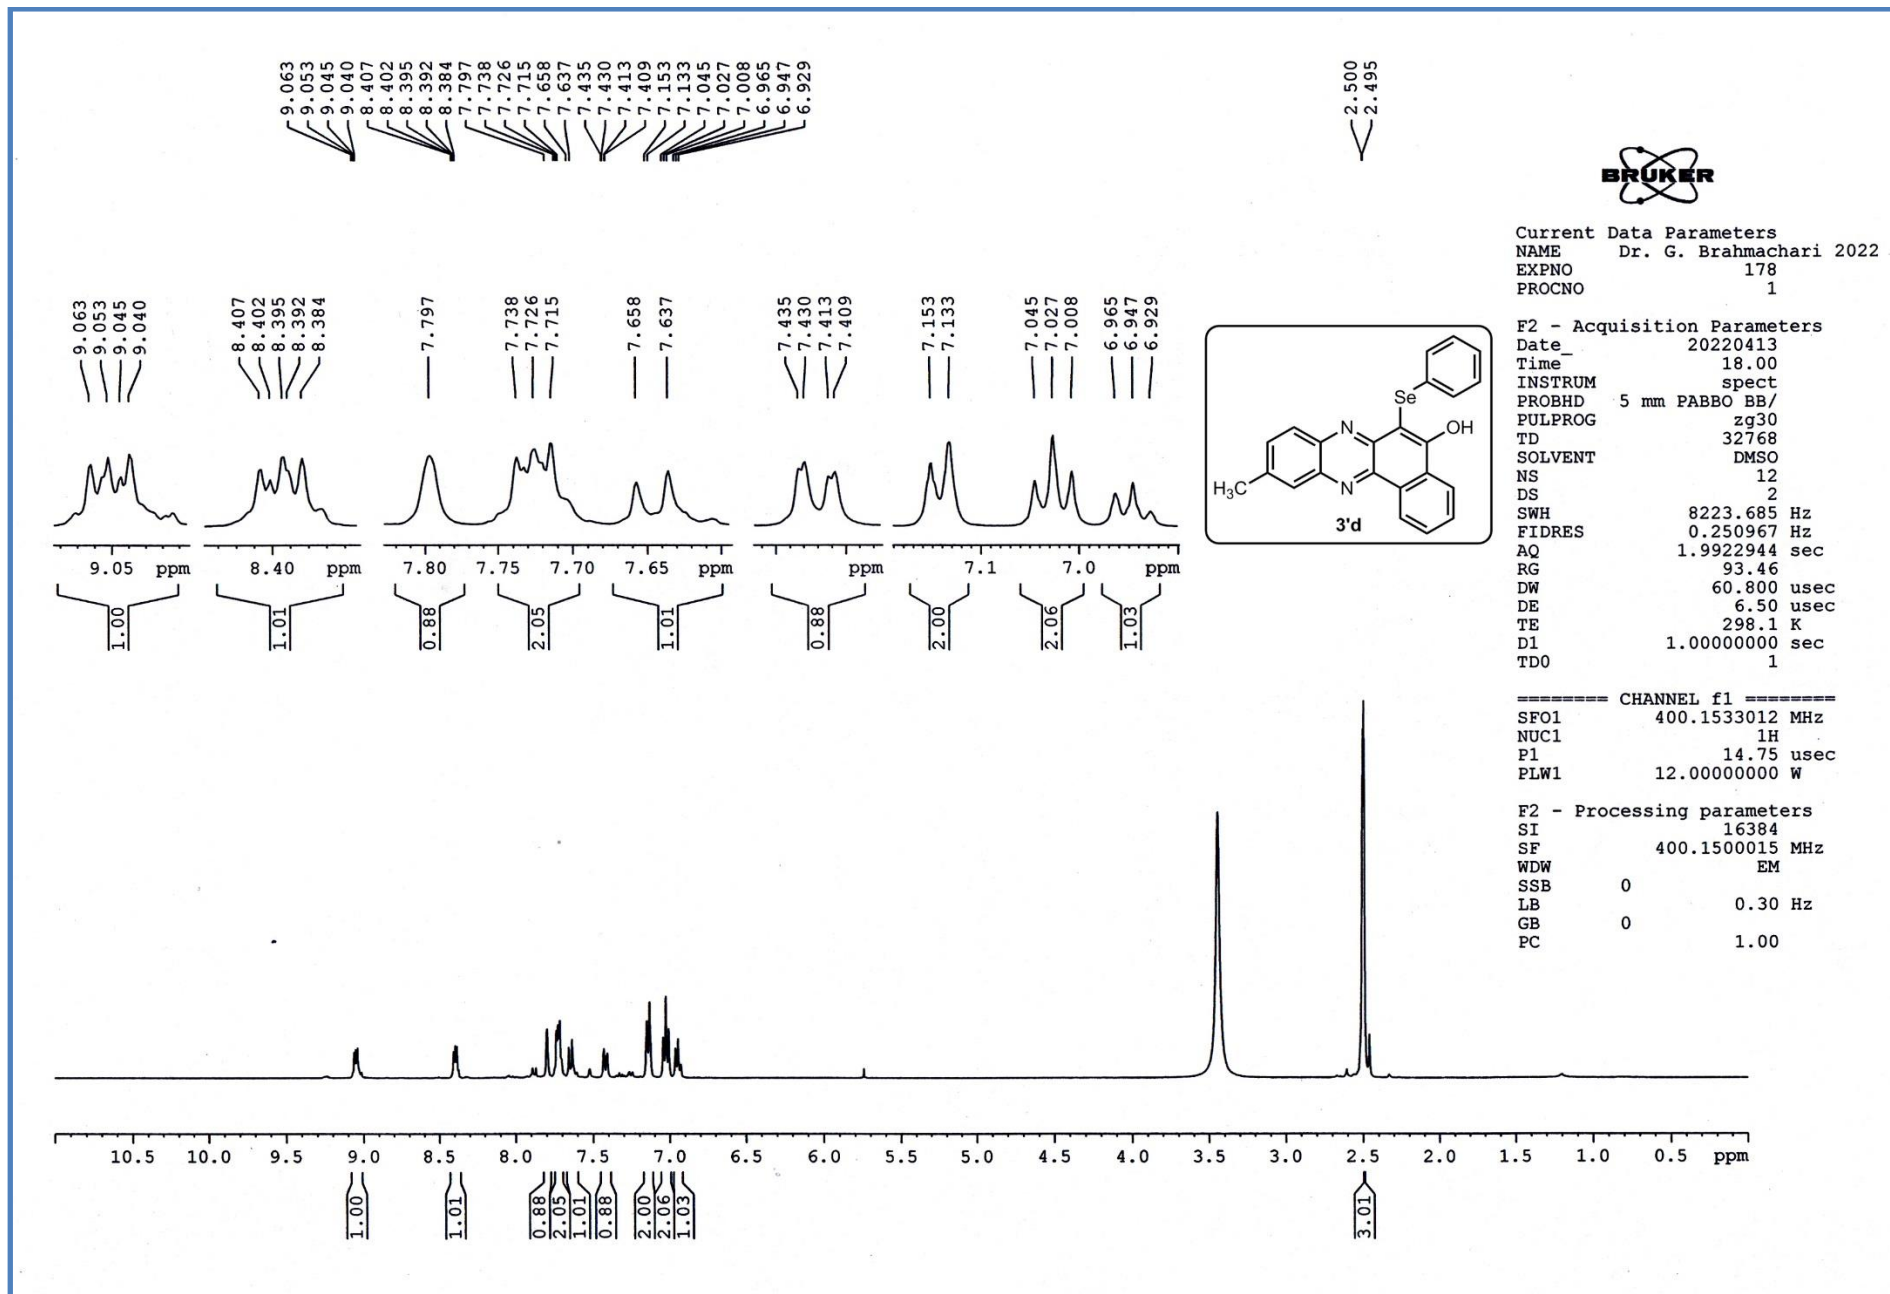

Figure S91. <sup>1</sup>H-NMR spectrum of 10-methyl-6-(phenylselanyl)benzo[*a*]phenazin-5-ol (**3'd**)

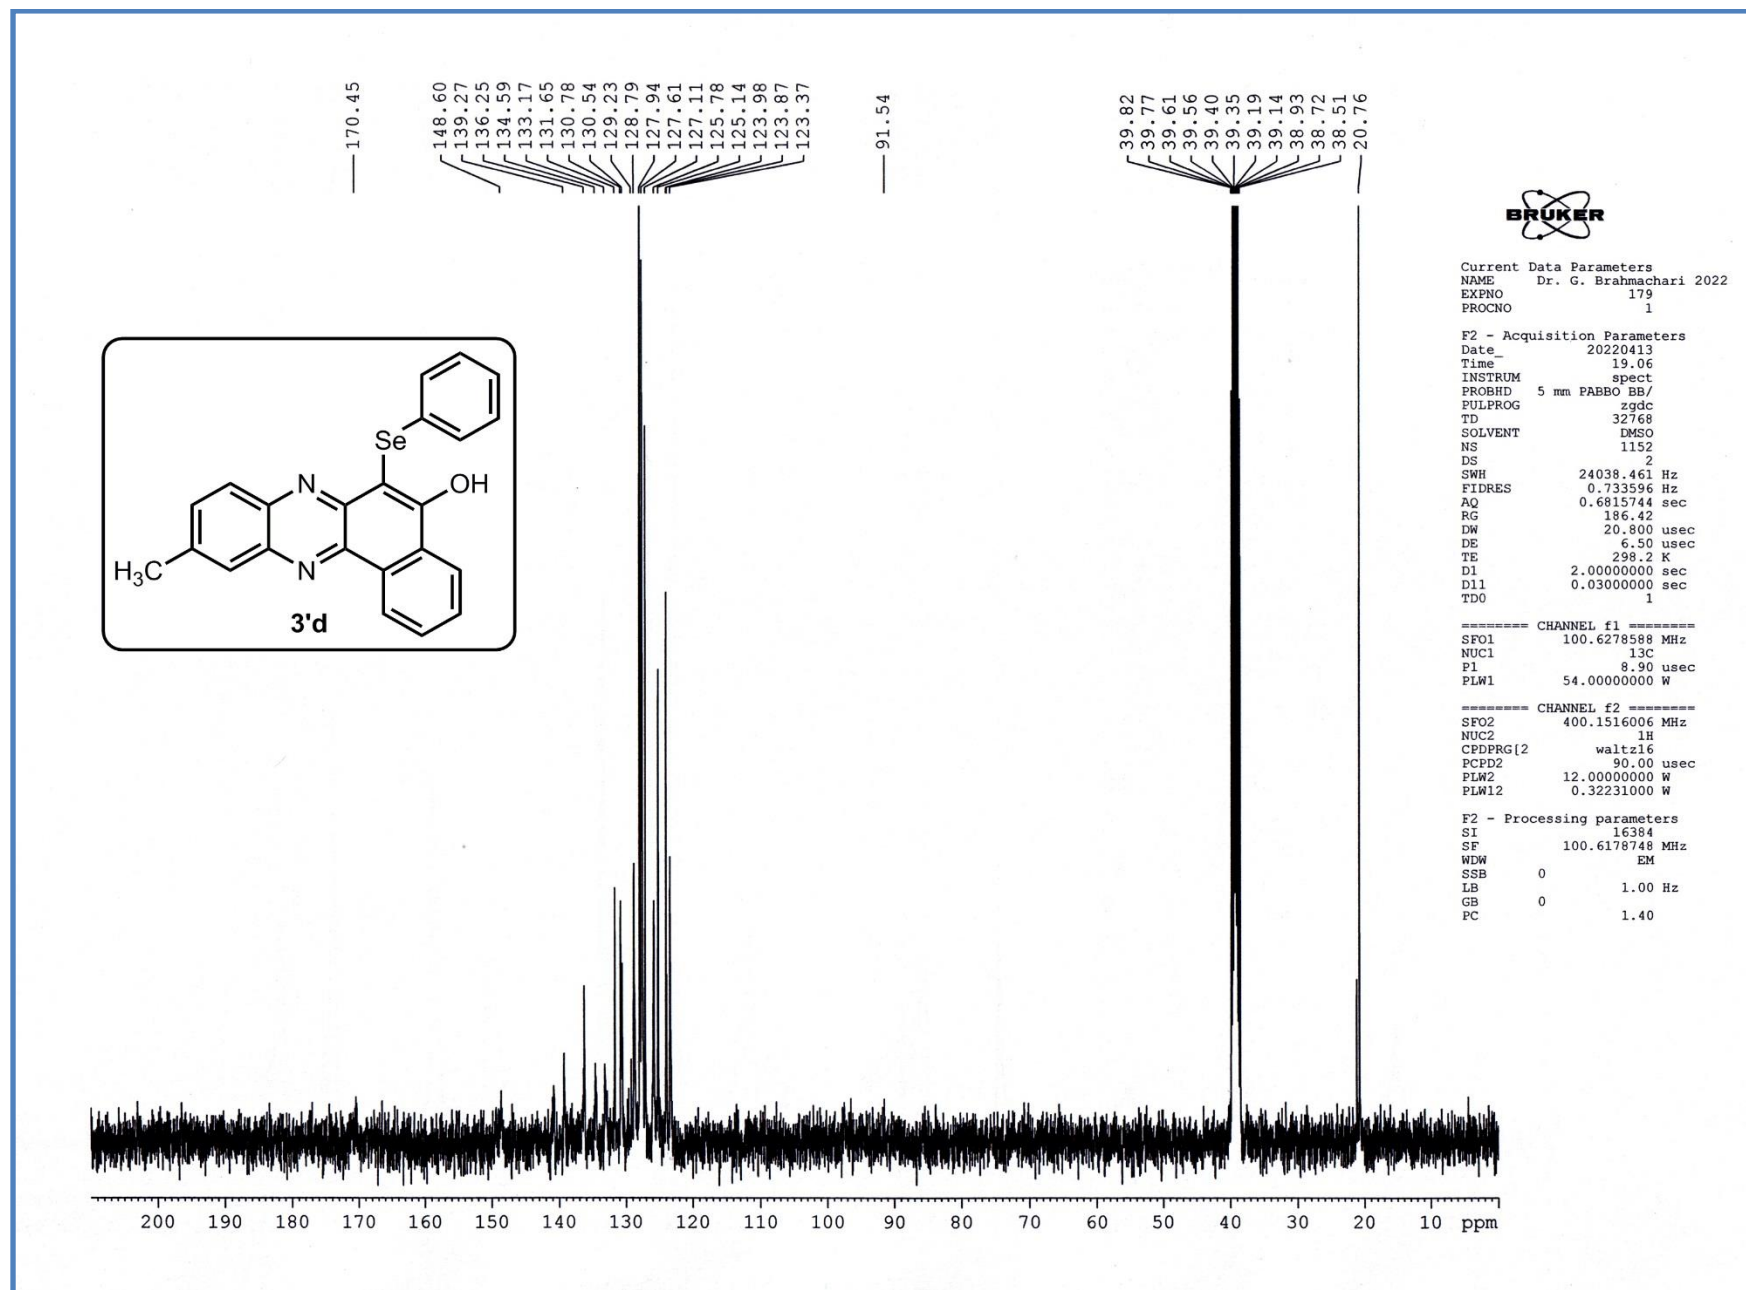

Figure S92. <sup>13</sup>C-NMR spectrum of 10-methyl-6-(phenylselanyl)benzo[a]phenazin-5-ol (**3'd**)

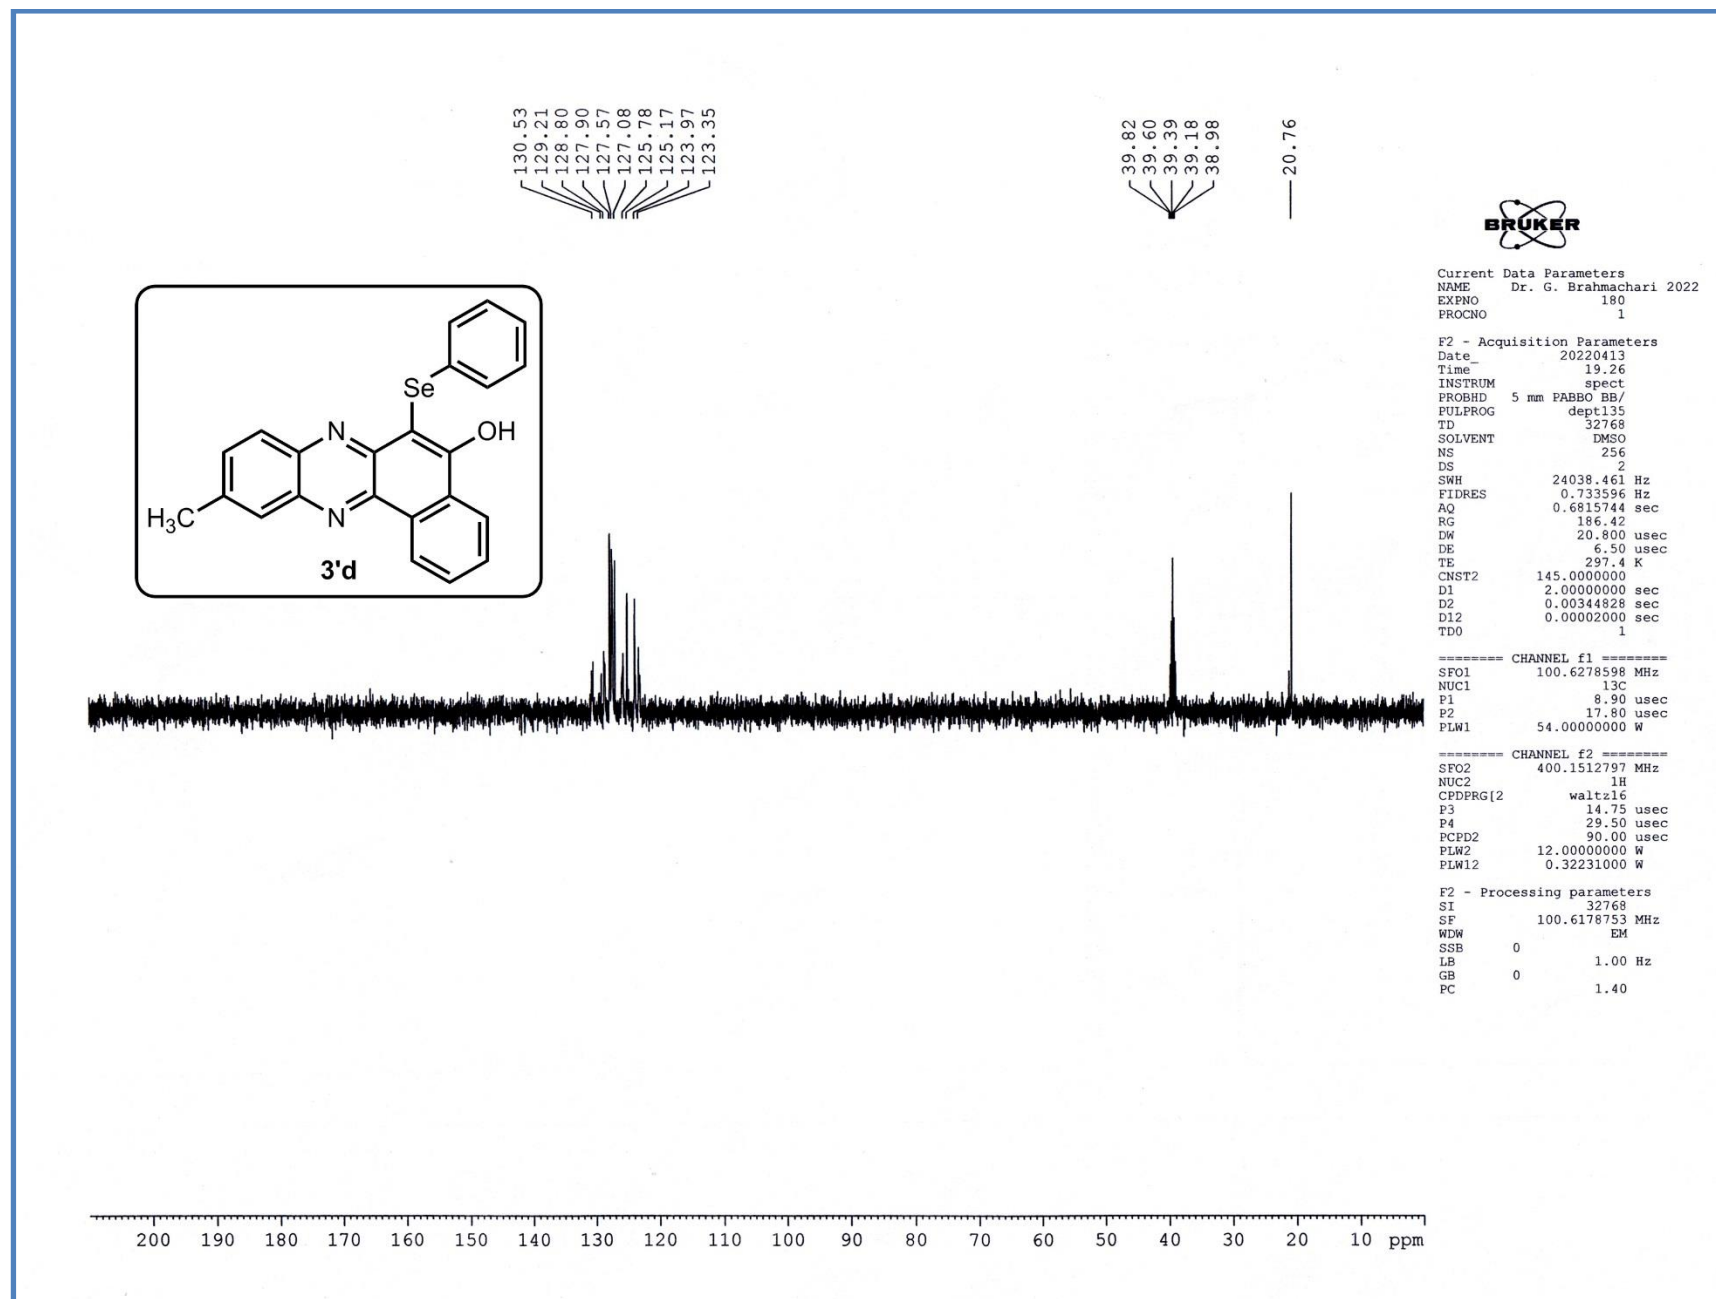

Figure S93. DEPT-135 NMR spectrum of 10-methyl-6-(phenylselanyl)benzo[*a*]phenazin-5-ol (**3'd**)

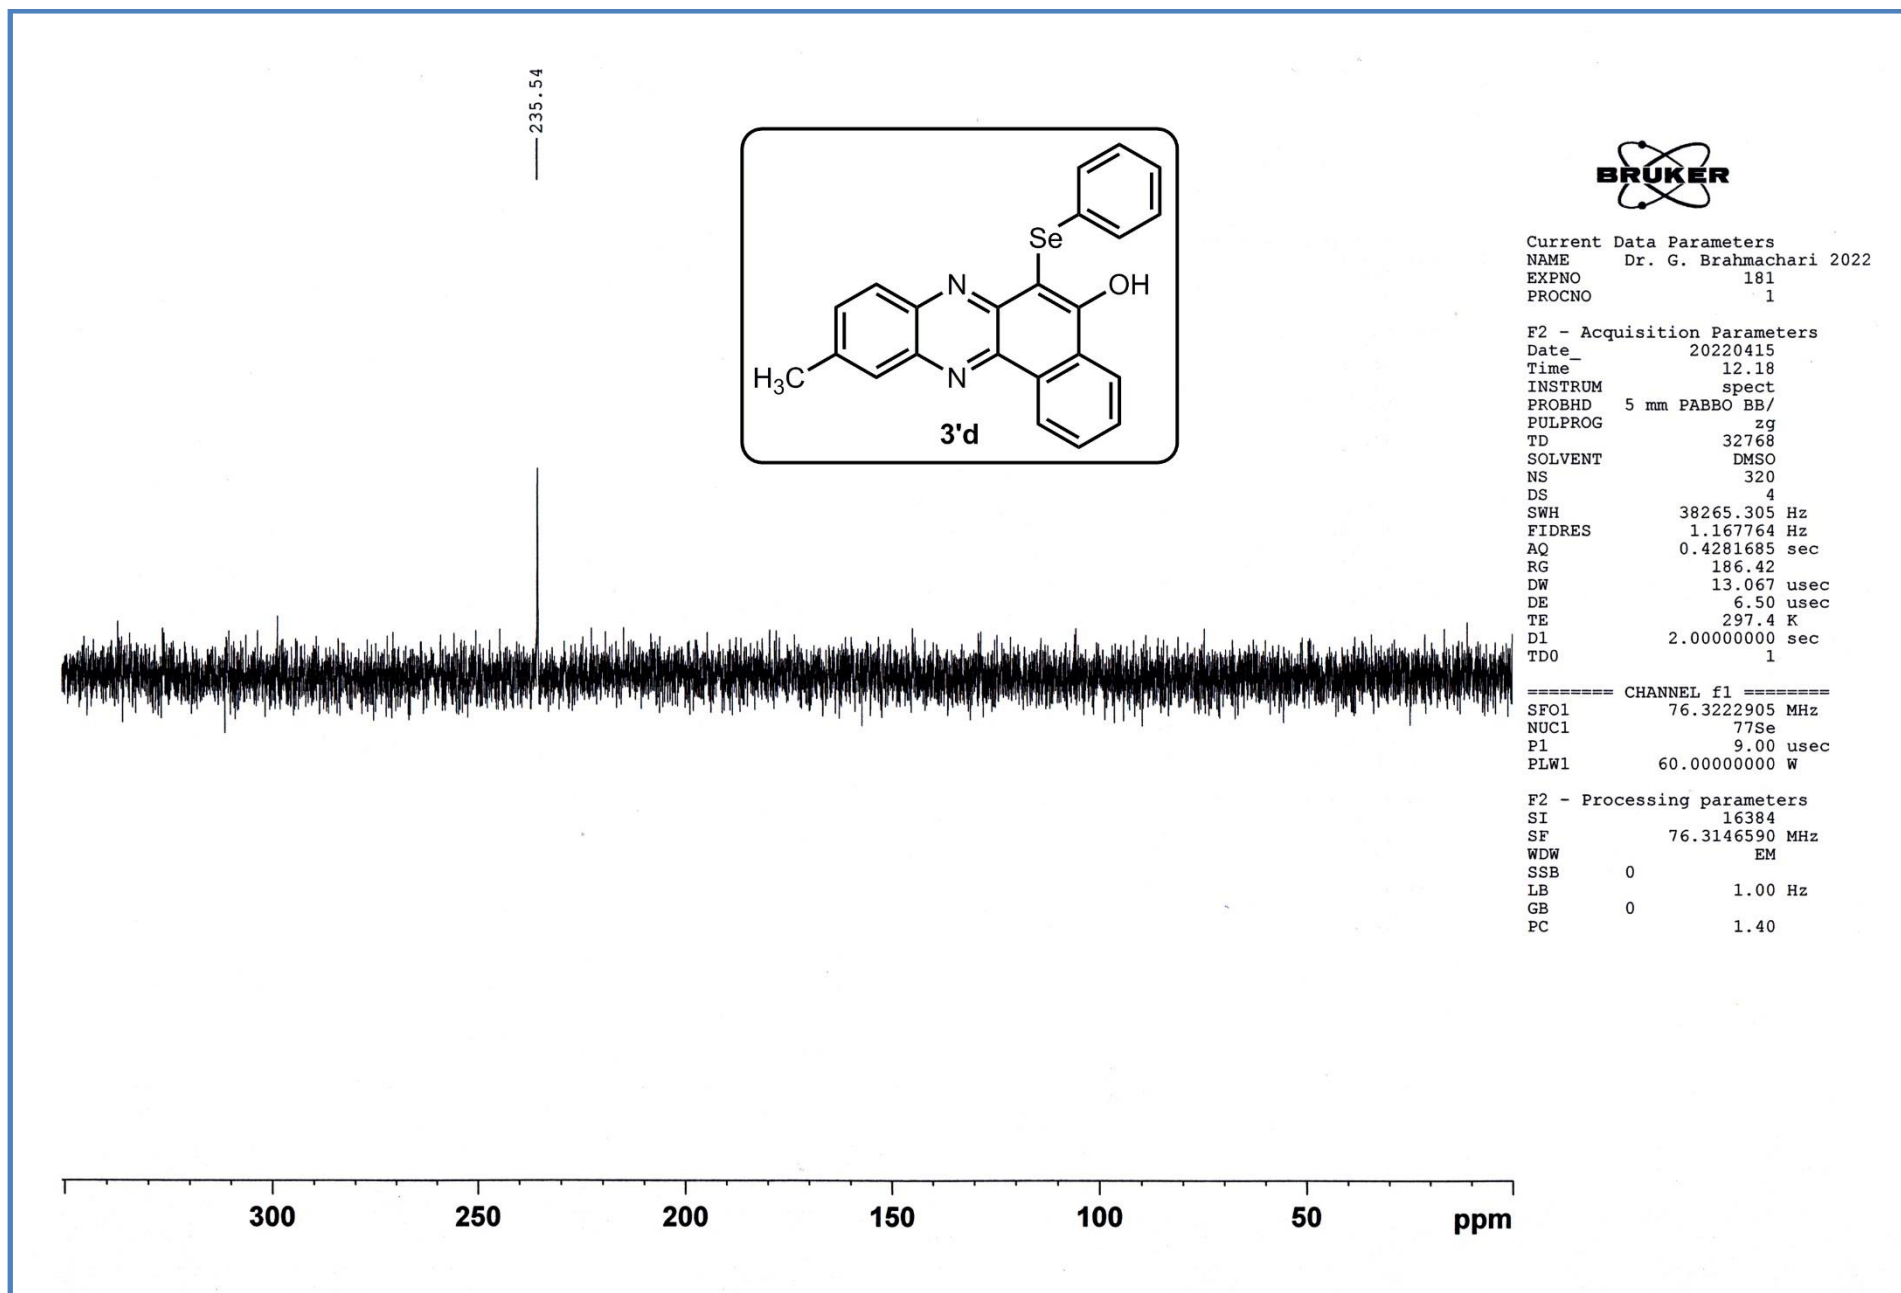

Figure S94.  $^{77}\text{Se}$ -NMR spectrum of 10-methyl-6-(phenylselanyl)benzo[*a*]phenazin-5-ol (**3'd**)

# Display Report

## Analysis Info

Analysis Name D:\Data\User data\2019\JULY\GB\_19.d  
Method Tune\_pos\_Standard.m  
Sample Name GB\_19  
Comment

Acquisition Date 7/18/2019 4:46:54 PM

Operator IISER Kalyani  
Instrument maXis impact 8282001.00127

## Acquisition Parameter

|             |          |                      |          |                  |           |
|-------------|----------|----------------------|----------|------------------|-----------|
| Source Type | ESI      | Ion Polarity         | Positive | Set Nebulizer    | 0.3 Bar   |
| Focus       | Active   | Set Capillary        | 3400 V   | Set Dry Heater   | 200 °C    |
| Scan Begin  | 50 m/z   | Set End Plate Offset | -500 V   | Set Dry Gas      | 4.0 l/min |
| Scan End    | 1000 m/z | Set Charging Voltage | 2000 V   | Set Divert Valve | Source    |
|             |          | Set Corona           | 0 nA     | Set APCI Heater  | 0 °C      |

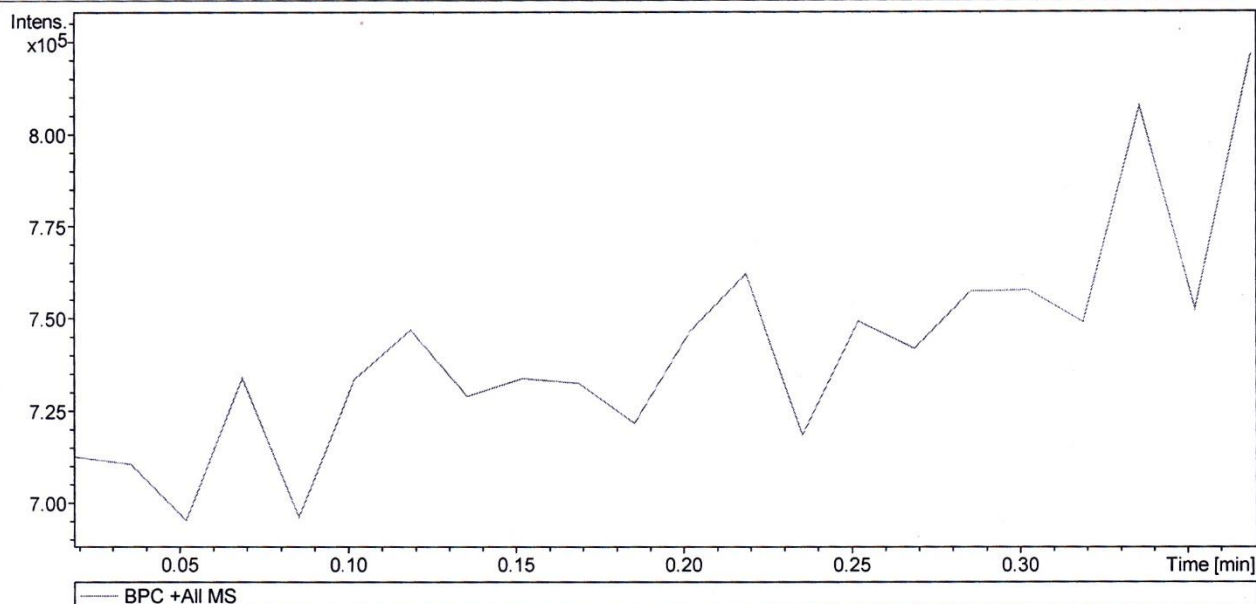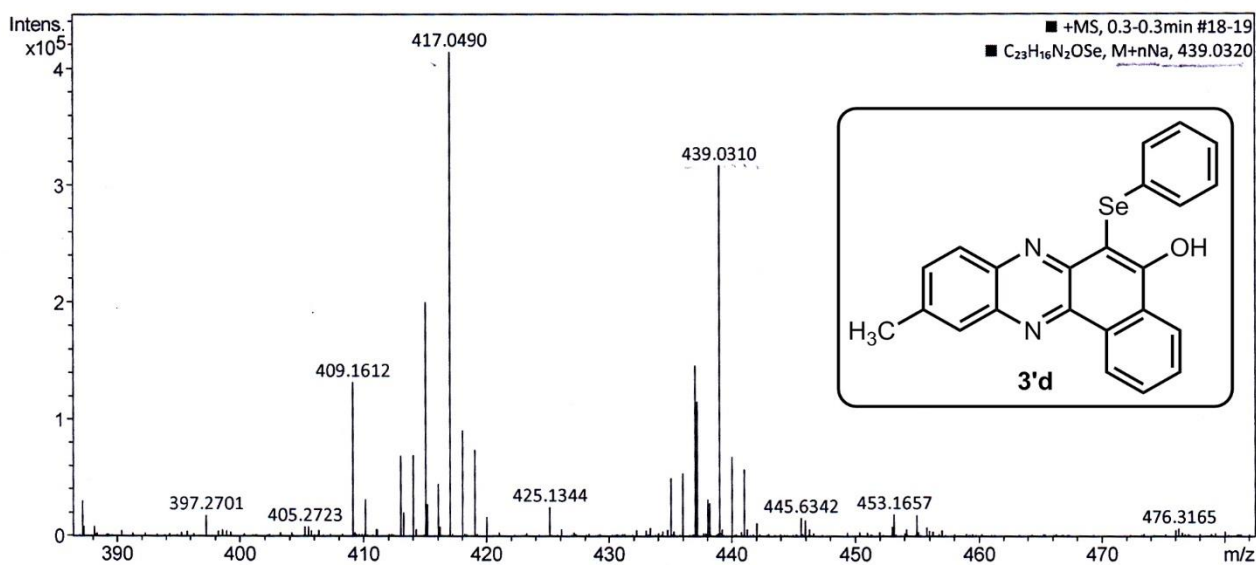

GB\_19.d

Bruker Compass DataAnalysis 4.1

printed: 7/18/2019 4:50:25 PM

by: IISER Kalyani

Page 1 of 1

Figure S95. High-resolution Mass spectra of 10-methyl-6-(phenylselanyl)benzo[*a*]phenazin-5-ol (**3'd**)

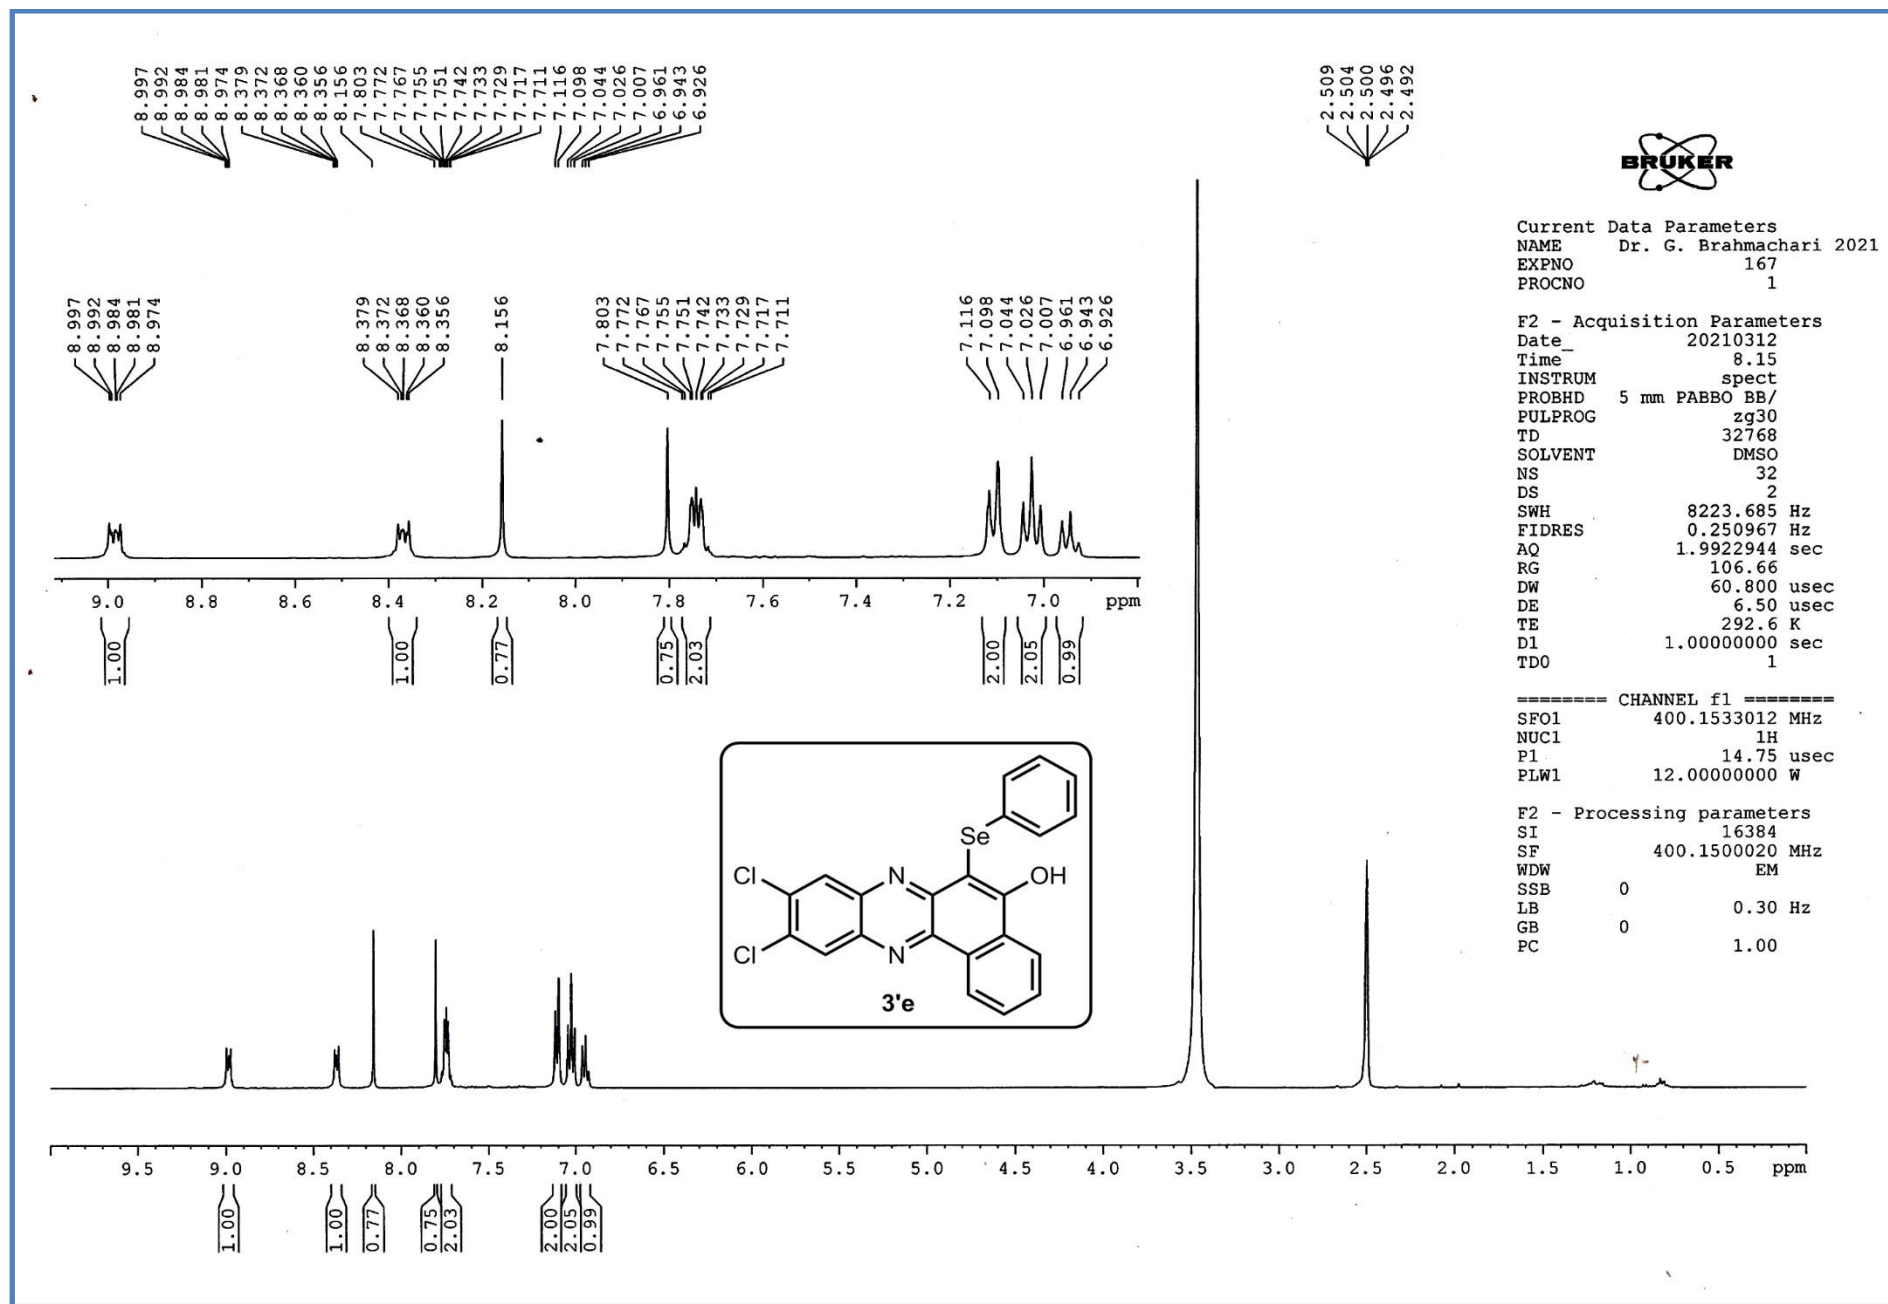

Figure S96. <sup>1</sup>H-NMR spectrum of 9,10-dichloro-6-(phenylselanyl)benzo[a]phenazin-5-ol (**3'e**)

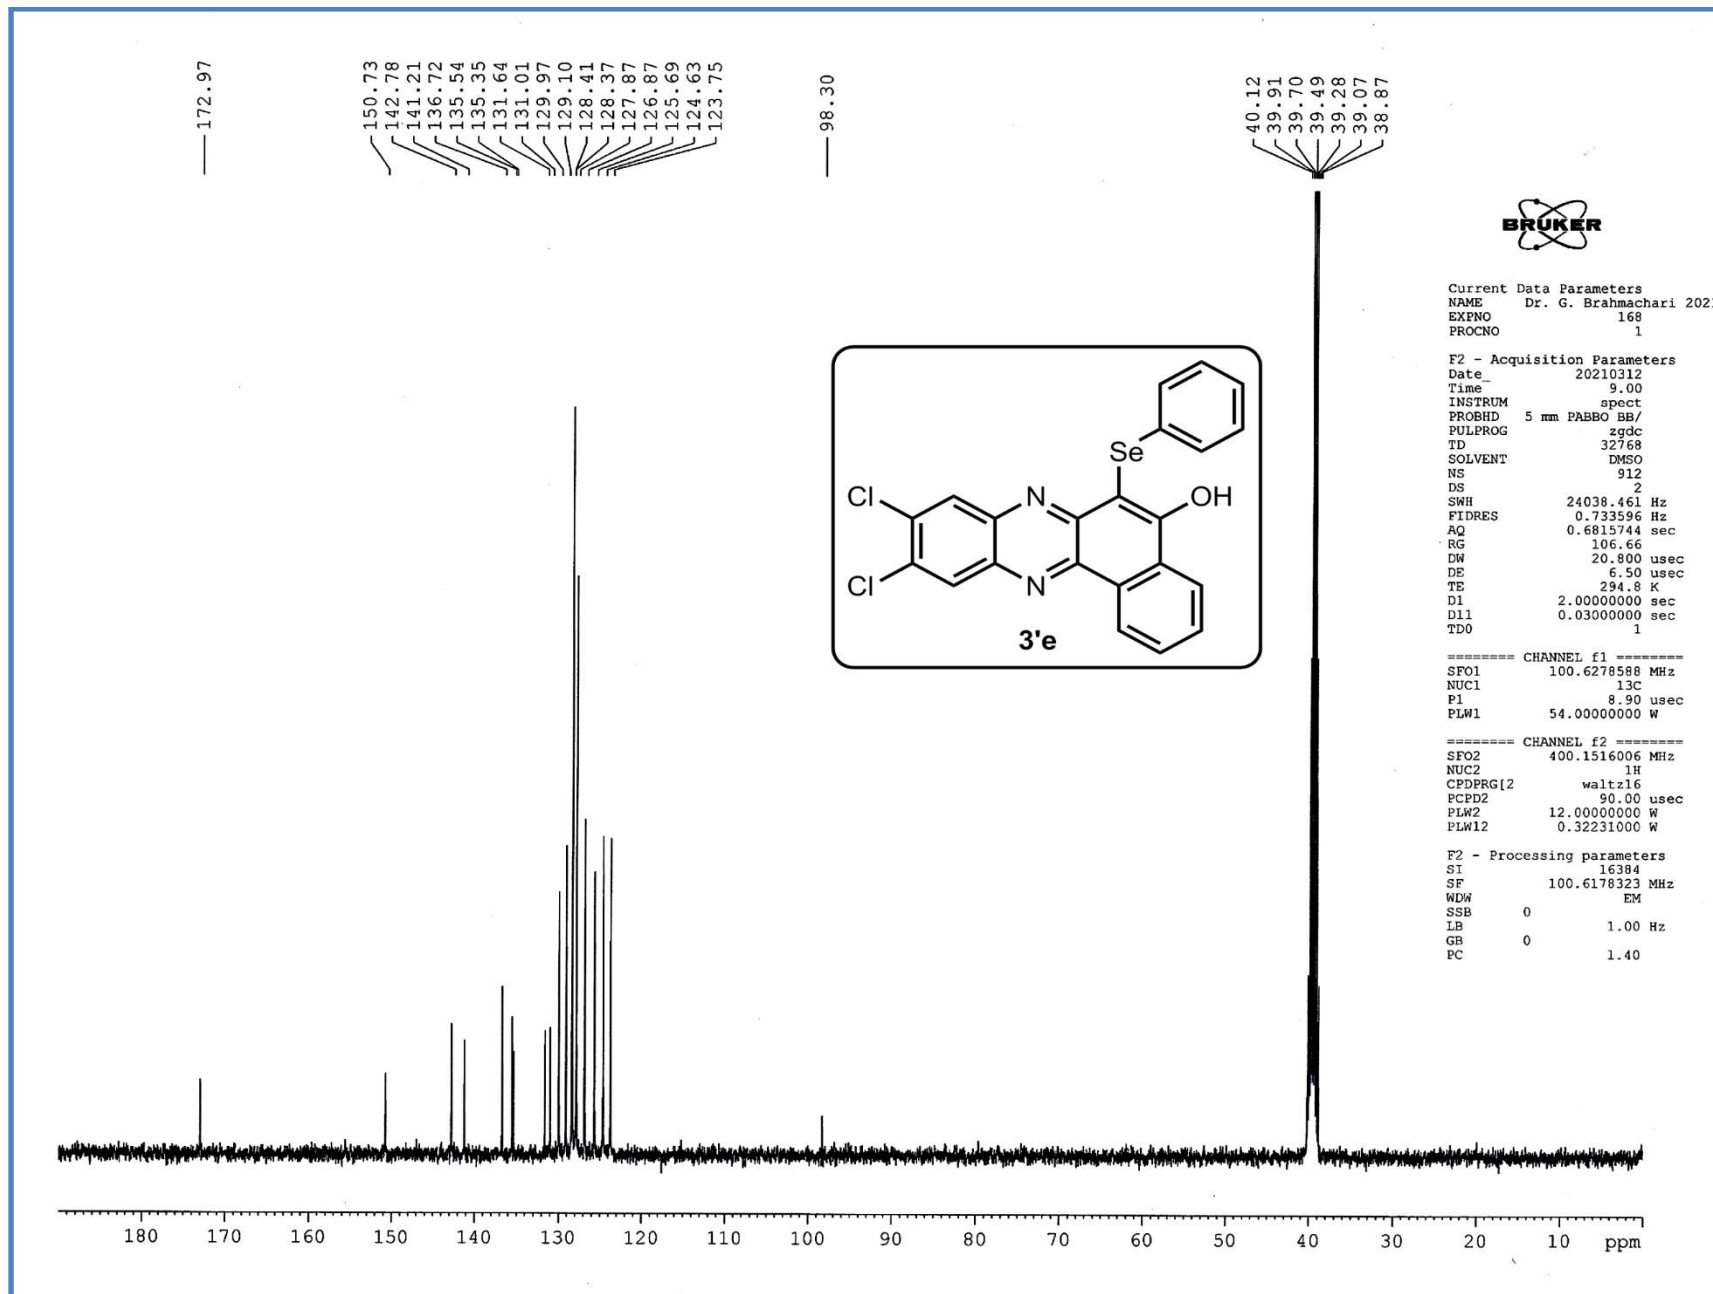

Figure S97.  $^{13}\text{C}$ -NMR spectrum of 9,10-dichloro-6-(phenylselanyl)benzo[*a*]phenazin-5-ol (**3'e**)



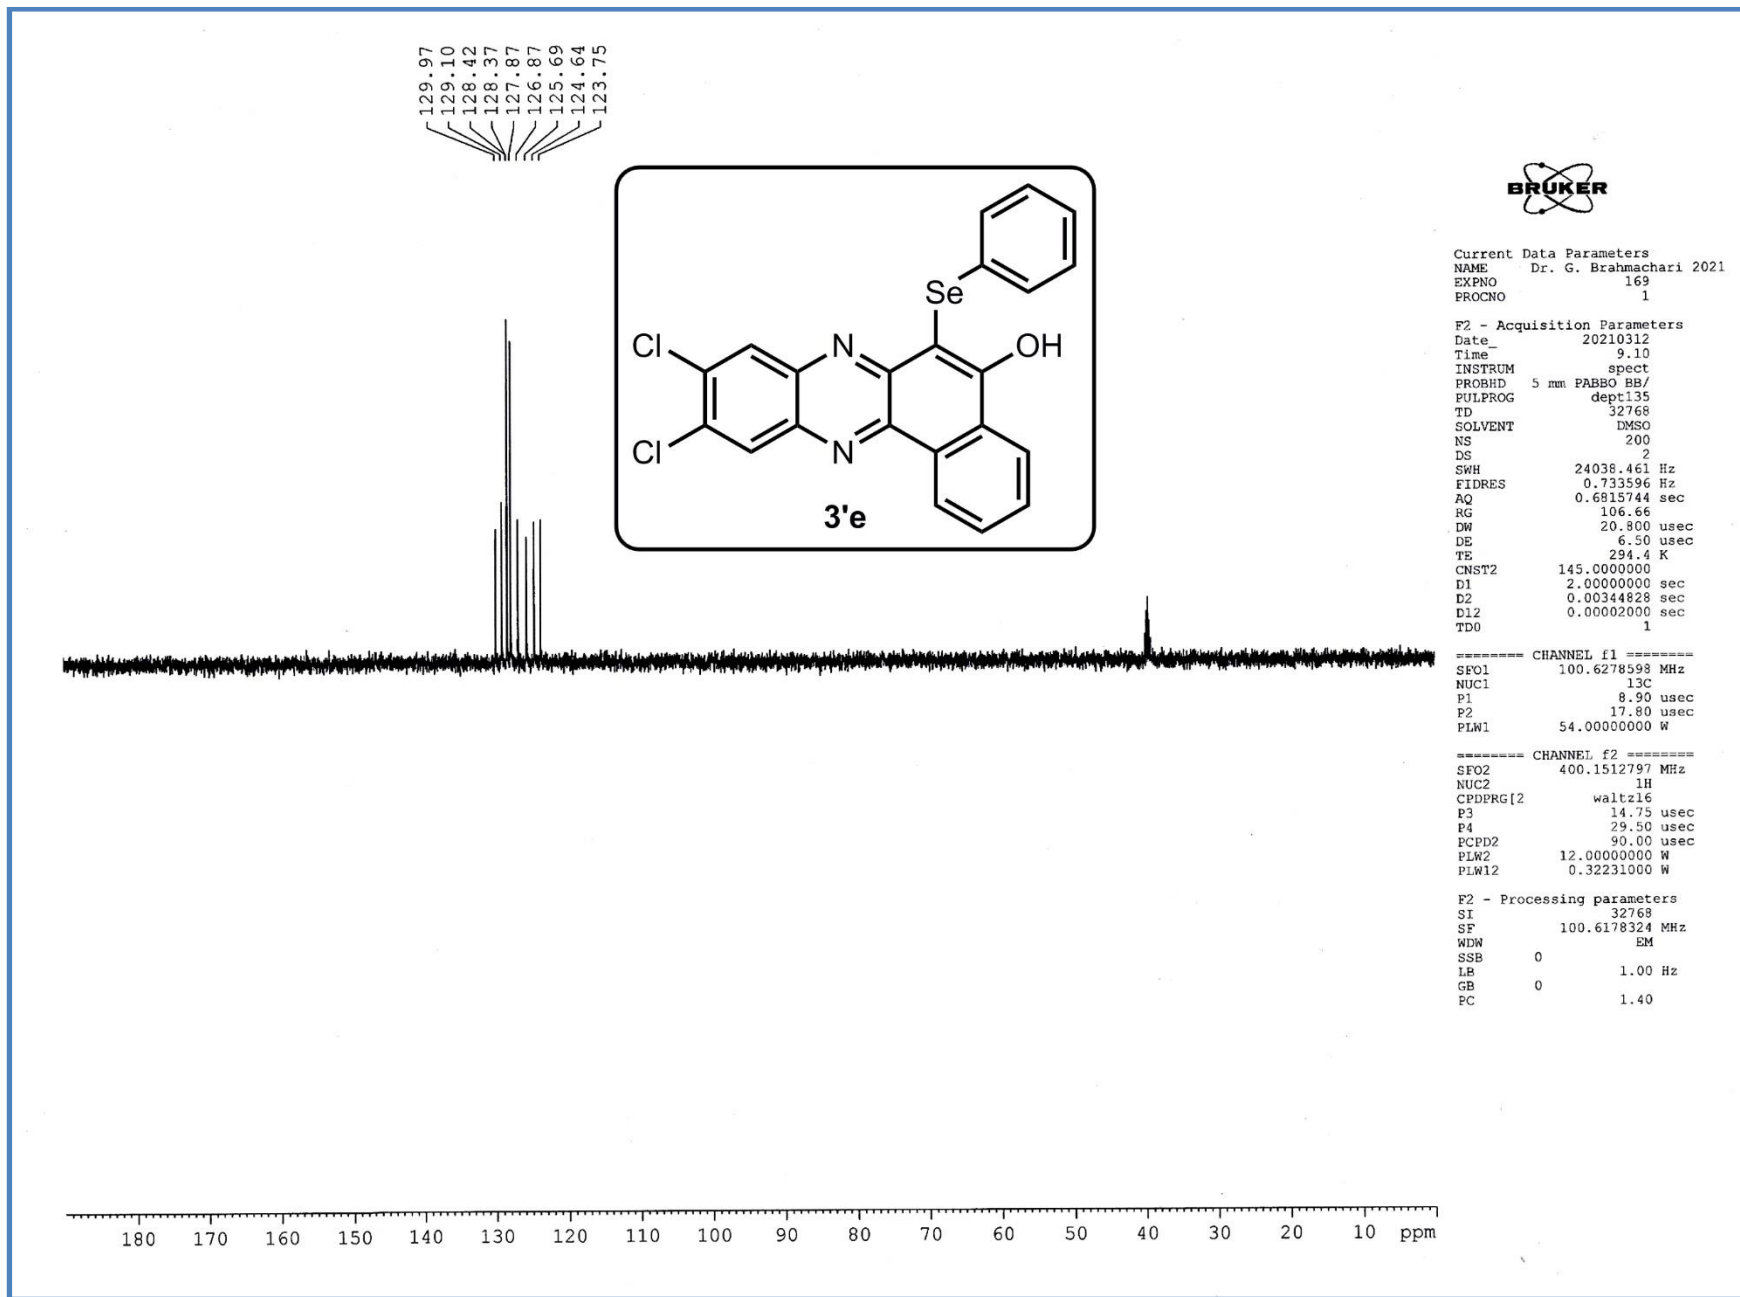

Figure S98. DEPT-135 NMR spectrum of 9,10-dichloro-6-(phenylselanyl)benzo[*a*]phenazin-5-ol (**3'e**)

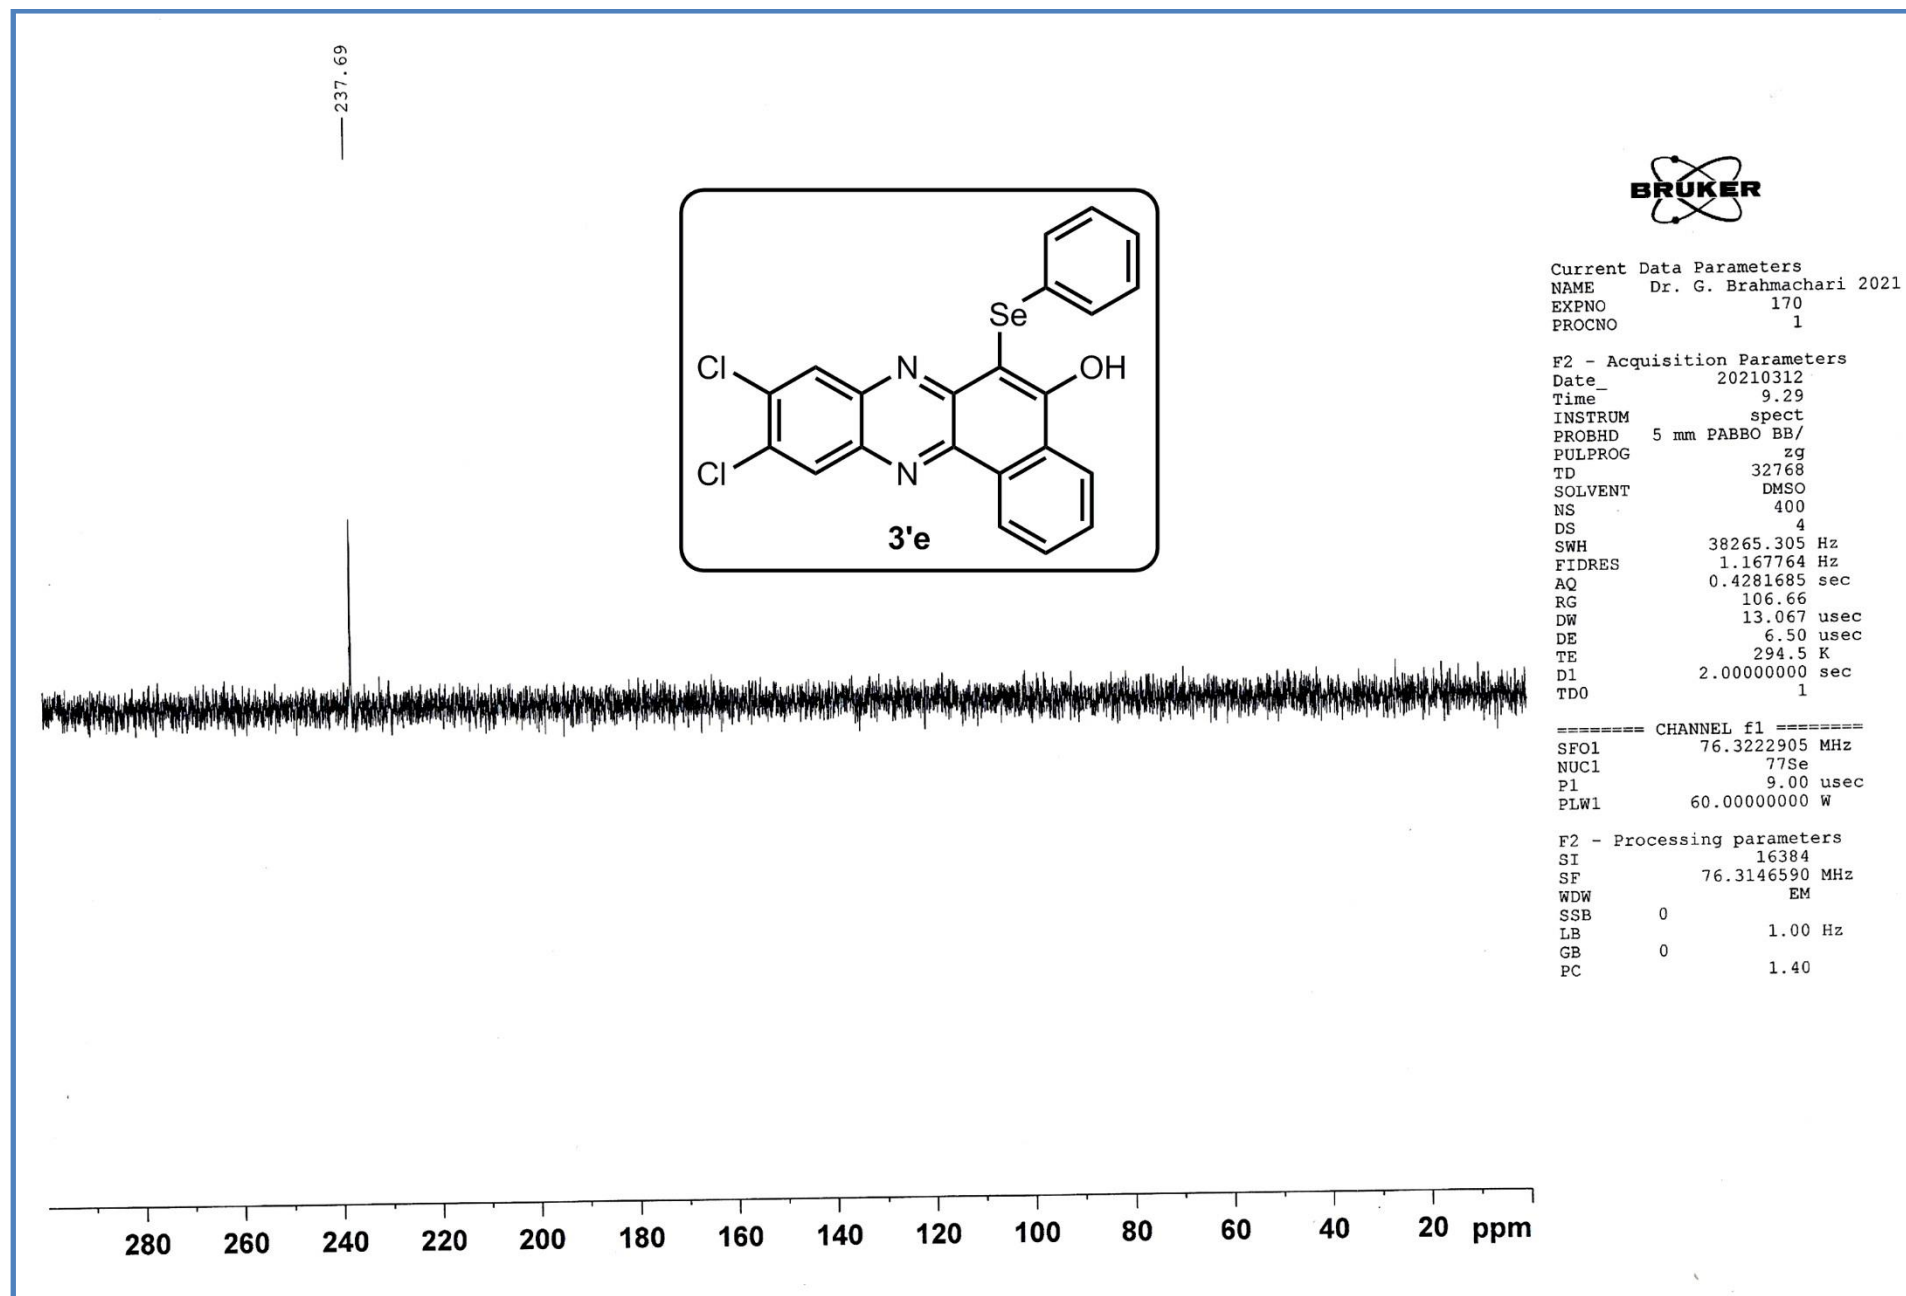

Figure S99.  $^{77}\text{Se}$ -NMR spectrum of 9,10-dichloro-6-(phenylselanyl)benzo[a]phenazin-5-ol (**3'e**)

## Display Report

### Analysis Info

Analysis Name D:\Data\User data\2019\DEC\GB-52.d  
Method Tune\_pos\_Mid.m  
Sample Name GB-52  
Comment

Acquisition Date 12/31/2019 12:32:00 PM

Operator IISER Kalyani  
Instrument maXis impact 8282001.00127

### Acquisition Parameter

|             |          |                      |          |                  |           |
|-------------|----------|----------------------|----------|------------------|-----------|
| Source Type | ESI      | Ion Polarity         | Positive | Set Nebulizer    | 0.4 Bar   |
| Focus       | Active   | Set Capillary        | 3400 V   | Set Dry Heater   | 200 °C    |
| Scan Begin  | 50 m/z   | Set End Plate Offset | -500 V   | Set Dry Gas      | 4.0 l/min |
| Scan End    | 3000 m/z | Set Charging Voltage | 2000 V   | Set Divert Valve | Source    |
|             |          | Set Corona           | 0 nA     | Set APCI Heater  | 0 °C      |

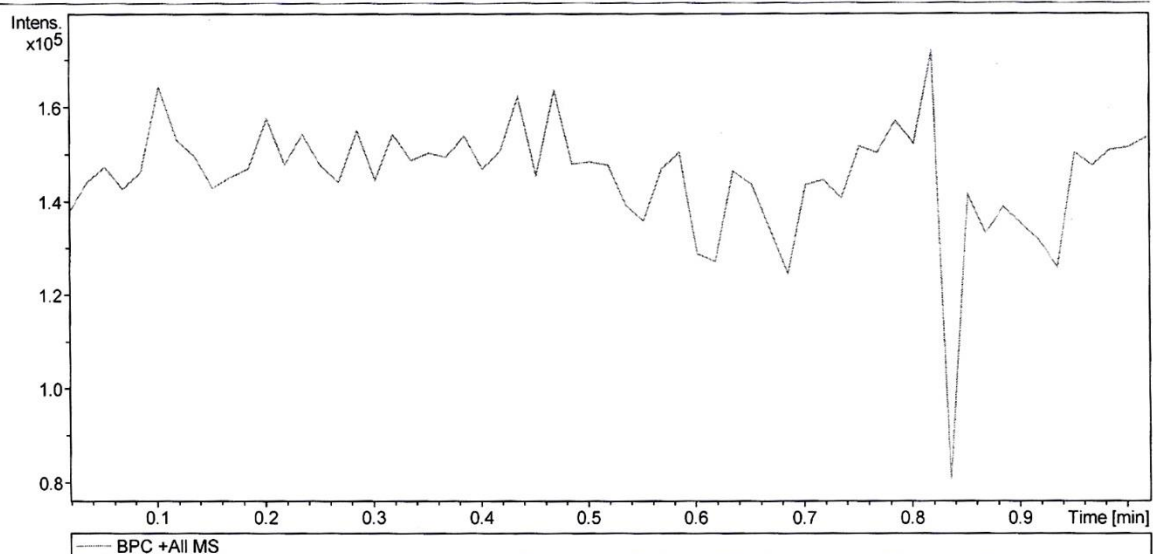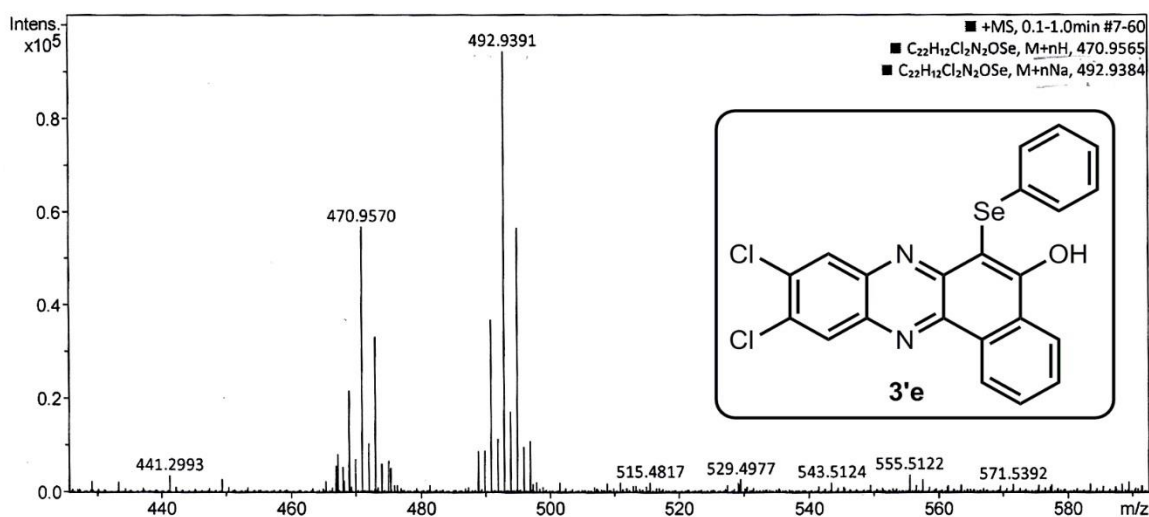

GB-52.d

Bruker Compass DataAnalysis 4.1

printed: 12/31/2019 12:39:47 PM

by: IISER Kalyani

Page 1 of 1

Figure S100. High-resolution Mass spectra of 9,10-dichloro-6-(phenylselanyl)benzo[*a*]phenazin-5-ol (**3'e**)

6. Scanned copies of  $^1\text{H}$  NMR and  $^{13}\text{C}$  NMR (for representative compound **7b**) spectra for all the synthesized benzophenones **7** (**7a–7c**) and benzaldehydes **9** (**9a–9b**) (Figure S101 – S105)

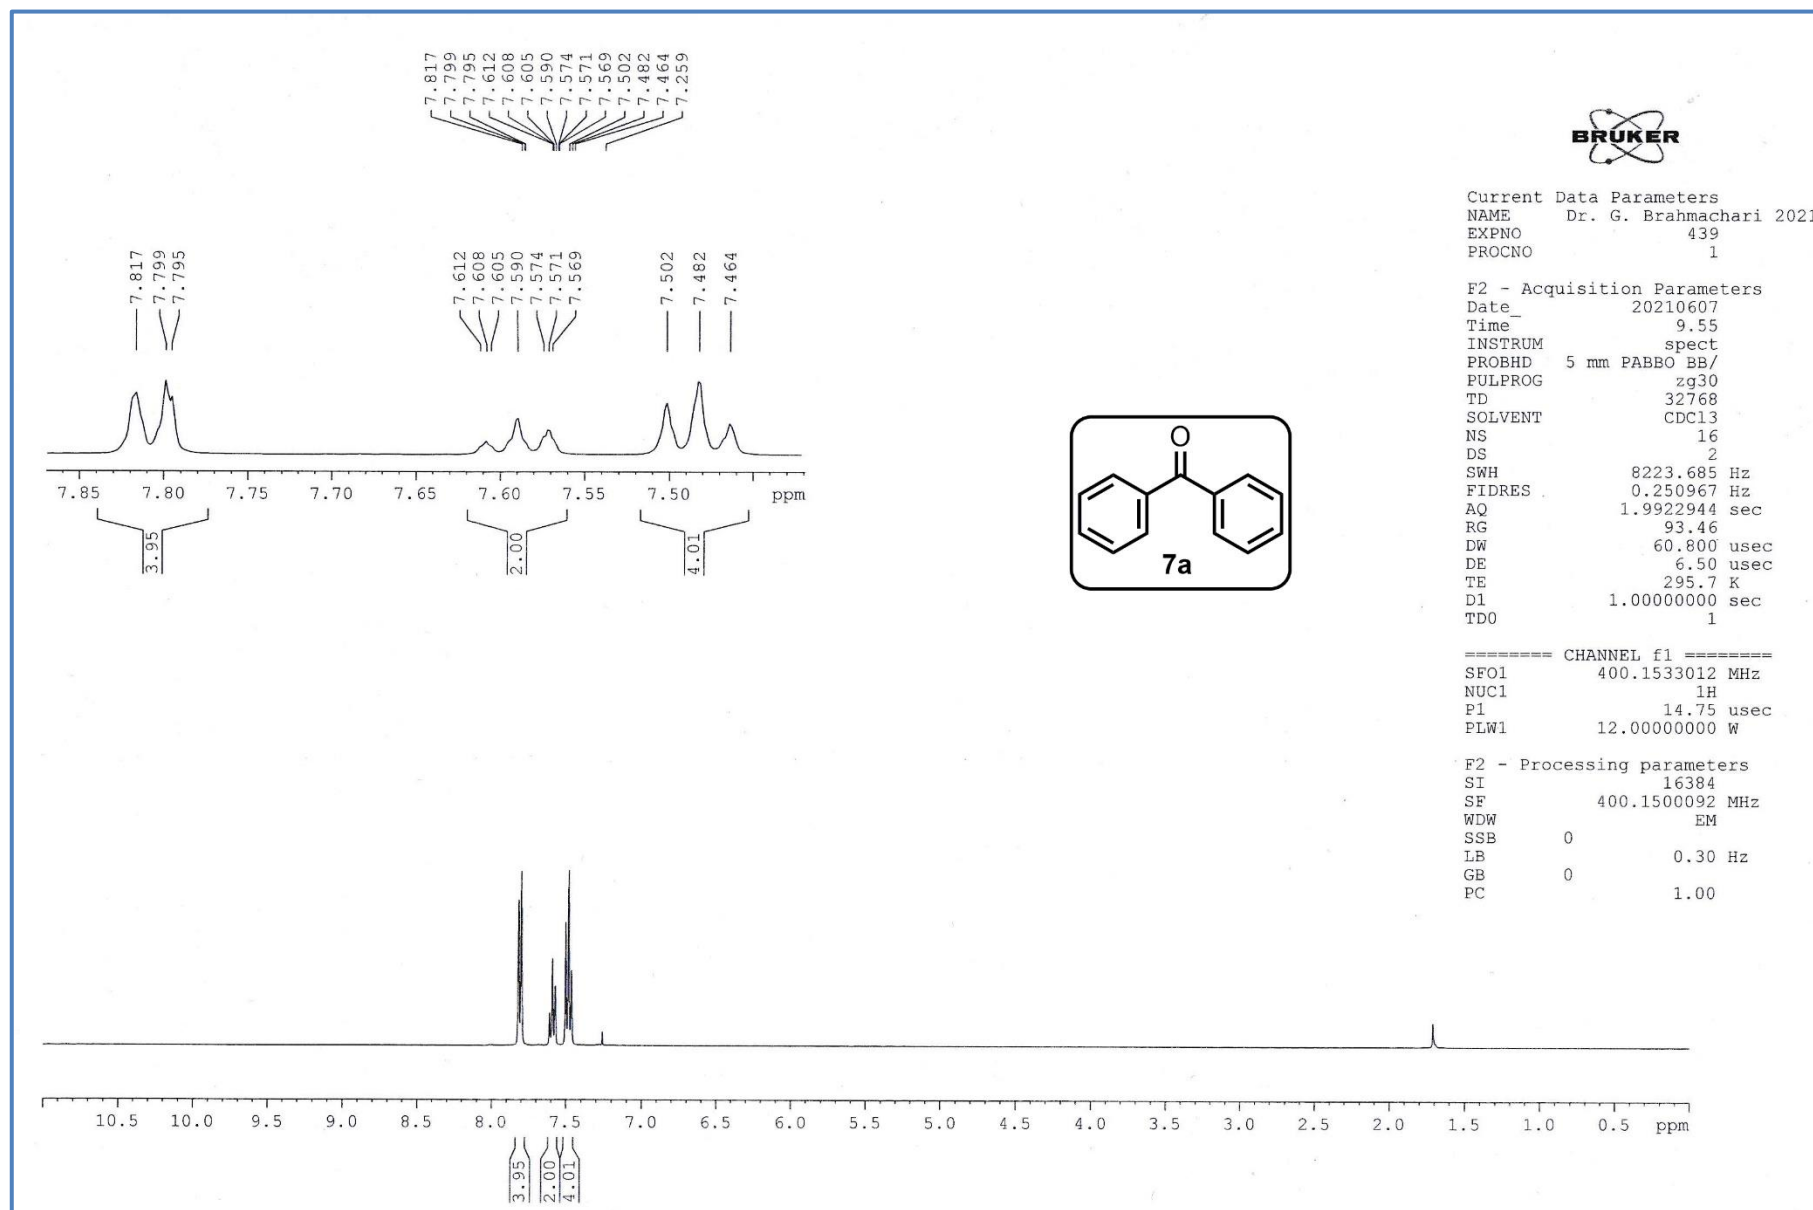

Figure S101.  $^1\text{H}$ -NMR spectrum of benzophenone (**7a**)

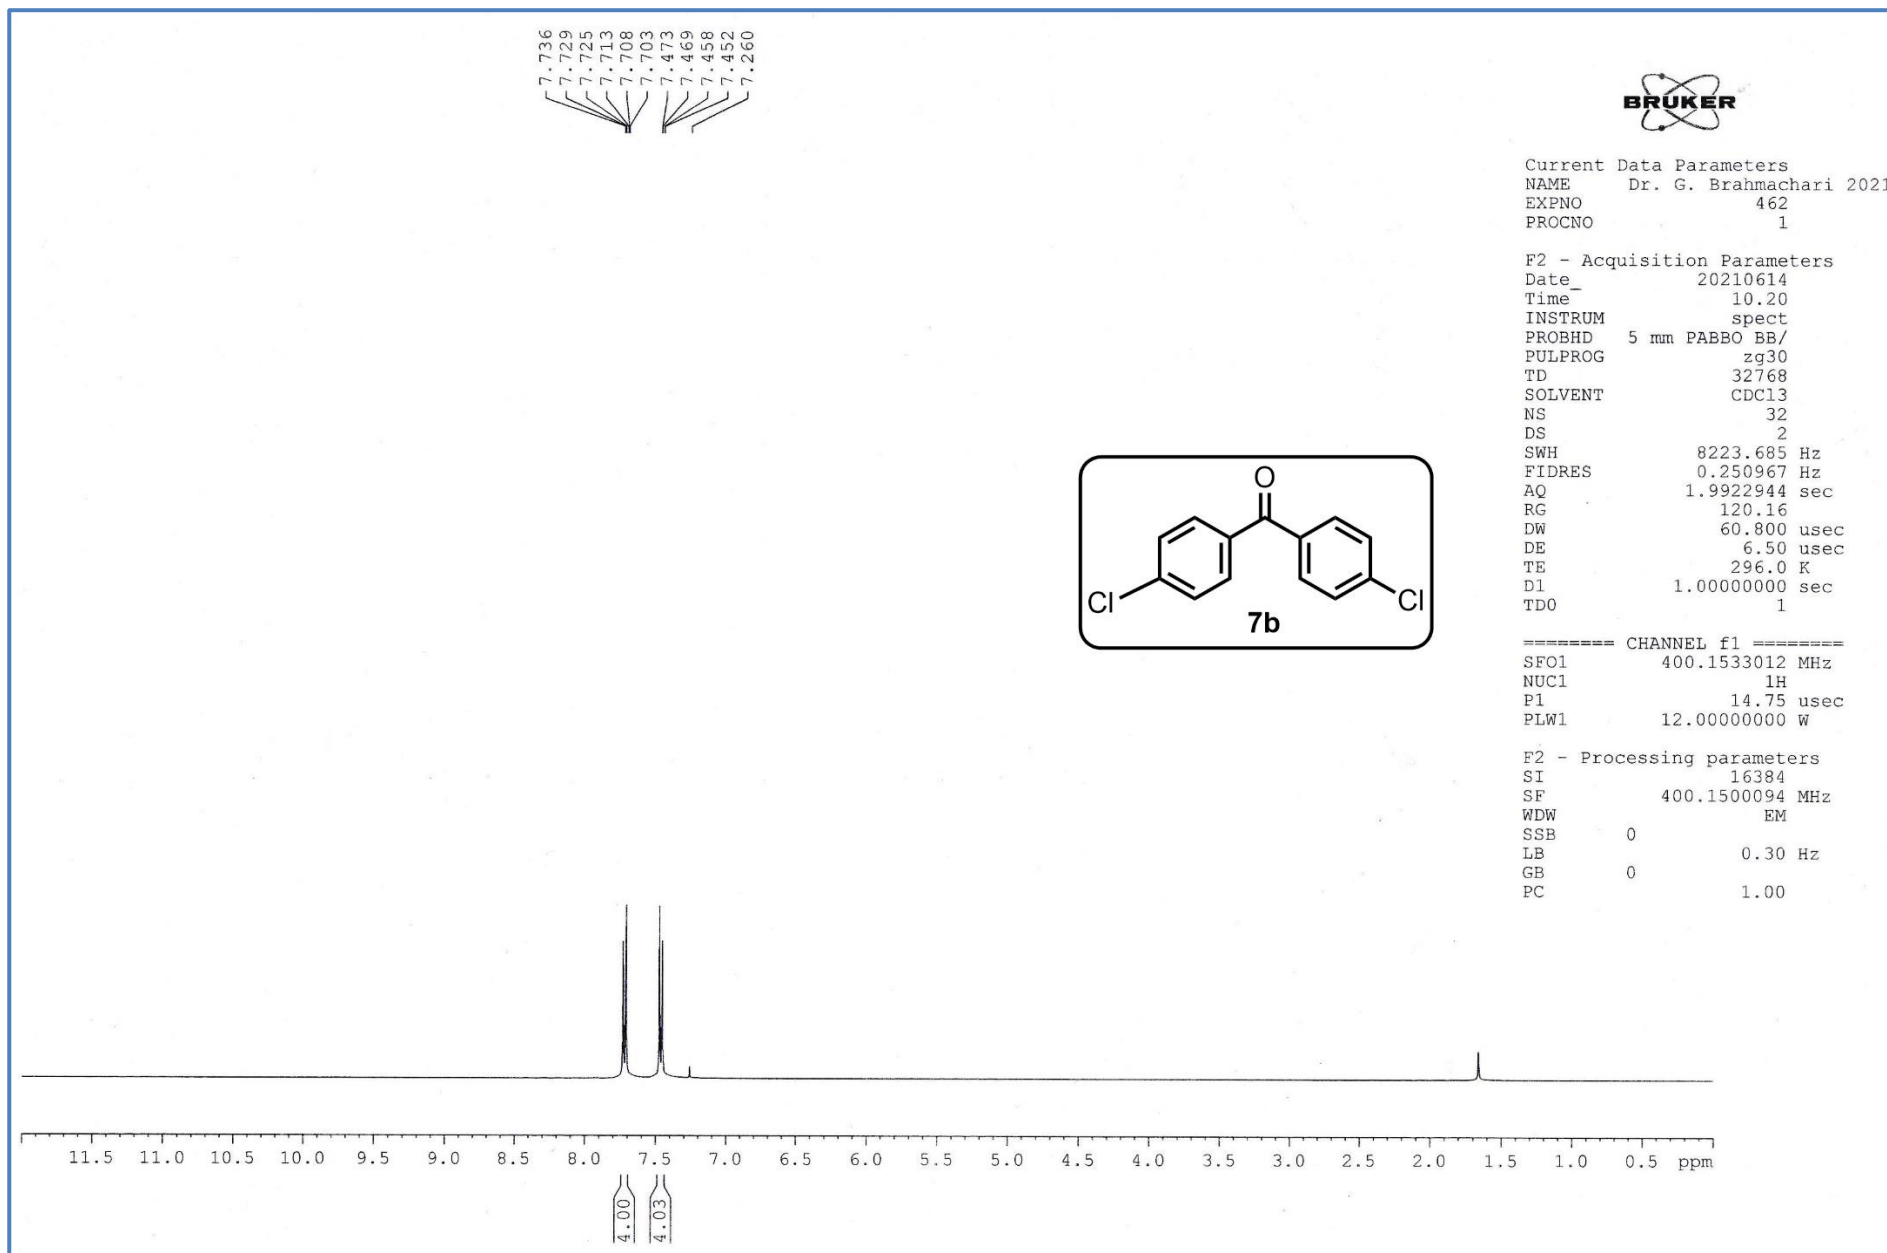

Figure S102. <sup>1</sup>H-NMR spectrum of bis(4-chlorophenyl)methanone (**7b**)

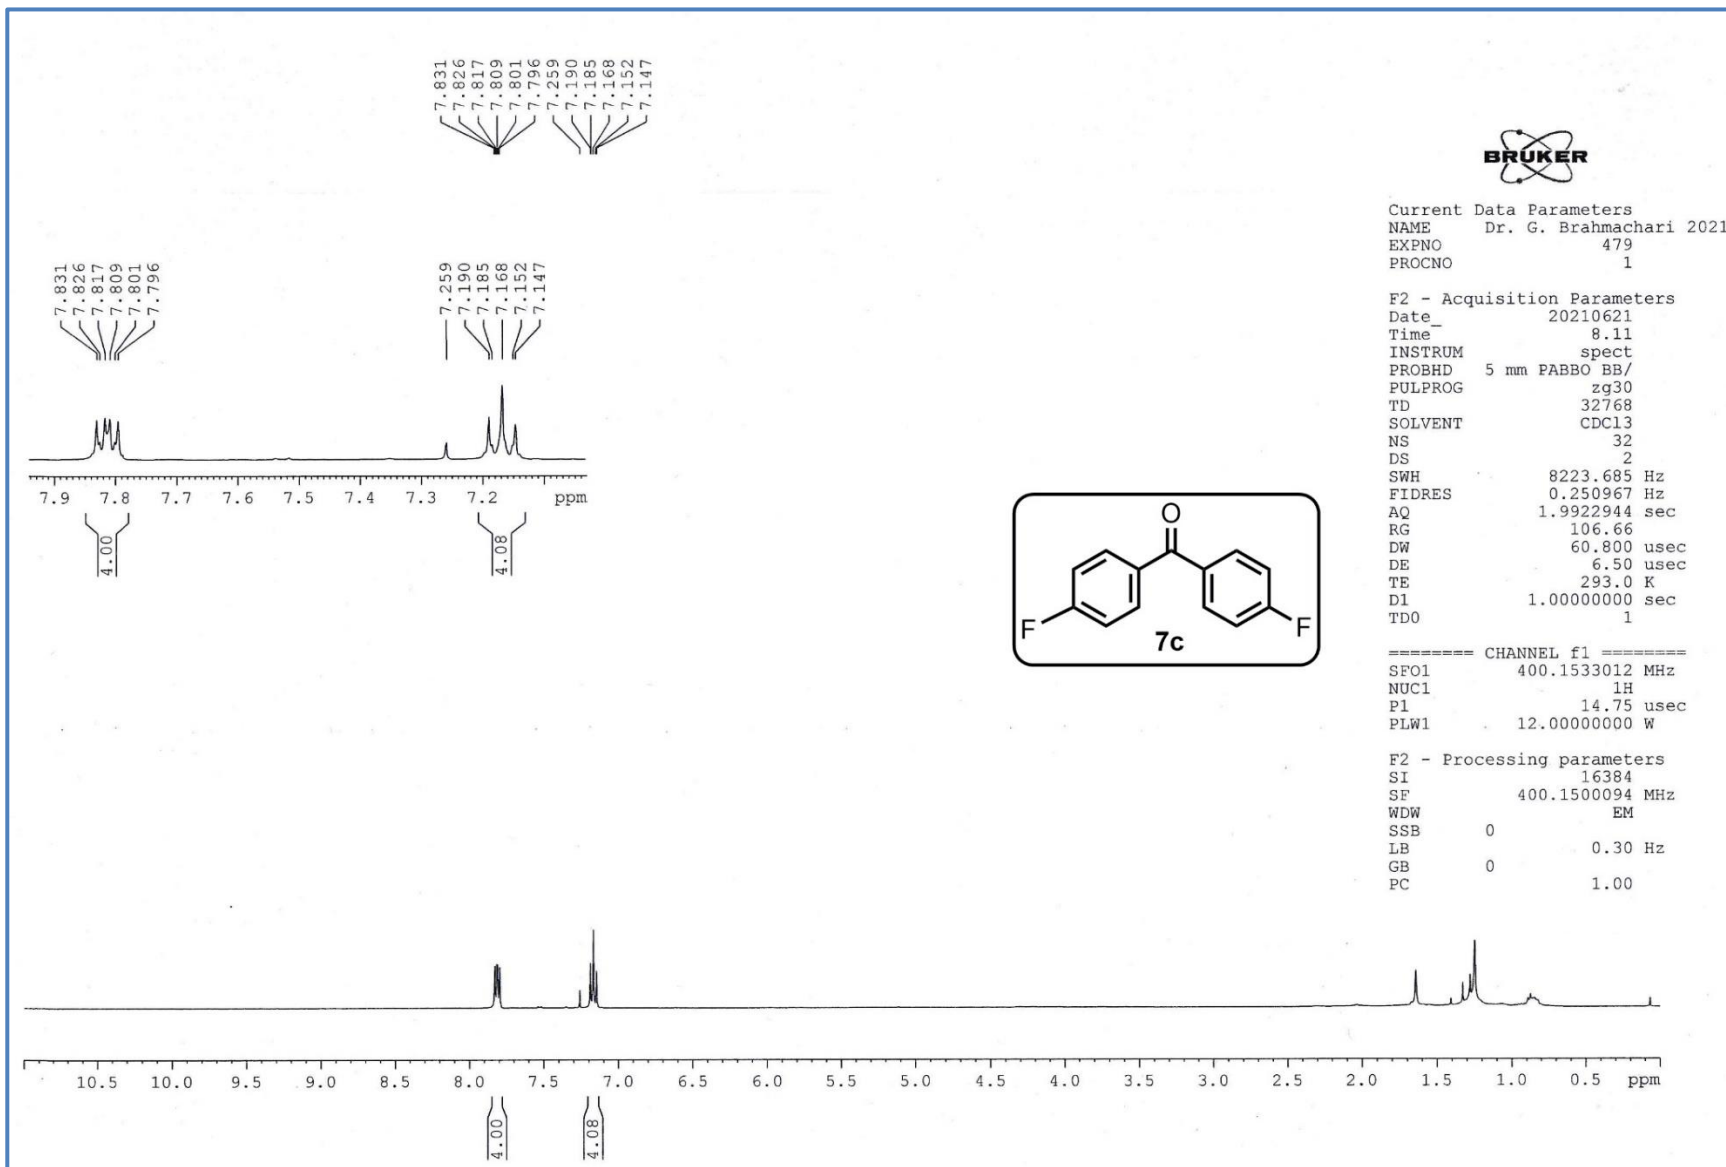

Figure S103. <sup>1</sup>H-NMR spectrum of bis(4-fluorophenyl)methanone (**7c**)

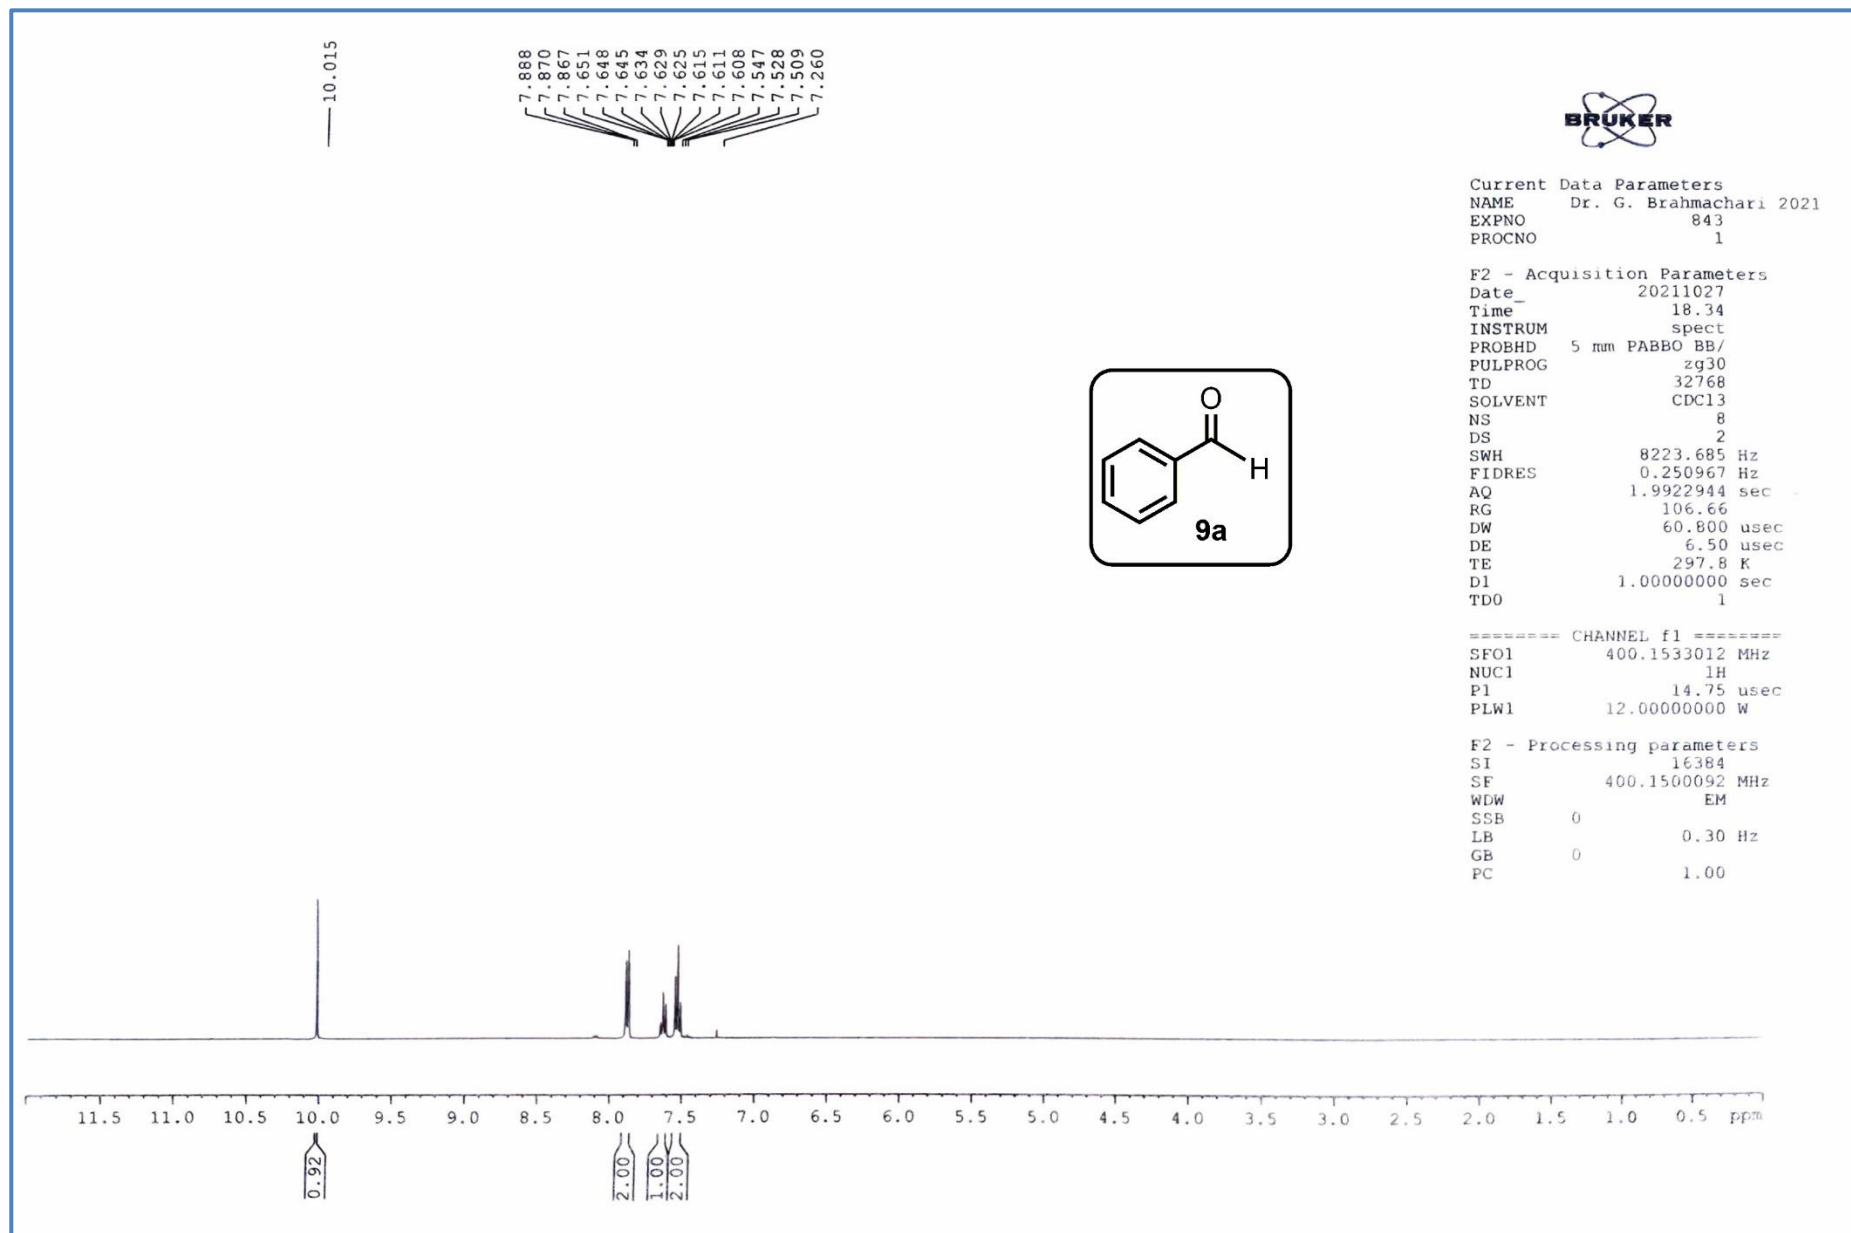

Figure S104. <sup>1</sup>H-NMR spectrum of benzaldehyde (**9a**)

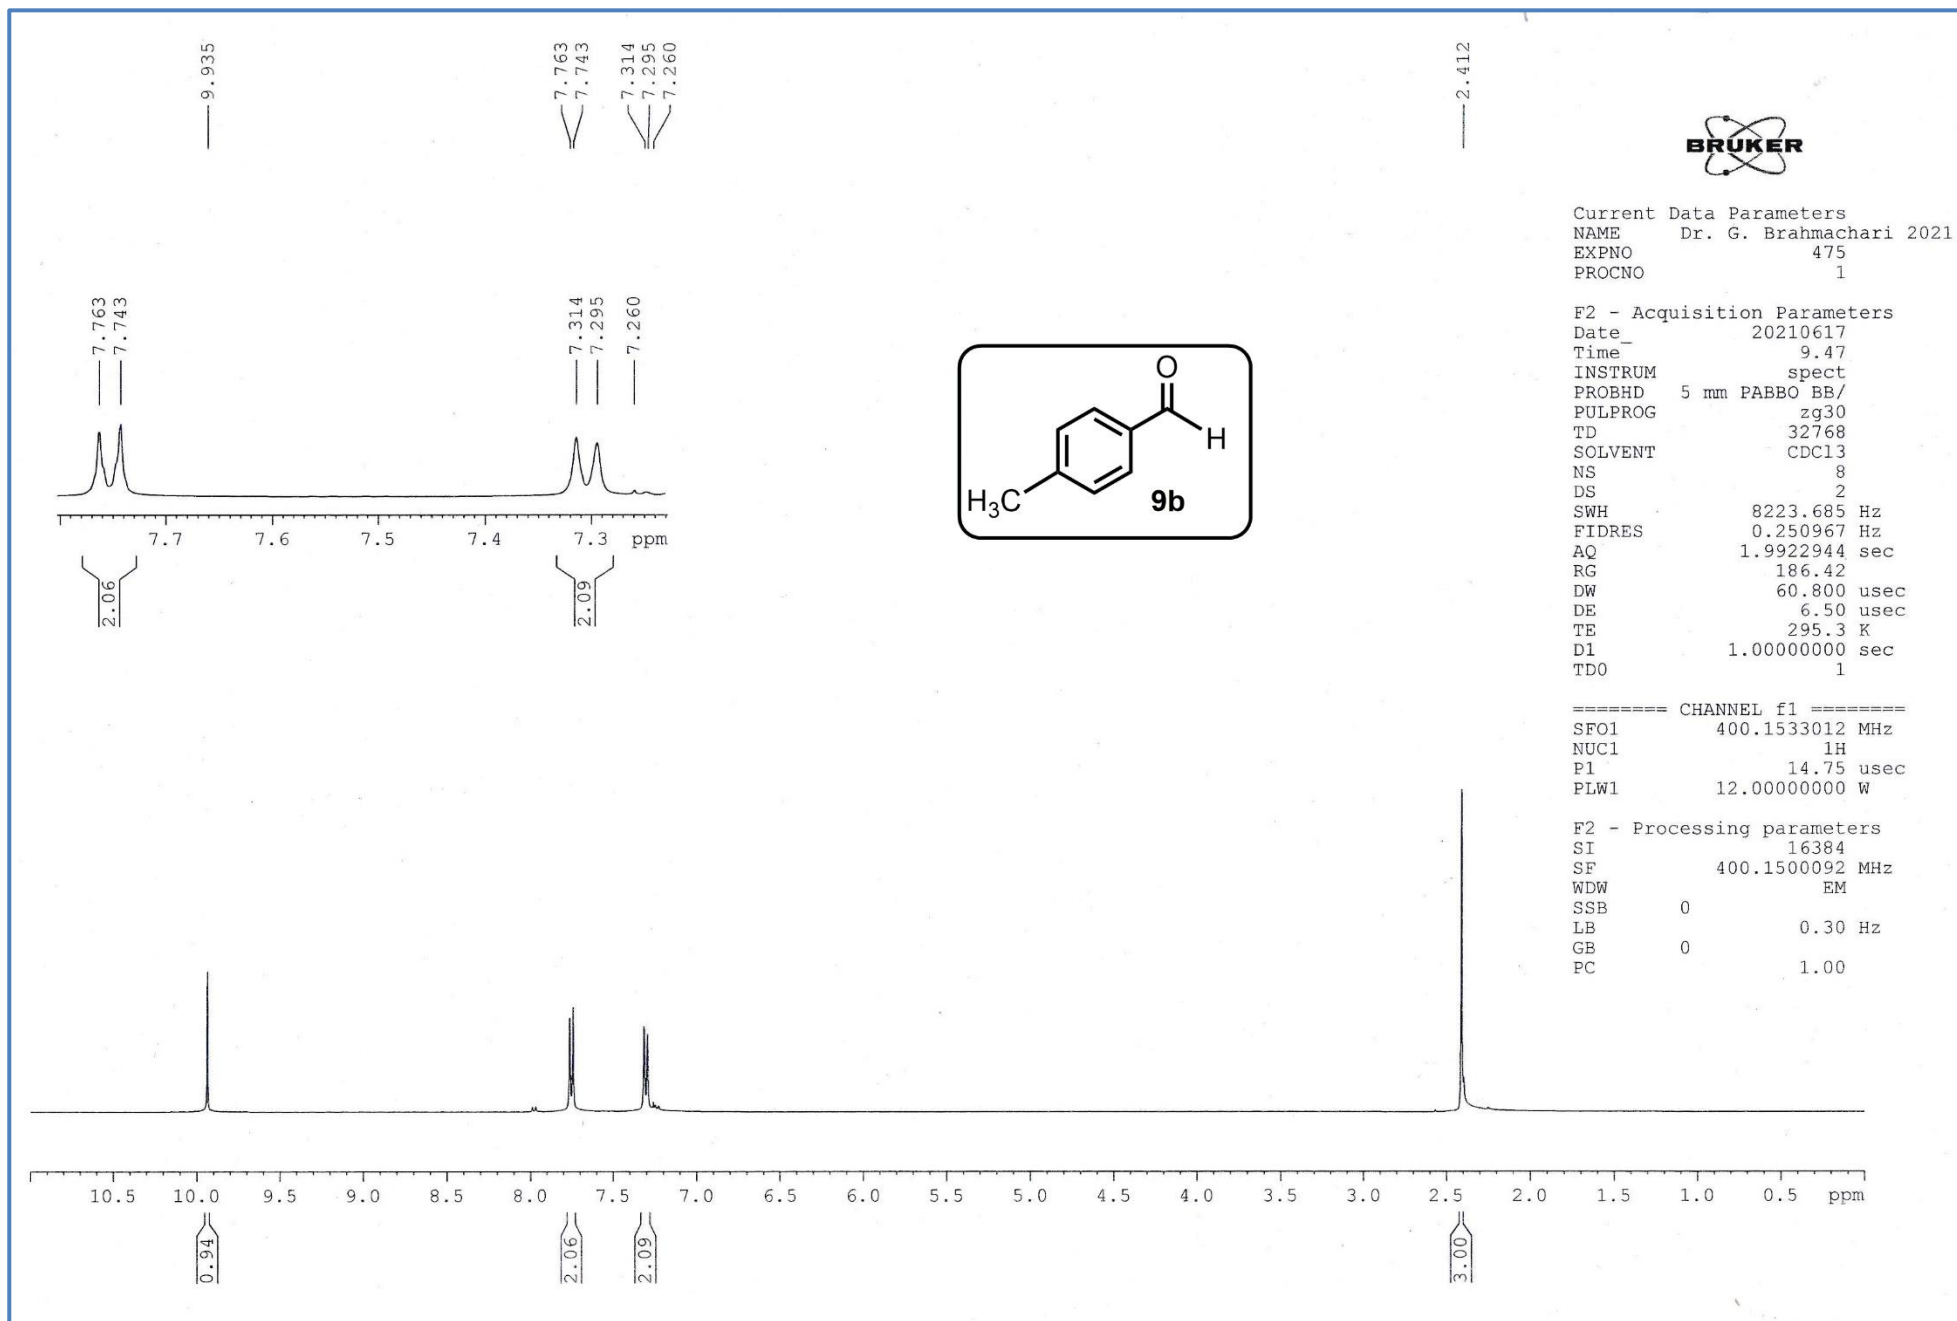

Figure S105. <sup>1</sup>H-NMR spectrum of 4-methylbenzaldehyde (**9b**)



## 7. Single X-ray crystal structure analysis of 6-(Phenylthio)benzo[a]phenazin-5-ol (3a)

### Preparation of single crystals of compound 3a

For preparing single crystals of compound **3a**, 30 mg of the sample was dissolved in 5 mL of DMSO, and the solution was left for 3 days for slow evaporation at ambient temperature to yield reddish block-shaped crystals.

CCDC 2116546 (Compound **3a**) contains the supplementary crystallographic data for this paper. These data can be obtained free of charge from *The Cambridge Crystallographic Data Centre* via [www.ccdc.cam.ac.uk/data\\_request/cif](http://www.ccdc.cam.ac.uk/data_request/cif)

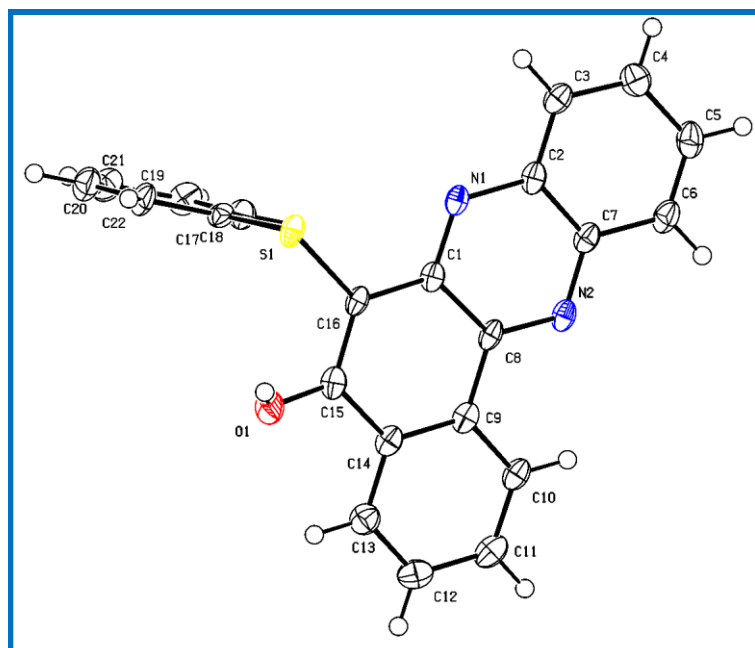

**Figure S106a.** ORTEP view of the molecule, showing the atom-labelling scheme. Displacement ellipsoids are drawn at the 50% probability level and H atoms are shown as small spheres of arbitrary radii.

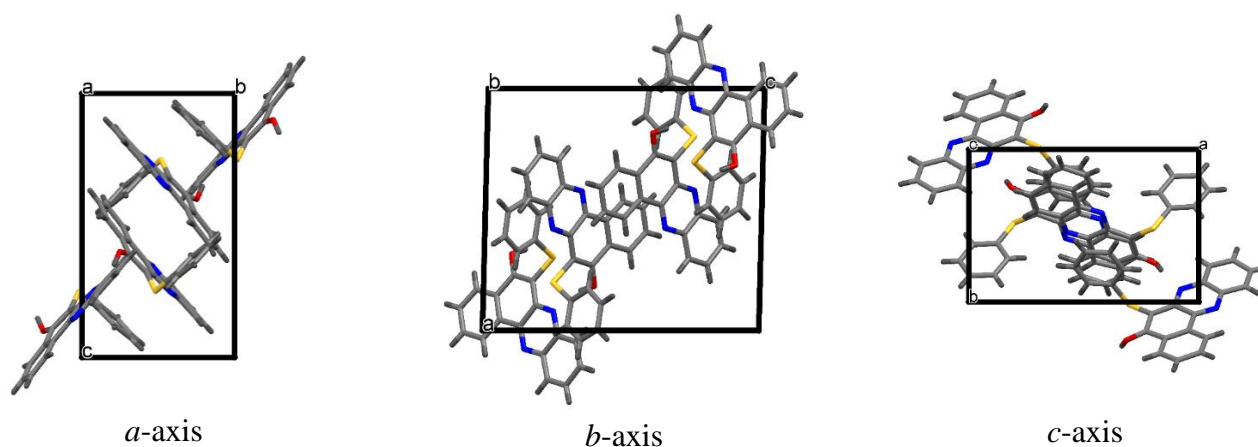

**Figure S106b.** The packing arrangement of molecules viewed down the *a*-axis, *b*-axis and *c*-axis

**Table S2.** Crystal data and structure refinement for 6-(phenylthio)benzo[*a*]phenazin-5-ol (**3a**)

|                                      |                                                               |                 |
|--------------------------------------|---------------------------------------------------------------|-----------------|
| CCDC Number                          | <b>2116546</b>                                                |                 |
| Empirical formula                    | C <sub>22</sub> H <sub>14</sub> N <sub>2</sub> OS             |                 |
| Formula weight                       | 354.41                                                        |                 |
| Temperature                          | 150.02 (18) K                                                 |                 |
| Wavelength                           | 0.71073 Å                                                     |                 |
| Crystal system                       | Monoclinic                                                    |                 |
| Space group                          | P 2 <sub>1</sub> /n                                           |                 |
| Unit cell dimensions                 | a = 12.9621(4) Å                                              | α = 90°         |
|                                      | b = 8.5724 (3) Å                                              | β = 91.399 (3)° |
|                                      | c = 14.8322 (6) Å                                             | γ = 90°         |
| Volume                               | 1647.60 (10) Å <sup>3</sup>                                   |                 |
| Z                                    | 4                                                             |                 |
| Density (calculated)                 | 1.429 g/cm <sup>3</sup>                                       |                 |
| Absorption coefficient               | 0.210 mm <sup>-1</sup>                                        |                 |
| F(000)                               | 736.0                                                         |                 |
| Crystal size                         | 0.334×0.131×0.118 mm <sup>3</sup>                             |                 |
| Crystal shape (colour)               | Block (Red color)                                             |                 |
| Theta range for data collection      | 4.12 to 56.68°                                                |                 |
| Index ranges                         | -16<=h<=14, -4<=k<=11, -9<=l<=19                              |                 |
| Reflections collected                | 5264                                                          |                 |
| Independent reflections              | 3661 [R <sub>int</sub> = 0.0528, R <sub>sigma</sub> = 0.0764] |                 |
| Completeness to theta = 28.340°      | 86.5 %                                                        |                 |
| Refinement method                    | Full-matrix least-squares on F <sup>2</sup>                   |                 |
| Data / restraints / parameters       | 3561 / 0 / 236                                                |                 |
| Goodness-of-fit on F <sup>2</sup>    | 1.049                                                         |                 |
| Final R indices [I >= 2σ(I)]         | R <sub>1</sub> = 0.0673, wR <sub>2</sub> = 0.1783             |                 |
| R indices (all data)                 | R <sub>1</sub> = 0.0858, wR <sub>2</sub> = 0.2057             |                 |
| Largest diff. peak and hole          | 0.73 and -0.76 e.Å <sup>-3</sup>                              |                 |
| Scan mode                            | ω scan                                                        |                 |
| Reflections observed (I > 2σ(I))     | 5264                                                          |                 |
| Structure determination              | Direct methods                                                |                 |
| No. of parameters refined            | 236                                                           |                 |
| Final residual electron density      | 0.73 and -0.76 e.Å <sup>-3</sup>                              |                 |
| Software for geometry calculation    | WinGX [2]                                                     |                 |
| Software for geometrical calculation | PARST [3]                                                     |                 |
| Software for molecular plotting      | PLATON [4], Ortep3 [5]                                        |                 |
| Software for structure solution      | SHELXS-97 [6]                                                 |                 |
| Software for refinement              | SHELXL-97 [7]                                                 |                 |

## 8. References

1. (a) A. Shaabani, R. Ghadari and M. Arabieh, *Helv. Chim. Acta.*, 2014, **97**, 228-236; (b) H. Kour, S. Paul, P. P. Sing and R. Gupta, *Synlett*, 2014, **25**, 495-500; (c) A. S. Choudhary, M. K. Malik, S. R. Patil, K. H. Prabhu, R. R. Deshmukh and N. Sekar, *Can. Chem. Trans.*, 2014, **2**, 365-380; (d) P. Saluja, A. Chaudhary and J. M. Khurana, *Tetrahedron Lett.*, 2014, **55**, 3431-3435; (e) G. H. Mahdavinia, M. Mirzazadeh and B. Notash, *Tetrahedron Lett.*, 2013, **54**, 3487-3492; (f) J. M. Khurana, A. Chaudhary, A. Lumb, A. and B. Nand, *Green Chem.*, 2012, **14**, 2321-2327.
  2. L. J. Farrugia, *J. Appl. Crystallogr.*, 1999, **32**, 837-838.
  3. M. Nardelli, *J. Appl. Crystallogr.*, 1995, **28**, 659.
  4. A. L. Spek, *Acta Crystallogr.*, 2009, **D65**, 148-155.
  5. L. J. Farrugia, *J. Appl. Crystallogr.*, 1997, **30**, 565.
  6. G. M. Sheldrick, SHELXS97, Program for the solution of the crystal structure, University of Gottingen, Germany, 1997.
  7. G. M. Sheldrick, SHELXL97, University of Göttingen, Germany, 1997.
-
